# Supplementary material for: Quantitative Analysis of the Human Milk Whey Proteome Reveals Developing Milk and Mammary-Gland Functions across the First Year of Lactation
Source: MDPI journal article supplement (doi:10.3390/proteomes1020128), 2013-09-03
Supplement: s1 [file s1]

**Supplementary Dataset 1.** List of human milk whey proteins using electrostatic repulsion-hydrophilic interaction chromatography (ERLIC).

| #  | Proteins                                                                                                               | Uniprot ID      | Molecular Weight | Number of unique peptides | Percent of coverage |
|----|------------------------------------------------------------------------------------------------------------------------|-----------------|------------------|---------------------------|---------------------|
| 1  | 14-3-3 protein beta/alpha OS=Homo sapiens GN=YWHAB PE=1 SV=3                                                           | 1433B_HUMAN     | 28 kDa           | 6                         | 52%                 |
| 2  | 14-3-3 protein epsilon OS=Homo sapiens GN=YWHAE PE=1 SV=1                                                              | 1433E_HUMAN     | 29 kDa           | 20                        | 74%                 |
| 3  | 14-3-3 protein eta OS=Homo sapiens GN=YWHAH PE=1 SV=4                                                                  | 1433F_HUMAN     | 28 kDa           | 11                        | 46%                 |
| 4  | 14-3-3 protein gamma OS=Homo sapiens GN=YWHAG PE=1 SV=2                                                                | 1433G_HUMAN     | 28 kDa           | 13                        | 60%                 |
| 5  | 14-3-3 protein sigma OS=Homo sapiens GN=SFN PE=1 SV=1                                                                  | 1433S_HUMAN     | 28 kDa           | 11                        | 52%                 |
| 6  | 14-3-3 protein theta OS=Homo sapiens GN=YWHAQ PE=1 SV=1                                                                | 1433T_HUMAN     | 28 kDa           | 7                         | 48%                 |
| 7  | 14-3-3 protein zeta/delta OS=Homo sapiens GN=YWHAZ PE=1 SV=1                                                           | 1433Z_HUMAN     | 28 kDa           | 15                        | 63%                 |
| 8  | HLA class I histocompatibility antigen, A-3 alpha chain OS=Homo sapiens GN=HLA-A PE=1 SV=2                             | 1A03_HUMAN      | 41 kDa           | 2                         | 24%                 |
| 9  | HLA class I histocompatibility antigen, A-23 alpha chain OS=Homo sapiens GN=HLA-A PE=1 SV=1                            | 1A23_HUMAN (+1) | 41 kDa           | 2                         | 20%                 |
| 10 | HLA class I histocompatibility antigen, A-69 alpha chain OS=Homo sapiens GN=HLA-A PE=1 SV=2                            | 1A69_HUMAN      | 41 kDa           | 5                         | 20%                 |
| 11 | HLA class I histocompatibility antigen, B-35 alpha chain OS=Homo sapiens GN=HLA-B PE=1 SV=1                            | 1B35_HUMAN (+1) | 40 kDa           | 4                         | 24%                 |
| 12 | HLA class I histocompatibility antigen, B-49 alpha chain OS=Homo sapiens GN=HLA-B PE=2 SV=2                            | 1B49_HUMAN (+1) | 41 kDa           | 2                         | 19%                 |
| 13 | HLA class I histocompatibility antigen, Cw-7 alpha chain OS=Homo sapiens GN=HLA-C PE=1 SV=3                            | 1C07_HUMAN      | 41 kDa           | 5                         | 26%                 |
| 14 | Serine/threonine-protein phosphatase 2A 65 kDa regulatory subunit A alpha isoform OS=Homo sapiens GN=PPP2R1A PE=1 SV=4 | 2AAA_HUMAN      | 65 kDa           | 17                        | 34%                 |
| 15 | HLA class II histocompatibility antigen, DRB1-13 beta chain OS=Homo sapiens GN=HLA-DRB1 PE=1 SV=1                      | 2B1D_HUMAN      | 30 kDa           | 2                         | 9.40%               |
| 16 | 3-hydroxyisobutyrate dehydrogenase, mitochondrial OS=Homo sapiens GN=HIBADH PE=1 SV=2                                  | 3HIDH_HUMAN     | 35 kDa           | 4                         | 20%                 |
| 17 | 4F2 cell-surface antigen heavy chain OS=Homo sapiens GN=SLC3A2 PE=1 SV=3                                               | 4F2_HUMAN       | 68 kDa           | 11                        | 20%                 |
| 18 | Cytosolic purine 5'-nucleotidase OS=Homo sapiens GN=NT5C2 PE=1 SV=1                                                    | 5NTC_HUMAN      | 65 kDa           | 2                         | 5.50%               |
| 19 | 6-phosphogluconate dehydrogenase, decarboxylating OS=Homo sapiens GN=PGD PE=1 SV=3                                     | 6PGD_HUMAN      | 53 kDa           | 20                        | 53%                 |
| 20 | 6-phosphogluconolactonase OS=Homo sapiens GN=PGLS PE=1 SV=2                                                            | 6PGL_HUMAN      | 28 kDa           | 6                         | 29%                 |
| 21 | Alpha-1-acid glycoprotein 1 OS=Homo sapiens GN=ORM1 PE=1 SV=1                                                          | A1AG1_HUMAN     | 24 kDa           | 8                         | 41%                 |
| 22 | Alpha-1-acid glycoprotein 2 OS=Homo sapiens GN=ORM2 PE=1 SV=2                                                          | A1AG2_HUMAN     | 24 kDa           | 6                         | 40%                 |
| 23 | Alpha-1-antitrypsin OS=Homo sapiens GN=SERPINA1 PE=1 SV=3                                                              | A1AT_HUMAN      | 47 kDa           | 29                        | 64%                 |
| 24 | Alpha-1B-glycoprotein OS=Homo sapiens GN=A1BG PE=1 SV=4                                                                | A1BG_HUMAN      | 54 kDa           | 14                        | 42%                 |
| 25 | Alpha-2-antiplasmin OS=Homo sapiens GN=SERPINF2 PE=1 SV=3                                                              | A2AP_HUMAN      | 55 kDa           | 15                        | 41%                 |
| 26 | Leucine-rich alpha-2-glycoprotein OS=Homo sapiens GN=LRG1 PE=1 SV=2                                                    | A2GL_HUMAN      | 38 kDa           | 14                        | 54%                 |
| 27 | Alpha-2-macroglobulin OS=Homo sapiens GN=A2M PE=1 SV=3                                                                 | A2MG_HUMAN      | 163 kDa          | 52                        | 48%                 |
| 28 | Amyloid beta A4 protein OS=Homo sapiens GN=APP PE=1 SV=3                                                               | A4_HUMAN        | 87 kDa           | 21                        | 24%                 |
| 29 | Neutral amino acid transporter B(0) OS=Homo sapiens GN=SLC1A5 PE=1 SV=2                                                | AAAT_HUMAN      | 57 kDa           | 4                         | 8.30%               |
| 30 | Acetoacetyl-CoA synthetase OS=Homo sapiens GN=AACS PE=1 SV=1                                                           | AACS_HUMAN      | 75 kDa           | 3                         | 4.80%               |
| 31 | Alpha-1-antichymotrypsin OS=Homo sapiens GN=SERPINA3 PE=1 SV=2                                                         | AACT_HUMAN      | 48 kDa           | 26                        | 62%                 |
| 32 | 5'-AMP-activated protein kinase subunit gamma-1 OS=Homo sapiens GN=PRKAG1 PE=1 SV=1                                    | AAKG1_HUMAN     | 38 kDa           | 3                         | 13%                 |
| 33 | Aspartate aminotransferase, cytoplasmic OS=Homo sapiens GN=GOT1 PE=1 SV=3                                              | AATC_HUMAN      | 46 kDa           | 12                        | 40%                 |
| 34 | ATP-binding cassette sub-family B member 5 OS=Homo sapiens GN=ABCB5 PE=1 SV=3                                          | ABCB5_HUMAN     | 90 kDa           | 2                         | 2.10%               |
| 35 | ATP-binding cassette sub-family E member 1 OS=Homo sapiens GN=ABCE1 PE=1 SV=1                                          | ABCE1_HUMAN     | 67 kDa           | 3                         | 5.70%               |
| 36 | ATP-binding cassette sub-family G member 2 OS=Homo sapiens GN=ABCG2 PE=1 SV=3                                          | ABCG2_HUMAN     | 72 kDa           | 8                         | 16%                 |
| 37 | Abhydrolase domain-containing protein 14B OS=Homo sapiens GN=ABHD14B PE=1 SV=1                                         | ABHEB_HUMAN     | 22 kDa           | 7                         | 41%                 |
| 38 | Acetyl-CoA carboxylase 2 OS=Homo sapiens GN=ACACB PE=1 SV=3                                                            | ACACB_HUMAN     | 277 kDa          | 10                        | 4.70%               |

| #  | Proteins                                                                                                 | Uniprot ID      | Molecular Weight | Number of unique peptides | Percent of coverage |
|----|----------------------------------------------------------------------------------------------------------|-----------------|------------------|---------------------------|---------------------|
| 39 | Acyl-CoA-binding protein OS=Homo sapiens GN=DBI PE=1 SV=2                                                | ACBP_HUMAN      | 10 kDa           | 5                         | 61%                 |
| 40 | Angiotensin-converting enzyme OS=Homo sapiens GN=ACE PE=1 SV=1                                           | ACE_HUMAN       | 150 kDa          | 15                        | 14%                 |
| 41 | Angiotensin-converting enzyme 2 OS=Homo sapiens GN=ACE2 PE=1 SV=2                                        | ACE2_HUMAN      | 92 kDa           | 13                        | 20%                 |
| 42 | ATP-citrate synthase OS=Homo sapiens GN=ACLY PE=1 SV=3                                                   | ACLY_HUMAN      | 121 kDa          | 43                        | 46%                 |
| 43 | Acyl-coenzyme A thioesterase 11 OS=Homo sapiens GN=ACOT11 PE=1 SV=1                                      | ACO11_HUMAN     | 68 kDa           | 2                         | 3.80%               |
| 44 | Cytoplasmic aconitate hydratase OS=Homo sapiens GN=ACO1 PE=1 SV=3                                        | ACOC_HUMAN      | 98 kDa           | 29                        | 44%                 |
| 45 | Acyl-coenzyme A thioesterase 1 OS=Homo sapiens GN=ACOT1 PE=1 SV=1                                        | ACOT1_HUMAN     | 46 kDa           | 4                         | 10%                 |
| 46 | Acylamino-acid-releasing enzyme OS=Homo sapiens GN=APEH PE=1 SV=4                                        | ACPH_HUMAN      | 81 kDa           | 11                        | 18%                 |
| 47 | Acetyl-coenzyme A synthetase, cytoplasmic OS=Homo sapiens GN=ACSS2 PE=1 SV=1                             | ACSA_HUMAN      | 79 kDa           | 10                        | 19%                 |
| 48 | Long-chain-fatty-acid--CoA ligase 1 OS=Homo sapiens GN=ACSL1 PE=1 SV=1                                   | ACSL1_HUMAN     | 78 kDa           | 4                         | 7.30%               |
| 49 | Long-chain-fatty-acid--CoA ligase 3 OS=Homo sapiens GN=ACSL3 PE=1 SV=3                                   | ACSL3_HUMAN     | 80 kDa           | 4                         | 7.50%               |
| 50 | Long-chain-fatty-acid--CoA ligase 4 OS=Homo sapiens GN=ACSL4 PE=1 SV=2                                   | ACSL4_HUMAN     | 79 kDa           | 3                         | 9.30%               |
| 51 | Actin, cytoplasmic 1 OS=Homo sapiens GN=ACTB PE=1 SV=1                                                   | ACTB_HUMAN      | 42 kDa           | 22                        | 63%                 |
| 52 | Beta-actin-like protein 2 OS=Homo sapiens GN=ACTBL2 PE=1 SV=2                                            | ACTBL_HUMAN     | 42 kDa           | 3                         | 18%                 |
| 53 | Actin, alpha cardiac muscle 1 OS=Homo sapiens GN=ACTC1 PE=1 SV=1                                         | ACTC_HUMAN (+1) | 42 kDa           | 2                         | 31%                 |
| 54 | Actin, cytoplasmic 2 OS=Homo sapiens GN=ACTG1 PE=1 SV=1                                                  | ACTG_HUMAN      | 42 kDa           | 2                         | 63%                 |
| 55 | Alpha-actinin-1 OS=Homo sapiens GN=ACTN1 PE=1 SV=2                                                       | ACTN1_HUMAN     | 103 kDa          | 21                        | 48%                 |
| 56 | Alpha-actinin-4 OS=Homo sapiens GN=ACTN4 PE=1 SV=2                                                       | ACTN4_HUMAN     | 105 kDa          | 40                        | 50%                 |
| 57 | Alpha-centractin OS=Homo sapiens GN=ACTR1A PE=1 SV=1                                                     | ACTZ_HUMAN      | 43 kDa           | 2                         | 5.90%               |
| 58 | Aminoacylase-1 OS=Homo sapiens GN=ACY1 PE=1 SV=1                                                         | ACY1_HUMAN      | 46 kDa           | 2                         | 4.90%               |
| 59 | Disintegrin and metalloproteinase domain-containing protein 10 OS=Homo sapiens GN=ADAM10 PE=1 SV=1       | ADA10_HUMAN     | 84 kDa           | 6                         | 12%                 |
| 60 | Disintegrin and metalloproteinase domain-containing protein 15 OS=Homo sapiens GN=ADAM15 PE=1 SV=4       | ADA15_HUMAN     | 93 kDa           | 4                         | 7.00%               |
| 61 | Disintegrin and metalloproteinase domain-containing protein 9 OS=Homo sapiens GN=ADAM9 PE=1 SV=1         | ADAM9_HUMAN     | 91 kDa           | 2                         | 3.50%               |
| 62 | ADAM DEC1 OS=Homo sapiens GN=ADAMDEC1 PE=1 SV=2                                                          | ADEC1_HUMAN     | 53 kDa           | 3                         | 7.40%               |
| 63 | Alcohol dehydrogenase class-3 OS=Homo sapiens GN=ADH5 PE=1 SV=4                                          | ADHX_HUMAN      | 40 kDa           | 7                         | 20%                 |
| 64 | Afadin OS=Homo sapiens GN=MLLT4 PE=1 SV=3                                                                | AFAD_HUMAN      | 207 kDa          | 2                         | 0.82%               |
| 65 | Afamin OS=Homo sapiens GN=AFM PE=1 SV=1                                                                  | AFAM_HUMAN      | 69 kDa           | 13                        | 22%                 |
| 66 | Phosphoacetylglucosamine mutase OS=Homo sapiens GN=PGM3 PE=1 SV=1                                        | AGM1_HUMAN      | 60 kDa           | 8                         | 13%                 |
| 67 | Anterior gradient protein 2 homolog OS=Homo sapiens GN=AGR2 PE=1 SV=1                                    | AGR2_HUMAN      | 20 kDa           | 2                         | 13%                 |
| 68 | Agrin OS=Homo sapiens GN=AGRN PE=1 SV=4                                                                  | AGRIN_HUMAN     | 215 kDa          | 3                         | 1.80%               |
| 69 | Activator of 90 kDa heat shock protein ATPase homolog 1 OS=Homo sapiens GN=AHSA1 PE=1 SV=1               | AHSA1_HUMAN     | 38 kDa           | 3                         | 12%                 |
| 70 | Allograft inflammatory factor 1-like OS=Homo sapiens GN=AIF1L PE=1 SV=1                                  | AIF1L_HUMAN     | 17 kDa           | 7                         | 43%                 |
| 71 | Aminoacyl tRNA synthase complex-interacting multifunctional protein 1 OS=Homo sapiens GN=AIMP1 PE=1 SV=2 | AIMP1_HUMAN     | 34 kDa           | 4                         | 18%                 |
| 72 | Aminoacyl tRNA synthase complex-interacting multifunctional protein 2 OS=Homo sapiens GN=AIMP2 PE=1 SV=2 | AIMP2_HUMAN     | 35 kDa           | 2                         | 5.30%               |
| 73 | Alcohol dehydrogenase [NADP+] OS=Homo sapiens GN=AKR1A1 PE=1 SV=3                                        | AK1A1_HUMAN     | 37 kDa           | 22                        | 79%                 |
| 74 | Aldo-keto reductase family 1 member C1 OS=Homo sapiens GN=AKR1C1 PE=1 SV=1                               | AK1C1_HUMAN     | 37 kDa           | 3                         | 37%                 |
| 75 | Aldo-keto reductase family 1 member C3 OS=Homo sapiens GN=AKR1C3 PE=1 SV=4                               | AK1C3_HUMAN     | 37 kDa           | 11                        | 42%                 |
| 76 | Retinal dehydrogenase 1 OS=Homo sapiens GN=ALDH1A1 PE=1 SV=2                                             | AL1A1_HUMAN     | 55 kDa           | 24                        | 49%                 |
| 77 | Aldehyde dehydrogenase family 1 member A3 OS=Homo sapiens GN=ALDH1A3 PE=1 SV=2                           | AL1A3_HUMAN     | 56 kDa           | 20                        | 41%                 |

| #   | Proteins                                                                                                   | Uniprot ID  | Molecular Weight | Number of unique peptides | Percent of coverage |
|-----|------------------------------------------------------------------------------------------------------------|-------------|------------------|---------------------------|---------------------|
| 78  | Aldehyde dehydrogenase family 1 member L1 OS=Homo sapiens GN=ALDH1L1 PE=1 SV=2                             | AL1L1_HUMAN | 99 kDa           | 44                        | 55%                 |
| 79  | Alpha-aminoacidic semialdehyde dehydrogenase OS=Homo sapiens GN=ALDH7A1 PE=1 SV=5                          | AL7A1_HUMAN | 58 kDa           | 17                        | 39%                 |
| 80  | 4-trimethylaminobutyraldehyde dehydrogenase OS=Homo sapiens GN=ALDH9A1 PE=1 SV=3                           | AL9A1_HUMAN | 54 kDa           | 21                        | 51%                 |
| 81  | Alanine aminotransferase 1 OS=Homo sapiens GN=GPT PE=1 SV=3                                                | ALAT1_HUMAN | 55 kDa           | 11                        | 31%                 |
| 82  | Serum albumin OS=Homo sapiens GN=ALB PE=1 SV=2                                                             | ALBU_HUMAN  | 69 kDa           | 66                        | 84%                 |
| 83  | Fructose-bisphosphate aldolase A OS=Homo sapiens GN=ALDOA PE=1 SV=2                                        | ALDOA_HUMAN | 39 kDa           | 31                        | 80%                 |
| 84  | Fructose-bisphosphate aldolase C OS=Homo sapiens GN=ALDOC PE=1 SV=2                                        | ALDOC_HUMAN | 39 kDa           | 13                        | 51%                 |
| 85  | Insulin-like growth factor-binding protein complex acid labile subunit OS=Homo sapiens GN=IGFALS PE=1 SV=1 | ALS_HUMAN   | 66 kDa           | 5                         | 12%                 |
| 86  | Protein AMBP OS=Homo sapiens GN=AMBP PE=1 SV=1                                                             | AMBP_HUMAN  | 39 kDa           | 11                        | 41%                 |
| 87  | Peptidyl-glycine alpha-amidating monooxygenase OS=Homo sapiens GN=PAM PE=1 SV=2                            | AMD_HUMAN   | 108 kDa          | 4                         | 4.20%               |
| 88  | Aminopeptidase B OS=Homo sapiens GN=RNPEP PE=1 SV=2                                                        | AMPB_HUMAN  | 73 kDa           | 19                        | 33%                 |
| 89  | Cytosol aminopeptidase OS=Homo sapiens GN=LAP3 PE=1 SV=3                                                   | AMPL_HUMAN  | 56 kDa           | 31                        | 72%                 |
| 90  | Aminopeptidase N OS=Homo sapiens GN=ANPEP PE=1 SV=4                                                        | AMPN_HUMAN  | 110 kDa          | 5                         | 5.90%               |
| 91  | Alpha-2-macroglobulin receptor-associated protein OS=Homo sapiens GN=LRPAP1 PE=1 SV=1                      | AMRP_HUMAN  | 41 kDa           | 5                         | 12%                 |
| 92  | Alpha-amylase 1 OS=Homo sapiens GN=AMY1A PE=1 SV=2                                                         | AMY1_HUMAN  | 58 kDa           | 29                        | 74%                 |
| 93  | Alpha-N-acetylglucosaminidase OS=Homo sapiens GN=NAGLU PE=1 SV=2                                           | ANAG_HUMAN  | 82 kDa           | 17                        | 34%                 |
| 94  | Angiogenin OS=Homo sapiens GN=ANG PE=1 SV=1                                                                | ANGI_HUMAN  | 17 kDa           | 3                         | 27%                 |
| 95  | Angiopoietin-related protein 4 OS=Homo sapiens GN=ANGPTL4 PE=1 SV=2                                        | ANGL4_HUMAN | 45 kDa           | 11                        | 39%                 |
| 96  | Angiotensinogen OS=Homo sapiens GN=AGT PE=1 SV=1                                                           | ANGT_HUMAN  | 53 kDa           | 10                        | 28%                 |
| 97  | Antithrombin-III OS=Homo sapiens GN=SERPINC1 PE=1 SV=1                                                     | ANT3_HUMAN  | 53 kDa           | 21                        | 44%                 |
| 98  | Annexin A2 OS=Homo sapiens GN=ANXA2 PE=1 SV=2                                                              | ANXA2_HUMAN | 39 kDa           | 8                         | 28%                 |
| 99  | Annexin A5 OS=Homo sapiens GN=ANXA5 PE=1 SV=2                                                              | ANXA5_HUMAN | 36 kDa           | 7                         | 23%                 |
| 100 | Annexin A6 OS=Homo sapiens GN=ANXA6 PE=1 SV=3                                                              | ANXA6_HUMAN | 76 kDa           | 3                         | 5.90%               |
| 101 | AP-1 complex subunit beta-1 OS=Homo sapiens GN=AP1B1 PE=1 SV=2                                             | AP1B1_HUMAN | 105 kDa          | 7                         | 9.20%               |
| 102 | AP-1 complex subunit gamma-1 OS=Homo sapiens GN=AP1G1 PE=1 SV=5                                            | AP1G1_HUMAN | 91 kDa           | 3                         | 3.80%               |
| 103 | AP-2 complex subunit alpha-1 OS=Homo sapiens GN=AP2A1 PE=1 SV=3                                            | AP2A1_HUMAN | 108 kDa          | 2                         | 2.00%               |
| 104 | Amyloid-like protein 2 OS=Homo sapiens GN=APLP2 PE=1 SV=2                                                  | APLP2_HUMAN | 87 kDa           | 3                         | 5.90%               |
| 105 | Apolipoprotein A-I OS=Homo sapiens GN=APOA1 PE=1 SV=1                                                      | APOA1_HUMAN | 31 kDa           | 30                        | 78%                 |
| 106 | Apolipoprotein A-II OS=Homo sapiens GN=APOA2 PE=1 SV=1                                                     | APOA2_HUMAN | 11 kDa           | 7                         | 69%                 |
| 107 | Apolipoprotein A-IV OS=Homo sapiens GN=APOA4 PE=1 SV=3                                                     | APOA4_HUMAN | 45 kDa           | 28                        | 63%                 |
| 108 | Apolipoprotein B-100 OS=Homo sapiens GN=APOB PE=1 SV=2                                                     | APOB_HUMAN  | 516 kDa          | 103                       | 27%                 |
| 109 | Apolipoprotein B receptor OS=Homo sapiens GN=APOBR PE=1 SV=1                                               | APOBR_HUMAN | 115 kDa          | 8                         | 8.50%               |
| 110 | Apolipoprotein C-III OS=Homo sapiens GN=APOC3 PE=1 SV=1                                                    | APOC3_HUMAN | 11 kDa           | 2                         | 27%                 |
| 111 | Apolipoprotein D OS=Homo sapiens GN=APOD PE=1 SV=1                                                         | APOD_HUMAN  | 21 kDa           | 8                         | 38%                 |
| 112 | Apolipoprotein E OS=Homo sapiens GN=APOE PE=1 SV=1                                                         | APOE_HUMAN  | 36 kDa           | 24                        | 71%                 |
| 113 | Apolipoprotein F OS=Homo sapiens GN=APOF PE=1 SV=2                                                         | APOF_HUMAN  | 35 kDa           | 2                         | 8.30%               |
| 114 | Beta-2-glycoprotein 1 OS=Homo sapiens GN=APOH PE=1 SV=3                                                    | APOH_HUMAN  | 38 kDa           | 12                        | 46%                 |
| 115 | Apolipoprotein M OS=Homo sapiens GN=APOM PE=1 SV=2                                                         | APOM_HUMAN  | 21 kDa           | 2                         | 8.50%               |
| 116 | Adenine phosphoribosyltransferase OS=Homo sapiens GN=APRT PE=1 SV=2                                        | APT_HUMAN   | 20 kDa           | 12                        | 86%                 |
| 117 | Actin-related protein 2/3 complex subunit 1B OS=Homo sapiens GN=ARPC1B PE=1 SV=3                           | ARC1B_HUMAN | 41 kDa           | 10                        | 38%                 |
| 118 | ADP-ribosylation factor 1 OS=Homo sapiens GN=ARF1 PE=1 SV=2                                                | ARF1_HUMAN  | 21 kDa           | 11                        | 69%                 |

| #   | Proteins                                                                                          | Uniprot ID  | Molecular Weight | Number of unique peptides | Percent of coverage |
|-----|---------------------------------------------------------------------------------------------------|-------------|------------------|---------------------------|---------------------|
| 119 | ADP-ribosylation factor 4 OS=Homo sapiens GN=ARF4 PE=1 SV=3                                       | ARF4_HUMAN  | 21 kDa           | 2                         | 42%                 |
| 120 | ADP-ribosylation factor 6 OS=Homo sapiens GN=ARF6 PE=1 SV=2                                       | ARF6_HUMAN  | 20 kDa           | 2                         | 15%                 |
| 121 | Poly(ADP-ribose) glycohydrolase ARH3 OS=Homo sapiens GN=ADPRHL2 PE=1 SV=1                         | ARHL2_HUMAN | 39 kDa           | 2                         | 5.50%               |
| 122 | Aflatoxin B1 aldehyde reductase member 2 OS=Homo sapiens GN=AKR7A2 PE=1 SV=3                      | ARK72_HUMAN | 40 kDa           | 9                         | 28%                 |
| 123 | ADP-ribosylation factor-like protein 3 OS=Homo sapiens GN=ARL3 PE=1 SV=2                          | ARL3_HUMAN  | 20 kDa           | 3                         | 17%                 |
| 124 | Argininosuccinate lyase OS=Homo sapiens GN=ASL PE=1 SV=4                                          | ARLY_HUMAN  | 52 kDa           | 13                        | 30%                 |
| 125 | Actin-related protein 2 OS=Homo sapiens GN=ACTR2 PE=1 SV=1                                        | ARP2_HUMAN  | 45 kDa           | 6                         | 16%                 |
| 126 | Actin-related protein 3 OS=Homo sapiens GN=ACTR3 PE=1 SV=3                                        | ARP3_HUMAN  | 47 kDa           | 13                        | 36%                 |
| 127 | Actin-related protein 2/3 complex subunit 5-like protein OS=Homo sapiens GN=ARPC5L PE=1 SV=1      | ARP5L_HUMAN | 17 kDa           | 3                         | 29%                 |
| 128 | Actin-related protein 2/3 complex subunit 2 OS=Homo sapiens GN=ARPC2 PE=1 SV=1                    | ARPC2_HUMAN | 34 kDa           | 6                         | 20%                 |
| 129 | Actin-related protein 2/3 complex subunit 3 OS=Homo sapiens GN=ARPC3 PE=1 SV=3                    | ARPC3_HUMAN | 21 kDa           | 3                         | 17%                 |
| 130 | Actin-related protein 2/3 complex subunit 4 OS=Homo sapiens GN=ARPC4 PE=1 SV=3                    | ARPC4_HUMAN | 20 kDa           | 6                         | 46%                 |
| 131 | Beta-arrestin-1 OS=Homo sapiens GN=ARRB1 PE=1 SV=2                                                | ARRB1_HUMAN | 47 kDa           | 5                         | 15%                 |
| 132 | Arylsulfatase A OS=Homo sapiens GN=ARSA PE=1 SV=3                                                 | ARSA_HUMAN  | 54 kDa           | 10                        | 25%                 |
| 133 | Acid ceramidase OS=Homo sapiens GN=ASAH1 PE=1 SV=5                                                | ASAH1_HUMAN | 45 kDa           | 4                         | 12%                 |
| 134 | Apoptosis-associated speck-like protein containing a CARD OS=Homo sapiens GN=PYCARD PE=1 SV=2     | ASC_HUMAN   | 22 kDa           | 4                         | 24%                 |
| 135 | L-asparaginase OS=Homo sapiens GN=ASRGL1 PE=1 SV=2                                                | ASGL1_HUMAN | 32 kDa           | 2                         | 9.10%               |
| 136 | Sphingomyelin phosphodiesterase OS=Homo sapiens GN=SMPD1 PE=1 SV=4                                | ASM_HUMAN   | 70 kDa           | 2                         | 3.30%               |
| 137 | Acid sphingomyelinase-like phosphodiesterase 3a OS=Homo sapiens GN=SMPDL3A PE=1 SV=2              | ASM3A_HUMAN | 51 kDa           | 3                         | 7.30%               |
| 138 | Acid sphingomyelinase-like phosphodiesterase 3b OS=Homo sapiens GN=SMPDL3B PE=2 SV=2              | ASM3B_HUMAN | 51 kDa           | 7                         | 26%                 |
| 139 | N(4)-(beta-N-acetylglucosaminyl)-L-asparaginase OS=Homo sapiens GN=AGA PE=1 SV=2                  | ASPG_HUMAN  | 37 kDa           | 2                         | 5.20%               |
| 140 | Probable cation-transporting ATPase 13A4 OS=Homo sapiens GN=ATP13A4 PE=2 SV=3                     | AT134_HUMAN | 134 kDa          | 3                         | 4.30%               |
| 141 | Ubiquitin-like modifier-activating enzyme ATG7 OS=Homo sapiens GN=ATG7 PE=1 SV=1                  | ATG7_HUMAN  | 78 kDa           | 3                         | 5.00%               |
| 142 | Copper transport protein ATOX1 OS=Homo sapiens GN=ATOX1 PE=1 SV=1                                 | ATOX1_HUMAN | 7 kDa            | 3                         | 38%                 |
| 143 | Attractin OS=Homo sapiens GN=ATRN PE=1 SV=2                                                       | ATRN_HUMAN  | 159 kDa          | 11                        | 9.40%               |
| 144 | Beta-2-microglobulin OS=Homo sapiens GN=B2M PE=1 SV=1                                             | B2MG_HUMAN  | 14 kDa           | 6                         | 47%                 |
| 145 | UDP-GlcNAc:betaGal beta-1,3-N-acetylglucosaminyltransferase 3 OS=Homo sapiens GN=B3GNT3 PE=1 SV=2 | B3GN3_HUMAN | 43 kDa           | 2                         | 7.30%               |
| 146 | UDP-GlcNAc:betaGal beta-1,3-N-acetylglucosaminyltransferase 7 OS=Homo sapiens GN=B3GNT7 PE=2 SV=1 | B3GN7_HUMAN | 46 kDa           | 4                         | 9.70%               |
| 147 | UDP-GlcNAc:betaGal beta-1,3-N-acetylglucosaminyltransferase 9 OS=Homo sapiens GN=B3GNT9 PE=2 SV=1 | B3GN9_HUMAN | 44 kDa           | 2                         | 5.70%               |
| 148 | Beta-1,4-galactosyltransferase 1 OS=Homo sapiens GN=B4GALT1 PE=1 SV=5                             | B4GT1_HUMAN | 44 kDa           | 13                        | 43%                 |
| 149 | B7 homolog 6 OS=Homo sapiens GN=B7H6 PE=1 SV=1                                                    | B7H6_HUMAN  | 51 kDa           | 6                         | 19%                 |
| 150 | Brain-specific angiogenesis inhibitor 1-associated protein 2 OS=Homo sapiens GN=BAIAP2 PE=1 SV=1  | BAIP2_HUMAN | 61 kDa           | 4                         | 8.20%               |
| 151 | Basigin OS=Homo sapiens GN=BSG PE=1 SV=2                                                          | BASI_HUMAN  | 42 kDa           | 4                         | 15%                 |
| 152 | 3-hydroxybutyrate dehydrogenase type 2 OS=Homo sapiens GN=BDH2 PE=1 SV=2                          | BDH2_HUMAN  | 27 kDa           | 5                         | 25%                 |
| 153 | Beta-galactosidase OS=Homo sapiens GN=GLB1 PE=1 SV=2                                              | BGAL_HUMAN  | 76 kDa           | 13                        | 23%                 |
| 154 | Transforming growth factor-beta-induced protein ig-h3 OS=Homo sapiens GN=TGFB1 PE=1 SV=1          | BGH3_HUMAN  | 75 kDa           | 2                         | 3.40%               |
| 155 | Brefeldin A-inhibited guanine nucleotide-exchange protein 2 OS=Homo sapiens GN=ARFGEF2 PE=1 SV=3  | BIG2_HUMAN  | 202 kDa          | 2                         | 1.60%               |
| 156 | Myc box-dependent-interacting protein 1 OS=Homo sapiens GN=BIN1 PE=1 SV=1                         | BIN1_HUMAN  | 65 kDa           | 5                         | 11%                 |

| #   | Proteins                                                                                        | Uniprot ID  | Molecular Weight | Number of unique peptides | Percent of coverage |
|-----|-------------------------------------------------------------------------------------------------|-------------|------------------|---------------------------|---------------------|
| 157 | Flavin reductase OS=Homo sapiens GN=BLVRB PE=1 SV=3                                             | BLVRB_HUMAN | 22 kDa           | 4                         | 26%                 |
| 158 | Bone morphogenetic protein 1 OS=Homo sapiens GN=BMP1 PE=1 SV=2                                  | BMP1_HUMAN  | 111 kDa          | 3                         | 3.00%               |
| 159 | 3'(2'),5'-bisphosphate nucleotidase 1 OS=Homo sapiens GN=BPNT1 PE=1 SV=1                        | BPNT1_HUMAN | 33 kDa           | 11                        | 35%                 |
| 160 | BRO1 domain-containing protein BROX OS=Homo sapiens GN=BROX PE=1 SV=1                           | BROX_HUMAN  | 46 kDa           | 4                         | 15%                 |
| 161 | Brain-specific serine protease 4 OS=Homo sapiens GN=PRSS22 PE=1 SV=1                            | BSSP4_HUMAN | 34 kDa           | 5                         | 19%                 |
| 162 | Butyrophilin subfamily 1 member A1 OS=Homo sapiens GN=BTN1A1 PE=1 SV=3                          | BT1A1_HUMAN | 59 kDa           | 30                        | 47%                 |
| 163 | Transcription factor BTF3 homolog 4 OS=Homo sapiens GN=BTF3L4 PE=1 SV=1                         | BT3L4_HUMAN | 17 kDa           | 2                         | 12%                 |
| 164 | Biotinidase OS=Homo sapiens GN=BTD PE=1 SV=2                                                    | BTD_HUMAN   | 61 kDa           | 10                        | 22%                 |
| 165 | Complement C1q tumor necrosis factor-related protein 1 OS=Homo sapiens GN=C1QTNF1 PE=1 SV=1     | C1QT1_HUMAN | 32 kDa           | 3                         | 10%                 |
| 166 | Complement C1r subcomponent OS=Homo sapiens GN=C1R PE=1 SV=2                                    | C1R_HUMAN   | 80 kDa           | 6                         | 12%                 |
| 167 | Complement C1r subcomponent-like protein OS=Homo sapiens GN=C1RL PE=1 SV=2                      | C1RL_HUMAN  | 53 kDa           | 10                        | 24%                 |
| 168 | Complement C1s subcomponent OS=Homo sapiens GN=C1S PE=1 SV=1                                    | C1S_HUMAN   | 77 kDa           | 5                         | 8.40%               |
| 169 | C-1-tetrahydrofolate synthase, cytoplasmic OS=Homo sapiens GN=MTHFD1 PE=1 SV=3                  | C1TC_HUMAN  | 102 kDa          | 14                        | 15%                 |
| 170 | C4b-binding protein alpha chain OS=Homo sapiens GN=C4BPA PE=1 SV=2                              | C4BPA_HUMAN | 67 kDa           | 12                        | 23%                 |
| 171 | Voltage-dependent calcium channel subunit alpha-2/delta-1 OS=Homo sapiens GN=CACNA2D1 PE=1 SV=3 | CA2D1_HUMAN | 125 kDa          | 5                         | 6.60%               |
| 172 | Calcium-binding protein 39 OS=Homo sapiens GN=CAB39 PE=1 SV=1                                   | CAB39_HUMAN | 40 kDa           | 9                         | 25%                 |
| 173 | 45 kDa calcium-binding protein OS=Homo sapiens GN=SDF4 PE=1 SV=1                                | CAB45_HUMAN | 42 kDa           | 19                        | 56%                 |
| 174 | Cadherin-1 OS=Homo sapiens GN=CDH1 PE=1 SV=3                                                    | CADH1_HUMAN | 97 kDa           | 6                         | 7.30%               |
| 175 | Carbonic anhydrase 2 OS=Homo sapiens GN=CA2 PE=1 SV=2                                           | CAH2_HUMAN  | 29 kDa           | 6                         | 27%                 |
| 176 | Carbonic anhydrase 6 OS=Homo sapiens GN=CA6 PE=1 SV=3                                           | CAH6_HUMAN  | 35 kDa           | 12                        | 42%                 |
| 177 | Calretinin OS=Homo sapiens GN=CALB2 PE=1 SV=2                                                   | CALB2_HUMAN | 32 kDa           | 14                        | 53%                 |
| 178 | Calmodulin-like protein 5 OS=Homo sapiens GN=CALML5 PE=1 SV=2                                   | CALL5_HUMAN | 16 kDa           | 13                        | 78%                 |
| 179 | Calmodulin OS=Homo sapiens GN=CALM1 PE=1 SV=2                                                   | CALM_HUMAN  | 17 kDa           | 8                         | 56%                 |
| 180 | Calreticulin OS=Homo sapiens GN=CALR PE=1 SV=1                                                  | CALR_HUMAN  | 48 kDa           | 8                         | 28%                 |
| 181 | Calumenin OS=Homo sapiens GN=CALU PE=1 SV=2                                                     | CALU_HUMAN  | 37 kDa           | 7                         | 20%                 |
| 182 | Calnexin OS=Homo sapiens GN=CANX PE=1 SV=2                                                      | CALX_HUMAN  | 68 kDa           | 2                         | 4.60%               |
| 183 | Calpain-1 catalytic subunit OS=Homo sapiens GN=CAPN1 PE=1 SV=1                                  | CAN1_HUMAN  | 82 kDa           | 9                         | 15%                 |
| 184 | Calcineurin subunit B type 1 OS=Homo sapiens GN=PPP3R1 PE=1 SV=2                                | CANB1_HUMAN | 19 kDa           | 3                         | 16%                 |
| 185 | Cullin-associated NEDD8-dissociated protein 1 OS=Homo sapiens GN=CAND1 PE=1 SV=2                | CAND1_HUMAN | 136 kDa          | 22                        | 21%                 |
| 186 | Soluble calcium-activated nucleotidase 1 OS=Homo sapiens GN=CANT1 PE=1 SV=1                     | CANT1_HUMAN | 45 kDa           | 8                         | 27%                 |
| 187 | Adenylyl cyclase-associated protein 1 OS=Homo sapiens GN=CAP1 PE=1 SV=5                         | CAP1_HUMAN  | 52 kDa           | 14                        | 35%                 |
| 188 | Macrophage-capping protein OS=Homo sapiens GN=CAPG PE=1 SV=2                                    | CAPG_HUMAN  | 38 kDa           | 14                        | 56%                 |
| 189 | Caprin-1 OS=Homo sapiens GN=CAPRIN1 PE=1 SV=2                                                   | CAPR1_HUMAN | 78 kDa           | 4                         | 5.20%               |
| 190 | F-actin-capping protein subunit beta OS=Homo sapiens GN=CAPZB PE=1 SV=4                         | CAPZB_HUMAN | 31 kDa           | 10                        | 48%                 |
| 191 | Alpha-S1-casein OS=Homo sapiens GN=CSN1S1 PE=1 SV=1                                             | CASA1_HUMAN | 22 kDa           | 16                        | 56%                 |
| 192 | Beta-casein OS=Homo sapiens GN=CSN2 PE=1 SV=4                                                   | CASB_HUMAN  | 25 kDa           | 12                        | 90%                 |
| 193 | Protein CASC4 OS=Homo sapiens GN=CASC4 PE=2 SV=1                                                | CASC4_HUMAN | 49 kDa           | 2                         | 4.40%               |
| 194 | Kappa-casein OS=Homo sapiens GN=CSN3 PE=1 SV=3                                                  | CASK_HUMAN  | 20 kDa           | 10                        | 68%                 |
| 195 | Caspase-3 OS=Homo sapiens GN=CASP3 PE=1 SV=2                                                    | CASP3_HUMAN | 32 kDa           | 4                         | 18%                 |
| 196 | Catalase OS=Homo sapiens GN=CAT PE=1 SV=3                                                       | CATA_HUMAN  | 60 kDa           | 11                        | 25%                 |

| #   | Proteins                                                                                | Uniprot ID  | Molecular Weight | Number of unique peptides | Percent of coverage |
|-----|-----------------------------------------------------------------------------------------|-------------|------------------|---------------------------|---------------------|
| 197 | Cathepsin B OS=Homo sapiens GN=CTSB PE=1 SV=3                                           | CATB_HUMAN  | 38 kDa           | 8                         | 28%                 |
| 198 | Dipeptidyl peptidase 1 OS=Homo sapiens GN=CTSC PE=1 SV=2                                | CATC_HUMAN  | 52 kDa           | 12                        | 31%                 |
| 199 | Cathepsin D OS=Homo sapiens GN=CTSD PE=1 SV=1                                           | CATD_HUMAN  | 45 kDa           | 16                        | 44%                 |
| 200 | Pro-cathepsin H OS=Homo sapiens GN=CTSH PE=1 SV=4                                       | CATH_HUMAN  | 37 kDa           | 4                         | 11%                 |
| 201 | Cathepsin S OS=Homo sapiens GN=CTSS PE=1 SV=3                                           | CATS_HUMAN  | 37 kDa           | 12                        | 43%                 |
| 202 | Cathepsin Z OS=Homo sapiens GN=CTSZ PE=1 SV=1                                           | CATZ_HUMAN  | 34 kDa           | 5                         | 18%                 |
| 203 | F-actin-capping protein subunit alpha-1 OS=Homo sapiens GN=CAPZA1 PE=1 SV=3             | CAZA1_HUMAN | 33 kDa           | 9                         | 44%                 |
| 204 | F-actin-capping protein subunit alpha-2 OS=Homo sapiens GN=CAPZA2 PE=1 SV=3             | CAZA2_HUMAN | 33 kDa           | 5                         | 36%                 |
| 205 | Calcium-binding protein 39-like OS=Homo sapiens GN=CAB39L PE=1 SV=3                     | CB39L_HUMAN | 39 kDa           | 4                         | 15%                 |
| 206 | Corticosteroid-binding globulin OS=Homo sapiens GN=SERPINA6 PE=1 SV=1                   | CBG_HUMAN   | 45 kDa           | 8                         | 28%                 |
| 207 | Carboxypeptidase B2 OS=Homo sapiens GN=CPB2 PE=1 SV=2                                   | CBPB2_HUMAN | 48 kDa           | 5                         | 14%                 |
| 208 | Carboxypeptidase Z OS=Homo sapiens GN=CPZ PE=1 SV=2                                     | CBPZ_HUMAN  | 74 kDa           | 4                         | 8.10%               |
| 209 | Carbonyl reductase [NADPH] 1 OS=Homo sapiens GN=CBR1 PE=1 SV=3                          | CBR1_HUMAN  | 30 kDa           | 13                        | 56%                 |
| 210 | Cystathionine beta-synthase OS=Homo sapiens GN=CBS PE=1 SV=2                            | CBS_HUMAN   | 61 kDa           | 2                         | 3.80%               |
| 211 | Monocyte differentiation antigen CD14 OS=Homo sapiens GN=CD14 PE=1 SV=2                 | CD14_HUMAN  | 40 kDa           | 21                        | 69%                 |
| 212 | CD2-associated protein OS=Homo sapiens GN=CD2AP PE=1 SV=1                               | CD2AP_HUMAN | 71 kDa           | 2                         | 3.10%               |
| 213 | Platelet glycoprotein 4 OS=Homo sapiens GN=CD36 PE=1 SV=2                               | CD36_HUMAN  | 53 kDa           | 12                        | 29%                 |
| 214 | Leukocyte surface antigen CD47 OS=Homo sapiens GN=CD47 PE=1 SV=1                        | CD47_HUMAN  | 35 kDa           | 3                         | 8.70%               |
| 215 | CD59 glycoprotein OS=Homo sapiens GN=CD59 PE=1 SV=1                                     | CD59_HUMAN  | 14 kDa           | 5                         | 27%                 |
| 216 | CD5 antigen-like OS=Homo sapiens GN=CD5L PE=1 SV=1                                      | CD5L_HUMAN  | 38 kDa           | 3                         | 8.90%               |
| 217 | CD81 antigen OS=Homo sapiens GN=CD81 PE=1 SV=1                                          | CD81_HUMAN  | 26 kDa           | 4                         | 28%                 |
| 218 | CD9 antigen OS=Homo sapiens GN=CD9 PE=1 SV=4                                            | CD9_HUMAN   | 25 kDa           | 4                         | 18%                 |
| 219 | Hsp90 co-chaperone Cdc37 OS=Homo sapiens GN=CDC37 PE=1 SV=1                             | CDC37_HUMAN | 44 kDa           | 7                         | 20%                 |
| 220 | Cell division control protein 42 homolog OS=Homo sapiens GN=CDC42 PE=1 SV=2             | CDC42_HUMAN | 21 kDa           | 6                         | 44%                 |
| 221 | Protein CDV3 homolog OS=Homo sapiens GN=CDV3 PE=1 SV=1                                  | CDV3_HUMAN  | 27 kDa           | 4                         | 34%                 |
| 222 | Bile salt-activated lipase OS=Homo sapiens GN=CEL PE=1 SV=3                             | CEL_HUMAN   | 79 kDa           | 37                        | 56%                 |
| 223 | Ceruloplasmin OS=Homo sapiens GN=CP PE=1 SV=1                                           | CERU_HUMAN  | 122 kDa          | 38                        | 44%                 |
| 224 | Uncharacterized protein C6orf15 OS=Homo sapiens GN=C6orf15 PE=2 SV=3                    | CF015_HUMAN | 34 kDa           | 6                         | 40%                 |
| 225 | Costars family protein C6orf115 OS=Homo sapiens GN=C6orf115 PE=1 SV=1                   | CF115_HUMAN | 9 kDa            | 4                         | 47%                 |
| 226 | UPF0364 protein C6orf211 OS=Homo sapiens GN=C6orf211 PE=1 SV=1                          | CF211_HUMAN | 51 kDa           | 5                         | 12%                 |
| 227 | Complement factor B OS=Homo sapiens GN=CFB PE=1 SV=2                                    | CFAB_HUMAN  | 86 kDa           | 29                        | 42%                 |
| 228 | Complement factor H OS=Homo sapiens GN=CFH PE=1 SV=4                                    | CFAH_HUMAN  | 139 kDa          | 25                        | 27%                 |
| 229 | Complement factor I OS=Homo sapiens GN=CFI PE=1 SV=2                                    | CFAI_HUMAN  | 66 kDa           | 15                        | 33%                 |
| 230 | Cystathionine gamma-lyase OS=Homo sapiens GN=CTH PE=1 SV=3                              | CGL_HUMAN   | 45 kDa           | 4                         | 15%                 |
| 231 | Cell growth regulator with EF hand domain protein 1 OS=Homo sapiens GN=CGREF1 PE=2 SV=2 | CGRE1_HUMAN | 32 kDa           | 4                         | 16%                 |
| 232 | 10 kDa heat shock protein, mitochondrial OS=Homo sapiens GN=HSPE1 PE=1 SV=2             | CH10_HUMAN  | 11 kDa           | 3                         | 31%                 |
| 233 | Chitinase-3-like protein 1 OS=Homo sapiens GN=CHI3L1 PE=1 SV=2                          | CH3L1_HUMAN | 43 kDa           | 14                        | 44%                 |
| 234 | Chitinase-3-like protein 2 OS=Homo sapiens GN=CHI3L2 PE=1 SV=1                          | CH3L2_HUMAN | 44 kDa           | 6                         | 22%                 |
| 235 | 60 kDa heat shock protein, mitochondrial OS=Homo sapiens GN=HSPD1 PE=1 SV=2             | CH60_HUMAN  | 61 kDa           | 3                         | 6.80%               |
| 236 | Chitinase domain-containing protein 1 OS=Homo sapiens GN=CHID1 PE=1 SV=1                | CHID1_HUMAN | 45 kDa           | 4                         | 13%                 |
| 237 | Charged multivesicular body protein 4b OS=Homo sapiens GN=CHMP4B PE=1 SV=1              | CHM4B_HUMAN | 25 kDa           | 6                         | 29%                 |

| #   | Proteins                                                                           | Uniprot ID  | Molecular Weight | Number of unique peptides | Percent of coverage |
|-----|------------------------------------------------------------------------------------|-------------|------------------|---------------------------|---------------------|
| 238 | Charged multivesicular body protein 3 OS=Homo sapiens GN=VPS24 PE=1 SV=3           | CHMP3_HUMAN | 25 kDa           | 2                         | 9.00%               |
| 239 | Calcium-regulated heat stable protein 1 OS=Homo sapiens GN=CARHSP1 PE=1 SV=2       | CHSP1_HUMAN | 16 kDa           | 4                         | 31%                 |
| 240 | Calcium and integrin-binding protein 1 OS=Homo sapiens GN=CIB1 PE=1 SV=4           | CIB1_HUMAN  | 22 kDa           | 6                         | 35%                 |
| 241 | Cell death activator CIDE-A OS=Homo sapiens GN=CIDEA PE=1 SV=1                     | CIDEA_HUMAN | 25 kDa           | 2                         | 10%                 |
| 242 | Cold-inducible RNA-binding protein OS=Homo sapiens GN=CIRBP PE=1 SV=1              | CIRBP_HUMAN | 19 kDa           | 2                         | 20%                 |
| 243 | Ester hydrolase C11orf54 OS=Homo sapiens GN=C11orf54 PE=1 SV=1                     | CK054_HUMAN | 35 kDa           | 2                         | 9.20%               |
| 244 | CDK5 regulatory subunit-associated protein 2 OS=Homo sapiens GN=CDK5RAP2 PE=1 SV=5 | CK5P2_HUMAN | 215 kDa          | 2                         | 0.85%               |
| 245 | UPF0444 transmembrane protein C12orf23 OS=Homo sapiens GN=C12orf23 PE=1 SV=1       | CL023_HUMAN | 12 kDa           | 3                         | 35%                 |
| 246 | Clathrin heavy chain 1 OS=Homo sapiens GN=CLTC PE=1 SV=5                           | CLH1_HUMAN  | 192 kDa          | 3                         | 2.50%               |
| 247 | Chloride intracellular channel protein 1 OS=Homo sapiens GN=CLIC1 PE=1 SV=4        | CLIC1_HUMAN | 27 kDa           | 13                        | 74%                 |
| 248 | Chloride intracellular channel protein 4 OS=Homo sapiens GN=CLIC4 PE=1 SV=4        | CLIC4_HUMAN | 29 kDa           | 3                         | 15%                 |
| 249 | Ceroid-lipofuscinosis neuronal protein 5 OS=Homo sapiens GN=CLN5 PE=1 SV=2         | CLN5_HUMAN  | 41 kDa           | 5                         | 13%                 |
| 250 | Clusterin OS=Homo sapiens GN=CLU PE=1 SV=1                                         | CLUS_HUMAN  | 52 kDa           | 24                        | 45%                 |
| 251 | Carboxymethylenebutenolidase homolog OS=Homo sapiens GN=CMBL PE=1 SV=1             | CMBL_HUMAN  | 28 kDa           | 3                         | 10%                 |
| 252 | UPF0568 protein C14orf166 OS=Homo sapiens GN=C14orf166 PE=1 SV=1                   | CN166_HUMAN | 28 kDa           | 2                         | 12%                 |
| 253 | 2',3'-cyclic-nucleotide 3'-phosphodiesterase OS=Homo sapiens GN=CNP PE=1 SV=2      | CN37_HUMAN  | 48 kDa           | 3                         | 6.20%               |
| 254 | Cellular nucleic acid-binding protein OS=Homo sapiens GN=CNBP PE=1 SV=1            | CNBP_HUMAN  | 19 kDa           | 4                         | 22%                 |
| 255 | Cytosolic non-specific dipeptidase OS=Homo sapiens GN=CNDP2 PE=1 SV=2              | CNDP2_HUMAN | 53 kDa           | 28                        | 66%                 |
| 256 | Calponin-2 OS=Homo sapiens GN=CNN2 PE=1 SV=4                                       | CNN2_HUMAN  | 34 kDa           | 3                         | 11%                 |
| 257 | Protein canopy homolog 2 OS=Homo sapiens GN=CNPY2 PE=1 SV=1                        | CNPY2_HUMAN | 21 kDa           | 3                         | 19%                 |
| 258 | UPF0552 protein C15orf38 OS=Homo sapiens GN=C15orf38 PE=1 SV=1                     | CO038_HUMAN | 25 kDa           | 2                         | 9.30%               |
| 259 | Complement C2 OS=Homo sapiens GN=C2 PE=1 SV=2                                      | CO2_HUMAN   | 83 kDa           | 12                        | 19%                 |
| 260 | Complement C3 OS=Homo sapiens GN=C3 PE=1 SV=2                                      | CO3_HUMAN   | 187 kDa          | 116                       | 78%                 |
| 261 | Complement C4-A OS=Homo sapiens GN=C4A PE=1 SV=1                                   | CO4A_HUMAN  | 193 kDa          | 85                        | 59%                 |
| 262 | Complement C4-B OS=Homo sapiens GN=C4B PE=1 SV=1                                   | CO4B_HUMAN  | 193 kDa          | 2                         | 59%                 |
| 263 | Complement C5 OS=Homo sapiens GN=C5 PE=1 SV=4                                      | CO5_HUMAN   | 188 kDa          | 14                        | 10%                 |
| 264 | Complement component C6 OS=Homo sapiens GN=C6 PE=1 SV=3                            | CO6_HUMAN   | 105 kDa          | 9                         | 11%                 |
| 265 | Complement component C7 OS=Homo sapiens GN=C7 PE=1 SV=2                            | CO7_HUMAN   | 94 kDa           | 25                        | 41%                 |
| 266 | Complement component C8 alpha chain OS=Homo sapiens GN=C8A PE=1 SV=2               | CO8A_HUMAN  | 65 kDa           | 6                         | 12%                 |
| 267 | Complement component C8 beta chain OS=Homo sapiens GN=C8B PE=1 SV=3                | CO8B_HUMAN  | 67 kDa           | 6                         | 13%                 |
| 268 | Complement component C8 gamma chain OS=Homo sapiens GN=C8G PE=1 SV=3               | CO8G_HUMAN  | 22 kDa           | 3                         | 16%                 |
| 269 | Complement component C9 OS=Homo sapiens GN=C9 PE=1 SV=2                            | CO9_HUMAN   | 63 kDa           | 21                        | 38%                 |
| 270 | Bifunctional coenzyme A synthase OS=Homo sapiens GN=COASY PE=1 SV=4                | COASY_HUMAN | 62 kDa           | 5                         | 12%                 |
| 271 | Cochlin OS=Homo sapiens GN=COCH PE=1 SV=1                                          | COCH_HUMAN  | 59 kDa           | 10                        | 19%                 |
| 272 | Cofilin-1 OS=Homo sapiens GN=CFL1 PE=1 SV=3                                        | COF1_HUMAN  | 19 kDa           | 12                        | 69%                 |
| 273 | Catechol O-methyltransferase OS=Homo sapiens GN=COMT PE=1 SV=2                     | COMT_HUMAN  | 30 kDa           | 9                         | 39%                 |
| 274 | Coatomer subunit alpha OS=Homo sapiens GN=COPA PE=1 SV=2                           | COPA_HUMAN  | 138 kDa          | 4                         | 2.70%               |
| 275 | Coatomer subunit beta OS=Homo sapiens GN=COPB1 PE=1 SV=3                           | COPB_HUMAN  | 107 kDa          | 2                         | 2.30%               |
| 276 | Coatomer subunit beta' OS=Homo sapiens GN=COPB2 PE=1 SV=2                          | COPB2_HUMAN | 102 kDa          | 2                         | 2.30%               |

| #   | Proteins                                                                                                    | Uniprot ID  | Molecular Weight | Number of unique peptides | Percent of coverage |
|-----|-------------------------------------------------------------------------------------------------------------|-------------|------------------|---------------------------|---------------------|
| 277 | Coatomer subunit delta OS=Homo sapiens GN=ARCN1 PE=1 SV=1                                                   | COPD_HUMAN  | 57 kDa           | 7                         | 15%                 |
| 278 | Coatomer subunit gamma OS=Homo sapiens GN=COPG PE=1 SV=1                                                    | COPG_HUMAN  | 98 kDa           | 3                         | 4.50%               |
| 279 | Coronin-1A OS=Homo sapiens GN=CORO1A PE=1 SV=4                                                              | COR1A_HUMAN | 51 kDa           | 2                         | 6.70%               |
| 280 | Coronin-1B OS=Homo sapiens GN=CORO1B PE=1 SV=1                                                              | COR1B_HUMAN | 54 kDa           | 8                         | 24%                 |
| 281 | Coactosin-like protein OS=Homo sapiens GN=COTL1 PE=1 SV=3                                                   | COTL1_HUMAN | 16 kDa           | 3                         | 25%                 |
| 282 | UPF0764 protein C16orf89 OS=Homo sapiens GN=C16orf89 PE=2 SV=2                                              | CP089_HUMAN | 45 kDa           | 5                         | 16%                 |
| 283 | Carboxypeptidase N subunit 2 OS=Homo sapiens GN=CPN2 PE=1 SV=3                                              | CPN2_HUMAN  | 61 kDa           | 2                         | 4.60%               |
| 284 | Calpain small subunit 1 OS=Homo sapiens GN=CAPNS1 PE=1 SV=1                                                 | CPNS1_HUMAN | 28 kDa           | 3                         | 14%                 |
| 285 | Protein C17orf37 OS=Homo sapiens GN=C17orf37 PE=1 SV=1                                                      | CQ037_HUMAN | 12 kDa           | 2                         | 16%                 |
| 286 | Chordin-like protein 2 OS=Homo sapiens GN=CHRD2 PE=1 SV=1                                                   | CRDL2_HUMAN | 47 kDa           | 21                        | 60%                 |
| 287 | Cysteine-rich motor neuron 1 protein OS=Homo sapiens GN=CRIM1 PE=1 SV=1                                     | CRIM1_HUMAN | 114 kDa          | 8                         | 12%                 |
| 288 | Crk-like protein OS=Homo sapiens GN=CRKL PE=1 SV=1                                                          | CRKL_HUMAN  | 34 kDa           | 2                         | 6.90%               |
| 289 | C-reactive protein OS=Homo sapiens GN=CRP PE=1 SV=1                                                         | CRP_HUMAN   | 25 kDa           | 2                         | 9.80%               |
| 290 | Lambda-crystallin homolog OS=Homo sapiens GN=CRYL1 PE=1 SV=3                                                | CRYL1_HUMAN | 35 kDa           | 7                         | 21%                 |
| 291 | UPF0556 protein C19orf10 OS=Homo sapiens GN=C19orf10 PE=1 SV=1                                              | CS010_HUMAN | 19 kDa           | 3                         | 21%                 |
| 292 | Cold shock domain-containing protein E1 OS=Homo sapiens GN=CSDE1 PE=1 SV=2                                  | CSDE1_HUMAN | 89 kDa           | 3                         | 2.60%               |
| 293 | Macrophage colony-stimulating factor 1 OS=Homo sapiens GN=CSF1 PE=1 SV=2                                    | CSF1_HUMAN  | 60 kDa           | 7                         | 16%                 |
| 294 | Granulocyte-macrophage colony-stimulating factor receptor subunit alpha OS=Homo sapiens GN=CSF2RA PE=1 SV=1 | CSF2R_HUMAN | 46 kDa           | 2                         | 6.20%               |
| 295 | COP9 signalosome complex subunit 1 OS=Homo sapiens GN=GPS1 PE=1 SV=4                                        | CSN1_HUMAN  | 56 kDa           | 2                         | 4.30%               |
| 296 | COP9 signalosome complex subunit 2 OS=Homo sapiens GN=COPS2 PE=1 SV=1                                       | CSN2_HUMAN  | 52 kDa           | 3                         | 7.70%               |
| 297 | COP9 signalosome complex subunit 3 OS=Homo sapiens GN=COPS3 PE=1 SV=3                                       | CSN3_HUMAN  | 48 kDa           | 2                         | 5.40%               |
| 298 | COP9 signalosome complex subunit 4 OS=Homo sapiens GN=COPS4 PE=1 SV=1                                       | CSN4_HUMAN  | 46 kDa           | 4                         | 15%                 |
| 299 | COP9 signalosome complex subunit 5 OS=Homo sapiens GN=COPS5 PE=1 SV=4                                       | CSN5_HUMAN  | 38 kDa           | 3                         | 9.90%               |
| 300 | Cysteine and glycine-rich protein 1 OS=Homo sapiens GN=CSRP1 PE=1 SV=3                                      | CSRP1_HUMAN | 21 kDa           | 4                         | 33%                 |
| 301 | Calsynenin-1 OS=Homo sapiens GN=CLSTN1 PE=1 SV=1                                                            | CSTN1_HUMAN | 110 kDa          | 4                         | 5.30%               |
| 302 | Cullin-4A OS=Homo sapiens GN=CUL4A PE=1 SV=3                                                                | CUL4A_HUMAN | 88 kDa           | 2                         | 2.50%               |
| 303 | Protein CutA OS=Homo sapiens GN=CUTA PE=1 SV=2                                                              | CUTA_HUMAN  | 19 kDa           | 3                         | 31%                 |
| 304 | UPF0368 protein Cxorf26 OS=Homo sapiens GN=CXorf26 PE=1 SV=1                                                | CX026_HUMAN | 26 kDa           | 2                         | 9.00%               |
| 305 | C-X-C motif chemokine 2 OS=Homo sapiens GN=CXCL2 PE=1 SV=1                                                  | CXCL2_HUMAN | 11 kDa           | 5                         | 47%                 |
| 306 | Cytochrome b5 OS=Homo sapiens GN=CYB5A PE=1 SV=2                                                            | CYB5_HUMAN  | 15 kDa           | 4                         | 34%                 |
| 307 | Cytochrome b reductase 1 OS=Homo sapiens GN=CYBRD1 PE=1 SV=1                                                | CYBR1_HUMAN | 32 kDa           | 3                         | 12%                 |
| 308 | Cytoplasmic FMR1-interacting protein 1 OS=Homo sapiens GN=CYFIP1 PE=1 SV=1                                  | CYFP1_HUMAN | 145 kDa          | 5                         | 4.50%               |
| 309 | Cystatin-B OS=Homo sapiens GN=CSTB PE=1 SV=2                                                                | CYTB_HUMAN  | 11 kDa           | 5                         | 78%                 |
| 310 | Cystatin-C OS=Homo sapiens GN=CST3 PE=1 SV=1                                                                | CYTC_HUMAN  | 16 kDa           | 11                        | 67%                 |
| 311 | Disabled homolog 2 OS=Homo sapiens GN=DAB2 PE=1 SV=3                                                        | DAB2_HUMAN  | 82 kDa           | 7                         | 11%                 |
| 312 | Dystroglycan OS=Homo sapiens GN=DAG1 PE=1 SV=2                                                              | DAG1_HUMAN  | 97 kDa           | 13                        | 23%                 |
| 313 | Drebrin-like protein OS=Homo sapiens GN=DBNL PE=1 SV=1                                                      | DBNL_HUMAN  | 48 kDa           | 5                         | 13%                 |
| 314 | DNA-binding protein A OS=Homo sapiens GN=CSDA PE=1 SV=4                                                     | DBPA_HUMAN  | 40 kDa           | 3                         | 16%                 |
| 315 | Deoxycytidylate deaminase OS=Homo sapiens GN=DCTD PE=1 SV=2                                                 | DCTD_HUMAN  | 20 kDa           | 3                         | 21%                 |
| 316 | Dynactin subunit 1 OS=Homo sapiens GN=DCTN1 PE=1 SV=3                                                       | DCTN1_HUMAN | 142 kDa          | 2                         | 2.00%               |
| 317 | Dynactin subunit 2 OS=Homo sapiens GN=DCTN2 PE=1 SV=4                                                       | DCTN2_HUMAN | 44 kDa           | 6                         | 16%                 |



| #   | Proteins                                                                                                      | Uniprot ID      | Molecular Weight | Number of unique peptides | Percent of coverage |
|-----|---------------------------------------------------------------------------------------------------------------|-----------------|------------------|---------------------------|---------------------|
| 318 | L-xylulose reductase OS=Homo sapiens GN=DCXR PE=1 SV=2                                                        | DCXR_HUMAN      | 26 kDa           | 14                        | 81%                 |
| 319 | N(G),N(G)-dimethylarginine dimethylaminohydrolase 1 OS=Homo sapiens GN=DDAH1 PE=1 SV=3                        | DDAH1_HUMAN     | 31 kDa           | 16                        | 67%                 |
| 320 | N(G),N(G)-dimethylarginine dimethylaminohydrolase 2 OS=Homo sapiens GN=DDAH2 PE=1 SV=1                        | DDAH2_HUMAN     | 30 kDa           | 5                         | 22%                 |
| 321 | DNA damage-binding protein 1 OS=Homo sapiens GN=DDB1 PE=1 SV=1                                                | DDB1_HUMAN      | 127 kDa          | 5                         | 4.10%               |
| 322 | Epithelial discoidin domain-containing receptor 1 OS=Homo sapiens GN=DDR1 PE=1 SV=1                           | DDR1_HUMAN      | 101 kDa          | 14                        | 16%                 |
| 323 | ATP-dependent RNA helicase DDX3X OS=Homo sapiens GN=DDX3X PE=1 SV=3                                           | DDX3X_HUMAN     | 73 kDa           | 5                         | 8.20%               |
| 324 | Probable ATP-dependent RNA helicase DDX6 OS=Homo sapiens GN=DDX6 PE=1 SV=2                                    | DDX6_HUMAN      | 54 kDa           | 2                         | 3.70%               |
| 325 | Neutrophil defensin 1 OS=Homo sapiens GN=DEFA1 PE=1 SV=1                                                      | DEF1_HUMAN (+1) | 10 kDa           | 2                         | 16%                 |
| 326 | Density-regulated protein OS=Homo sapiens GN=DENR PE=1 SV=2                                                   | DENR_HUMAN      | 22 kDa           | 5                         | 30%                 |
| 327 | Dextrin OS=Homo sapiens GN=DSTN PE=1 SV=3                                                                     | DEST_HUMAN      | 19 kDa           | 9                         | 58%                 |
| 328 | Bifunctional ATP-dependent dihydroxyacetone kinase/FAD-AMP lyase (cyclizing) OS=Homo sapiens GN=DAK PE=1 SV=2 | DHAK_HUMAN      | 59 kDa           | 13                        | 32%                 |
| 329 | Peroxisomal multifunctional enzyme type 2 OS=Homo sapiens GN=HSD17B4 PE=1 SV=3                                | DHB4_HUMAN      | 80 kDa           | 3                         | 5.40%               |
| 330 | Dihydropteridine reductase OS=Homo sapiens GN=QDPR PE=1 SV=2                                                  | DHPR_HUMAN      | 26 kDa           | 5                         | 28%                 |
| 331 | Di-N-acetylchitobiase OS=Homo sapiens GN=CTBS PE=1 SV=1                                                       | DIAC_HUMAN      | 44 kDa           | 8                         | 23%                 |
| 332 | Protein diaphanous homolog 1 OS=Homo sapiens GN=DIAPH1 PE=1 SV=2                                              | DIAP1_HUMAN     | 141 kDa          | 4                         | 3.00%               |
| 333 | Disks large-associated protein 4 OS=Homo sapiens GN=DLGAP4 PE=1 SV=3                                          | DLGP4_HUMAN     | 108 kDa          | 2                         | 3.10%               |
| 334 | Delta and Notch-like epidermal growth factor-related receptor OS=Homo sapiens GN=DNER PE=1 SV=1               | DNER_HUMAN      | 78 kDa           | 2                         | 4.60%               |
| 335 | DnaJ homolog subfamily B member 2 OS=Homo sapiens GN=DNAJB2 PE=2 SV=3                                         | DNJB2_HUMAN     | 36 kDa           | 3                         | 12%                 |
| 336 | DnaJ homolog subfamily C member 3 OS=Homo sapiens GN=DNAJC3 PE=1 SV=1                                         | DNJC3_HUMAN     | 58 kDa           | 7                         | 16%                 |
| 337 | DNA ligase 1 OS=Homo sapiens GN=LIG1 PE=1 SV=1                                                                | DNL1_HUMAN      | 102 kDa          | 2                         | 2.00%               |
| 338 | Deoxyribonuclease-2-alpha OS=Homo sapiens GN=DNASE2 PE=1 SV=2                                                 | DNS2A_HUMAN     | 40 kDa           | 5                         | 15%                 |
| 339 | D-dopachrome decarboxylase OS=Homo sapiens GN=DDT PE=1 SV=3                                                   | DOPD_HUMAN      | 13 kDa           | 4                         | 36%                 |
| 340 | HLA class II histocompatibility antigen, DP alpha 1 chain OS=Homo sapiens GN=HLA-DPA1 PE=1 SV=1               | DPA1_HUMAN      | 29 kDa           | 2                         | 11%                 |
| 341 | Dolichol-phosphate mannosyltransferase subunit 3 OS=Homo sapiens GN=DPM3 PE=1 SV=2                            | DPM3_HUMAN      | 10 kDa           | 2                         | 24%                 |
| 342 | Dipeptidyl peptidase 2 OS=Homo sapiens GN=DPP7 PE=1 SV=3                                                      | DPP2_HUMAN      | 54 kDa           | 11                        | 27%                 |
| 343 | Dipeptidyl peptidase 3 OS=Homo sapiens GN=DPP3 PE=1 SV=2                                                      | DPP3_HUMAN      | 83 kDa           | 11                        | 20%                 |
| 344 | Dihydropyrimidinase-related protein 2 OS=Homo sapiens GN=DPYSL2 PE=1 SV=1                                     | DPYL2_HUMAN     | 62 kDa           | 25                        | 64%                 |
| 345 | Dihydropyrimidinase-related protein 3 OS=Homo sapiens GN=DPYSL3 PE=1 SV=1                                     | DPYL3_HUMAN     | 62 kDa           | 18                        | 57%                 |
| 346 | HLA class II histocompatibility antigen, DR alpha chain OS=Homo sapiens GN=HLA-DRA PE=1 SV=1                  | DRA_HUMAN       | 29 kDa           | 4                         | 21%                 |
| 347 | Developmentally-regulated GTP-binding protein 1 OS=Homo sapiens GN=DRG1 PE=1 SV=1                             | DRG1_HUMAN      | 41 kDa           | 2                         | 6.80%               |
| 348 | Developmentally-regulated GTP-binding protein 2 OS=Homo sapiens GN=DRG2 PE=1 SV=1                             | DRG2_HUMAN      | 41 kDa           | 2                         | 5.80%               |
| 349 | Desmocollin-2 OS=Homo sapiens GN=DSC2 PE=1 SV=1                                                               | DSC2_HUMAN      | 100 kDa          | 6                         | 6.40%               |
| 350 | Cytoplasmic dynein 1 heavy chain 1 OS=Homo sapiens GN=DYNC1H1 PE=1 SV=5                                       | DYHC1_HUMAN     | 532 kDa          | 35                        | 9.00%               |
| 351 | Dynein light chain 2, cytoplasmic OS=Homo sapiens GN=DYNLL2 PE=1 SV=1                                         | DYL2_HUMAN      | 10 kDa           | 2                         | 33%                 |
| 352 | Delta(3,5)-Delta(2,4)-dienoyl-CoA isomerase, mitochondrial OS=Homo sapiens GN=ECH1 PE=1 SV=2                  | ECH1_HUMAN      | 36 kDa           | 2                         | 7.30%               |
| 353 | Enoyl-CoA hydratase domain-containing protein 1 OS=Homo sapiens GN=ECHDC1 PE=1 SV=2                           | ECHD1_HUMAN     | 34 kDa           | 2                         | 10%                 |
| 354 | Extracellular matrix protein 1 OS=Homo sapiens GN=ECM1 PE=1 SV=2                                              | ECM1_HUMAN      | 61 kDa           | 4                         | 8.10%               |
| 355 | Extracellular matrix protein 2 OS=Homo sapiens GN=ECM2 PE=2 SV=1                                              | ECM2_HUMAN      | 80 kDa           | 2                         | 3.40%               |

| #   | Proteins                                                                                               | Uniprot ID       | Molecular Weight | Number of unique peptides | Percent of coverage |
|-----|--------------------------------------------------------------------------------------------------------|------------------|------------------|---------------------------|---------------------|
| 356 | Proteasome-associated protein ECM29 homolog OS=Homo sapiens GN=ECM29 PE=1 SV=2                         | ECM29_HUMAN      | 204 kDa          | 2                         | 1.30%               |
| 357 | Early endosome antigen 1 OS=Homo sapiens GN=EEA1 PE=1 SV=2                                             | EEA1_HUMAN       | 162 kDa          | 3                         | 1.40%               |
| 358 | Elongation factor 1-alpha 1 OS=Homo sapiens GN=EEF1A1 PE=1 SV=1                                        | EF1A1_HUMAN (+1) | 50 kDa           | 18                        | 48%                 |
| 359 | Elongation factor 1-beta OS=Homo sapiens GN=EEF1B2 PE=1 SV=3                                           | EF1B_HUMAN       | 25 kDa           | 6                         | 33%                 |
| 360 | Elongation factor 1-delta OS=Homo sapiens GN=EEF1D PE=1 SV=5                                           | EF1D_HUMAN       | 31 kDa           | 10                        | 47%                 |
| 361 | Elongation factor 1-gamma OS=Homo sapiens GN=EEF1G PE=1 SV=3                                           | EF1G_HUMAN       | 50 kDa           | 12                        | 24%                 |
| 362 | Elongation factor 2 OS=Homo sapiens GN=EEF2 PE=1 SV=4                                                  | EF2_HUMAN        | 95 kDa           | 39                        | 54%                 |
| 363 | EF-hand domain-containing protein D1 OS=Homo sapiens GN=EFHD1 PE=1 SV=1                                | EFHD1_HUMAN      | 27 kDa           | 13                        | 67%                 |
| 364 | EF-hand domain-containing protein D2 OS=Homo sapiens GN=EFHD2 PE=1 SV=1                                | EFHD2_HUMAN      | 27 kDa           | 2                         | 18%                 |
| 365 | Pro-epidermal growth factor OS=Homo sapiens GN=EGF PE=1 SV=2                                           | EGF_HUMAN        | 134 kDa          | 27                        | 25%                 |
| 366 | Endoglin OS=Homo sapiens GN=ENG PE=1 SV=2                                                              | EGLN_HUMAN       | 71 kDa           | 3                         | 5.00%               |
| 367 | EH domain-containing protein 4 OS=Homo sapiens GN=EHD4 PE=1 SV=1                                       | EHD4_HUMAN       | 61 kDa           | 9                         | 18%                 |
| 368 | Translation initiation factor eIF-2B subunit epsilon OS=Homo sapiens GN=EIF2B5 PE=1 SV=3               | EI2BE_HUMAN      | 80 kDa           | 2                         | 3.10%               |
| 369 | Eukaryotic translation initiation factor 1 OS=Homo sapiens GN=EIF1 PE=1 SV=1                           | EIF1_HUMAN       | 13 kDa           | 4                         | 61%                 |
| 370 | Eukaryotic translation initiation factor 2A OS=Homo sapiens GN=EIF2A PE=1 SV=3                         | EIF2A_HUMAN      | 65 kDa           | 2                         | 4.80%               |
| 371 | Eukaryotic translation initiation factor 3 subunit A OS=Homo sapiens GN=EIF3A PE=1 SV=1                | EIF3A_HUMAN      | 167 kDa          | 2                         | 1.90%               |
| 372 | Eukaryotic translation initiation factor 3 subunit C OS=Homo sapiens GN=EIF3C PE=1 SV=1                | EIF3C_HUMAN      | 105 kDa          | 2                         | 2.80%               |
| 373 | Eukaryotic translation initiation factor 3 subunit F OS=Homo sapiens GN=EIF3F PE=1 SV=1                | EIF3F_HUMAN      | 38 kDa           | 3                         | 9.00%               |
| 374 | Eukaryotic translation initiation factor 3 subunit H OS=Homo sapiens GN=EIF3H PE=1 SV=1                | EIF3H_HUMAN      | 40 kDa           | 2                         | 8.80%               |
| 375 | Eukaryotic translation initiation factor 3 subunit I OS=Homo sapiens GN=EIF3I PE=1 SV=1                | EIF3I_HUMAN      | 37 kDa           | 3                         | 9.20%               |
| 376 | Eukaryotic translation initiation factor 3 subunit J OS=Homo sapiens GN=EIF3J PE=1 SV=2                | EIF3J_HUMAN      | 29 kDa           | 3                         | 19%                 |
| 377 | Eukaryotic translation initiation factor 3 subunit L OS=Homo sapiens GN=EIF3L PE=1 SV=1                | EIF3L_HUMAN      | 67 kDa           | 2                         | 3.00%               |
| 378 | Transcription elongation factor B polypeptide 1 OS=Homo sapiens GN=TCEB1 PE=1 SV=1                     | ELOC_HUMAN       | 12 kDa           | 2                         | 17%                 |
| 379 | Echinoderm microtubule-associated protein-like 2 OS=Homo sapiens GN=EML2 PE=1 SV=1                     | EMAL2_HUMAN      | 71 kDa           | 7                         | 13%                 |
| 380 | Alpha-enolase OS=Homo sapiens GN=ENO1 PE=1 SV=2                                                        | ENOA_HUMAN       | 47 kDa           | 30                        | 78%                 |
| 381 | Mitochondrial enolase superfamily member 1 OS=Homo sapiens GN=ENOSF1 PE=1 SV=1                         | ENOF1_HUMAN      | 50 kDa           | 3                         | 11%                 |
| 382 | Enolase-phosphatase E1 OS=Homo sapiens GN=ENOPH1 PE=1 SV=1                                             | ENOPH_HUMAN      | 29 kDa           | 4                         | 28%                 |
| 383 | Endoplasmic reticulum protein OS=Homo sapiens GN=HSP90B1 PE=1 SV=1                                     | ENPL_HUMAN       | 92 kDa           | 22                        | 26%                 |
| 384 | Alpha-endosulfine OS=Homo sapiens GN=ENSA PE=1 SV=1                                                    | ENSA_HUMAN       | 13 kDa           | 4                         | 29%                 |
| 385 | Ectonucleoside triphosphate diphosphohydrolase 3 OS=Homo sapiens GN=ENTPD3 PE=1 SV=2                   | ENTP3_HUMAN      | 59 kDa           | 5                         | 11%                 |
| 386 | Ephrin type-A receptor 7 OS=Homo sapiens GN=EPHA7 PE=1 SV=3                                            | EPHA7_HUMAN      | 112 kDa          | 10                        | 13%                 |
| 387 | Epiplakin OS=Homo sapiens GN=EPPK1 PE=1 SV=2                                                           | EPIPL_HUMAN      | 556 kDa          | 2                         | 0.90%               |
| 388 | Endoplasmic reticulum aminopeptidase 1 OS=Homo sapiens GN=ERAP1 PE=1 SV=3                              | ERAP1_HUMAN      | 107 kDa          | 15                        | 19%                 |
| 389 | Eukaryotic peptide chain release factor GTP-binding subunit ERF3A OS=Homo sapiens GN=GSPT1 PE=1 SV=1   | ERF3A_HUMAN      | 56 kDa           | 6                         | 14%                 |
| 390 | Lanosterol synthase OS=Homo sapiens GN=LSS PE=1 SV=1                                                   | ERG7_HUMAN       | 83 kDa           | 8                         | 12%                 |
| 391 | Endoplasmic reticulum resident protein 29 OS=Homo sapiens GN=ERP29 PE=1 SV=4                           | ERP29_HUMAN      | 29 kDa           | 4                         | 16%                 |
| 392 | Endoplasmic reticulum resident protein 44 OS=Homo sapiens GN=ERP44 PE=1 SV=1                           | ERP44_HUMAN      | 47 kDa           | 2                         | 10%                 |
| 393 | Epidermal growth factor receptor kinase substrate 8-like protein 2 OS=Homo sapiens GN=EPS8L2 PE=1 SV=2 | ES8L2_HUMAN      | 81 kDa           | 4                         | 11%                 |

| #   | Proteins                                                                                                     | Uniprot ID  | Molecular Weight | Number of unique peptides | Percent of coverage |
|-----|--------------------------------------------------------------------------------------------------------------|-------------|------------------|---------------------------|---------------------|
| 394 | Carboxylesterase 3 OS=Homo sapiens GN=CES3 PE=1 SV=1                                                         | EST3_HUMAN  | 62 kDa           | 3                         | 8.20%               |
| 395 | Carboxylesterase 4A OS=Homo sapiens GN=CES4A PE=2 SV=2                                                       | EST4A_HUMAN | 64 kDa           | 2                         | 3.90%               |
| 396 | S-formylglutathione hydrolase OS=Homo sapiens GN=ESD PE=1 SV=2                                               | ESTD_HUMAN  | 31 kDa           | 9                         | 43%                 |
| 397 | Ellis-van Creveld syndrome protein OS=Homo sapiens GN=EVC PE=1 SV=1                                          | EVC_HUMAN   | 112 kDa          | 2                         | 2.60%               |
| 398 | Ezrin OS=Homo sapiens GN=EZR PE=1 SV=4                                                                       | EZRI_HUMAN  | 69 kDa           | 26                        | 54%                 |
| 399 | Protein FAM107B OS=Homo sapiens GN=FAM107B PE=1 SV=1                                                         | F107B_HUMAN | 16 kDa           | 8                         | 51%                 |
| 400 | Hsc70-interacting protein OS=Homo sapiens GN=ST13 PE=1 SV=2                                                  | F10A1_HUMAN | 41 kDa           | 8                         | 24%                 |
| 401 | Fructose-1,6-bisphosphatase 1 OS=Homo sapiens GN=FBP1 PE=1 SV=5                                              | F16P1_HUMAN | 37 kDa           | 15                        | 54%                 |
| 402 | Coagulation factor XII OS=Homo sapiens GN=F12 PE=1 SV=3                                                      | FA12_HUMAN  | 68 kDa           | 4                         | 8.60%               |
| 403 | Protein FAM20A OS=Homo sapiens GN=FAM20A PE=2 SV=4                                                           | FA20A_HUMAN | 61 kDa           | 2                         | 6.70%               |
| 404 | Protein FAM83F OS=Homo sapiens GN=FAM83F PE=2 SV=1                                                           | FA83F_HUMAN | 55 kDa           | 2                         | 7.20%               |
| 405 | Fumarylacetoacetase OS=Homo sapiens GN=FAH PE=1 SV=2                                                         | FAAA_HUMAN  | 46 kDa           | 8                         | 22%                 |
| 406 | Fatty acid-binding protein, brain OS=Homo sapiens GN=FABP7 PE=1 SV=3                                         | FABP7_HUMAN | 15 kDa           | 7                         | 58%                 |
| 407 | Fatty acid-binding protein, heart OS=Homo sapiens GN=FABP3 PE=1 SV=4                                         | FABPH_HUMAN | 15 kDa           | 16                        | 81%                 |
| 408 | Protein FAM3B OS=Homo sapiens GN=FAM3B PE=1 SV=2                                                             | FAM3B_HUMAN | 26 kDa           | 8                         | 39%                 |
| 409 | Protein FAM3C OS=Homo sapiens GN=FAM3C PE=1 SV=1                                                             | FAM3C_HUMAN | 25 kDa           | 8                         | 34%                 |
| 410 | Fatty acid synthase OS=Homo sapiens GN=FASN PE=1 SV=3                                                        | FAS_HUMAN   | 273 kDa          | 133                       | 73%                 |
| 411 | Protocadherin Fat 2 OS=Homo sapiens GN=FAT2 PE=1 SV=2                                                        | FAT2_HUMAN  | 479 kDa          | 31                        | 9.20%               |
| 412 | Fibulin-1 OS=Homo sapiens GN=FBLN1 PE=1 SV=4                                                                 | FBLN1_HUMAN | 77 kDa           | 2                         | 2.80%               |
| 413 | EGF-containing fibulin-like extracellular matrix protein 1 OS=Homo sapiens GN=EFEMP1 PE=1 SV=2               | FBLN3_HUMAN | 55 kDa           | 9                         | 29%                 |
| 414 | Fibulin-5 OS=Homo sapiens GN=FBLN5 PE=1 SV=1                                                                 | FBLN5_HUMAN | 50 kDa           | 2                         | 4.90%               |
| 415 | IgGfC-binding protein OS=Homo sapiens GN=FCGBP PE=1 SV=3                                                     | FCGBP_HUMAN | 572 kDa          | 9                         | 1.90%               |
| 416 | GDP-L-fucose synthase OS=Homo sapiens GN=TSTA3 PE=1 SV=1                                                     | FCL_HUMAN   | 36 kDa           | 7                         | 31%                 |
| 417 | Ficolin-2 OS=Homo sapiens GN=FCN2 PE=1 SV=2                                                                  | FCN2_HUMAN  | 34 kDa           | 4                         | 13%                 |
| 418 | Fermitin family homolog 2 OS=Homo sapiens GN=FERMT2 PE=1 SV=1                                                | FERM2_HUMAN | 78 kDa           | 5                         | 9.10%               |
| 419 | Alpha-2-HS-glycoprotein OS=Homo sapiens GN=AHSG PE=1 SV=1                                                    | FETUA_HUMAN | 39 kDa           | 15                        | 53%                 |
| 420 | Fibroblast growth factor-binding protein 1 OS=Homo sapiens GN=FGFBP1 PE=1 SV=1                               | FGFP1_HUMAN | 26 kDa           | 4                         | 25%                 |
| 421 | Complement factor H-related protein 1 OS=Homo sapiens GN=CFHR1 PE=1 SV=2                                     | FHR1_HUMAN  | 38 kDa           | 2                         | 9.70%               |
| 422 | Fibrinogen alpha chain OS=Homo sapiens GN=FGA PE=1 SV=2                                                      | FIBA_HUMAN  | 95 kDa           | 23                        | 30%                 |
| 423 | Fibrinogen beta chain OS=Homo sapiens GN=FGB PE=1 SV=2                                                       | FIBB_HUMAN  | 56 kDa           | 17                        | 48%                 |
| 424 | Fibrinogen gamma chain OS=Homo sapiens GN=FGG PE=1 SV=3                                                      | FIBG_HUMAN  | 52 kDa           | 14                        | 38%                 |
| 425 | Filaggrin OS=Homo sapiens GN=FLG PE=1 SV=3                                                                   | FILA_HUMAN  | 435 kDa          | 4                         | 1.50%               |
| 426 | Fibronectin OS=Homo sapiens GN=FN1 PE=1 SV=4                                                                 | FINC_HUMAN  | 263 kDa          | 49                        | 30%                 |
| 427 | Peptidyl-prolyl cis-trans isomerase FKBP1A OS=Homo sapiens GN=FKBP1A PE=1 SV=2                               | FKB1A_HUMAN | 12 kDa           | 2                         | 25%                 |
| 428 | Peptidyl-prolyl cis-trans isomerase FKBP3 OS=Homo sapiens GN=FKBP3 PE=1 SV=1                                 | FKBP3_HUMAN | 25 kDa           | 2                         | 10%                 |
| 429 | Peptidyl-prolyl cis-trans isomerase FKBP4 OS=Homo sapiens GN=FKBP4 PE=1 SV=3                                 | FKBP4_HUMAN | 52 kDa           | 16                        | 39%                 |
| 430 | Filamin-B OS=Homo sapiens GN=FLNB PE=1 SV=2                                                                  | FLNB_HUMAN  | 278 kDa          | 36                        | 19%                 |
| 431 | Protein farnesyltransferase/geranylgeranyltransferase type-1 subunit alpha OS=Homo sapiens GN=FNTA PE=1 SV=1 | FNTA_HUMAN  | 44 kDa           | 3                         | 7.70%               |
| 432 | Folate receptor alpha OS=Homo sapiens GN=FOLR1 PE=1 SV=3                                                     | FOLR1_HUMAN | 30 kDa           | 9                         | 43%                 |
| 433 | Farnesyl pyrophosphate synthase OS=Homo sapiens GN=FDPS PE=1 SV=4                                            | FPPS_HUMAN  | 48 kDa           | 6                         | 13%                 |
| 434 | FRAS1-related extracellular matrix protein 3 OS=Homo sapiens GN=FREM3 PE=2 SV=1                              | FREM3_HUMAN | 238 kDa          | 16                        | 9.20%               |

| #   | Proteins                                                                                              | Uniprot ID  | Molecular Weight | Number of unique peptides | Percent of coverage |
|-----|-------------------------------------------------------------------------------------------------------|-------------|------------------|---------------------------|---------------------|
| 435 | Ferritin heavy chain OS=Homo sapiens GN=FTH1 PE=1 SV=2                                                | FRIH_HUMAN  | 21 kDa           | 4                         | 23%                 |
| 436 | Fascin OS=Homo sapiens GN=FSCN1 PE=1 SV=3                                                             | FSCN1_HUMAN | 55 kDa           | 3                         | 7.10%               |
| 437 | Follistatin-related protein 1 OS=Homo sapiens GN=FSTL1 PE=1 SV=1                                      | FSTL1_HUMAN | 35 kDa           | 21                        | 65%                 |
| 438 | Tissue alpha-L-fucosidase OS=Homo sapiens GN=FUCA1 PE=1 SV=4                                          | FUCO_HUMAN  | 54 kDa           | 8                         | 19%                 |
| 439 | Plasma alpha-L-fucosidase OS=Homo sapiens GN=FUCA2 PE=1 SV=2                                          | FUCO2_HUMAN | 54 kDa           | 7                         | 15%                 |
| 440 | Fumarate hydratase, mitochondrial OS=Homo sapiens GN=FB PE=1 SV=3                                     | FUMH_HUMAN  | 55 kDa           | 3                         | 6.90%               |
| 441 | Alpha-(1,3)-fucosyltransferase OS=Homo sapiens GN=FUT6 PE=2 SV=1                                      | FUT6_HUMAN  | 42 kDa           | 8                         | 31%                 |
| 442 | G0/G1 switch regulatory protein 2 OS=Homo sapiens GN=G0S2 PE=1 SV=1                                   | G0S2_HUMAN  | 11 kDa           | 2                         | 27%                 |
| 443 | Glyceraldehyde-3-phosphate dehydrogenase OS=Homo sapiens GN=GAPDH PE=1 SV=3                           | G3P_HUMAN   | 36 kDa           | 20                        | 74%                 |
| 444 | Glucose-6-phosphate 1-dehydrogenase OS=Homo sapiens GN=G6PD PE=1 SV=4                                 | G6PD_HUMAN  | 59 kDa           | 8                         | 19%                 |
| 445 | Glucose-6-phosphate isomerase OS=Homo sapiens GN=GPI PE=1 SV=4                                        | G6PI_HUMAN  | 63 kDa           | 13                        | 31%                 |
| 446 | UDP-glucose 4-epimerase OS=Homo sapiens GN=GALE PE=1 SV=2                                             | GALE_HUMAN  | 38 kDa           | 10                        | 52%                 |
| 447 | Polypeptide N-acetylgalactosaminyltransferase 1 OS=Homo sapiens GN=GALNT1 PE=1 SV=1                   | GALT1_HUMAN | 64 kDa           | 2                         | 4.30%               |
| 448 | Polypeptide N-acetylgalactosaminyltransferase 2 OS=Homo sapiens GN=GALNT2 PE=1 SV=1                   | GALT2_HUMAN | 65 kDa           | 15                        | 32%                 |
| 449 | Polypeptide N-acetylgalactosaminyltransferase 3 OS=Homo sapiens GN=GALNT3 PE=2 SV=2                   | GALT3_HUMAN | 73 kDa           | 3                         | 7.30%               |
| 450 | Polypeptide N-acetylgalactosaminyltransferase 5 OS=Homo sapiens GN=GALNT5 PE=1 SV=1                   | GALT5_HUMAN | 106 kDa          | 2                         | 2.80%               |
| 451 | Neutral alpha-glucosidase AB OS=Homo sapiens GN=GANAB PE=1 SV=3                                       | GANAB_HUMAN | 107 kDa          | 21                        | 29%                 |
| 452 | Golgi-associated plant pathogenesis-related protein 1 OS=Homo sapiens GN=GLIPR2 PE=1 SV=3             | GAPR1_HUMAN | 17 kDa           | 6                         | 51%                 |
| 453 | Guanine nucleotide-binding protein G(I)/G(S)/G(T) subunit beta-1 OS=Homo sapiens GN=GNB1 PE=1 SV=3    | GBB1_HUMAN  | 37 kDa           | 2                         | 25%                 |
| 454 | Guanine nucleotide-binding protein G(I)/G(S)/G(T) subunit beta-2 OS=Homo sapiens GN=GNB2 PE=1 SV=3    | GBB2_HUMAN  | 37 kDa           | 8                         | 31%                 |
| 455 | Guanine nucleotide-binding protein subunit beta-4 OS=Homo sapiens GN=GNB4 PE=1 SV=3                   | GBB4_HUMAN  | 38 kDa           | 2                         | 21%                 |
| 456 | Guanine nucleotide-binding protein G(I)/G(S)/G(O) subunit gamma-12 OS=Homo sapiens GN=GNG12 PE=1 SV=3 | GBG12_HUMAN | 8 kDa            | 4                         | 56%                 |
| 457 | Guanine nucleotide-binding protein subunit beta-2-like 1 OS=Homo sapiens GN=GNB2L1 PE=1 SV=3          | GBLP_HUMAN  | 35 kDa           | 2                         | 6.30%               |
| 458 | Interferon-induced guanylate-binding protein 2 OS=Homo sapiens GN=GBP2 PE=2 SV=3                      | GBP2_HUMAN  | 67 kDa           | 2                         | 4.60%               |
| 459 | Translational activator GCN1 OS=Homo sapiens GN=GCN1L1 PE=1 SV=6                                      | GCN1L_HUMAN | 293 kDa          | 4                         | 1.60%               |
| 460 | Rab GDP dissociation inhibitor alpha OS=Homo sapiens GN=GDI1 PE=1 SV=2                                | GDIA_HUMAN  | 51 kDa           | 6                         | 38%                 |
| 461 | Rab GDP dissociation inhibitor beta OS=Homo sapiens GN=GDI2 PE=1 SV=2                                 | GDIB_HUMAN  | 51 kDa           | 30                        | 72%                 |
| 462 | Rho GDP-dissociation inhibitor 1 OS=Homo sapiens GN=ARHGDI1 PE=1 SV=3                                 | GDIR1_HUMAN | 23 kDa           | 6                         | 58%                 |
| 463 | Rho GDP-dissociation inhibitor 2 OS=Homo sapiens GN=ARHGDI2 PE=1 SV=3                                 | GDIR2_HUMAN | 23 kDa           | 2                         | 10.00%              |
| 464 | Gelsolin OS=Homo sapiens GN=GSN PE=1 SV=1                                                             | GELS_HUMAN  | 86 kDa           | 26                        | 42%                 |
| 465 | Gephyrin OS=Homo sapiens GN=GPHN PE=1 SV=1                                                            | GEPH_HUMAN  | 80 kDa           | 9                         | 16%                 |
| 466 | Glucosamine--fructose-6-phosphate aminotransferase [isomerizing] 1 OS=Homo sapiens GN=GFPT1 PE=1 SV=3 | GFPT1_HUMAN | 79 kDa           | 27                        | 41%                 |
| 467 | GTP cyclohydrolase 1 feedback regulatory protein OS=Homo sapiens GN=GCHFR PE=1 SV=3                   | GFRP_HUMAN  | 10 kDa           | 3                         | 40%                 |
| 468 | Gamma-glutamylcyclotransferase OS=Homo sapiens GN=GGCT PE=1 SV=1                                      | GGCT_HUMAN  | 21 kDa           | 5                         | 31%                 |
| 469 | Gamma-glutamyl hydrolase OS=Homo sapiens GN=GGH PE=1 SV=2                                             | GGH_HUMAN   | 36 kDa           | 4                         | 14%                 |
| 470 | Gamma-glutamyltranspeptidase 1 OS=Homo sapiens GN=GGT1 PE=1 SV=2                                      | GGT1_HUMAN  | 61 kDa           | 14                        | 25%                 |
| 471 | Gamma-glutamyltransferase 5 OS=Homo sapiens GN=GGT5 PE=1 SV=2                                         | GGT5_HUMAN  | 62 kDa           | 2                         | 4.60%               |
| 472 | Gamma-glutamyltransferase 6 OS=Homo sapiens GN=GGT6 PE=2 SV=2                                         | GGT6_HUMAN  | 51 kDa           | 3                         | 11%                 |
| 473 | Gamma-interferon-inducible lysosomal thiol reductase OS=Homo sapiens GN=IFI30 PE=1 SV=3               | GILT_HUMAN  | 28 kDa           | 2                         | 8.80%               |

| #   | Proteins                                                                                              | Uniprot ID       | Molecular Weight | Number of unique peptides | Percent of coverage |
|-----|-------------------------------------------------------------------------------------------------------|------------------|------------------|---------------------------|---------------------|
| 474 | PDZ domain-containing protein GIPC1 OS=Homo sapiens GN=GIPC1 PE=1 SV=2                                | GIPC1_HUMAN      | 36 kDa           | 5                         | 17%                 |
| 475 | Glucosylceramidase OS=Homo sapiens GN=GBA PE=1 SV=3                                                   | GLCM_HUMAN       | 60 kDa           | 8                         | 18%                 |
| 476 | 1,4-alpha-glucan-branching enzyme OS=Homo sapiens GN=GBE1 PE=1 SV=2                                   | GLGB_HUMAN       | 80 kDa           | 2                         | 2.70%               |
| 477 | Glutamine synthetase OS=Homo sapiens GN=GLUL PE=1 SV=4                                                | GLNA_HUMAN       | 42 kDa           | 4                         | 12%                 |
| 478 | Hydroxyacylglutathione hydrolase, mitochondrial OS=Homo sapiens GN=HAGH PE=1 SV=2                     | GLO2_HUMAN       | 34 kDa           | 4                         | 16%                 |
| 479 | Glyoxalase domain-containing protein 4 OS=Homo sapiens GN=GLOD4 PE=1 SV=1                             | GLOD4_HUMAN      | 35 kDa           | 8                         | 30%                 |
| 480 | Golgi phosphoprotein 3-like OS=Homo sapiens GN=GOLPH3L PE=1 SV=1                                      | GLP3L_HUMAN      | 33 kDa           | 3                         | 15%                 |
| 481 | Glycerol kinase OS=Homo sapiens GN=GK PE=1 SV=3                                                       | GLPK_HUMAN       | 61 kDa           | 5                         | 10%                 |
| 482 | Glutaredoxin-1 OS=Homo sapiens GN=GLRX PE=1 SV=2                                                      | GLRX1_HUMAN      | 12 kDa           | 8                         | 78%                 |
| 483 | Glutaredoxin-3 OS=Homo sapiens GN=GLRX3 PE=1 SV=2                                                     | GLRX3_HUMAN      | 37 kDa           | 5                         | 16%                 |
| 484 | Glycolipid transfer protein OS=Homo sapiens GN=GLTP PE=1 SV=3                                         | GLTP_HUMAN       | 24 kDa           | 2                         | 18%                 |
| 485 | Glucosidase 2 subunit beta OS=Homo sapiens GN=PRKCSH PE=1 SV=2                                        | GLU2B_HUMAN      | 59 kDa           | 11                        | 24%                 |
| 486 | Serine hydroxymethyltransferase, cytosolic OS=Homo sapiens GN=SHMT1 PE=1 SV=1                         | GLYC_HUMAN       | 53 kDa           | 14                        | 35%                 |
| 487 | Glycogenin-1 OS=Homo sapiens GN=GYG1 PE=1 SV=4                                                        | GLYG_HUMAN       | 39 kDa           | 2                         | 6.90%               |
| 488 | GDP-mannose 4,6 dehydratase OS=Homo sapiens GN=GMDS PE=1 SV=1                                         | GMDS_HUMAN       | 42 kDa           | 16                        | 46%                 |
| 489 | Glia maturation factor beta OS=Homo sapiens GN=GMFB PE=1 SV=2                                         | GMFB_HUMAN       | 17 kDa           | 3                         | 25%                 |
| 490 | Mannose-1-phosphate guanyltransferase alpha OS=Homo sapiens GN=GMPPA PE=1 SV=1                        | GMPPA_HUMAN      | 46 kDa           | 8                         | 22%                 |
| 491 | Mannose-1-phosphate guanyltransferase beta OS=Homo sapiens GN=GMPPB PE=1 SV=2                         | GMPPB_HUMAN      | 40 kDa           | 9                         | 34%                 |
| 492 | GMP reductase 2 OS=Homo sapiens GN=GMPR2 PE=1 SV=1                                                    | GMPR2_HUMAN      | 38 kDa           | 5                         | 21%                 |
| 493 | Glucosamine 6-phosphate N-acetyltransferase OS=Homo sapiens GN=GNPNAT1 PE=1 SV=1                      | GNA1_HUMAN       | 21 kDa           | 2                         | 16%                 |
| 494 | Guanine nucleotide-binding protein G(k) subunit alpha OS=Homo sapiens GN=GNAI3 PE=1 SV=3              | GNAI3_HUMAN      | 41 kDa           | 2                         | 10%                 |
| 495 | Guanine nucleotide-binding protein G(q) subunit alpha OS=Homo sapiens GN=GNAQ PE=1 SV=4               | GNAQ_HUMAN       | 42 kDa           | 6                         | 19%                 |
| 496 | Guanine nucleotide-binding protein G(s) subunit alpha isoforms XLas OS=Homo sapiens GN=GNAS PE=1 SV=2 | GNAS1_HUMAN (+1) | 111 kDa          | 8                         | 10%                 |
| 497 | Glucosamine-6-phosphate isomerase 1 OS=Homo sapiens GN=GNPDA1 PE=1 SV=1                               | GNP11_HUMAN      | 33 kDa           | 4                         | 17%                 |
| 498 | N-acetylglucosamine-1-phosphotransferase subunit gamma OS=Homo sapiens GN=GNPTG PE=1 SV=1             | GNPTG_HUMAN      | 34 kDa           | 4                         | 19%                 |
| 499 | N-acetylglucosamine-6-sulfatase OS=Homo sapiens GN=GNS PE=1 SV=3                                      | GNS_HUMAN        | 62 kDa           | 8                         | 15%                 |
| 500 | Golgi integral membrane protein 4 OS=Homo sapiens GN=GOLIM4 PE=1 SV=1                                 | GOLI4_HUMAN      | 82 kDa           | 3                         | 4.60%               |
| 501 | Golgi membrane protein 1 OS=Homo sapiens GN=GOLM1 PE=1 SV=1                                           | GOLM1_HUMAN      | 45 kDa           | 17                        | 45%                 |
| 502 | Golgi reassembly-stacking protein 2 OS=Homo sapiens GN=GORASP2 PE=1 SV=3                              | GORS2_HUMAN      | 47 kDa           | 2                         | 4.40%               |
| 503 | G-protein coupled receptor 126 OS=Homo sapiens GN=GPR126 PE=1 SV=3                                    | GP126_HUMAN      | 137 kDa          | 12                        | 10%                 |
| 504 | G-protein coupled receptor family C group 5 member B OS=Homo sapiens GN=GPRC5B PE=2 SV=2              | GPC5B_HUMAN      | 45 kDa           | 4                         | 16%                 |
| 505 | G-protein coupled receptor family C group 5 member C OS=Homo sapiens GN=GPRC5C PE=1 SV=2              | GPC5C_HUMAN      | 48 kDa           | 3                         | 7.90%               |
| 506 | Glycerol-3-phosphate dehydrogenase 1-like protein OS=Homo sapiens GN=GPD1L PE=1 SV=1                  | GPD1L_HUMAN      | 38 kDa           | 4                         | 14%                 |
| 507 | Glycerol-3-phosphate dehydrogenase [NAD+], cytoplasmic OS=Homo sapiens GN=GPD1 PE=1 SV=4              | GPDA_HUMAN       | 38 kDa           | 10                        | 33%                 |
| 508 | Transmembrane glycoprotein NMB OS=Homo sapiens GN=GPNMB PE=1 SV=2                                     | GPNMB_HUMAN      | 64 kDa           | 3                         | 7.90%               |
| 509 | G-protein coupled receptor 56 OS=Homo sapiens GN=GPR56 PE=1 SV=2                                      | GPR56_HUMAN      | 78 kDa           | 4                         | 8.80%               |
| 510 | Glutathione peroxidase 3 OS=Homo sapiens GN=GPX3 PE=1 SV=2                                            | GPX3_HUMAN       | 26 kDa           | 8                         | 38%                 |
| 511 | Phospholipid hydroperoxide glutathione peroxidase, mitochondrial OS=Homo sapiens GN=GPX4 PE=1 SV=3    | GPX4_HUMAN       | 22 kDa           | 9                         | 46%                 |

| #   | Proteins                                                                                            | Uniprot ID       | Molecular Weight | Number of unique peptides | Percent of coverage |
|-----|-----------------------------------------------------------------------------------------------------|------------------|------------------|---------------------------|---------------------|
| 512 | Growth factor receptor-bound protein 2 OS=Homo sapiens GN=GRB2 PE=1 SV=1                            | GRB2_HUMAN       | 25 kDa           | 2                         | 8.80%               |
| 513 | Gremlin-2 OS=Homo sapiens GN=GREM2 PE=1 SV=1                                                        | GREM2_HUMAN      | 19 kDa           | 4                         | 27%                 |
| 514 | Glyoxylate reductase/hydroxypyruvate reductase OS=Homo sapiens GN=GRHPR PE=1 SV=1                   | GRHPR_HUMAN      | 36 kDa           | 4                         | 18%                 |
| 515 | Granulins OS=Homo sapiens GN=GRN PE=1 SV=2                                                          | GRN_HUMAN        | 64 kDa           | 19                        | 46%                 |
| 516 | 78 kDa glucose-regulated protein OS=Homo sapiens GN=HSPA5 PE=1 SV=2                                 | GRP78_HUMAN      | 72 kDa           | 34                        | 49%                 |
| 517 | Glutamate--cysteine ligase catalytic subunit OS=Homo sapiens GN=GCLC PE=1 SV=2                      | GSH1_HUMAN       | 73 kDa           | 7                         | 12%                 |
| 518 | Glutathione synthetase OS=Homo sapiens GN=GSS PE=1 SV=1                                             | GSHB_HUMAN       | 52 kDa           | 20                        | 52%                 |
| 519 | Golgi apparatus protein 1 OS=Homo sapiens GN=GLG1 PE=1 SV=2                                         | GSLG1_HUMAN      | 135 kDa          | 4                         | 4.70%               |
| 520 | Glutathione S-transferase theta-2 OS=Homo sapiens GN=GSTT2 PE=1 SV=1                                | GST2_HUMAN (+1)  | 28 kDa           | 4                         | 22%                 |
| 521 | Glutathione S-transferase A1 OS=Homo sapiens GN=GSTA1 PE=1 SV=3                                     | GSTA1_HUMAN (+1) | 26 kDa           | 2                         | 8.60%               |
| 522 | Glutathione S-transferase kappa 1 OS=Homo sapiens GN=GSTK1 PE=1 SV=3                                | GSTK1_HUMAN      | 25 kDa           | 3                         | 12%                 |
| 523 | Glutathione S-transferase Mu 3 OS=Homo sapiens GN=GSTM3 PE=1 SV=3                                   | GSTM3_HUMAN      | 27 kDa           | 4                         | 21%                 |
| 524 | Glutathione S-transferase omega-1 OS=Homo sapiens GN=GSTO1 PE=1 SV=2                                | GSTO1_HUMAN      | 28 kDa           | 5                         | 21%                 |
| 525 | Glutathione S-transferase P OS=Homo sapiens GN=GSTP1 PE=1 SV=2                                      | GSTP1_HUMAN      | 23 kDa           | 3                         | 18%                 |
| 526 | Glutathione S-transferase theta-1 OS=Homo sapiens GN=GSTT1 PE=1 SV=4                                | GSTT1_HUMAN      | 27 kDa           | 4                         | 23%                 |
| 527 | GTP-binding protein 5 OS=Homo sapiens GN=GTPBP5 PE=2 SV=1                                           | GTPB5_HUMAN      | 44 kDa           | 2                         | 5.70%               |
| 528 | Histone H2A type 1-B/E OS=Homo sapiens GN=HIST1H2AB PE=1 SV=2                                       | H2A1B_HUMAN (+9) | 14 kDa           | 2                         | 22%                 |
| 529 | Histone H2B type 1-C/E/F/G/I OS=Homo sapiens GN=HIST1H2BC PE=1 SV=4                                 | H2B1C_HUMAN (+6) | 14 kDa           | 5                         | 41%                 |
| 530 | Histone H3.1t OS=Homo sapiens GN=HIST3H3 PE=1 SV=3                                                  | H31T_HUMAN (+2)  | 16 kDa           | 2                         | 5.90%               |
| 531 | Histone H4 OS=Homo sapiens GN=HIST1H4A PE=1 SV=2                                                    | H4_HUMAN         | 11 kDa           | 5                         | 40%                 |
| 532 | 28 kDa heat- and acid-stable phosphoprotein OS=Homo sapiens GN=PDAP1 PE=1 SV=1                      | HAP28_HUMAN      | 21 kDa           | 3                         | 14%                 |
| 533 | Hemoglobin subunit alpha OS=Homo sapiens GN=HBA1 PE=1 SV=2                                          | HBA_HUMAN        | 15 kDa           | 4                         | 40%                 |
| 534 | Hemoglobin subunit beta OS=Homo sapiens GN=HBB PE=1 SV=2                                            | HBB_HUMAN        | 16 kDa           | 6                         | 48%                 |
| 535 | Haloacid dehalogenase-like hydrolase domain-containing protein 2 OS=Homo sapiens GN=HDHD2 PE=1 SV=1 | HDHD2_HUMAN      | 29 kDa           | 3                         | 18%                 |
| 536 | Heme-binding protein 1 OS=Homo sapiens GN=HEBP1 PE=1 SV=1                                           | HEBP1_HUMAN      | 21 kDa           | 6                         | 40%                 |
| 537 | Heme-binding protein 2 OS=Homo sapiens GN=HEBP2 PE=1 SV=1                                           | HEBP2_HUMAN      | 23 kDa           | 7                         | 43%                 |
| 538 | Delta-aminolevulinic acid dehydratase OS=Homo sapiens GN=ALAD PE=1 SV=1                             | HEM2_HUMAN       | 36 kDa           | 8                         | 30%                 |
| 539 | Hemopexin OS=Homo sapiens GN=HPX PE=1 SV=2                                                          | HEMO_HUMAN       | 52 kDa           | 18                        | 51%                 |
| 540 | Heparin cofactor 2 OS=Homo sapiens GN=SERPIND1 PE=1 SV=3                                            | HEP2_HUMAN       | 57 kDa           | 10                        | 20%                 |
| 541 | Beta-hexosaminidase subunit alpha OS=Homo sapiens GN=HEXA PE=1 SV=2                                 | HEXA_HUMAN       | 61 kDa           | 8                         | 19%                 |
| 542 | Beta-hexosaminidase subunit beta OS=Homo sapiens GN=HEXB PE=1 SV=3                                  | HEXB_HUMAN       | 63 kDa           | 17                        | 33%                 |
| 543 | HLA class II histocompatibility antigen gamma chain OS=Homo sapiens GN=CD74 PE=1 SV=3               | HG2A_HUMAN       | 34 kDa           | 2                         | 8.80%               |
| 544 | 3-hydroxyisobutyryl-CoA hydrolase, mitochondrial OS=Homo sapiens GN=HIBCH PE=1 SV=2                 | HIBCH_HUMAN      | 43 kDa           | 5                         | 16%                 |
| 545 | Histidine triad nucleotide-binding protein 1 OS=Homo sapiens GN=HINT1 PE=1 SV=2                     | HINT1_HUMAN      | 14 kDa           | 3                         | 24%                 |
| 546 | HLA class I histocompatibility antigen, alpha chain E OS=Homo sapiens GN=HLA-E PE=1 SV=3            | HLAE_HUMAN       | 40 kDa           | 2                         | 11%                 |
| 547 | HLA class I histocompatibility antigen, alpha chain G OS=Homo sapiens GN=HLA-G PE=1 SV=1            | HLAG_HUMAN       | 38 kDa           | 2                         | 11%                 |
| 548 | Histamine N-methyltransferase OS=Homo sapiens GN=HNMT PE=1 SV=1                                     | HNMT_HUMAN       | 33 kDa           | 4                         | 16%                 |
| 549 | Heterogeneous nuclear ribonucleoprotein K OS=Homo sapiens GN=HNRNPK PE=1 SV=1                       | HNRPK_HUMAN      | 51 kDa           | 9                         | 22%                 |
| 550 | Heterogeneous nuclear ribonucleoprotein Q OS=Homo sapiens GN=SYNCRIP PE=1 SV=2                      | HNRPQ_HUMAN      | 70 kDa           | 11                        | 18%                 |

| #   | Proteins                                                                          | Uniprot ID  | Molecular Weight | Number of unique peptides | Percent of coverage |
|-----|-----------------------------------------------------------------------------------|-------------|------------------|---------------------------|---------------------|
| 551 | Hyaluronan and proteoglycan link protein 3 OS=Homo sapiens GN=HAPLN3 PE=2 SV=1    | HPLN3_HUMAN | 41 kDa           | 17                        | 56%                 |
| 552 | Hypoxanthine-guanine phosphoribosyltransferase OS=Homo sapiens GN=HPRT1 PE=1 SV=2 | HPRT_HUMAN  | 25 kDa           | 6                         | 29%                 |
| 553 | Haptoglobin OS=Homo sapiens GN=HP PE=1 SV=1                                       | HPT_HUMAN   | 45 kDa           | 30                        | 69%                 |
| 554 | Haptoglobin-related protein OS=Homo sapiens GN=HPR PE=1 SV=2                      | HPTR_HUMAN  | 39 kDa           | 2                         | 42%                 |
| 555 | Histidine-rich glycoprotein OS=Homo sapiens GN=HRG PE=1 SV=1                      | HRG_HUMAN   | 60 kDa           | 3                         | 6.70%               |
| 556 | Heat shock protein 105 kDa OS=Homo sapiens GN=HSPH1 PE=1 SV=1                     | HS105_HUMAN | 97 kDa           | 3                         | 5.00%               |
| 557 | Heat shock protein HSP 90-alpha OS=Homo sapiens GN=HSP90AA1 PE=1 SV=5             | HS90A_HUMAN | 85 kDa           | 39                        | 53%                 |
| 558 | Heat shock protein HSP 90-beta OS=Homo sapiens GN=HSP90AB1 PE=1 SV=4              | HS90B_HUMAN | 83 kDa           | 18                        | 47%                 |
| 559 | Heat shock 70 kDa protein 13 OS=Homo sapiens GN=HSPA13 PE=1 SV=1                  | HSP13_HUMAN | 52 kDa           | 10                        | 26%                 |
| 560 | Heat shock 70 kDa protein 1A/1B OS=Homo sapiens GN=HSPA1A PE=1 SV=5               | HSP71_HUMAN | 70 kDa           | 19                        | 45%                 |
| 561 | Heat shock 70 kDa protein 4 OS=Homo sapiens GN=HSPA4 PE=1 SV=4                    | HSP74_HUMAN | 94 kDa           | 8                         | 13%                 |
| 562 | Heat shock cognate 71 kDa protein OS=Homo sapiens GN=HSPA8 PE=1 SV=1              | HSP7C_HUMAN | 71 kDa           | 28                        | 53%                 |
| 563 | Heat shock protein beta-1 OS=Homo sapiens GN=HSPB1 PE=1 SV=2                      | HSPB1_HUMAN | 23 kDa           | 13                        | 85%                 |
| 564 | E3 ubiquitin-protein ligase HUWE1 OS=Homo sapiens GN=HUWE1 PE=1 SV=3              | HUWE1_HUMAN | 482 kDa          | 4                         | 1.10%               |
| 565 | Ig heavy chain V-I region HG3 OS=Homo sapiens PE=4 SV=1                           | HV102_HUMAN | 13 kDa           | 2                         | 28%                 |
| 566 | Ig heavy chain V-I region V35 OS=Homo sapiens PE=1 SV=1                           | HV103_HUMAN | 13 kDa           | 4                         | 38%                 |
| 567 | Ig heavy chain V-II region WAH OS=Homo sapiens PE=1 SV=1                          | HV206_HUMAN | 14 kDa           | 2                         | 13%                 |
| 568 | Ig heavy chain V-II region SESS OS=Homo sapiens PE=2 SV=1                         | HV208_HUMAN | 16 kDa           | 3                         | 14%                 |
| 569 | Ig heavy chain V-II region ARH-77 OS=Homo sapiens PE=4 SV=1                       | HV209_HUMAN | 16 kDa           | 2                         | 17%                 |
| 570 | Ig heavy chain V-III region TRO OS=Homo sapiens PE=1 SV=1                         | HV301_HUMAN | 13 kDa           | 3                         | 24%                 |
| 571 | Ig heavy chain V-III region WEA OS=Homo sapiens PE=1 SV=1                         | HV302_HUMAN | 12 kDa           | 2                         | 36%                 |
| 572 | Ig heavy chain V-III region VH26 OS=Homo sapiens PE=1 SV=1                        | HV303_HUMAN | 13 kDa           | 3                         | 22%                 |
| 573 | Ig heavy chain V-III region BUT OS=Homo sapiens PE=1 SV=1                         | HV306_HUMAN | 12 kDa           | 2                         | 36%                 |
| 574 | Ig heavy chain V-III region CAM OS=Homo sapiens PE=1 SV=1                         | HV307_HUMAN | 14 kDa           | 3                         | 28%                 |
| 575 | Ig heavy chain V-III region GA OS=Homo sapiens PE=1 SV=1                          | HV308_HUMAN | 13 kDa           | 3                         | 25%                 |
| 576 | Ig heavy chain V-III region NIE OS=Homo sapiens PE=1 SV=1                         | HV309_HUMAN | 13 kDa           | 3                         | 26%                 |
| 577 | Ig heavy chain V-III region HIL OS=Homo sapiens PE=1 SV=1                         | HV310_HUMAN | 14 kDa           | 2                         | 16%                 |
| 578 | Ig heavy chain V-III region GAL OS=Homo sapiens PE=1 SV=1                         | HV320_HUMAN | 13 kDa           | 4                         | 41%                 |
| 579 | Epoxide hydrolase 2 OS=Homo sapiens GN=EPHX2 PE=1 SV=2                            | HYES_HUMAN  | 63 kDa           | 2                         | 7.70%               |
| 580 | Hypoxia up-regulated protein 1 OS=Homo sapiens GN=HYOU1 PE=1 SV=1                 | HYOU1_HUMAN | 111 kDa          | 22                        | 28%                 |
| 581 | Huntingtin-interacting protein K OS=Homo sapiens GN=HYPK PE=1 SV=2                | HYPK_HUMAN  | 15 kDa           | 2                         | 20%                 |
| 582 | Interleukin-18-binding protein OS=Homo sapiens GN=IL18BP PE=1 SV=2                | I18BP_HUMAN | 21 kDa           | 5                         | 24%                 |
| 583 | Insulin-like growth factor-binding protein 2 OS=Homo sapiens GN=IGFBP2 PE=1 SV=2  | IBP2_HUMAN  | 35 kDa           | 18                        | 67%                 |
| 584 | Insulin-like growth factor-binding protein 7 OS=Homo sapiens GN=IGFBP7 PE=1 SV=1  | IBP7_HUMAN  | 29 kDa           | 2                         | 12%                 |
| 585 | Plasma protease C1 inhibitor OS=Homo sapiens GN=SERPING1 PE=1 SV=2                | IC1_HUMAN   | 55 kDa           | 16                        | 29%                 |
| 586 | Calpastatin OS=Homo sapiens GN=CAST PE=1 SV=4                                     | ICAL_HUMAN  | 77 kDa           | 6                         | 13%                 |
| 587 | Intercellular adhesion molecule 1 OS=Homo sapiens GN=ICAM1 PE=1 SV=2              | ICAM1_HUMAN | 58 kDa           | 9                         | 22%                 |
| 588 | Isocitrate dehydrogenase [NADP] cytoplasmic OS=Homo sapiens GN=IDH1 PE=1 SV=2     | IDHC_HUMAN  | 47 kDa           | 27                        | 64%                 |
| 589 | Isocitrate dehydrogenase [NADP], mitochondrial OS=Homo sapiens GN=IDH2 PE=1 SV=2  | IDHP_HUMAN  | 51 kDa           | 3                         | 10.00%              |
| 590 | Isopentenyl-diphosphate Delta-isomerase 1 OS=Homo sapiens GN=IDI1 PE=1 SV=2       | IDI1_HUMAN  | 26 kDa           | 6                         | 28%                 |

| #   | Proteins                                                                                       | Uniprot ID       | Molecular Weight | Number of unique peptides | Percent of coverage |
|-----|------------------------------------------------------------------------------------------------|------------------|------------------|---------------------------|---------------------|
| 591 | Alpha-L-iduronidase OS=Homo sapiens GN=IDUA PE=1 SV=2                                          | IDUA_HUMAN       | 73 kDa           | 4                         | 9.60%               |
| 592 | Eukaryotic translation initiation factor 1A, X-chromosomal OS=Homo sapiens GN=EIF1AX PE=1 SV=2 | IF1AX_HUMAN (+1) | 16 kDa           | 2                         | 15%                 |
| 593 | Eukaryotic translation initiation factor 2 subunit 1 OS=Homo sapiens GN=EIF2S1 PE=1 SV=3       | IF2A_HUMAN       | 36 kDa           | 3                         | 9.50%               |
| 594 | Eukaryotic translation initiation factor 2 subunit 3 OS=Homo sapiens GN=EIF2S3 PE=1 SV=3       | IF2G_HUMAN       | 51 kDa           | 6                         | 18%                 |
| 595 | Eukaryotic initiation factor 4A-I OS=Homo sapiens GN=EIF4A1 PE=1 SV=1                          | IF4A1_HUMAN      | 46 kDa           | 11                        | 31%                 |
| 596 | Eukaryotic initiation factor 4A-II OS=Homo sapiens GN=EIF4A2 PE=1 SV=2                         | IF4A2_HUMAN      | 46 kDa           | 5                         | 27%                 |
| 597 | Eukaryotic translation initiation factor 4B OS=Homo sapiens GN=EIF4B PE=1 SV=2                 | IF4B_HUMAN       | 69 kDa           | 5                         | 10%                 |
| 598 | Eukaryotic translation initiation factor 4 gamma 1 OS=Homo sapiens GN=EIF4G1 PE=1 SV=4         | IF4G1_HUMAN      | 175 kDa          | 9                         | 6.80%               |
| 599 | Eukaryotic translation initiation factor 4 gamma 2 OS=Homo sapiens GN=EIF4G2 PE=1 SV=1         | IF4G2_HUMAN      | 102 kDa          | 2                         | 1.80%               |
| 600 | Eukaryotic translation initiation factor 4H OS=Homo sapiens GN=EIF4H PE=1 SV=5                 | IF4H_HUMAN       | 27 kDa           | 3                         | 11%                 |
| 601 | Eukaryotic translation initiation factor 5 OS=Homo sapiens GN=EIF5 PE=1 SV=2                   | IF5_HUMAN        | 49 kDa           | 2                         | 5.60%               |
| 602 | Eukaryotic translation initiation factor 5A-1 OS=Homo sapiens GN=EIF5A PE=1 SV=2               | IF5A1_HUMAN      | 17 kDa           | 8                         | 51%                 |
| 603 | Ig alpha-1 chain C region OS=Homo sapiens GN=IGHA1 PE=1 SV=2                                   | IGHA1_HUMAN      | 38 kDa           | 21                        | 83%                 |
| 604 | Ig alpha-2 chain C region OS=Homo sapiens GN=IGHA2 PE=1 SV=3                                   | IGHA2_HUMAN      | 37 kDa           | 5                         | 74%                 |
| 605 | Ig delta chain C region OS=Homo sapiens GN=IGHD PE=1 SV=2                                      | IGHD_HUMAN       | 42 kDa           | 7                         | 28%                 |
| 606 | Ig gamma-1 chain C region OS=Homo sapiens GN=IGHG1 PE=1 SV=1                                   | IGHG1_HUMAN      | 36 kDa           | 14                        | 56%                 |
| 607 | Ig gamma-2 chain C region OS=Homo sapiens GN=IGHG2 PE=1 SV=2                                   | IGHG2_HUMAN      | 36 kDa           | 8                         | 42%                 |
| 608 | Ig gamma-3 chain C region OS=Homo sapiens GN=IGHG3 PE=1 SV=2                                   | IGHG3_HUMAN      | 41 kDa           | 2                         | 29%                 |
| 609 | Ig gamma-4 chain C region OS=Homo sapiens GN=IGHG4 PE=1 SV=1                                   | IGHG4_HUMAN      | 36 kDa           | 4                         | 43%                 |
| 610 | Ig mu chain C region OS=Homo sapiens GN=IGHM PE=1 SV=3                                         | IGHM_HUMAN       | 49 kDa           | 21                        | 53%                 |
| 611 | Immunoglobulin J chain OS=Homo sapiens GN=IGJ PE=1 SV=4                                        | IGJ_HUMAN        | 18 kDa           | 11                        | 73%                 |
| 612 | Ig kappa chain C region OS=Homo sapiens GN=IGKC PE=1 SV=1                                      | IGKC_HUMAN       | 12 kDa           | 8                         | 86%                 |
| 613 | Immunoglobulin lambda-like polypeptide 1 OS=Homo sapiens GN=IGLL1 PE=1 SV=1                    | IGLL1_HUMAN      | 23 kDa           | 2                         | 18%                 |
| 614 | Immunoglobulin lambda-like polypeptide 5 OS=Homo sapiens GN=IGLL5 PE=2 SV=2                    | IGLL5_HUMAN      | 23 kDa           | 4                         | 50%                 |
| 615 | Immunoglobulin superfamily member 8 OS=Homo sapiens GN=IGSF8 PE=1 SV=1                         | IGSF8_HUMAN      | 65 kDa           | 4                         | 9.00%               |
| 616 | Interleukin-19 OS=Homo sapiens GN=IL19 PE=1 SV=2                                               | IL19_HUMAN       | 20 kDa           | 5                         | 31%                 |
| 617 | Interleukin-6 receptor subunit beta OS=Homo sapiens GN=IL6ST PE=1 SV=2                         | IL6RB_HUMAN      | 104 kDa          | 2                         | 1.70%               |
| 618 | Leukocyte elastase inhibitor OS=Homo sapiens GN=SERPINB1 PE=1 SV=1                             | ILEU_HUMAN       | 43 kDa           | 6                         | 17%                 |
| 619 | Importin subunit beta-1 OS=Homo sapiens GN=KPXB1 PE=1 SV=2                                     | IMB1_HUMAN       | 97 kDa           | 13                        | 16%                 |
| 620 | Inosine-5'-monophosphate dehydrogenase 2 OS=Homo sapiens GN=IMPDH2 PE=1 SV=2                   | IMDH2_HUMAN      | 56 kDa           | 5                         | 15%                 |
| 621 | Inositol monophosphatase 3 OS=Homo sapiens GN=IMPAD1 PE=1 SV=1                                 | IMPA3_HUMAN      | 39 kDa           | 3                         | 7.80%               |
| 622 | Interferon-induced 35 kDa protein OS=Homo sapiens GN=IFI35 PE=1 SV=5                           | IN35_HUMAN       | 32 kDa           | 2                         | 7.00%               |
| 623 | InaD-like protein OS=Homo sapiens GN=INADL PE=1 SV=3                                           | INADL_HUMAN      | 196 kDa          | 2                         | 1.20%               |
| 624 | Integrator complex subunit 3 OS=Homo sapiens GN=INTS3 PE=1 SV=1                                | INT3_HUMAN       | 118 kDa          | 2                         | 3.70%               |
| 625 | Importin-4 OS=Homo sapiens GN=IPO4 PE=1 SV=2                                                   | IPO4_HUMAN       | 119 kDa          | 2                         | 3.00%               |
| 626 | Importin-5 OS=Homo sapiens GN=IPO5 PE=1 SV=4                                                   | IPO5_HUMAN       | 124 kDa          | 11                        | 15%                 |
| 627 | Importin-7 OS=Homo sapiens GN=IPO7 PE=1 SV=1                                                   | IPO7_HUMAN       | 120 kDa          | 2                         | 2.10%               |
| 628 | Protein phosphatase inhibitor 2 OS=Homo sapiens GN=PPP1R2 PE=1 SV=2                            | IPP2_HUMAN       | 23 kDa           | 6                         | 38%                 |
| 629 | Plasma serine protease inhibitor OS=Homo sapiens GN=SERPINA5 PE=1 SV=3                         | IPSP_HUMAN       | 46 kDa           | 8                         | 23%                 |
| 630 | Inorganic pyrophosphatase OS=Homo sapiens GN=PPA1 PE=1 SV=2                                    | IPYR_HUMAN       | 33 kDa           | 15                        | 64%                 |



| #   | Proteins                                                                                            | Uniprot ID  | Molecular Weight | Number of unique peptides | Percent of coverage |
|-----|-----------------------------------------------------------------------------------------------------|-------------|------------------|---------------------------|---------------------|
| 631 | Ras GTPase-activating-like protein IQGAP1 OS=Homo sapiens GN=IQGAP1 PE=1 SV=1                       | IQGA1_HUMAN | 189 kDa          | 33                        | 26%                 |
| 632 | Ras GTPase-activating-like protein IQGAP2 OS=Homo sapiens GN=IQGAP2 PE=1 SV=4                       | IQGA2_HUMAN | 181 kDa          | 3                         | 2.20%               |
| 633 | Immunoglobulin superfamily containing leucine-rich repeat protein OS=Homo sapiens GN=ISLR PE=1 SV=1 | ISLR_HUMAN  | 46 kDa           | 5                         | 15%                 |
| 634 | Isochorismatase domain-containing protein 1 OS=Homo sapiens GN=ISOC1 PE=1 SV=3                      | ISOC1_HUMAN | 32 kDa           | 5                         | 22%                 |
| 635 | IST1 homolog OS=Homo sapiens GN=KIAA0174 PE=1 SV=1                                                  | IST1_HUMAN  | 40 kDa           | 4                         | 9.90%               |
| 636 | Integrin beta-like protein 1 OS=Homo sapiens GN=ITGBL1 PE=2 SV=1                                    | ITGBL_HUMAN | 54 kDa           | 2                         | 5.90%               |
| 637 | Inter-alpha-trypsin inhibitor heavy chain H1 OS=Homo sapiens GN=ITIH1 PE=1 SV=3                     | ITIH1_HUMAN | 101 kDa          | 17                        | 22%                 |
| 638 | Inter-alpha-trypsin inhibitor heavy chain H2 OS=Homo sapiens GN=ITIH2 PE=1 SV=2                     | ITIH2_HUMAN | 106 kDa          | 24                        | 26%                 |
| 639 | Inter-alpha-trypsin inhibitor heavy chain H3 OS=Homo sapiens GN=ITIH3 PE=1 SV=2                     | ITIH3_HUMAN | 100 kDa          | 4                         | 5.70%               |
| 640 | Inter-alpha-trypsin inhibitor heavy chain H4 OS=Homo sapiens GN=ITIH4 PE=1 SV=4                     | ITIH4_HUMAN | 103 kDa          | 33                        | 42%                 |
| 641 | Keratin, type I cytoskeletal 10 OS=Homo sapiens GN=KRT10 PE=1 SV=6                                  | K1C10_HUMAN | 59 kDa           | 10                        | 18%                 |
| 642 | Keratin, type I cytoskeletal 19 OS=Homo sapiens GN=KRT19 PE=1 SV=4                                  | K1C19_HUMAN | 44 kDa           | 6                         | 17%                 |
| 643 | Keratin, type I cytoskeletal 9 OS=Homo sapiens GN=KRT9 PE=1 SV=3                                    | K1C9_HUMAN  | 62 kDa           | 11                        | 28%                 |
| 644 | Keratin, type II cytoskeletal 2 epidermal OS=Homo sapiens GN=KRT2 PE=1 SV=2                         | K22E_HUMAN  | 65 kDa           | 12                        | 27%                 |
| 645 | Keratin, type II cytoskeletal 1 OS=Homo sapiens GN=KRT1 PE=1 SV=6                                   | K2C1_HUMAN  | 66 kDa           | 24                        | 41%                 |
| 646 | Keratin, type II cytoskeletal 7 OS=Homo sapiens GN=KRT7 PE=1 SV=5                                   | K2C7_HUMAN  | 51 kDa           | 4                         | 12%                 |
| 647 | Keratin, type II cytoskeletal 8 OS=Homo sapiens GN=KRT8 PE=1 SV=7                                   | K2C8_HUMAN  | 54 kDa           | 6                         | 15%                 |
| 648 | 6-phosphofructokinase, liver type OS=Homo sapiens GN=PFKL PE=1 SV=6                                 | K6PL_HUMAN  | 85 kDa           | 13                        | 21%                 |
| 649 | Adenylate kinase isoenzyme 1 OS=Homo sapiens GN=AK1 PE=1 SV=3                                       | KAD1_HUMAN  | 22 kDa           | 11                        | 66%                 |
| 650 | Kallistatin OS=Homo sapiens GN=SERPINA4 PE=1 SV=3                                                   | KAIN_HUMAN  | 49 kDa           | 8                         | 24%                 |
| 651 | cAMP-dependent protein kinase type II-alpha regulatory subunit OS=Homo sapiens GN=PRKAR2A PE=1 SV=2 | KAP2_HUMAN  | 46 kDa           | 9                         | 25%                 |
| 652 | cAMP-dependent protein kinase type II-beta regulatory subunit OS=Homo sapiens GN=PRKAR2B PE=1 SV=3  | KAP3_HUMAN  | 46 kDa           | 2                         | 11%                 |
| 653 | cAMP-dependent protein kinase catalytic subunit alpha OS=Homo sapiens GN=PRKACA PE=1 SV=2           | KAPCA_HUMAN | 41 kDa           | 4                         | 13%                 |
| 654 | Kynurenine--oxoglutarate transaminase 3 OS=Homo sapiens GN=CCBL2 PE=1 SV=1                          | KAT3_HUMAN  | 51 kDa           | 4                         | 9.90%               |
| 655 | Casein kinase I isoform alpha OS=Homo sapiens GN=CSNK1A1 PE=1 SV=2                                  | KC1A_HUMAN  | 39 kDa           | 3                         | 8.90%               |
| 656 | BTB/POZ domain-containing protein KCTD14 OS=Homo sapiens GN=KCTD14 PE=2 SV=2                        | KCD14_HUMAN | 30 kDa           | 6                         | 31%                 |
| 657 | UMP-CMP kinase OS=Homo sapiens GN=CMPK1 PE=1 SV=3                                                   | KCY_HUMAN   | 22 kDa           | 15                        | 64%                 |
| 658 | Kinesin-like protein KIF27 OS=Homo sapiens GN=KIF27 PE=2 SV=1                                       | KIF27_HUMAN | 160 kDa          | 2                         | 1.20%               |
| 659 | Mevalonate kinase OS=Homo sapiens GN=MVK PE=1 SV=1                                                  | KIME_HUMAN  | 42 kDa           | 2                         | 5.80%               |
| 660 | Kinesin-1 heavy chain OS=Homo sapiens GN=KIF5B PE=1 SV=1                                            | KINH_HUMAN  | 110 kDa          | 6                         | 6.60%               |
| 661 | Kallikrein-6 OS=Homo sapiens GN=KLK6 PE=1 SV=1                                                      | KLK6_HUMAN  | 27 kDa           | 12                        | 60%                 |
| 662 | Kallikrein-8 OS=Homo sapiens GN=KLK8 PE=1 SV=1                                                      | KLK8_HUMAN  | 28 kDa           | 2                         | 11%                 |
| 663 | Plasma kallikrein OS=Homo sapiens GN=KLKB1 PE=1 SV=1                                                | KLKB1_HUMAN | 71 kDa           | 2                         | 3.80%               |
| 664 | Kininogen-1 OS=Homo sapiens GN=KNG1 PE=1 SV=2                                                       | KNG1_HUMAN  | 72 kDa           | 24                        | 40%                 |
| 665 | Phosphoribosyl pyrophosphate synthase-associated protein 1 OS=Homo sapiens GN=PRPSAP1 PE=1 SV=2     | KPRA_HUMAN  | 39 kDa           | 2                         | 6.20%               |
| 666 | Pyruvate kinase isozymes M1/M2 OS=Homo sapiens GN=PKM2 PE=1 SV=4                                    | KPYM_HUMAN  | 58 kDa           | 26                        | 66%                 |
| 667 | Kinectin OS=Homo sapiens GN=KTN1 PE=1 SV=1                                                          | KTN1_HUMAN  | 156 kDa          | 9                         | 8.40%               |
| 668 | Ig kappa chain V-I region DEE OS=Homo sapiens PE=1 SV=1                                             | KV105_HUMAN | 12 kDa           | 3                         | 22%                 |
| 669 | Ig kappa chain V-I region EU OS=Homo sapiens PE=1 SV=1                                              | KV106_HUMAN | 12 kDa           | 3                         | 32%                 |
| 670 | Ig kappa chain V-I region Kue OS=Homo sapiens PE=1 SV=1                                             | KV112_HUMAN | 12 kDa           | 2                         | 19%                 |

| #   | Proteins                                                                                             | Uniprot ID  | Molecular Weight | Number of unique peptides | Percent of coverage |
|-----|------------------------------------------------------------------------------------------------------|-------------|------------------|---------------------------|---------------------|
| 671 | Ig kappa chain V-I region OU OS=Homo sapiens PE=1 SV=1                                               | KV114_HUMAN | 12 kDa           | 3                         | 22%                 |
| 672 | Ig kappa chain V-I region Rei OS=Homo sapiens PE=1 SV=1                                              | KV115_HUMAN | 12 kDa           | 2                         | 44%                 |
| 673 | Ig kappa chain V-I region Roy OS=Homo sapiens PE=1 SV=1                                              | KV116_HUMAN | 12 kDa           | 2                         | 31%                 |
| 674 | Ig kappa chain V-I region WEA OS=Homo sapiens PE=1 SV=1                                              | KV118_HUMAN | 12 kDa           | 3                         | 36%                 |
| 675 | Ig kappa chain V-I region Wes OS=Homo sapiens PE=1 SV=1                                              | KV119_HUMAN | 12 kDa           | 2                         | 22%                 |
| 676 | Ig kappa chain V-I region Mev OS=Homo sapiens PE=1 SV=1                                              | KV120_HUMAN | 12 kDa           | 2                         | 31%                 |
| 677 | Ig kappa chain V-II region MIL OS=Homo sapiens PE=1 SV=1                                             | KV203_HUMAN | 12 kDa           | 4                         | 39%                 |
| 678 | Ig kappa chain V-II region TEW OS=Homo sapiens PE=1 SV=1                                             | KV204_HUMAN | 12 kDa           | 2                         | 39%                 |
| 679 | Ig kappa chain V-II region RPMI 6410 OS=Homo sapiens PE=4 SV=1                                       | KV206_HUMAN | 15 kDa           | 3                         | 18%                 |
| 680 | Ig kappa chain V-III region B6 OS=Homo sapiens PE=1 SV=1                                             | KV301_HUMAN | 12 kDa           | 4                         | 38%                 |
| 681 | Ig kappa chain V-III region NG9 (Fragment) OS=Homo sapiens PE=1 SV=1                                 | KV303_HUMAN | 11 kDa           | 3                         | 32%                 |
| 682 | Ig kappa chain V-III region WOL OS=Homo sapiens PE=1 SV=1                                            | KV305_HUMAN | 12 kDa           | 6                         | 52%                 |
| 683 | Ig kappa chain V-III region CLL OS=Homo sapiens PE=1 SV=2                                            | KV308_HUMAN | 14 kDa           | 2                         | 19%                 |
| 684 | Ig kappa chain V-IV region Len OS=Homo sapiens PE=1 SV=2                                             | KV402_HUMAN | 13 kDa           | 3                         | 30%                 |
| 685 | Kyphoscoliosis peptidase OS=Homo sapiens GN=KY PE=1 SV=2                                             | KY_HUMAN    | 64 kDa           | 2                         | 1.60%               |
| 686 | Ig lambda-2 chain C regions OS=Homo sapiens GN=IGLC2 PE=1 SV=1                                       | LAC2_HUMAN  | 11 kDa           | 10                        | 93%                 |
| 687 | Ig lambda-7 chain C region OS=Homo sapiens GN=IGLC7 PE=1 SV=2                                        | LAC7_HUMAN  | 11 kDa           | 3                         | 79%                 |
| 688 | Alpha-lactalbumin OS=Homo sapiens GN=LALBA PE=1 SV=1                                                 | LALBA_HUMAN | 16 kDa           | 16                        | 80%                 |
| 689 | Laminin subunit beta-2 OS=Homo sapiens GN=LAMB2 PE=1 SV=2                                            | LAMB2_HUMAN | 196 kDa          | 2                         | 1.30%               |
| 690 | Laminin subunit gamma-1 OS=Homo sapiens GN=LAMC1 PE=1 SV=3                                           | LAMC1_HUMAN | 178 kDa          | 4                         | 4.40%               |
| 691 | Lysosome-associated membrane glycoprotein 1 OS=Homo sapiens GN=LAMP1 PE=1 SV=3                       | LAMP1_HUMAN | 45 kDa           | 4                         | 8.60%               |
| 692 | Lysosome-associated membrane glycoprotein 2 OS=Homo sapiens GN=LAMP2 PE=1 SV=2                       | LAMP2_HUMAN | 45 kDa           | 2                         | 4.10%               |
| 693 | LanC-like protein 1 OS=Homo sapiens GN=LANCL1 PE=1 SV=1                                              | LANC1_HUMAN | 45 kDa           | 4                         | 12%                 |
| 694 | LIM and SH3 domain protein 1 OS=Homo sapiens GN=LASP1 PE=1 SV=2                                      | LASP1_HUMAN | 30 kDa           | 11                        | 34%                 |
| 695 | L-lactate dehydrogenase A chain OS=Homo sapiens GN=LDHA PE=1 SV=2                                    | LDHA_HUMAN  | 37 kDa           | 8                         | 30%                 |
| 696 | L-lactate dehydrogenase B chain OS=Homo sapiens GN=LDHB PE=1 SV=2                                    | LDHB_HUMAN  | 37 kDa           | 20                        | 64%                 |
| 697 | Galectin-1 OS=Homo sapiens GN=LGALS1 PE=1 SV=2                                                       | LEG1_HUMAN  | 15 kDa           | 5                         | 41%                 |
| 698 | Galectin-3 OS=Homo sapiens GN=LGALS3 PE=1 SV=5                                                       | LEG3_HUMAN  | 26 kDa           | 5                         | 23%                 |
| 699 | Galectin-3-binding protein OS=Homo sapiens GN=LGALS3BP PE=1 SV=1                                     | LG3BP_HUMAN | 65 kDa           | 21                        | 41%                 |
| 700 | Legumain OS=Homo sapiens GN=LGMN PE=1 SV=1                                                           | LGMN_HUMAN  | 49 kDa           | 11                        | 30%                 |
| 701 | Lactoylglutathione lyase OS=Homo sapiens GN=GLO1 PE=1 SV=4                                           | LGUL_HUMAN  | 21 kDa           | 5                         | 28%                 |
| 702 | Phospholysine phosphohistidine inorganic pyrophosphate phosphatase OS=Homo sapiens GN=LHPP PE=1 SV=2 | LHPP_HUMAN  | 29 kDa           | 2                         | 11%                 |
| 703 | Lysosomal acid lipase/cholesteryl ester hydrolase OS=Homo sapiens GN=LIPA PE=1 SV=2                  | LICH_HUMAN  | 45 kDa           | 2                         | 6.80%               |
| 704 | Lipoprotein lipase OS=Homo sapiens GN=LPL PE=1 SV=1                                                  | LIPL_HUMAN  | 53 kDa           | 16                        | 37%                 |
| 705 | Platelet-activating factor acetylhydrolase IB subunit alpha OS=Homo sapiens GN=PFAH1B1 PE=1 SV=2     | LIS1_HUMAN  | 47 kDa           | 7                         | 21%                 |
| 706 | Leukotriene A-4 hydrolase OS=Homo sapiens GN=LTA4H PE=1 SV=2                                         | LKHA4_HUMAN | 69 kDa           | 19                        | 35%                 |
| 707 | Protein ERGIC-53 OS=Homo sapiens GN=LMAN1 PE=1 SV=2                                                  | LMAN1_HUMAN | 58 kDa           | 6                         | 17%                 |
| 708 | Vesicular integral-membrane protein VIP36 OS=Homo sapiens GN=LMAN2 PE=1 SV=1                         | LMAN2_HUMAN | 40 kDa           | 2                         | 5.30%               |
| 709 | Prelamin-A/C OS=Homo sapiens GN=LMNA PE=1 SV=1                                                       | LMNA_HUMAN  | 74 kDa           | 2                         | 3.00%               |
| 710 | Leucine-rich repeat-containing protein 26 OS=Homo sapiens GN=LRRC26 PE=1 SV=2                        | LRC26_HUMAN | 35 kDa           | 4                         | 15%                 |
| 711 | Leucine-rich repeat-containing protein 47 OS=Homo sapiens GN=LRRC47 PE=1 SV=1                        | LRC47_HUMAN | 63 kDa           | 2                         | 4.60%               |

| #   | Proteins                                                                                      | Uniprot ID       | Molecular Weight | Number of unique peptides | Percent of coverage |
|-----|-----------------------------------------------------------------------------------------------|------------------|------------------|---------------------------|---------------------|
| 712 | Leucine-rich repeat flightless-interacting protein 1 OS=Homo sapiens GN=LRRFIP1 PE=1 SV=2     | LRRF1_HUMAN      | 89 kDa           | 4                         | 5.10%               |
| 713 | Lipolysis-stimulated lipoprotein receptor OS=Homo sapiens GN=LSR PE=1 SV=4                    | LSR_HUMAN        | 71 kDa           | 11                        | 20%                 |
| 714 | Latent-transforming growth factor beta-binding protein 1 OS=Homo sapiens GN=LTBP1 PE=1 SV=4   | LTBP1_HUMAN      | 187 kDa          | 8                         | 6.00%               |
| 715 | Latent-transforming growth factor beta-binding protein 4 OS=Homo sapiens GN=LTBP4 PE=1 SV=2   | LTBP4_HUMAN      | 173 kDa          | 3                         | 3.00%               |
| 716 | Lumican OS=Homo sapiens GN=LUM PE=1 SV=2                                                      | LUM_HUMAN        | 38 kDa           | 9                         | 34%                 |
| 717 | Ig lambda chain V-I region HA OS=Homo sapiens PE=1 SV=1                                       | LV102_HUMAN      | 12 kDa           | 2                         | 23%                 |
| 718 | Ig lambda chain V-I region NEW OS=Homo sapiens PE=1 SV=1                                      | LV103_HUMAN      | 11 kDa           | 2                         | 26%                 |
| 719 | Ig lambda chain V-I region NIG-64 OS=Homo sapiens PE=1 SV=1                                   | LV104_HUMAN (+1) | 11 kDa           | 2                         | 19%                 |
| 720 | Ig lambda chain V-I region NEWM OS=Homo sapiens PE=1 SV=1                                     | LV105_HUMAN      | 11 kDa           | 3                         | 22%                 |
| 721 | Ig lambda chain V-II region TRO OS=Homo sapiens PE=1 SV=1                                     | LV204_HUMAN      | 12 kDa           | 3                         | 28%                 |
| 722 | Ig lambda chain V-III region SH OS=Homo sapiens PE=1 SV=1                                     | LV301_HUMAN      | 11 kDa           | 3                         | 34%                 |
| 723 | Ig lambda chain V-III region LOI OS=Homo sapiens PE=1 SV=1                                    | LV302_HUMAN      | 12 kDa           | 4                         | 46%                 |
| 724 | Ig lambda chain V-VI region SUT OS=Homo sapiens PE=1 SV=1                                     | LV603_HUMAN      | 12 kDa           | 4                         | 37%                 |
| 725 | Lymphocyte antigen 96 OS=Homo sapiens GN=LY96 PE=1 SV=2                                       | LY96_HUMAN       | 19 kDa           | 3                         | 22%                 |
| 726 | Lysosomal alpha-glucosidase OS=Homo sapiens GN=GAA PE=1 SV=4                                  | LYAG_HUMAN       | 105 kDa          | 4                         | 7.00%               |
| 727 | Tyrosine-protein kinase Lyn OS=Homo sapiens GN=LYN PE=1 SV=3                                  | LYN_HUMAN        | 59 kDa           | 3                         | 5.10%               |
| 728 | Acyl-protein thioesterase 1 OS=Homo sapiens GN=LYPLA1 PE=1 SV=1                               | LYPA1_HUMAN      | 25 kDa           | 6                         | 34%                 |
| 729 | Acyl-protein thioesterase 2 OS=Homo sapiens GN=LYPLA2 PE=1 SV=1                               | LYPA2_HUMAN      | 25 kDa           | 4                         | 19%                 |
| 730 | Ly6/PLAUR domain-containing protein 3 OS=Homo sapiens GN=LYPD3 PE=1 SV=2                      | LYPD3_HUMAN      | 36 kDa           | 6                         | 23%                 |
| 731 | Lysozyme C OS=Homo sapiens GN=LYZ PE=1 SV=1                                                   | LYSC_HUMAN       | 17 kDa           | 14                        | 71%                 |
| 732 | Protein LZIC OS=Homo sapiens GN=LZIC PE=1 SV=1                                                | LZIC_HUMAN       | 21 kDa           | 2                         | 8.90%               |
| 733 | Mannosyl-oligosaccharide 1,2-alpha-mannosidase 1A OS=Homo sapiens GN=MAN1A1 PE=1 SV=3         | MA1A1_HUMAN      | 73 kDa           | 13                        | 21%                 |
| 734 | Alpha-mannosidase 2 OS=Homo sapiens GN=MAN2A1 PE=1 SV=2                                       | MA2A1_HUMAN      | 131 kDa          | 7                         | 6.60%               |
| 735 | Lysosomal alpha-mannosidase OS=Homo sapiens GN=MAN2B1 PE=1 SV=3                               | MA2B1_HUMAN      | 114 kDa          | 10                        | 11%                 |
| 736 | Epididymis-specific alpha-mannosidase OS=Homo sapiens GN=MAN2B2 PE=1 SV=4                     | MA2B2_HUMAN      | 114 kDa          | 3                         | 4.10%               |
| 737 | Maleylacetoacetate isomerase OS=Homo sapiens GN=GSTZ1 PE=1 SV=3                               | MAA1_HUMAN       | 24 kDa           | 2                         | 11%                 |
| 738 | Microtubule-actin cross-linking factor 1, isoforms 1/2/3/5 OS=Homo sapiens GN=MACF1 PE=1 SV=4 | MACF1_HUMAN      | 838 kDa          | 2                         | 0.26%               |
| 739 | Beta-mannosidase OS=Homo sapiens GN=MANBA PE=1 SV=3                                           | MANBA_HUMAN      | 101 kDa          | 16                        | 22%                 |
| 740 | NADP-dependent malic enzyme OS=Homo sapiens GN=ME1 PE=1 SV=1                                  | MAOX_HUMAN       | 64 kDa           | 8                         | 17%                 |
| 741 | Myristoylated alanine-rich C-kinase substrate OS=Homo sapiens GN=MARCKS PE=1 SV=4             | MARCS_HUMAN      | 32 kDa           | 9                         | 39%                 |
| 742 | Matrilin-2 OS=Homo sapiens GN=MATN2 PE=1 SV=4                                                 | MATN2_HUMAN      | 107 kDa          | 14                        | 17%                 |
| 743 | Matrilin-3 OS=Homo sapiens GN=MATN3 PE=1 SV=2                                                 | MATN3_HUMAN      | 53 kDa           | 17                        | 50%                 |
| 744 | Myelin basic protein OS=Homo sapiens GN=MBP PE=1 SV=3                                         | MBP_HUMAN        | 33 kDa           | 2                         | 15%                 |
| 745 | Malignant T cell-amplified sequence 1 OS=Homo sapiens GN=MCTS1 PE=1 SV=1                      | MCTS1_HUMAN      | 21 kDa           | 2                         | 20%                 |
| 746 | Malate dehydrogenase, cytoplasmic OS=Homo sapiens GN=MDH1 PE=1 SV=4                           | MDHC_HUMAN       | 36 kDa           | 16                        | 45%                 |
| 747 | Malate dehydrogenase, mitochondrial OS=Homo sapiens GN=MDH2 PE=1 SV=3                         | MDHM_HUMAN       | 36 kDa           | 3                         | 15%                 |
| 748 | LDLR chaperone MESD OS=Homo sapiens GN=MESDC2 PE=1 SV=2                                       | MESD_HUMAN       | 26 kDa           | 3                         | 11%                 |
| 749 | Methyltransferase-like protein 7A OS=Homo sapiens GN=METTL7A PE=1 SV=1                        | MET7A_HUMAN      | 28 kDa           | 2                         | 11%                 |
| 750 | S-adenosylmethionine synthase isoform type-2 OS=Homo sapiens GN=MAT2A PE=1 SV=1               | METK2_HUMAN      | 44 kDa           | 2                         | 6.10%               |
| 751 | Lactadherin OS=Homo sapiens GN=MFG8 PE=1 SV=2                                                 | MFGM_HUMAN       | 43 kDa           | 27                        | 79%                 |

| #   | Proteins                                                                                                  | Uniprot ID       | Molecular Weight | Number of unique peptides | Percent of coverage |
|-----|-----------------------------------------------------------------------------------------------------------|------------------|------------------|---------------------------|---------------------|
| 752 | Alpha-1,3-mannosyl-glycoprotein 2-beta-N-acetylglucosaminyltransferase OS=Homo sapiens GN=MGAT1 PE=2 SV=2 | MGAT1_HUMAN      | 51 kDa           | 2                         | 5.60%               |
| 753 | Melanoma inhibitory activity protein 3 OS=Homo sapiens GN=MIA3 PE=1 SV=1                                  | MIA3_HUMAN       | 214 kDa          | 3                         | 2.30%               |
| 754 | Multiple inositol polyphosphate phosphatase 1 OS=Homo sapiens GN=MINPP1 PE=1 SV=1                         | MINP1_HUMAN      | 55 kDa           | 5                         | 11%                 |
| 755 | Midkine OS=Homo sapiens GN=MDK PE=1 SV=1                                                                  | MK_HUMAN         | 16 kDa           | 3                         | 25%                 |
| 756 | Mitogen-activated protein kinase 1 OS=Homo sapiens GN=MAPK1 PE=1 SV=3                                     | MK01_HUMAN       | 41 kDa           | 3                         | 9.40%               |
| 757 | Mitogen-activated protein kinase 13 OS=Homo sapiens GN=MAPK13 PE=1 SV=1                                   | MK13_HUMAN       | 42 kDa           | 4                         | 12%                 |
| 758 | Myosin regulatory light chain 12A OS=Homo sapiens GN=MYL12A PE=1 SV=2                                     | ML12A_HUMAN (+1) | 20 kDa           | 6                         | 40%                 |
| 759 | Matrilysin OS=Homo sapiens GN=MMP7 PE=1 SV=1                                                              | MMP7_HUMAN       | 30 kDa           | 2                         | 8.20%               |
| 760 | Moesin OS=Homo sapiens GN=MSN PE=1 SV=3                                                                   | MOES_HUMAN       | 68 kDa           | 31                        | 52%                 |
| 761 | Dual specificity mitogen-activated protein kinase kinase 1 OS=Homo sapiens GN=MAP2K1 PE=1 SV=2            | MP2K1_HUMAN      | 43 kDa           | 5                         | 13%                 |
| 762 | Mannose-6-phosphate isomerase OS=Homo sapiens GN=MPI PE=1 SV=2                                            | MPI_HUMAN        | 47 kDa           | 3                         | 7.10%               |
| 763 | Cation-independent mannose-6-phosphate receptor OS=Homo sapiens GN=IGF2R PE=1 SV=3                        | MPRI_HUMAN       | 274 kDa          | 11                        | 5.70%               |
| 764 | Macrophage mannose receptor 1 OS=Homo sapiens GN=MRC1 PE=1 SV=1                                           | MRC1_HUMAN       | 166 kDa          | 85                        | 56%                 |
| 765 | MARCKS-related protein OS=Homo sapiens GN=MARCKSL1 PE=1 SV=2                                              | MRP_HUMAN        | 20 kDa           | 5                         | 60%                 |
| 766 | Multidrug resistance-associated protein 7 OS=Homo sapiens GN=ABCC10 PE=1 SV=1                             | MRP7_HUMAN       | 162 kDa          | 2                         | 1.90%               |
| 767 | Mitochondrial peptide methionine sulfoxide reductase OS=Homo sapiens GN=MSRA PE=1 SV=1                    | MSRA_HUMAN       | 26 kDa           | 4                         | 20%                 |
| 768 | S-methyl-5'-thioadenosine phosphorylase OS=Homo sapiens GN=MTAP PE=1 SV=2                                 | MTAP_HUMAN       | 31 kDa           | 8                         | 37%                 |
| 769 | Myotrophin OS=Homo sapiens GN=MTPN PE=1 SV=2                                                              | MTPN_HUMAN       | 13 kDa           | 2                         | 21%                 |
| 770 | Mucin-1 OS=Homo sapiens GN=MUC1 PE=1 SV=3                                                                 | MUC1_HUMAN       | 122 kDa          | 9                         | 8.50%               |
| 771 | Cell surface glycoprotein MUC18 OS=Homo sapiens GN=MCAM PE=1 SV=2                                         | MUC18_HUMAN      | 72 kDa           | 2                         | 4.00%               |
| 772 | Mucin-20 OS=Homo sapiens GN=MUC20 PE=1 SV=3                                                               | MUC20_HUMAN      | 72 kDa           | 4                         | 7.90%               |
| 773 | Mucin-4 OS=Homo sapiens GN=MUC4 PE=1 SV=4                                                                 | MUC4_HUMAN       | 232 kDa          | 23                        | 16%                 |
| 774 | Ig mu heavy chain disease protein OS=Homo sapiens PE=1 SV=1                                               | MUCB_HUMAN       | 43 kDa           | 2                         | 50%                 |
| 775 | Mucin-like protein 1 OS=Homo sapiens GN=MUCL1 PE=1 SV=1                                                   | MUCL1_HUMAN      | 9 kDa            | 2                         | 18%                 |
| 776 | Diphosphomevalonate decarboxylase OS=Homo sapiens GN=MVD PE=1 SV=1                                        | MVD1_HUMAN       | 43 kDa           | 6                         | 19%                 |
| 777 | Myosin-9 OS=Homo sapiens GN=MYH9 PE=1 SV=4                                                                | MYH9_HUMAN       | 227 kDa          | 31                        | 19%                 |
| 778 | Myosin light polypeptide 6 OS=Homo sapiens GN=MYL6 PE=1 SV=2                                              | MYL6_HUMAN       | 17 kDa           | 9                         | 66%                 |
| 779 | Myosin-Ic OS=Homo sapiens GN=MYO1C PE=1 SV=4                                                              | MYO1C_HUMAN      | 122 kDa          | 5                         | 5.10%               |
| 780 | Myoferlin OS=Homo sapiens GN=MYOF PE=1 SV=1                                                               | MYOF_HUMAN       | 235 kDa          | 5                         | 2.60%               |
| 781 | N-alpha-acetyltransferase 15, NatA auxiliary subunit OS=Homo sapiens GN=NAA15 PE=1 SV=1                   | NAA15_HUMAN      | 101 kDa          | 2                         | 2.90%               |
| 782 | Nascent polypeptide-associated complex subunit alpha OS=Homo sapiens GN=NACA PE=1 SV=1                    | NACA_HUMAN       | 23 kDa           | 5                         | 29%                 |
| 783 | Nicotinate-nucleotide pyrophosphorylase [carboxylating] OS=Homo sapiens GN=QPRT PE=1 SV=3                 | NADC_HUMAN       | 31 kDa           | 3                         | 11%                 |
| 784 | N-acetyl-D-glucosamine kinase OS=Homo sapiens GN=NAGK PE=1 SV=4                                           | NAGK_HUMAN       | 37 kDa           | 6                         | 24%                 |
| 785 | Nicotinamide phosphoribosyltransferase OS=Homo sapiens GN=NAMPT PE=1 SV=1                                 | NAMPT_HUMAN      | 56 kDa           | 26                        | 67%                 |
| 786 | N-acetyltransferase 10 OS=Homo sapiens GN=NAT10 PE=1 SV=2                                                 | NAT10_HUMAN      | 116 kDa          | 2                         | 2.40%               |
| 787 | Non-specific cytotoxic cell receptor protein 1 homolog OS=Homo sapiens GN=NCCRP1 PE=1 SV=1                | NCRP1_HUMAN      | 31 kDa           | 2                         | 18%                 |
| 788 | Nucleoside diphosphate kinase A OS=Homo sapiens GN=NME1 PE=1 SV=1                                         | NDKA_HUMAN       | 17 kDa           | 6                         | 70%                 |
| 789 | Nucleoside diphosphate kinase B OS=Homo sapiens GN=NME2 PE=1 SV=1                                         | NDKB_HUMAN       | 17 kDa           | 10                        | 65%                 |
| 790 | Protein NDRG1 OS=Homo sapiens GN=NDRG1 PE=1 SV=1                                                          | NDRG1_HUMAN      | 43 kDa           | 6                         | 24%                 |

| #   | Proteins                                                                                           | Uniprot ID       | Molecular Weight | Number of unique peptides | Percent of coverage |
|-----|----------------------------------------------------------------------------------------------------|------------------|------------------|---------------------------|---------------------|
| 791 | Protein NDRG2 OS=Homo sapiens GN=NDRG2 PE=1 SV=2                                                   | NDRG2_HUMAN      | 41 kDa           | 6                         | 20%                 |
| 792 | Protein NDRG3 OS=Homo sapiens GN=NDRG3 PE=1 SV=2                                                   | NDRG3_HUMAN      | 41 kDa           | 2                         | 8.50%               |
| 793 | Bifunctional heparan sulfate N-deacetylase/N-sulfotransferase 1 OS=Homo sapiens GN=NDST1 PE=1 SV=1 | NDST1_HUMAN      | 101 kDa          | 5                         | 6.50%               |
| 794 | Nebulin OS=Homo sapiens GN=NEB PE=1 SV=4                                                           | NEBU_HUMAN       | 773 kDa          | 2                         | 0.39%               |
| 795 | Neudesin OS=Homo sapiens GN=NENF PE=1 SV=1                                                         | NENF_HUMAN       | 19 kDa           | 2                         | 11%                 |
| 796 | Neogenin OS=Homo sapiens GN=NEO1 PE=1 SV=2                                                         | NEO1_HUMAN       | 160 kDa          | 3                         | 2.70%               |
| 797 | Sialidase-1 OS=Homo sapiens GN=NEU1 PE=1 SV=1                                                      | NEUR1_HUMAN      | 45 kDa           | 12                        | 33%                 |
| 798 | Neuroserpin OS=Homo sapiens GN=SERPINI1 PE=1 SV=1                                                  | NEUS_HUMAN       | 46 kDa           | 6                         | 19%                 |
| 799 | Neutrophil gelatinase-associated lipocalin OS=Homo sapiens GN=LCN2 PE=1 SV=2                       | NGAL_HUMAN       | 23 kDa           | 2                         | 14%                 |
| 800 | NHL repeat-containing protein 2 OS=Homo sapiens GN=NHLRC2 PE=1 SV=1                                | NHLC2_HUMAN      | 79 kDa           | 5                         | 8.00%               |
| 801 | Na(+)/H(+) exchange regulatory cofactor NHE-RF1 OS=Homo sapiens GN=SLC9A3R1 PE=1 SV=4              | NHRF1_HUMAN      | 39 kDa           | 19                        | 60%                 |
| 802 | Na(+)/H(+) exchange regulatory cofactor NHE-RF2 OS=Homo sapiens GN=SLC9A3R2 PE=1 SV=2              | NHRF2_HUMAN      | 37 kDa           | 4                         | 15%                 |
| 803 | Niban-like protein 1 OS=Homo sapiens GN=FAM129B PE=1 SV=2                                          | NIBL1_HUMAN      | 83 kDa           | 13                        | 22%                 |
| 804 | Nidogen-1 OS=Homo sapiens GN=NID1 PE=1 SV=3                                                        | NID1_HUMAN       | 136 kDa          | 8                         | 7.40%               |
| 805 | Omega-amidase NIT2 OS=Homo sapiens GN=NIT2 PE=1 SV=1                                               | NIT2_HUMAN       | 31 kDa           | 5                         | 23%                 |
| 806 | Non-specific lipid-transfer protein OS=Homo sapiens GN=SCP2 PE=1 SV=2                              | NLTP_HUMAN       | 59 kDa           | 10                        | 17%                 |
| 807 | Glycylpeptide N-tetradecanoyltransferase 1 OS=Homo sapiens GN=NMT1 PE=1 SV=2                       | NMT1_HUMAN       | 57 kDa           | 4                         | 12%                 |
| 808 | Nucleolar protein 3 OS=Homo sapiens GN=NOL3 PE=1 SV=1                                              | NOL3_HUMAN       | 24 kDa           | 2                         | 8.20%               |
| 809 | Nodal modulator 1 OS=Homo sapiens GN=NOMO1 PE=1 SV=5                                               | NOMO1_HUMAN (+2) | 134 kDa          | 5                         | 4.80%               |
| 810 | Nucleosome assembly protein 1-like 1 OS=Homo sapiens GN=NAP1L1 PE=1 SV=1                           | NP1L1_HUMAN      | 45 kDa           | 5                         | 22%                 |
| 811 | Nucleosome assembly protein 1-like 4 OS=Homo sapiens GN=NAP1L4 PE=1 SV=1                           | NP1L4_HUMAN      | 43 kDa           | 5                         | 15%                 |
| 812 | Epididymal secretory protein E1 OS=Homo sapiens GN=NPC2 PE=1 SV=1                                  | NPC2_HUMAN       | 17 kDa           | 7                         | 62%                 |
| 813 | Neural proliferation differentiation and control protein 1 OS=Homo sapiens GN=NPDC1 PE=1 SV=2      | NPDC1_HUMAN      | 35 kDa           | 2                         | 12%                 |
| 814 | Nephronectin OS=Homo sapiens GN=NPNT PE=2 SV=3                                                     | NPNT_HUMAN       | 62 kDa           | 8                         | 14%                 |
| 815 | Sodium-dependent phosphate transport protein 2B OS=Homo sapiens GN=SLC34A2 PE=1 SV=3               | NPT2B_HUMAN      | 76 kDa           | 6                         | 8.10%               |
| 816 | Ribosyl-dihydroxynicotinamide dehydrogenase [quinone] OS=Homo sapiens GN=NQO2 PE=1 SV=5            | NQO2_HUMAN       | 26 kDa           | 4                         | 17%                 |
| 817 | Neuropilin-1 OS=Homo sapiens GN=NRP1 PE=1 SV=3                                                     | NRP1_HUMAN       | 103 kDa          | 10                        | 15%                 |
| 818 | Vesicle-fusing ATPase OS=Homo sapiens GN=NSF PE=1 SV=3                                             | NSF_HUMAN        | 83 kDa           | 2                         | 3.10%               |
| 819 | NSFL1 cofactor p47 OS=Homo sapiens GN=NSFL1C PE=1 SV=2                                             | NSF1C_HUMAN      | 41 kDa           | 7                         | 26%                 |
| 820 | 5'-nucleotidase domain-containing protein 1 OS=Homo sapiens GN=NT5DC1 PE=1 SV=1                    | NT5D1_HUMAN      | 52 kDa           | 2                         | 6.20%               |
| 821 | Nuclear transport factor 2 OS=Homo sapiens GN=NUTF2 PE=1 SV=1                                      | NTF2_HUMAN       | 14 kDa           | 3                         | 24%                 |
| 822 | Cytosolic Fe-S cluster assembly factor NUBP1 OS=Homo sapiens GN=NUBP1 PE=1 SV=2                    | NUBP1_HUMAN      | 35 kDa           | 2                         | 8.10%               |
| 823 | Nucleobindin-1 OS=Homo sapiens GN=NUCB1 PE=1 SV=4                                                  | NUCB1_HUMAN      | 54 kDa           | 35                        | 70%                 |
| 824 | Nucleobindin-2 OS=Homo sapiens GN=NUCB2 PE=1 SV=2                                                  | NUCB2_HUMAN      | 50 kDa           | 27                        | 60%                 |
| 825 | Nuclear migration protein nudC OS=Homo sapiens GN=NUDC PE=1 SV=1                                   | NUDC_HUMAN       | 38 kDa           | 3                         | 11%                 |
| 826 | ADP-sugar pyrophosphatase OS=Homo sapiens GN=NUDT5 PE=1 SV=1                                       | NUDT5_HUMAN      | 24 kDa           | 4                         | 22%                 |
| 827 | Protein NOXP20 OS=Homo sapiens GN=FAM114A1 PE=1 SV=2                                               | NXP20_HUMAN      | 61 kDa           | 3                         | 5.90%               |
| 828 | Occludin OS=Homo sapiens GN=OCLN PE=1 SV=1                                                         | OCLN_HUMAN       | 59 kDa           | 4                         | 9.20%               |
| 829 | Obg-like ATPase 1 OS=Homo sapiens GN=OLA1 PE=1 SV=2                                                | OLA1_HUMAN       | 45 kDa           | 3                         | 8.80%               |
| 830 | Olfactomedin-4 OS=Homo sapiens GN=OLFM4 PE=1 SV=1                                                  | OLFM4_HUMAN      | 57 kDa           | 11                        | 22%                 |

| #   | Proteins                                                                                               | Uniprot ID  | Molecular Weight | Number of unique peptides | Percent of coverage |
|-----|--------------------------------------------------------------------------------------------------------|-------------|------------------|---------------------------|---------------------|
| 831 | Protein OS-9 OS=Homo sapiens GN=OS9 PE=1 SV=1                                                          | OS9_HUMAN   | 76 kDa           | 14                        | 25%                 |
| 832 | Oxysterol-binding protein 1 OS=Homo sapiens GN=OSBP PE=1 SV=1                                          | OSBP1_HUMAN | 89 kDa           | 5                         | 6.40%               |
| 833 | Oncostatin-M-specific receptor subunit beta OS=Homo sapiens GN=OSMR PE=1 SV=1                          | OSMR_HUMAN  | 111 kDa          | 7                         | 7.50%               |
| 834 | Osteoclast-stimulating factor 1 OS=Homo sapiens GN=OSTF1 PE=1 SV=2                                     | OSTF1_HUMAN | 24 kDa           | 2                         | 14%                 |
| 835 | Osteopontin OS=Homo sapiens GN=SPP1 PE=1 SV=1                                                          | OSTP_HUMAN  | 35 kDa           | 16                        | 59%                 |
| 836 | Ubiquitin thioesterase OTUB1 OS=Homo sapiens GN=OTUB1 PE=1 SV=2                                        | OTUB1_HUMAN | 31 kDa           | 4                         | 19%                 |
| 837 | Serine/threonine-protein kinase OSR1 OS=Homo sapiens GN=OXSR1 PE=1 SV=1                                | OXSR1_HUMAN | 58 kDa           | 3                         | 7.20%               |
| 838 | Phosphoinositide-3-kinase-interacting protein 1 OS=Homo sapiens GN=PIK3IP1 PE=1 SV=2                   | P3IP1_HUMAN | 28 kDa           | 5                         | 21%                 |
| 839 | Platelet-activating factor acetylhydrolase IB subunit beta OS=Homo sapiens GN=PAFAH1B2 PE=1 SV=1       | PA1B2_HUMAN | 26 kDa           | 3                         | 22%                 |
| 840 | Platelet-activating factor acetylhydrolase IB subunit gamma OS=Homo sapiens GN=PAFAH1B3 PE=1 SV=1      | PA1B3_HUMAN | 26 kDa           | 2                         | 7.80%               |
| 841 | Group 3 secretory phospholipase A2 OS=Homo sapiens GN=PLA2G3 PE=1 SV=2                                 | PA2G3_HUMAN | 57 kDa           | 3                         | 7.70%               |
| 842 | Proliferation-associated protein 2G4 OS=Homo sapiens GN=PA2G4 PE=1 SV=3                                | PA2G4_HUMAN | 44 kDa           | 10                        | 31%                 |
| 843 | Polyadenylate-binding protein 1 OS=Homo sapiens GN=PABPC1 PE=1 SV=2                                    | PABP1_HUMAN | 71 kDa           | 19                        | 34%                 |
| 844 | Polyadenylate-binding protein 4 OS=Homo sapiens GN=PABPC4 PE=1 SV=1                                    | PABP4_HUMAN | 71 kDa           | 2                         | 15%                 |
| 845 | Protein kinase C and casein kinase substrate in neurons protein 2 OS=Homo sapiens GN=PACSIN2 PE=1 SV=2 | PACN2_HUMAN | 56 kDa           | 3                         | 5.80%               |
| 846 | Protein kinase C and casein kinase substrate in neurons protein 3 OS=Homo sapiens GN=PACSIN3 PE=1 SV=2 | PACN3_HUMAN | 48 kDa           | 2                         | 5.40%               |
| 847 | Phosphofurin acidic cluster sorting protein 1 OS=Homo sapiens GN=PACS1 PE=1 SV=2                       | PACS1_HUMAN | 105 kDa          | 2                         | 3.10%               |
| 848 | Protein-arginine deiminase type-2 OS=Homo sapiens GN=PADI2 PE=1 SV=2                                   | PADI2_HUMAN | 76 kDa           | 2                         | 3.90%               |
| 849 | Group XV phospholipase A2 OS=Homo sapiens GN=PLA2G15 PE=1 SV=2                                         | PAG15_HUMAN | 47 kDa           | 2                         | 5.60%               |
| 850 | Polyadenylate-binding protein-interacting protein 1 OS=Homo sapiens GN=PAIP1 PE=1 SV=1                 | PAIP1_HUMAN | 54 kDa           | 7                         | 14%                 |
| 851 | Plasminogen activator inhibitor 1 RNA-binding protein OS=Homo sapiens GN=SERBP1 PE=1 SV=2              | PAIRB_HUMAN | 45 kDa           | 5                         | 15%                 |
| 852 | Serine/threonine-protein kinase PAK 2 OS=Homo sapiens GN=PAK2 PE=1 SV=3                                | PAK2_HUMAN  | 58 kDa           | 5                         | 11%                 |
| 853 | Serine/threonine-protein kinase PAK 4 OS=Homo sapiens GN=PAK4 PE=1 SV=1                                | PAK4_HUMAN  | 64 kDa           | 2                         | 4.20%               |
| 854 | Paralemmin-3 OS=Homo sapiens GN=PALM3 PE=1 SV=2                                                        | PALM3_HUMAN | 72 kDa           | 2                         | 3.70%               |
| 855 | Protein DJ-1 OS=Homo sapiens GN=PARK7 PE=1 SV=2                                                        | PARK7_HUMAN | 20 kDa           | 16                        | 83%                 |
| 856 | Purkinje cell protein 4-like protein 1 OS=Homo sapiens GN=PCP4L1 PE=2 SV=3                             | PC4L1_HUMAN | 7 kDa            | 2                         | 32%                 |
| 857 | Poly(rC)-binding protein 1 OS=Homo sapiens GN=PCBP1 PE=1 SV=2                                          | PCBP1_HUMAN | 37 kDa           | 11                        | 42%                 |
| 858 | Poly(rC)-binding protein 2 OS=Homo sapiens GN=PCBP2 PE=1 SV=1                                          | PCBP2_HUMAN | 39 kDa           | 3                         | 23%                 |
| 859 | Procollagen C-endopeptidase enhancer 1 OS=Homo sapiens GN=PCOLCE PE=1 SV=2                             | PCOC1_HUMAN | 48 kDa           | 2                         | 5.80%               |
| 860 | Lysosomal Pro-X carboxypeptidase OS=Homo sapiens GN=PRCP PE=1 SV=1                                     | PCP_HUMAN   | 56 kDa           | 2                         | 6.20%               |
| 861 | Proprotein convertase subtilisin/kexin type 6 OS=Homo sapiens GN=PCSK6 PE=1 SV=1                       | PCSK6_HUMAN | 106 kDa          | 2                         | 3.00%               |
| 862 | Ethanolamine-phosphate cytidyltransferase OS=Homo sapiens GN=PCYT2 PE=1 SV=1                           | PCYT2_HUMAN | 44 kDa           | 6                         | 19%                 |
| 863 | Programmed cell death 6-interacting protein OS=Homo sapiens GN=PDCD6IP PE=1 SV=1                       | PDC6I_HUMAN | 96 kDa           | 24                        | 27%                 |
| 864 | Programmed cell death protein 4 OS=Homo sapiens GN=PDCD4 PE=1 SV=2                                     | PDCD4_HUMAN | 52 kDa           | 6                         | 15%                 |
| 865 | Programmed cell death protein 5 OS=Homo sapiens GN=PDCD5 PE=1 SV=3                                     | PDCD5_HUMAN | 14 kDa           | 4                         | 38%                 |
| 866 | Protein disulfide-isomerase OS=Homo sapiens GN=P4HB PE=1 SV=3                                          | PDIA1_HUMAN | 57 kDa           | 34                        | 66%                 |
| 867 | Protein disulfide-isomerase A3 OS=Homo sapiens GN=PDIA3 PE=1 SV=4                                      | PDIA3_HUMAN | 57 kDa           | 25                        | 47%                 |
| 868 | Protein disulfide-isomerase A4 OS=Homo sapiens GN=PDIA4 PE=1 SV=2                                      | PDIA4_HUMAN | 73 kDa           | 13                        | 21%                 |
| 869 | Protein disulfide-isomerase A6 OS=Homo sapiens GN=PDIA6 PE=1 SV=1                                      | PDIA6_HUMAN | 48 kDa           | 4                         | 12%                 |

| #   | Proteins                                                                                                | Uniprot ID  | Molecular Weight | Number of unique peptides | Percent of coverage |
|-----|---------------------------------------------------------------------------------------------------------|-------------|------------------|---------------------------|---------------------|
| 870 | PDZ and LIM domain protein 5 OS=Homo sapiens GN=PDLIM5 PE=1 SV=5                                        | PDLI5_HUMAN | 64 kDa           | 4                         | 11%                 |
| 871 | Pyridoxal kinase OS=Homo sapiens GN=PDXK PE=1 SV=1                                                      | PDXK_HUMAN  | 35 kDa           | 10                        | 31%                 |
| 872 | Podocalyxin-like protein 2 OS=Homo sapiens GN=PODXL2 PE=1 SV=1                                          | PDXL2_HUMAN | 65 kDa           | 2                         | 3.60%               |
| 873 | PDZK1-interacting protein 1 OS=Homo sapiens GN=PDZK1IP1 PE=1 SV=1                                       | PDZ11_HUMAN | 12 kDa           | 2                         | 26%                 |
| 874 | Astrocytic phosphoprotein PEA-15 OS=Homo sapiens GN=PEA15 PE=1 SV=2                                     | PEA15_HUMAN | 15 kDa           | 4                         | 45%                 |
| 875 | Phosphatidylethanolamine-binding protein 1 OS=Homo sapiens GN=PEBP1 PE=1 SV=3                           | PEBP1_HUMAN | 21 kDa           | 12                        | 83%                 |
| 876 | Phosphatidylethanolamine-binding protein 4 OS=Homo sapiens GN=PEBP4 PE=1 SV=3                           | PEBP4_HUMAN | 26 kDa           | 2                         | 7.90%               |
| 877 | Pigment epithelium-derived factor OS=Homo sapiens GN=SERPINF1 PE=1 SV=4                                 | PEDF_HUMAN  | 46 kDa           | 16                        | 46%                 |
| 878 | Xaa-Pro dipeptidase OS=Homo sapiens GN=PEPD PE=1 SV=3                                                   | PEPD_HUMAN  | 55 kDa           | 2                         | 3.70%               |
| 879 | Periplakin OS=Homo sapiens GN=PPL PE=1 SV=4                                                             | PEPL_HUMAN  | 205 kDa          | 2                         | 1.30%               |
| 880 | Lactoperoxidase OS=Homo sapiens GN=LPO PE=1 SV=2                                                        | PERL_HUMAN  | 80 kDa           | 31                        | 50%                 |
| 881 | Prefoldin subunit 2 OS=Homo sapiens GN=PFDN2 PE=1 SV=1                                                  | PFD2_HUMAN  | 17 kDa           | 3                         | 23%                 |
| 882 | Prefoldin subunit 3 OS=Homo sapiens GN=VBP1 PE=1 SV=3                                                   | PFD3_HUMAN  | 23 kDa           | 2                         | 13%                 |
| 883 | Prefoldin subunit 5 OS=Homo sapiens GN=PFDN5 PE=1 SV=2                                                  | PFD5_HUMAN  | 17 kDa           | 3                         | 33%                 |
| 884 | Prefoldin subunit 6 OS=Homo sapiens GN=PFDN6 PE=1 SV=1                                                  | PFD6_HUMAN  | 15 kDa           | 3                         | 14%                 |
| 885 | Phosphoglycerate mutase 1 OS=Homo sapiens GN=PGAM1 PE=1 SV=2                                            | PGAM1_HUMAN | 29 kDa           | 12                        | 60%                 |
| 886 | Basement membrane-specific heparan sulfate proteoglycan core protein OS=Homo sapiens GN=HSPG2 PE=1 SV=4 | PGBM_HUMAN  | 469 kDa          | 3                         | 0.91%               |
| 887 | Plasma glutamate carboxypeptidase OS=Homo sapiens GN=PGCP PE=1 SV=1                                     | PGCP_HUMAN  | 52 kDa           | 9                         | 25%                 |
| 888 | Phosphoglycerate kinase 1 OS=Homo sapiens GN=PGK1 PE=1 SV=3                                             | PGK1_HUMAN  | 45 kDa           | 28                        | 73%                 |
| 889 | Phosphoglucomutase-1 OS=Homo sapiens GN=PGM1 PE=1 SV=3                                                  | PGM1_HUMAN  | 61 kDa           | 33                        | 70%                 |
| 890 | Phosphoglucomutase-2 OS=Homo sapiens GN=PGM2 PE=1 SV=4                                                  | PGM2_HUMAN  | 68 kDa           | 13                        | 25%                 |
| 891 | Membrane-associated progesterone receptor component 1 OS=Homo sapiens GN=PGRMC1 PE=1 SV=3               | PGRC1_HUMAN | 22 kDa           | 3                         | 17%                 |
| 892 | N-acetylmuramoyl-L-alanine amidase OS=Homo sapiens GN=PGLYRP2 PE=1 SV=1                                 | PGRP2_HUMAN | 62 kDa           | 5                         | 13%                 |
| 893 | 14 kDa phosphohistidine phosphatase OS=Homo sapiens GN=PHPT1 PE=1 SV=1                                  | PHP14_HUMAN | 14 kDa           | 3                         | 26%                 |
| 894 | Pterin-4- $\alpha$ -carbinolamine dehydratase OS=Homo sapiens GN=PCBD1 PE=1 SV=2                        | PHS_HUMAN   | 12 kDa           | 7                         | 64%                 |
| 895 | Phosphatidylinositol-5-phosphate 4-kinase type-2 gamma OS=Homo sapiens GN=PIP4K2C PE=1 SV=3             | PI42C_HUMAN | 47 kDa           | 4                         | 12%                 |
| 896 | Phosphatidylinositol 4-kinase alpha OS=Homo sapiens GN=PI4KA PE=1 SV=3                                  | PI4KA_HUMAN | 231 kDa          | 5                         | 3.90%               |
| 897 | Polymeric immunoglobulin receptor OS=Homo sapiens GN=PIGR PE=1 SV=4                                     | PIGR_HUMAN  | 83 kDa           | 55                        | 71%                 |
| 898 | Protein-L-isoaspartate(D-aspartate) O-methyltransferase OS=Homo sapiens GN=PCMT1 PE=1 SV=4              | PIMT_HUMAN  | 25 kDa           | 7                         | 35%                 |
| 899 | Prolactin-inducible protein OS=Homo sapiens GN=PIP PE=1 SV=1                                            | PIP_HUMAN   | 17 kDa           | 7                         | 57%                 |
| 900 | Phosphatidylinositol transfer protein alpha isoform OS=Homo sapiens GN=PITPNA PE=1 SV=2                 | PIPNA_HUMAN | 32 kDa           | 6                         | 25%                 |
| 901 | Phosphatidylinositol transfer protein beta isoform OS=Homo sapiens GN=PITPNB PE=1 SV=2                  | PIPNB_HUMAN | 32 kDa           | 3                         | 13%                 |
| 902 | Pirin OS=Homo sapiens GN=PIR PE=1 SV=1                                                                  | PIR_HUMAN   | 32 kDa           | 4                         | 16%                 |
| 903 | PITH domain-containing protein 1 OS=Homo sapiens GN=PITHD1 PE=1 SV=1                                    | PITH1_HUMAN | 24 kDa           | 2                         | 13%                 |
| 904 | Phospholipase A-2-activating protein OS=Homo sapiens GN=PLAA PE=1 SV=2                                  | PLAP_HUMAN  | 87 kDa           | 2                         | 4.30%               |
| 905 | Putative phospholipase B-like 2 OS=Homo sapiens GN=PLBD2 PE=1 SV=2                                      | PLBL2_HUMAN | 65 kDa           | 6                         | 11%                 |
| 906 | 1-phosphatidylinositol-4,5-bisphosphate phosphodiesterase gamma-2 OS=Homo sapiens GN=PLCG2 PE=1 SV=4    | PLCG2_HUMAN | 148 kDa          | 2                         | 1.20%               |
| 907 | Plectin OS=Homo sapiens GN=PLEC PE=1 SV=3                                                               | PLEC_HUMAN  | 532 kDa          | 3                         | 0.90%               |
| 908 | Perilipin-2 OS=Homo sapiens GN=PLIN2 PE=1 SV=2                                                          | PLIN2_HUMAN | 48 kDa           | 29                        | 75%                 |

| #   | Proteins                                                                                                    | Uniprot ID  | Molecular Weight | Number of unique peptides | Percent of coverage |
|-----|-------------------------------------------------------------------------------------------------------------|-------------|------------------|---------------------------|---------------------|
| 909 | Perilipin-3 OS=Homo sapiens GN=PLIN3 PE=1 SV=3                                                              | PLIN3_HUMAN | 47 kDa           | 27                        | 86%                 |
| 910 | Plasminogen OS=Homo sapiens GN=PLG PE=1 SV=2                                                                | PLMN_HUMAN  | 91 kDa           | 23                        | 33%                 |
| 911 | Procollagen-lysine,2-oxoglutarate 5-dioxygenase 1 OS=Homo sapiens GN=PLOD1 PE=1 SV=2                        | PLOD1_HUMAN | 84 kDa           | 16                        | 27%                 |
| 912 | Procollagen-lysine,2-oxoglutarate 5-dioxygenase 2 OS=Homo sapiens GN=PLOD2 PE=1 SV=2                        | PLOD2_HUMAN | 85 kDa           | 5                         | 7.30%               |
| 913 | Procollagen-lysine,2-oxoglutarate 5-dioxygenase 3 OS=Homo sapiens GN=PLOD3 PE=1 SV=1                        | PLOD3_HUMAN | 85 kDa           | 5                         | 9.30%               |
| 914 | Plastin-1 OS=Homo sapiens GN=PLS1 PE=1 SV=2                                                                 | PLS1_HUMAN  | 70 kDa           | 4                         | 10%                 |
| 915 | Plastin-2 OS=Homo sapiens GN=LCP1 PE=1 SV=6                                                                 | PLSL_HUMAN  | 70 kDa           | 21                        | 42%                 |
| 916 | Phospholipid transfer protein OS=Homo sapiens GN=PLTP PE=1 SV=1                                             | PLTP_HUMAN  | 55 kDa           | 11                        | 25%                 |
| 917 | Phosphomannomutase 2 OS=Homo sapiens GN=PMM2 PE=1 SV=1                                                      | PMM2_HUMAN  | 28 kDa           | 6                         | 26%                 |
| 918 | Nicotinate phosphoribosyltransferase OS=Homo sapiens GN=NAPRT1 PE=1 SV=2                                    | PNCB_HUMAN  | 58 kDa           | 9                         | 23%                 |
| 919 | Purine nucleoside phosphorylase OS=Homo sapiens GN=PNP PE=1 SV=2                                            | PNPH_HUMAN  | 32 kDa           | 18                        | 74%                 |
| 920 | Podocalyxin OS=Homo sapiens GN=PODXL PE=1 SV=2                                                              | PODXL_HUMAN | 59 kDa           | 8                         | 14%                 |
| 921 | Serum paraoxonase/arylesterase 1 OS=Homo sapiens GN=PON1 PE=1 SV=3                                          | PON1_HUMAN  | 40 kDa           | 9                         | 29%                 |
| 922 | Periostin OS=Homo sapiens GN=POSTN PE=1 SV=2                                                                | POSTN_HUMAN | 93 kDa           | 4                         | 7.30%               |
| 923 | Serine/threonine-protein phosphatase PP1-beta catalytic subunit OS=Homo sapiens GN=PPP1CB PE=1 SV=3         | PP1B_HUMAN  | 37 kDa           | 7                         | 32%                 |
| 924 | Protein phosphatase 1 regulatory subunit 7 OS=Homo sapiens GN=PPP1R7 PE=1 SV=1                              | PP1R7_HUMAN | 42 kDa           | 9                         | 29%                 |
| 925 | Serine/threonine-protein phosphatase 2A catalytic subunit alpha isoform OS=Homo sapiens GN=PPP2CA PE=1 SV=1 | PP2AA_HUMAN | 36 kDa           | 2                         | 6.10%               |
| 926 | Serine/threonine-protein phosphatase 2B catalytic subunit beta isoform OS=Homo sapiens GN=PPP3CB PE=1 SV=2  | PP2BB_HUMAN | 59 kDa           | 2                         | 3.40%               |
| 927 | Low molecular weight phosphotyrosine protein phosphatase OS=Homo sapiens GN=ACP1 PE=1 SV=3                  | PPAC_HUMAN  | 18 kDa           | 3                         | 22%                 |
| 928 | Prolyl endopeptidase OS=Homo sapiens GN=PREP PE=1 SV=2                                                      | PPCE_HUMAN  | 81 kDa           | 3                         | 6.20%               |
| 929 | Phosphopantothenate--cysteine ligase OS=Homo sapiens GN=PPCS PE=1 SV=2                                      | PPCS_HUMAN  | 34 kDa           | 3                         | 9.00%               |
| 930 | Lysosomal protective protein OS=Homo sapiens GN=CTSA PE=1 SV=2                                              | PPGB_HUMAN  | 54 kDa           | 4                         | 11%                 |
| 931 | Peptidyl-prolyl cis-trans isomerase A OS=Homo sapiens GN=PPIA PE=1 SV=2                                     | PPIA_HUMAN  | 18 kDa           | 15                        | 82%                 |
| 932 | Peptidyl-prolyl cis-trans isomerase B OS=Homo sapiens GN=PPIB PE=1 SV=2                                     | PPIB_HUMAN  | 24 kDa           | 14                        | 55%                 |
| 933 | Peptidyl-prolyl cis-trans isomerase C OS=Homo sapiens GN=PPIC PE=1 SV=1                                     | PPIC_HUMAN  | 23 kDa           | 5                         | 24%                 |
| 934 | Protein phosphatase 1A OS=Homo sapiens GN=PPM1A PE=1 SV=1                                                   | PPM1A_HUMAN | 42 kDa           | 4                         | 11%                 |
| 935 | Serine/threonine-protein phosphatase 5 OS=Homo sapiens GN=PPP5C PE=1 SV=1                                   | PPP5_HUMAN  | 57 kDa           | 3                         | 6.80%               |
| 936 | Palmitoyl-protein thioesterase 1 OS=Homo sapiens GN=PPT1 PE=1 SV=1                                          | PPT1_HUMAN  | 34 kDa           | 4                         | 14%                 |
| 937 | Peroxiredoxin-1 OS=Homo sapiens GN=PRDX1 PE=1 SV=1                                                          | PRDX1_HUMAN | 22 kDa           | 13                        | 61%                 |
| 938 | Peroxiredoxin-2 OS=Homo sapiens GN=PRDX2 PE=1 SV=5                                                          | PRDX2_HUMAN | 22 kDa           | 9                         | 48%                 |
| 939 | Peroxiredoxin-4 OS=Homo sapiens GN=PRDX4 PE=1 SV=1                                                          | PRDX4_HUMAN | 31 kDa           | 5                         | 31%                 |
| 940 | Peroxiredoxin-5, mitochondrial OS=Homo sapiens GN=PRDX5 PE=1 SV=4                                           | PRDX5_HUMAN | 22 kDa           | 8                         | 48%                 |
| 941 | Peroxiredoxin-6 OS=Homo sapiens GN=PRDX6 PE=1 SV=3                                                          | PRDX6_HUMAN | 25 kDa           | 17                        | 76%                 |
| 942 | Major prion protein OS=Homo sapiens GN=PRNP PE=1 SV=1                                                       | PRIO_HUMAN  | 28 kDa           | 2                         | 8.30%               |
| 943 | Prolactin OS=Homo sapiens GN=PRL PE=1 SV=1                                                                  | PRL_HUMAN   | 26 kDa           | 2                         | 11%                 |
| 944 | Vitamin K-dependent protein C OS=Homo sapiens GN=PROC PE=1 SV=1                                             | PROC_HUMAN  | 52 kDa           | 3                         | 7.60%               |
| 945 | Profilin-1 OS=Homo sapiens GN=PFN1 PE=1 SV=2                                                                | PROF1_HUMAN | 15 kDa           | 12                        | 91%                 |
| 946 | Prominin-1 OS=Homo sapiens GN=PROM1 PE=1 SV=1                                                               | PROM1_HUMAN | 97 kDa           | 13                        | 19%                 |
| 947 | Prominin-2 OS=Homo sapiens GN=PROM2 PE=1 SV=1                                                               | PROM2_HUMAN | 92 kDa           | 11                        | 18%                 |
| 948 | Vitamin K-dependent protein S OS=Homo sapiens GN=PROS1 PE=1 SV=1                                            | PROS_HUMAN  | 75 kDa           | 3                         | 3.40%               |



| #   | Proteins                                                                                     | Uniprot ID  | Molecular Weight | Number of unique peptides | Percent of coverage |
|-----|----------------------------------------------------------------------------------------------|-------------|------------------|---------------------------|---------------------|
| 949 | Proline synthase co-transcribed bacterial homolog protein OS=Homo sapiens GN=PROSC PE=1 SV=1 | PROSC_HUMAN | 30 kDa           | 4                         | 17%                 |
| 950 | Ribose-phosphate pyrophosphokinase 2 OS=Homo sapiens GN=PRPS2 PE=1 SV=2                      | PRPS2_HUMAN | 35 kDa           | 14                        | 50%                 |
| 951 | Protein PRRC1 OS=Homo sapiens GN=PRRC1 PE=1 SV=1                                             | PRRC1_HUMAN | 47 kDa           | 4                         | 9.70%               |
| 952 | 26S protease regulatory subunit 10B OS=Homo sapiens GN=PSMC6 PE=1 SV=1                       | PRS10_HUMAN | 44 kDa           | 3                         | 8.00%               |
| 953 | Serine protease 23 OS=Homo sapiens GN=PRSS23 PE=1 SV=1                                       | PRS23_HUMAN | 43 kDa           | 2                         | 6.30%               |
| 954 | 26S protease regulatory subunit 6A OS=Homo sapiens GN=PSMC3 PE=1 SV=3                        | PRS6A_HUMAN | 49 kDa           | 8                         | 21%                 |
| 955 | 26S protease regulatory subunit 6B OS=Homo sapiens GN=PSMC4 PE=1 SV=2                        | PRS6B_HUMAN | 47 kDa           | 6                         | 14%                 |
| 956 | 26S protease regulatory subunit 7 OS=Homo sapiens GN=PSMC2 PE=1 SV=3                         | PRS7_HUMAN  | 49 kDa           | 8                         | 22%                 |
| 957 | 26S protease regulatory subunit 8 OS=Homo sapiens GN=PSMC5 PE=1 SV=1                         | PRS8_HUMAN  | 46 kDa           | 8                         | 26%                 |
| 958 | Prostasin OS=Homo sapiens GN=PRSS8 PE=1 SV=1                                                 | PRSS8_HUMAN | 36 kDa           | 2                         | 6.10%               |
| 959 | Puromycin-sensitive aminopeptidase OS=Homo sapiens GN=NPEPPS PE=1 SV=2                       | PSA_HUMAN   | 103 kDa          | 15                        | 19%                 |
| 960 | Proteasome subunit alpha type-1 OS=Homo sapiens GN=PSMA1 PE=1 SV=1                           | PSA1_HUMAN  | 30 kDa           | 12                        | 46%                 |
| 961 | Proteasome subunit alpha type-2 OS=Homo sapiens GN=PSMA2 PE=1 SV=2                           | PSA2_HUMAN  | 26 kDa           | 9                         | 50%                 |
| 962 | Proteasome subunit alpha type-3 OS=Homo sapiens GN=PSMA3 PE=1 SV=2                           | PSA3_HUMAN  | 28 kDa           | 11                        | 35%                 |
| 963 | Proteasome subunit alpha type-4 OS=Homo sapiens GN=PSMA4 PE=1 SV=1                           | PSA4_HUMAN  | 29 kDa           | 10                        | 49%                 |
| 964 | Proteasome subunit alpha type-5 OS=Homo sapiens GN=PSMA5 PE=1 SV=3                           | PSA5_HUMAN  | 26 kDa           | 8                         | 42%                 |
| 965 | Proteasome subunit alpha type-6 OS=Homo sapiens GN=PSMA6 PE=1 SV=1                           | PSA6_HUMAN  | 27 kDa           | 8                         | 36%                 |
| 966 | Proteasome subunit alpha type-7 OS=Homo sapiens GN=PSMA7 PE=1 SV=1                           | PSA7_HUMAN  | 28 kDa           | 12                        | 56%                 |
| 967 | Proteasome subunit beta type-1 OS=Homo sapiens GN=PSMB1 PE=1 SV=2                            | PSB1_HUMAN  | 26 kDa           | 10                        | 51%                 |
| 968 | Proteasome subunit beta type-2 OS=Homo sapiens GN=PSMB2 PE=1 SV=1                            | PSB2_HUMAN  | 23 kDa           | 7                         | 39%                 |
| 969 | Proteasome subunit beta type-3 OS=Homo sapiens GN=PSMB3 PE=1 SV=2                            | PSB3_HUMAN  | 23 kDa           | 9                         | 47%                 |
| 970 | Proteasome subunit beta type-4 OS=Homo sapiens GN=PSMB4 PE=1 SV=4                            | PSB4_HUMAN  | 29 kDa           | 7                         | 38%                 |
| 971 | Proteasome subunit beta type-5 OS=Homo sapiens GN=PSMB5 PE=1 SV=3                            | PSB5_HUMAN  | 28 kDa           | 2                         | 7.60%               |
| 972 | Proteasome subunit beta type-6 OS=Homo sapiens GN=PSMB6 PE=1 SV=4                            | PSB6_HUMAN  | 25 kDa           | 4                         | 17%                 |
| 973 | Proteasome subunit beta type-7 OS=Homo sapiens GN=PSMB7 PE=1 SV=1                            | PSB7_HUMAN  | 30 kDa           | 5                         | 19%                 |
| 974 | Proteasome subunit beta type-8 OS=Homo sapiens GN=PSMB8 PE=1 SV=3                            | PSB8_HUMAN  | 30 kDa           | 5                         | 21%                 |
| 975 | Proteasome subunit beta type-9 OS=Homo sapiens GN=PSMB9 PE=1 SV=2                            | PSB9_HUMAN  | 23 kDa           | 2                         | 8.70%               |
| 976 | 26S proteasome non-ATPase regulatory subunit 11 OS=Homo sapiens GN=PSMD11 PE=1 SV=3          | PSD11_HUMAN | 47 kDa           | 7                         | 18%                 |
| 977 | 26S proteasome non-ATPase regulatory subunit 12 OS=Homo sapiens GN=PSMD12 PE=1 SV=3          | PSD12_HUMAN | 53 kDa           | 5                         | 12%                 |
| 978 | 26S proteasome non-ATPase regulatory subunit 13 OS=Homo sapiens GN=PSMD13 PE=1 SV=2          | PSD13_HUMAN | 43 kDa           | 6                         | 17%                 |
| 979 | 26S proteasome non-ATPase regulatory subunit 7 OS=Homo sapiens GN=PSMD7 PE=1 SV=2            | PSD7_HUMAN  | 37 kDa           | 5                         | 16%                 |
| 980 | 26S proteasome non-ATPase regulatory subunit 14 OS=Homo sapiens GN=PSMD14 PE=1 SV=1          | PSDE_HUMAN  | 35 kDa           | 2                         | 4.50%               |
| 981 | 26S proteasome non-ATPase regulatory subunit 1 OS=Homo sapiens GN=PSMD1 PE=1 SV=2            | PSMD1_HUMAN | 106 kDa          | 14                        | 20%                 |
| 982 | 26S proteasome non-ATPase regulatory subunit 2 OS=Homo sapiens GN=PSMD2 PE=1 SV=3            | PSMD2_HUMAN | 100 kDa          | 8                         | 12%                 |
| 983 | 26S proteasome non-ATPase regulatory subunit 3 OS=Homo sapiens GN=PSMD3 PE=1 SV=2            | PSMD3_HUMAN | 61 kDa           | 5                         | 10%                 |
| 984 | 26S proteasome non-ATPase regulatory subunit 4 OS=Homo sapiens GN=PSMD4 PE=1 SV=1            | PSMD4_HUMAN | 41 kDa           | 3                         | 9.50%               |
| 985 | 26S proteasome non-ATPase regulatory subunit 5 OS=Homo sapiens GN=PSMD5 PE=1 SV=3            | PSMD5_HUMAN | 56 kDa           | 5                         | 13%                 |
| 986 | 26S proteasome non-ATPase regulatory subunit 6 OS=Homo sapiens GN=PSMD6 PE=1 SV=1            | PSMD6_HUMAN | 46 kDa           | 4                         | 12%                 |
| 987 | 26S proteasome non-ATPase regulatory subunit 8 OS=Homo sapiens GN=PSMD8 PE=1 SV=2            | PSMD8_HUMAN | 40 kDa           | 5                         | 16%                 |

| #    | Proteins                                                                                | Uniprot ID  | Molecular Weight | Number of unique peptides | Percent of coverage |
|------|-----------------------------------------------------------------------------------------|-------------|------------------|---------------------------|---------------------|
| 988  | Proteasome activator complex subunit 1 OS=Homo sapiens GN=PSME1 PE=1 SV=1               | PSME1_HUMAN | 29 kDa           | 16                        | 55%                 |
| 989  | Proteasome activator complex subunit 2 OS=Homo sapiens GN=PSME2 PE=1 SV=4               | PSME2_HUMAN | 27 kDa           | 10                        | 41%                 |
| 990  | Proteasome inhibitor PI31 subunit OS=Homo sapiens GN=PSMF1 PE=1 SV=2                    | PSMF1_HUMAN | 30 kDa           | 4                         | 18%                 |
| 991  | Proteasome assembly chaperone 1 OS=Homo sapiens GN=PSMG1 PE=1 SV=1                      | PSMG1_HUMAN | 33 kDa           | 2                         | 10%                 |
| 992  | Prostaglandin reductase 1 OS=Homo sapiens GN=PTGR1 PE=1 SV=2                            | PTGR1_HUMAN | 36 kDa           | 11                        | 37%                 |
| 993  | Parathyroid hormone-related protein OS=Homo sapiens GN=PTH1H PE=1 SV=1                  | PTH1H_HUMAN | 20 kDa           | 6                         | 37%                 |
| 994  | Prothymosin alpha OS=Homo sapiens GN=PTMA PE=1 SV=2                                     | PTMA_HUMAN  | 12 kDa           | 2                         | 22%                 |
| 995  | Serine/threonine-protein phosphatase 2A activator OS=Homo sapiens GN=PPP2R4 PE=1 SV=3   | PTPA_HUMAN  | 41 kDa           | 4                         | 11%                 |
| 996  | Receptor-type tyrosine-protein phosphatase F OS=Homo sapiens GN=PTPRF PE=1 SV=2         | PTPRF_HUMAN | 213 kDa          | 12                        | 9.00%               |
| 997  | Receptor-type tyrosine-protein phosphatase eta OS=Homo sapiens GN=PTPRJ PE=1 SV=3       | PTPRJ_HUMAN | 146 kDa          | 3                         | 2.50%               |
| 998  | Receptor-type tyrosine-protein phosphatase kappa OS=Homo sapiens GN=PTPRK PE=1 SV=2     | PTPRK_HUMAN | 162 kDa          | 5                         | 4.10%               |
| 999  | Putative peptidyl-tRNA hydrolase PTRHD1 OS=Homo sapiens GN=PTRHD1 PE=1 SV=1             | PTRD1_HUMAN | 16 kDa           | 5                         | 49%                 |
| 1000 | Trifunctional purine biosynthetic protein adenosine-3 OS=Homo sapiens GN=GART PE=1 SV=1 | PUR2_HUMAN  | 108 kDa          | 10                        | 16%                 |
| 1001 | Multifunctional protein ADE2 OS=Homo sapiens GN=PAICS PE=1 SV=3                         | PUR6_HUMAN  | 47 kDa           | 7                         | 16%                 |
| 1002 | Bifunctional purine biosynthesis protein PURH OS=Homo sapiens GN=ATIC PE=1 SV=3         | PUR9_HUMAN  | 65 kDa           | 6                         | 12%                 |
| 1003 | Transcriptional activator protein Pur-alpha OS=Homo sapiens GN=PURA PE=1 SV=2           | PURA_HUMAN  | 35 kDa           | 3                         | 13%                 |
| 1004 | Adenylosuccinate synthetase isozyme 2 OS=Homo sapiens GN=ADSS PE=1 SV=3                 | PURA2_HUMAN | 50 kDa           | 3                         | 8.30%               |
| 1005 | Peroxidasin homolog OS=Homo sapiens GN=PXDN PE=1 SV=2                                   | PXDN_HUMAN  | 165 kDa          | 4                         | 4.30%               |
| 1006 | Glycogen phosphorylase, brain form OS=Homo sapiens GN=PYGB PE=1 SV=5                    | PYGB_HUMAN  | 97 kDa           | 31                        | 41%                 |
| 1007 | Glycogen phosphorylase, liver form OS=Homo sapiens GN=PYGL PE=1 SV=4                    | PYGL_HUMAN  | 97 kDa           | 20                        | 32%                 |
| 1008 | Pregnancy zone protein OS=Homo sapiens GN=PZP PE=1 SV=4                                 | PZP_HUMAN   | 164 kDa          | 14                        | 17%                 |
| 1009 | Quinone oxidoreductase OS=Homo sapiens GN=CRYZ PE=1 SV=1                                | QOR_HUMAN   | 35 kDa           | 4                         | 16%                 |
| 1010 | Quinone oxidoreductase PIG3 OS=Homo sapiens GN=TP53I3 PE=1 SV=2                         | QORX_HUMAN  | 36 kDa           | 3                         | 12%                 |
| 1011 | Glutaminyl-peptide cyclotransferase OS=Homo sapiens GN=QPCT PE=1 SV=1                   | QPCT_HUMAN  | 41 kDa           | 2                         | 8.00%               |
| 1012 | Sulfhydryl oxidase 1 OS=Homo sapiens GN=QSOX1 PE=1 SV=3                                 | QSOX1_HUMAN | 83 kDa           | 43                        | 56%                 |
| 1013 | Ras-related protein Rab-10 OS=Homo sapiens GN=RAB10 PE=1 SV=1                           | RAB10_HUMAN | 23 kDa           | 5                         | 34%                 |
| 1014 | Ras-related protein Rab-14 OS=Homo sapiens GN=RAB14 PE=1 SV=4                           | RAB14_HUMAN | 24 kDa           | 7                         | 53%                 |
| 1015 | Ras-related protein Rab-18 OS=Homo sapiens GN=RAB18 PE=1 SV=1                           | RAB18_HUMAN | 23 kDa           | 10                        | 59%                 |
| 1016 | Ras-related protein Rab-1A OS=Homo sapiens GN=RAB1A PE=1 SV=3                           | RAB1A_HUMAN | 23 kDa           | 16                        | 75%                 |
| 1017 | Ras-related protein Rab-1B OS=Homo sapiens GN=RAB1B PE=1 SV=1                           | RAB1B_HUMAN | 22 kDa           | 6                         | 66%                 |
| 1018 | Ras-related protein Rab-21 OS=Homo sapiens GN=RAB21 PE=1 SV=3                           | RAB21_HUMAN | 24 kDa           | 8                         | 35%                 |
| 1019 | Ras-related protein Rab-25 OS=Homo sapiens GN=RAB25 PE=1 SV=2                           | RAB25_HUMAN | 23 kDa           | 4                         | 23%                 |
| 1020 | Ras-related protein Rab-2A OS=Homo sapiens GN=RAB2A PE=1 SV=1                           | RAB2A_HUMAN | 24 kDa           | 8                         | 45%                 |
| 1021 | Ras-related protein Rab-35 OS=Homo sapiens GN=RAB35 PE=1 SV=1                           | RAB35_HUMAN | 23 kDa           | 2                         | 26%                 |
| 1022 | Ras-related protein Rab-3D OS=Homo sapiens GN=RAB3D PE=1 SV=1                           | RAB3D_HUMAN | 24 kDa           | 4                         | 28%                 |
| 1023 | Ras-related protein Rab-5A OS=Homo sapiens GN=RAB5A PE=1 SV=2                           | RAB5A_HUMAN | 24 kDa           | 4                         | 42%                 |
| 1024 | Ras-related protein Rab-5B OS=Homo sapiens GN=RAB5B PE=1 SV=1                           | RAB5B_HUMAN | 24 kDa           | 9                         | 54%                 |
| 1025 | Ras-related protein Rab-5C OS=Homo sapiens GN=RAB5C PE=1 SV=2                           | RAB5C_HUMAN | 23 kDa           | 5                         | 48%                 |
| 1026 | Ras-related protein Rab-6A OS=Homo sapiens GN=RAB6A PE=1 SV=3                           | RAB6A_HUMAN | 24 kDa           | 4                         | 25%                 |
| 1027 | Ras-related protein Rab-7a OS=Homo sapiens GN=RAB7A PE=1 SV=1                           | RAB7A_HUMAN | 23 kDa           | 12                        | 61%                 |

| #    | Proteins                                                                                     | Uniprot ID      | Molecular Weight | Number of unique peptides | Percent of coverage |
|------|----------------------------------------------------------------------------------------------|-----------------|------------------|---------------------------|---------------------|
| 1028 | Ras-related protein Rab-8A OS=Homo sapiens GN=RAB8A PE=1 SV=1                                | RAB8A_HUMAN     | 24 kDa           | 5                         | 36%                 |
| 1029 | Cellular retinoic acid-binding protein 1 OS=Homo sapiens GN=CRABP1 PE=1 SV=2                 | RABP1_HUMAN     | 16 kDa           | 5                         | 46%                 |
| 1030 | Cellular retinoic acid-binding protein 2 OS=Homo sapiens GN=CRABP2 PE=1 SV=2                 | RABP2_HUMAN     | 16 kDa           | 7                         | 47%                 |
| 1031 | Ras-related C3 botulinum toxin substrate 1 OS=Homo sapiens GN=RAC1 PE=1 SV=1                 | RAC1_HUMAN      | 21 kDa           | 7                         | 31%                 |
| 1032 | DNA repair protein RAD50 OS=Homo sapiens GN=RAD50 PE=1 SV=1                                  | RAD50_HUMAN     | 154 kDa          | 2                         | 1.50%               |
| 1033 | Radixin OS=Homo sapiens GN=RDX PE=1 SV=1                                                     | RADI_HUMAN      | 69 kDa           | 16                        | 37%                 |
| 1034 | Ras-related protein Ral-B OS=Homo sapiens GN=RALB PE=1 SV=1                                  | RALB_HUMAN      | 23 kDa           | 5                         | 28%                 |
| 1035 | GTP-binding nuclear protein Ran OS=Homo sapiens GN=RAN PE=1 SV=3                             | RAN_HUMAN       | 24 kDa           | 4                         | 21%                 |
| 1036 | Ran-specific GTPase-activating protein OS=Homo sapiens GN=RANBP1 PE=1 SV=1                   | RANG_HUMAN      | 23 kDa           | 2                         | 16%                 |
| 1037 | Ras-related protein Rap-1b OS=Homo sapiens GN=RAP1B PE=1 SV=1                                | RAP1B_HUMAN     | 21 kDa           | 9                         | 51%                 |
| 1038 | Ras-related protein Rap-2c OS=Homo sapiens GN=RAP2C PE=1 SV=1                                | RAP2C_HUMAN     | 21 kDa           | 2                         | 11%                 |
| 1039 | GTPase KRas OS=Homo sapiens GN=KRAS PE=1 SV=1                                                | RASK_HUMAN      | 22 kDa           | 2                         | 12%                 |
| 1040 | Ras-related protein Rab-11B OS=Homo sapiens GN=RAB11B PE=1 SV=4                              | RB11B_HUMAN     | 24 kDa           | 10                        | 46%                 |
| 1041 | Reticulocalbin-1 OS=Homo sapiens GN=RCN1 PE=1 SV=1                                           | RCN1_HUMAN      | 39 kDa           | 3                         | 12%                 |
| 1042 | UV excision repair protein RAD23 homolog A OS=Homo sapiens GN=RAD23A PE=1 SV=1               | RD23A_HUMAN     | 40 kDa           | 3                         | 18%                 |
| 1043 | UV excision repair protein RAD23 homolog B OS=Homo sapiens GN=RAD23B PE=1 SV=1               | RD23B_HUMAN     | 43 kDa           | 11                        | 33%                 |
| 1044 | Reversion-inducing cysteine-rich protein with Kazal motifs OS=Homo sapiens GN=RECK PE=1 SV=1 | RECK_HUMAN      | 106 kDa          | 3                         | 3.40%               |
| 1045 | Receptor expression-enhancing protein 5 OS=Homo sapiens GN=REEP5 PE=1 SV=3                   | REEP5_HUMAN     | 21 kDa           | 3                         | 10%                 |
| 1046 | Regulator of nonsense transcripts 1 OS=Homo sapiens GN=UPF1 PE=1 SV=2                        | RENT1_HUMAN     | 124 kDa          | 3                         | 2.60%               |
| 1047 | Retinol-binding protein 1 OS=Homo sapiens GN=RBP1 PE=1 SV=2                                  | RET1_HUMAN      | 16 kDa           | 6                         | 58%                 |
| 1048 | Retinol-binding protein 4 OS=Homo sapiens GN=RBP4 PE=1 SV=3                                  | RET4_HUMAN      | 23 kDa           | 3                         | 15%                 |
| 1049 | GTP-binding protein Rheb OS=Homo sapiens GN=RHEB PE=1 SV=1                                   | RHEB_HUMAN      | 20 kDa           | 2                         | 11%                 |
| 1050 | Rho GTPase-activating protein 1 OS=Homo sapiens GN=ARHGAP1 PE=1 SV=1                         | RHG01_HUMAN     | 50 kDa           | 2                         | 7.50%               |
| 1051 | Rho GTPase-activating protein 18 OS=Homo sapiens GN=ARHGAP18 PE=1 SV=3                       | RHG18_HUMAN     | 75 kDa           | 21                        | 37%                 |
| 1052 | Transforming protein RhoA OS=Homo sapiens GN=RHOA PE=1 SV=1                                  | RHOA_HUMAN      | 22 kDa           | 9                         | 50%                 |
| 1053 | Ribonuclease inhibitor OS=Homo sapiens GN=RNH1 PE=1 SV=2                                     | RINI_HUMAN      | 50 kDa           | 16                        | 50%                 |
| 1054 | Retinoid-inducible serine carboxypeptidase OS=Homo sapiens GN=SCPEP1 PE=1 SV=1               | RISC_HUMAN      | 51 kDa           | 16                        | 40%                 |
| 1055 | 60S ribosomal protein L10a OS=Homo sapiens GN=RPL10A PE=1 SV=2                               | RL10A_HUMAN     | 25 kDa           | 4                         | 23%                 |
| 1056 | 60S ribosomal protein L23 OS=Homo sapiens GN=RPL23 PE=1 SV=1                                 | RL23_HUMAN      | 15 kDa           | 2                         | 20%                 |
| 1057 | 60S ribosomal protein L3 OS=Homo sapiens GN=RPL3 PE=1 SV=2                                   | RL3_HUMAN       | 46 kDa           | 2                         | 3.70%               |
| 1058 | 60S ribosomal protein L34 OS=Homo sapiens GN=RPL34 PE=1 SV=3                                 | RL34_HUMAN      | 13 kDa           | 2                         | 13%                 |
| 1059 | 60S ribosomal protein L4 OS=Homo sapiens GN=RPL4 PE=1 SV=5                                   | RL4_HUMAN       | 48 kDa           | 4                         | 11%                 |
| 1060 | Ubiquitin-60S ribosomal protein L40 OS=Homo sapiens GN=UBA52 PE=1 SV=2                       | RL40_HUMAN (+3) | 15 kDa           | 5                         | 38%                 |
| 1061 | 60S ribosomal protein L6 OS=Homo sapiens GN=RPL6 PE=1 SV=3                                   | RL6_HUMAN       | 33 kDa           | 3                         | 14%                 |
| 1062 | 60S acidic ribosomal protein P0 OS=Homo sapiens GN=RPLP0 PE=1 SV=1                           | RLA0_HUMAN      | 34 kDa           | 5                         | 24%                 |
| 1063 | 60S acidic ribosomal protein P2 OS=Homo sapiens GN=RPLP2 PE=1 SV=1                           | RLA2_HUMAN      | 12 kDa           | 3                         | 38%                 |
| 1064 | Ribonuclease 4 OS=Homo sapiens GN=RNASE4 PE=1 SV=3                                           | RNAS4_HUMAN     | 17 kDa           | 6                         | 44%                 |
| 1065 | Ribonuclease T2 OS=Homo sapiens GN=RNASET2 PE=1 SV=2                                         | RNT2_HUMAN      | 29 kDa           | 7                         | 29%                 |
| 1066 | Tyrosine-protein kinase transmembrane receptor ROR2 OS=Homo sapiens GN=ROR2 PE=1 SV=2        | ROR2_HUMAN      | 105 kDa          | 2                         | 2.00%               |
| 1067 | Ras-related protein R-Ras OS=Homo sapiens GN=RRAS PE=1 SV=1                                  | RRAS_HUMAN      | 23 kDa           | 4                         | 21%                 |

| #    | Proteins                                                                                        | Uniprot ID  | Molecular Weight | Number of unique peptides | Percent of coverage |
|------|-------------------------------------------------------------------------------------------------|-------------|------------------|---------------------------|---------------------|
| 1068 | Ras-related protein R-Ras2 OS=Homo sapiens GN=RRAS2 PE=1 SV=1                                   | RRAS2_HUMAN | 23 kDa           | 2                         | 17%                 |
| 1069 | Ribosome-binding protein 1 OS=Homo sapiens GN=RRBP1 PE=1 SV=4                                   | RRBP1_HUMAN | 152 kDa          | 32                        | 22%                 |
| 1070 | 40S ribosomal protein S12 OS=Homo sapiens GN=RPS12 PE=1 SV=3                                    | RS12_HUMAN  | 15 kDa           | 4                         | 39%                 |
| 1071 | 40S ribosomal protein S13 OS=Homo sapiens GN=RPS13 PE=1 SV=2                                    | RS13_HUMAN  | 17 kDa           | 2                         | 16%                 |
| 1072 | 40S ribosomal protein S16 OS=Homo sapiens GN=RPS16 PE=1 SV=2                                    | RS16_HUMAN  | 16 kDa           | 2                         | 12%                 |
| 1073 | 40S ribosomal protein S18 OS=Homo sapiens GN=RPS18 PE=1 SV=3                                    | RS18_HUMAN  | 18 kDa           | 3                         | 19%                 |
| 1074 | 40S ribosomal protein S2 OS=Homo sapiens GN=RPS2 PE=1 SV=2                                      | RS2_HUMAN   | 31 kDa           | 4                         | 12%                 |
| 1075 | 40S ribosomal protein S28 OS=Homo sapiens GN=RPS28 PE=1 SV=1                                    | RS28_HUMAN  | 8 kDa            | 2                         | 33%                 |
| 1076 | 40S ribosomal protein S3 OS=Homo sapiens GN=RPS3 PE=1 SV=2                                      | RS3_HUMAN   | 27 kDa           | 2                         | 7.00%               |
| 1077 | 40S ribosomal protein S3a OS=Homo sapiens GN=RPS3A PE=1 SV=2                                    | RS3A_HUMAN  | 30 kDa           | 2                         | 8.30%               |
| 1078 | 40S ribosomal protein S5 OS=Homo sapiens GN=RPS5 PE=1 SV=4                                      | RS5_HUMAN   | 23 kDa           | 2                         | 14%                 |
| 1079 | 40S ribosomal protein S7 OS=Homo sapiens GN=RPS7 PE=1 SV=1                                      | RS7_HUMAN   | 22 kDa           | 2                         | 10%                 |
| 1080 | 40S ribosomal protein SA OS=Homo sapiens GN=RPSA PE=1 SV=4                                      | RSSA_HUMAN  | 33 kDa           | 3                         | 9.20%               |
| 1081 | Protein S100-B OS=Homo sapiens GN=S100B PE=1 SV=2                                               | S100B_HUMAN | 11 kDa           | 2                         | 33%                 |
| 1082 | Protein S100-A1 OS=Homo sapiens GN=S100A1 PE=1 SV=2                                             | S10A1_HUMAN | 11 kDa           | 4                         | 49%                 |
| 1083 | Protein S100-A6 OS=Homo sapiens GN=S100A6 PE=1 SV=1                                             | S10A6_HUMAN | 10 kDa           | 2                         | 17%                 |
| 1084 | Protein S100-A8 OS=Homo sapiens GN=S100A8 PE=1 SV=1                                             | S10A8_HUMAN | 11 kDa           | 2                         | 25%                 |
| 1085 | Protein S100-A9 OS=Homo sapiens GN=S100A9 PE=1 SV=1                                             | S10A9_HUMAN | 13 kDa           | 3                         | 32%                 |
| 1086 | Protein S100-A11 OS=Homo sapiens GN=S100A11 PE=1 SV=2                                           | S10AB_HUMAN | 12 kDa           | 7                         | 58%                 |
| 1087 | Protein S100-A13 OS=Homo sapiens GN=S100A13 PE=1 SV=1                                           | S10AD_HUMAN | 11 kDa           | 6                         | 49%                 |
| 1088 | Protein S100-A14 OS=Homo sapiens GN=S100A14 PE=1 SV=1                                           | S10AE_HUMAN | 12 kDa           | 3                         | 34%                 |
| 1089 | Protein S100-A16 OS=Homo sapiens GN=S100A16 PE=1 SV=1                                           | S10AG_HUMAN | 12 kDa           | 4                         | 42%                 |
| 1090 | Putative sodium-coupled neutral amino acid transporter 10 OS=Homo sapiens GN=SLC38A10 PE=1 SV=2 | S38AA_HUMAN | 120 kDa          | 11                        | 14%                 |
| 1091 | Serum amyloid A protein OS=Homo sapiens GN=SAA1 PE=1 SV=2                                       | SAA_HUMAN   | 14 kDa           | 3                         | 41%                 |
| 1092 | Serum amyloid A-4 protein OS=Homo sapiens GN=SAA4 PE=1 SV=2                                     | SAA4_HUMAN  | 15 kDa           | 3                         | 22%                 |
| 1093 | Adenosylhomocysteinase OS=Homo sapiens GN=AHCY PE=1 SV=4                                        | SAHH_HUMAN  | 48 kDa           | 13                        | 35%                 |
| 1094 | Putative adenosylhomocysteinase 2 OS=Homo sapiens GN=AHCYL1 PE=1 SV=2                           | SAHH2_HUMAN | 59 kDa           | 3                         | 7.40%               |
| 1095 | Serum amyloid P-component OS=Homo sapiens GN=APCS PE=1 SV=2                                     | SAMP_HUMAN  | 25 kDa           | 2                         | 11%                 |
| 1096 | Proactivator polypeptide OS=Homo sapiens GN=PSAP PE=1 SV=2                                      | SAP_HUMAN   | 58 kDa           | 26                        | 56%                 |
| 1097 | Ganglioside GM2 activator OS=Homo sapiens GN=GM2A PE=1 SV=4                                     | SAP3_HUMAN  | 21 kDa           | 5                         | 29%                 |
| 1098 | GTP-binding protein SAR1a OS=Homo sapiens GN=SAR1A PE=1 SV=1                                    | SAR1A_HUMAN | 22 kDa           | 7                         | 47%                 |
| 1099 | GTP-binding protein SAR1b OS=Homo sapiens GN=SAR1B PE=1 SV=1                                    | SAR1B_HUMAN | 22 kDa           | 2                         | 29%                 |
| 1100 | S-acyl fatty acid synthase thioesterase, medium chain OS=Homo sapiens GN=OLAH PE=2 SV=1         | SAST_HUMAN  | 30 kDa           | 12                        | 55%                 |
| 1101 | Ribosome maturation protein SBDS OS=Homo sapiens GN=SBDS PE=1 SV=4                              | SBDS_HUMAN  | 29 kDa           | 3                         | 10.00%              |
| 1102 | Selenium-binding protein 1 OS=Homo sapiens GN=SELENBP1 PE=1 SV=2                                | SBP1_HUMAN  | 52 kDa           | 26                        | 62%                 |
| 1103 | Vesicle-trafficking protein SEC22b OS=Homo sapiens GN=SEC22B PE=1 SV=4                          | SC22B_HUMAN | 25 kDa           | 3                         | 13%                 |
| 1104 | Protein transport protein Sec23B OS=Homo sapiens GN=SEC23B PE=1 SV=2                            | SC23B_HUMAN | 86 kDa           | 3                         | 4.60%               |
| 1105 | Protein transport protein Sec31A OS=Homo sapiens GN=SEC31A PE=1 SV=3                            | SC31A_HUMAN | 133 kDa          | 3                         | 3.60%               |
| 1106 | Sec1 family domain-containing protein 1 OS=Homo sapiens GN=SCFD1 PE=1 SV=4                      | SCFD1_HUMAN | 72 kDa           | 3                         | 6.90%               |
| 1107 | Secernin-3 OS=Homo sapiens GN=SCRN3 PE=1 SV=1                                                   | SCRN3_HUMAN | 49 kDa           | 2                         | 4.20%               |
| 1108 | Syndecan-2 OS=Homo sapiens GN=SDC2 PE=1 SV=2                                                    | SDC2_HUMAN  | 22 kDa           | 3                         | 15%                 |
| 1109 | Syndecan-4 OS=Homo sapiens GN=SDC4 PE=1 SV=2                                                    | SDC4_HUMAN  | 22 kDa           | 5                         | 33%                 |

| #    | Proteins                                                                                                 | Uniprot ID  | Molecular Weight | Number of unique peptides | Percent of coverage |
|------|----------------------------------------------------------------------------------------------------------|-------------|------------------|---------------------------|---------------------|
| 1110 | Syntenin-1 OS=Homo sapiens GN=SDCBP PE=1 SV=1                                                            | SDCB1_HUMAN | 32 kDa           | 8                         | 40%                 |
| 1111 | Protein SEC13 homolog OS=Homo sapiens GN=SEC13 PE=1 SV=3                                                 | SEC13_HUMAN | 36 kDa           | 2                         | 7.50%               |
| 1112 | Selenoprotein M OS=Homo sapiens GN=SELM PE=1 SV=3                                                        | SELM_HUMAN  | 16 kDa           | 3                         | 30%                 |
| 1113 | Semaphorin-4B OS=Homo sapiens GN=SEMA4B PE=1 SV=3                                                        | SEM4B_HUMAN | 92 kDa           | 4                         | 4.20%               |
| 1114 | Selenoprotein P OS=Homo sapiens GN=SEPP1 PE=1 SV=3                                                       | SEPP1_HUMAN | 43 kDa           | 6                         | 16%                 |
| 1115 | Septin-2 OS=Homo sapiens GN=SEPT2 PE=1 SV=1                                                              | SEPT2_HUMAN | 41 kDa           | 2                         | 5.80%               |
| 1116 | Septin-9 OS=Homo sapiens GN=SEPT9 PE=1 SV=2                                                              | SEPT9_HUMAN | 65 kDa           | 2                         | 3.20%               |
| 1117 | D-3-phosphoglycerate dehydrogenase OS=Homo sapiens GN=PHGDH PE=1 SV=4                                    | SERA_HUMAN  | 57 kDa           | 14                        | 30%                 |
| 1118 | Secreted frizzled-related protein 1 OS=Homo sapiens GN=SFRP1 PE=1 SV=1                                   | SFRP1_HUMAN | 35 kDa           | 2                         | 7.00%               |
| 1119 | Small glutamine-rich tetratricopeptide repeat-containing protein alpha OS=Homo sapiens GN=SGTA PE=1 SV=1 | SGTA_HUMAN  | 34 kDa           | 2                         | 7.70%               |
| 1120 | SH3 domain-binding protein 4 OS=Homo sapiens GN=SH3BP4 PE=1 SV=1                                         | SH3B4_HUMAN | 107 kDa          | 3                         | 3.70%               |
| 1121 | SH3 domain-binding glutamic acid-rich-like protein OS=Homo sapiens GN=SH3BGL PE=1 SV=1                   | SH3L1_HUMAN | 13 kDa           | 2                         | 19%                 |
| 1122 | SH3 domain-binding glutamic acid-rich-like protein 3 OS=Homo sapiens GN=SH3BGL3 PE=1 SV=1                | SH3L3_HUMAN | 10 kDa           | 3                         | 40%                 |
| 1123 | Sex hormone-binding globulin OS=Homo sapiens GN=SHBG PE=1 SV=2                                           | SHBG_HUMAN  | 44 kDa           | 5                         | 16%                 |
| 1124 | Shootin-1 OS=Homo sapiens GN=KIAA1598 PE=1 SV=4                                                          | SHOT1_HUMAN | 72 kDa           | 10                        | 13%                 |
| 1125 | Tyrosine-protein phosphatase non-receptor type substrate 1 OS=Homo sapiens GN=SIRPA PE=1 SV=2            | SHPS1_HUMAN | 55 kDa           | 9                         | 21%                 |
| 1126 | Sialate O-acetyltransferase OS=Homo sapiens GN=SIAE PE=1 SV=1                                            | SIAE_HUMAN  | 58 kDa           | 9                         | 18%                 |
| 1127 | Sialic acid synthase OS=Homo sapiens GN=NANS PE=1 SV=2                                                   | SIAS_HUMAN  | 40 kDa           | 12                        | 36%                 |
| 1128 | Nucleotide exchange factor SIL1 OS=Homo sapiens GN=SIL1 PE=1 SV=1                                        | SIL1_HUMAN  | 52 kDa           | 16                        | 38%                 |
| 1129 | S-phase kinase-associated protein 1 OS=Homo sapiens GN=SKP1 PE=1 SV=2                                    | SKP1_HUMAN  | 19 kDa           | 4                         | 25%                 |
| 1130 | STE20-like serine/threonine-protein kinase OS=Homo sapiens GN=SLK PE=1 SV=1                              | SLK_HUMAN   | 143 kDa          | 3                         | 2.30%               |
| 1131 | Alpha-soluble NSF attachment protein OS=Homo sapiens GN=NAPA PE=1 SV=3                                   | SNAA_HUMAN  | 33 kDa           | 3                         | 14%                 |
| 1132 | Gamma-soluble NSF attachment protein OS=Homo sapiens GN=NAPG PE=1 SV=1                                   | SNAG_HUMAN  | 35 kDa           | 2                         | 7.40%               |
| 1133 | Staphylococcal nuclease domain-containing protein 1 OS=Homo sapiens GN=SND1 PE=1 SV=1                    | SND1_HUMAN  | 102 kDa          | 7                         | 9.20%               |
| 1134 | Synaptosomal-associated protein 23 OS=Homo sapiens GN=SNAP23 PE=1 SV=1                                   | SNP23_HUMAN | 23 kDa           | 12                        | 69%                 |
| 1135 | Synaptosomal-associated protein 29 OS=Homo sapiens GN=SNAP29 PE=1 SV=1                                   | SNP29_HUMAN | 29 kDa           | 3                         | 13%                 |
| 1136 | Sorting nexin-12 OS=Homo sapiens GN=SNX12 PE=1 SV=3                                                      | SNX12_HUMAN | 20 kDa           | 3                         | 30%                 |
| 1137 | Sorting nexin-9 OS=Homo sapiens GN=SNX9 PE=1 SV=1                                                        | SNX9_HUMAN  | 67 kDa           | 2                         | 4.40%               |
| 1138 | Superoxide dismutase [Cu-Zn] OS=Homo sapiens GN=SOD1 PE=1 SV=2                                           | SODC_HUMAN  | 16 kDa           | 7                         | 53%                 |
| 1139 | Extracellular superoxide dismutase [Cu-Zn] OS=Homo sapiens GN=SOD3 PE=1 SV=2                             | SODE_HUMAN  | 26 kDa           | 6                         | 30%                 |
| 1140 | Sortilin OS=Homo sapiens GN=SORT1 PE=1 SV=3                                                              | SORT_HUMAN  | 92 kDa           | 6                         | 7.80%               |
| 1141 | Sclerostin domain-containing protein 1 OS=Homo sapiens GN=SOSTDC1 PE=1 SV=2                              | SOSD1_HUMAN | 23 kDa           | 5                         | 33%                 |
| 1142 | Serpin B6 OS=Homo sapiens GN=SERPINB6 PE=1 SV=3                                                          | SPB6_HUMAN  | 43 kDa           | 5                         | 16%                 |
| 1143 | Spermidine synthase OS=Homo sapiens GN=SRM PE=1 SV=1                                                     | SPEE_HUMAN  | 34 kDa           | 2                         | 4.60%               |
| 1144 | Kunitz-type protease inhibitor 1 OS=Homo sapiens GN=SPINT1 PE=1 SV=2                                     | SPIT1_HUMAN | 58 kDa           | 17                        | 32%                 |
| 1145 | Kunitz-type protease inhibitor 2 OS=Homo sapiens GN=SPINT2 PE=1 SV=2                                     | SPIT2_HUMAN | 28 kDa           | 3                         | 15%                 |
| 1146 | Sepiapterin reductase OS=Homo sapiens GN=SPR PE=1 SV=1                                                   | SPRE_HUMAN  | 28 kDa           | 3                         | 19%                 |
| 1147 | SPARC-like protein 1 OS=Homo sapiens GN=SPARCL1 PE=1 SV=2                                                | SPRL1_HUMAN | 75 kDa           | 2                         | 3.60%               |
| 1148 | Spermine synthase OS=Homo sapiens GN=SMS PE=1 SV=2                                                       | SPSY_HUMAN  | 41 kDa           | 7                         | 20%                 |
| 1149 | Spectrin alpha chain, brain OS=Homo sapiens GN=SPTAN1 PE=1 SV=3                                          | SPTA2_HUMAN | 285 kDa          | 4                         | 2.40%               |

| #    | Proteins                                                                                  | Uniprot ID  | Molecular Weight | Number of unique peptides | Percent of coverage |
|------|-------------------------------------------------------------------------------------------|-------------|------------------|---------------------------|---------------------|
| 1150 | Src substrate cortactin OS=Homo sapiens GN=CTTN PE=1 SV=2                                 | SRC8_HUMAN  | 62 kDa           | 9                         | 16%                 |
| 1151 | Signal recognition particle 9 kDa protein OS=Homo sapiens GN=SRP9 PE=1 SV=2               | SRP09_HUMAN | 10 kDa           | 2                         | 22%                 |
| 1152 | Signal recognition particle 14 kDa protein OS=Homo sapiens GN=SRP14 PE=1 SV=2             | SRP14_HUMAN | 15 kDa           | 2                         | 20%                 |
| 1153 | Suppressor of tumorigenicity 14 protein OS=Homo sapiens GN=ST14 PE=1 SV=2                 | ST14_HUMAN  | 95 kDa           | 9                         | 14%                 |
| 1154 | Signal transducer and activator of transcription 5A OS=Homo sapiens GN=STAT5A PE=1 SV=1   | STA5A_HUMAN | 91 kDa           | 11                        | 15%                 |
| 1155 | Signal transducer and activator of transcription 3 OS=Homo sapiens GN=STAT3 PE=1 SV=2     | STAT3_HUMAN | 88 kDa           | 3                         | 6.40%               |
| 1156 | Double-stranded RNA-binding protein Staufien homolog 1 OS=Homo sapiens GN=STAU1 PE=1 SV=2 | STAU1_HUMAN | 63 kDa           | 4                         | 8.10%               |
| 1157 | Stanniocalcin-1 OS=Homo sapiens GN=STC1 PE=1 SV=1                                         | STC1_HUMAN  | 28 kDa           | 3                         | 11%                 |
| 1158 | Stress-induced-phosphoprotein 1 OS=Homo sapiens GN=STIP1 PE=1 SV=1                        | STIP1_HUMAN | 63 kDa           | 21                        | 40%                 |
| 1159 | Serine/threonine-protein kinase 24 OS=Homo sapiens GN=STK24 PE=1 SV=1                     | STK24_HUMAN | 49 kDa           | 3                         | 8.80%               |
| 1160 | Serine/threonine-protein kinase 3 OS=Homo sapiens GN=STK3 PE=1 SV=2                       | STK3_HUMAN  | 56 kDa           | 8                         | 18%                 |
| 1161 | Erythrocyte band 7 integral membrane protein OS=Homo sapiens GN=STOM PE=1 SV=3            | STOM_HUMAN  | 32 kDa           | 9                         | 45%                 |
| 1162 | Serine-threonine kinase receptor-associated protein OS=Homo sapiens GN=STRAP PE=1 SV=1    | STRAP_HUMAN | 38 kDa           | 3                         | 9.40%               |
| 1163 | Syntaxin-12 OS=Homo sapiens GN=STX12 PE=1 SV=1                                            | STX12_HUMAN | 32 kDa           | 2                         | 8.70%               |
| 1164 | Syntaxin-3 OS=Homo sapiens GN=STX3 PE=1 SV=3                                              | STX3_HUMAN  | 33 kDa           | 7                         | 21%                 |
| 1165 | Syntaxin-binding protein 1 OS=Homo sapiens GN=STXBP1 PE=1 SV=1                            | STXB1_HUMAN | 68 kDa           | 9                         | 18%                 |
| 1166 | Syntaxin-binding protein 2 OS=Homo sapiens GN=STXBP2 PE=1 SV=2                            | STXB2_HUMAN | 66 kDa           | 26                        | 51%                 |
| 1167 | Suppressor of G2 allele of SKP1 homolog OS=Homo sapiens GN=SUGT1 PE=1 SV=3                | SUGT1_HUMAN | 41 kDa           | 3                         | 7.40%               |
| 1168 | Extracellular sulfatase Sulf-2 OS=Homo sapiens GN=SULF2 PE=1 SV=1                         | SULF2_HUMAN | 100 kDa          | 5                         | 5.90%               |
| 1169 | Sulfatase-modifying factor 2 OS=Homo sapiens GN=SUMF2 PE=1 SV=2                           | SUMF2_HUMAN | 34 kDa           | 4                         | 18%                 |
| 1170 | Small ubiquitin-related modifier 2 OS=Homo sapiens GN=SUMO2 PE=1 SV=2                     | SUMO2_HUMAN | 11 kDa           | 2                         | 23%                 |
| 1171 | Alanyl-tRNA synthetase, cytoplasmic OS=Homo sapiens GN=AARS PE=1 SV=2                     | SYAC_HUMAN  | 107 kDa          | 8                         | 10%                 |
| 1172 | Aspartyl-tRNA synthetase, cytoplasmic OS=Homo sapiens GN=DARS PE=1 SV=2                   | SYDC_HUMAN  | 57 kDa           | 8                         | 17%                 |
| 1173 | Bifunctional aminoacyl-tRNA synthetase OS=Homo sapiens GN=EPRS PE=1 SV=5                  | SYEP_HUMAN  | 171 kDa          | 18                        | 15%                 |
| 1174 | Phenylalanyl-tRNA synthetase alpha chain OS=Homo sapiens GN=FARSA PE=1 SV=3               | SYFA_HUMAN  | 58 kDa           | 2                         | 4.70%               |
| 1175 | Phenylalanyl-tRNA synthetase beta chain OS=Homo sapiens GN=FARSB PE=1 SV=3                | SYFB_HUMAN  | 66 kDa           | 6                         | 9.20%               |
| 1176 | Glycyl-tRNA synthetase OS=Homo sapiens GN=GARS PE=1 SV=3                                  | SYG_HUMAN   | 83 kDa           | 8                         | 9.50%               |
| 1177 | Histidyl-tRNA synthetase, cytoplasmic OS=Homo sapiens GN=HARS PE=1 SV=2                   | SYHC_HUMAN  | 57 kDa           | 7                         | 15%                 |
| 1178 | Isoleucyl-tRNA synthetase, cytoplasmic OS=Homo sapiens GN=IARS PE=1 SV=2                  | SYIC_HUMAN  | 145 kDa          | 3                         | 2.90%               |
| 1179 | Lysyl-tRNA synthetase OS=Homo sapiens GN=KARS PE=1 SV=3                                   | SYK_HUMAN   | 68 kDa           | 8                         | 15%                 |
| 1180 | Leucyl-tRNA synthetase, cytoplasmic OS=Homo sapiens GN=LARS PE=1 SV=2                     | SYLC_HUMAN  | 134 kDa          | 5                         | 5.30%               |
| 1181 | Asparaginyl-tRNA synthetase, cytoplasmic OS=Homo sapiens GN=NARS PE=1 SV=1                | SYNC_HUMAN  | 63 kDa           | 8                         | 17%                 |
| 1182 | Glutaminyl-tRNA synthetase OS=Homo sapiens GN=QARS PE=1 SV=1                              | SYQ_HUMAN   | 88 kDa           | 7                         | 10%                 |
| 1183 | Arginyl-tRNA synthetase, cytoplasmic OS=Homo sapiens GN=RARS PE=1 SV=2                    | SYRC_HUMAN  | 75 kDa           | 9                         | 15%                 |
| 1184 | Seryl-tRNA synthetase, cytoplasmic OS=Homo sapiens GN=SARS PE=1 SV=3                      | SYSC_HUMAN  | 59 kDa           | 7                         | 14%                 |
| 1185 | Threonyl-tRNA synthetase, cytoplasmic OS=Homo sapiens GN=TARS PE=1 SV=3                   | SYTC_HUMAN  | 83 kDa           | 14                        | 19%                 |
| 1186 | Valyl-tRNA synthetase OS=Homo sapiens GN=VARA PE=1 SV=4                                   | SYVC_HUMAN  | 140 kDa          | 7                         | 7.00%               |
| 1187 | Tryptophanyl-tRNA synthetase, cytoplasmic OS=Homo sapiens GN=WARS PE=1 SV=2               | SYWC_HUMAN  | 53 kDa           | 16                        | 41%                 |

| #    | Proteins                                                                            | Uniprot ID  | Molecular Weight | Number of unique peptides | Percent of coverage |
|------|-------------------------------------------------------------------------------------|-------------|------------------|---------------------------|---------------------|
| 1188 | Tyrosyl-tRNA synthetase, cytoplasmic OS=Homo sapiens GN=YARS PE=1 SV=4              | SYYC_HUMAN  | 59 kDa           | 7                         | 14%                 |
| 1189 | Transmembrane protein 132A OS=Homo sapiens GN=TMEM132A PE=2 SV=1                    | T132A_HUMAN | 110 kDa          | 4                         | 5.80%               |
| 1190 | Tandem C2 domains nuclear protein OS=Homo sapiens GN=TC2N PE=1 SV=2                 | TAC2N_HUMAN | 55 kDa           | 4                         | 9.60%               |
| 1191 | Tumor-associated calcium signal transducer 2 OS=Homo sapiens GN=TACSTD2 PE=1 SV=3   | TACD2_HUMAN | 36 kDa           | 3                         | 12%                 |
| 1192 | Transgelin-2 OS=Homo sapiens GN=TAGLN2 PE=1 SV=3                                    | TAGL2_HUMAN | 22 kDa           | 10                        | 55%                 |
| 1193 | Transaldolase OS=Homo sapiens GN=TALDO1 PE=1 SV=2                                   | TALDO_HUMAN | 38 kDa           | 9                         | 28%                 |
| 1194 | Serine/threonine-protein kinase TAO3 OS=Homo sapiens GN=TAOK3 PE=1 SV=2             | TAOK3_HUMAN | 105 kDa          | 2                         | 1.90%               |
| 1195 | Tax1-binding protein 1 OS=Homo sapiens GN=TAX1BP1 PE=1 SV=2                         | TAXB1_HUMAN | 91 kDa           | 2                         | 2.40%               |
| 1196 | Tubulin alpha-1B chain OS=Homo sapiens GN=TUBA1B PE=1 SV=1                          | TBA1B_HUMAN | 50 kDa           | 11                        | 34%                 |
| 1197 | Tubulin beta chain OS=Homo sapiens GN=TUBB PE=1 SV=2                                | TBB5_HUMAN  | 50 kDa           | 12                        | 32%                 |
| 1198 | TBC1 domain family member 24 OS=Homo sapiens GN=TBC1D24 PE=1 SV=2                   | TBC24_HUMAN | 63 kDa           | 3                         | 7.20%               |
| 1199 | Tubulin-specific chaperone A OS=Homo sapiens GN=TBCA PE=1 SV=3                      | TBCA_HUMAN  | 13 kDa           | 7                         | 38%                 |
| 1200 | Tubulin-specific chaperone D OS=Homo sapiens GN=TBCE PE=1 SV=2                      | TBCD_HUMAN  | 133 kDa          | 2                         | 1.80%               |
| 1201 | TBC1 domain family member 4 OS=Homo sapiens GN=TBC1D4 PE=1 SV=2                     | TBCD4_HUMAN | 147 kDa          | 2                         | 2.10%               |
| 1202 | Transcobalamin-1 OS=Homo sapiens GN=TCN1 PE=1 SV=2                                  | TCO1_HUMAN  | 48 kDa           | 16                        | 42%                 |
| 1203 | T-complex protein 1 subunit alpha OS=Homo sapiens GN=TCP1 PE=1 SV=1                 | TCPA_HUMAN  | 60 kDa           | 20                        | 42%                 |
| 1204 | T-complex protein 1 subunit beta OS=Homo sapiens GN=CCT2 PE=1 SV=4                  | TCPB_HUMAN  | 57 kDa           | 17                        | 41%                 |
| 1205 | T-complex protein 1 subunit delta OS=Homo sapiens GN=CCT4 PE=1 SV=4                 | TCPD_HUMAN  | 58 kDa           | 10                        | 28%                 |
| 1206 | T-complex protein 1 subunit epsilon OS=Homo sapiens GN=CCT5 PE=1 SV=1               | TCPE_HUMAN  | 60 kDa           | 14                        | 33%                 |
| 1207 | T-complex protein 1 subunit gamma OS=Homo sapiens GN=CCT3 PE=1 SV=4                 | TCPG_HUMAN  | 61 kDa           | 17                        | 37%                 |
| 1208 | T-complex protein 1 subunit eta OS=Homo sapiens GN=CCT7 PE=1 SV=2                   | TCPH_HUMAN  | 59 kDa           | 15                        | 36%                 |
| 1209 | T-complex protein 1 subunit theta OS=Homo sapiens GN=CCT8 PE=1 SV=4                 | TCPQ_HUMAN  | 60 kDa           | 25                        | 47%                 |
| 1210 | T-complex protein 1 subunit zeta OS=Homo sapiens GN=CCT6A PE=1 SV=3                 | TCPZ_HUMAN  | 58 kDa           | 14                        | 33%                 |
| 1211 | Translationally-controlled tumor protein OS=Homo sapiens GN=TPT1 PE=1 SV=1          | TCTP_HUMAN  | 20 kDa           | 5                         | 32%                 |
| 1212 | Tudor domain-containing protein 6 OS=Homo sapiens GN=TDRD6 PE=2 SV=2                | TDRD6_HUMAN | 237 kDa          | 2                         | 0.62%               |
| 1213 | Prostaglandin E synthase 3 OS=Homo sapiens GN=PTGES3 PE=1 SV=1                      | TEBP_HUMAN  | 19 kDa           | 3                         | 23%                 |
| 1214 | Tenascin OS=Homo sapiens GN=TNC PE=1 SV=3                                           | TENA_HUMAN  | 241 kDa          | 95                        | 56%                 |
| 1215 | Transitional endoplasmic reticulum ATPase OS=Homo sapiens GN=VCP PE=1 SV=4          | TERA_HUMAN  | 89 kDa           | 37                        | 47%                 |
| 1216 | Tetranectin OS=Homo sapiens GN=CLEC3B PE=1 SV=3                                     | TETN_HUMAN  | 23 kDa           | 5                         | 34%                 |
| 1217 | Protein TFG OS=Homo sapiens GN=TFG PE=1 SV=2                                        | TFG_HUMAN   | 43 kDa           | 5                         | 13%                 |
| 1218 | Transforming growth factor beta receptor type 3 OS=Homo sapiens GN=TGFB3 PE=1 SV=3  | TGBR3_HUMAN | 94 kDa           | 7                         | 10%                 |
| 1219 | Transforming growth factor beta-2 OS=Homo sapiens GN=TGFB2 PE=1 SV=1                | TGFB2_HUMAN | 48 kDa           | 2                         | 4.30%               |
| 1220 | Trans-Golgi network integral membrane protein 2 OS=Homo sapiens GN=TGOLN2 PE=1 SV=2 | TGON2_HUMAN | 51 kDa           | 12                        | 28%                 |
| 1221 | Thyroxine-binding globulin OS=Homo sapiens GN=SERPINA7 PE=1 SV=2                    | THBG_HUMAN  | 46 kDa           | 9                         | 22%                 |
| 1222 | Acetyl-CoA acetyltransferase, cytosolic OS=Homo sapiens GN=ACAT2 PE=1 SV=2          | THIC_HUMAN  | 41 kDa           | 13                        | 55%                 |
| 1223 | 3-ketoacyl-CoA thiolase, peroxisomal OS=Homo sapiens GN=ACAA1 PE=1 SV=2             | THIK_HUMAN  | 44 kDa           | 2                         | 6.40%               |
| 1224 | Thioredoxin OS=Homo sapiens GN=TXN PE=1 SV=3                                        | THIO_HUMAN  | 12 kDa           | 6                         | 54%                 |
| 1225 | Prothrombin OS=Homo sapiens GN=F2 PE=1 SV=2                                         | THRB_HUMAN  | 70 kDa           | 19                        | 42%                 |
| 1226 | 3-mercaptopyruvate sulfurtransferase OS=Homo sapiens GN=MPST PE=1 SV=3              | THTM_HUMAN  | 33 kDa           | 2                         | 7.40%               |

| #    | Proteins                                                                                                    | Uniprot ID       | Molecular Weight | Number of unique peptides | Percent of coverage |
|------|-------------------------------------------------------------------------------------------------------------|------------------|------------------|---------------------------|---------------------|
| 1227 | Tyrosine-protein kinase receptor Tie-1 OS=Homo sapiens GN=TIE1 PE=1 SV=1                                    | TIE1_HUMAN       | 125 kDa          | 2                         | 1.40%               |
| 1228 | Retinoic acid receptor responder protein 1 OS=Homo sapiens GN=RARRES1 PE=2 SV=2                             | TIG1_HUMAN       | 33 kDa           | 2                         | 7.50%               |
| 1229 | Metalloproteinase inhibitor 1 OS=Homo sapiens GN=TIMP1 PE=1 SV=1                                            | TIMP1_HUMAN      | 23 kDa           | 6                         | 42%                 |
| 1230 | Metalloproteinase inhibitor 4 OS=Homo sapiens GN=TIMP4 PE=1 SV=1                                            | TIMP4_HUMAN      | 26 kDa           | 4                         | 22%                 |
| 1231 | T-cell immunomodulatory protein OS=Homo sapiens GN=ITFG1 PE=1 SV=1                                          | TIP_HUMAN        | 68 kDa           | 4                         | 9.20%               |
| 1232 | Titin OS=Homo sapiens GN=TTN PE=1 SV=2                                                                      | TITIN_HUMAN      | 3816 kDa         | 2                         | 0.04%               |
| 1233 | Transketolase OS=Homo sapiens GN=TKT PE=1 SV=3                                                              | TKT_HUMAN        | 68 kDa           | 21                        | 47%                 |
| 1234 | Talin-1 OS=Homo sapiens GN=TLN1 PE=1 SV=3                                                                   | TLN1_HUMAN       | 270 kDa          | 18                        | 9.50%               |
| 1235 | Toll-like receptor 2 OS=Homo sapiens GN=TLR2 PE=1 SV=1                                                      | TLR2_HUMAN       | 90 kDa           | 15                        | 23%                 |
| 1236 | TOM1-like protein 1 OS=Homo sapiens GN=TOM1L1 PE=1 SV=2                                                     | TM1L1_HUMAN      | 53 kDa           | 2                         | 4.60%               |
| 1237 | Transmembrane channel-like protein 5 OS=Homo sapiens GN=TMC5 PE=2 SV=3                                      | TMC5_HUMAN       | 115 kDa          | 6                         | 8.30%               |
| 1238 | Thymosin beta-4-like protein 3 OS=Homo sapiens GN=TMSL3 PE=2 SV=1                                           | TMSL3_HUMAN (+1) | 5 kDa            | 2                         | 41%                 |
| 1239 | Tumor necrosis factor ligand superfamily member 10 OS=Homo sapiens GN=TNFSF10 PE=1 SV=1                     | TNF10_HUMAN      | 33 kDa           | 6                         | 21%                 |
| 1240 | Tumor necrosis factor ligand superfamily member 13 OS=Homo sapiens GN=TNFSF13 PE=1 SV=1                     | TNF13_HUMAN      | 27 kDa           | 5                         | 16%                 |
| 1241 | Transportin-1 OS=Homo sapiens GN=TNPO1 PE=1 SV=2                                                            | TNPO1_HUMAN      | 102 kDa          | 3                         | 4.50%               |
| 1242 | Transportin-2 OS=Homo sapiens GN=TNPO2 PE=1 SV=3                                                            | TNPO2_HUMAN      | 101 kDa          | 2                         | 3.60%               |
| 1243 | Toll-interacting protein OS=Homo sapiens GN=TOLLIP PE=1 SV=1                                                | TOLIP_HUMAN      | 30 kDa           | 3                         | 11%                 |
| 1244 | Target of Myb protein 1 OS=Homo sapiens GN=TOM1 PE=1 SV=2                                                   | TOM1_HUMAN       | 54 kDa           | 5                         | 12%                 |
| 1245 | Tumor protein D52 OS=Homo sapiens GN=TPD52 PE=1 SV=2                                                        | TPD52_HUMAN      | 24 kDa           | 7                         | 38%                 |
| 1246 | Tumor protein D53 OS=Homo sapiens GN=TPD52L1 PE=1 SV=1                                                      | TPD53_HUMAN      | 22 kDa           | 3                         | 15%                 |
| 1247 | Triosephosphate isomerase OS=Homo sapiens GN=TPI1 PE=1 SV=2                                                 | TPIS_HUMAN       | 27 kDa           | 17                        | 84%                 |
| 1248 | Tropomyosin alpha-1 chain OS=Homo sapiens GN=TPM1 PE=1 SV=2                                                 | TPM1_HUMAN       | 33 kDa           | 3                         | 18%                 |
| 1249 | Tropomyosin alpha-3 chain OS=Homo sapiens GN=TPM3 PE=1 SV=1                                                 | TPM3_HUMAN       | 33 kDa           | 4                         | 25%                 |
| 1250 | Tropomyosin alpha-4 chain OS=Homo sapiens GN=TPM4 PE=1 SV=3                                                 | TPM4_HUMAN       | 29 kDa           | 18                        | 49%                 |
| 1251 | Tripeptidyl-peptidase 1 OS=Homo sapiens GN=TPP1 PE=1 SV=2                                                   | TPP1_HUMAN       | 61 kDa           | 4                         | 15%                 |
| 1252 | Tumor necrosis factor receptor superfamily member 11B OS=Homo sapiens GN=TNFRSF11B PE=1 SV=3                | TR11B_HUMAN      | 46 kDa           | 18                        | 51%                 |
| 1253 | Serotransferrin OS=Homo sapiens GN=TF PE=1 SV=3                                                             | TRFE_HUMAN       | 77 kDa           | 47                        | 62%                 |
| 1254 | Lactotransferrin OS=Homo sapiens GN=LTF PE=1 SV=6                                                           | TRFL_HUMAN       | 78 kDa           | 84                        | 88%                 |
| 1255 | Thioredoxin reductase 1, cytoplasmic OS=Homo sapiens GN=TXNRD1 PE=1 SV=3                                    | TRXR1_HUMAN      | 71 kDa           | 9                         | 13%                 |
| 1256 | Trypsin-1 OS=Homo sapiens GN=PRSS1 PE=1 SV=1                                                                | TRY1_HUMAN       | 27 kDa           | 3                         | 15%                 |
| 1257 | Tumor susceptibility gene 101 protein OS=Homo sapiens GN=TSG101 PE=1 SV=2                                   | TS101_HUMAN      | 44 kDa           | 2                         | 4.40%               |
| 1258 | Translin OS=Homo sapiens GN=TSN PE=1 SV=1                                                                   | TSN_HUMAN        | 26 kDa           | 7                         | 30%                 |
| 1259 | Tetraspanin-6 OS=Homo sapiens GN=TSPAN6 PE=1 SV=1                                                           | TSN6_HUMAN       | 28 kDa           | 2                         | 10%                 |
| 1260 | Tetraspanin-9 OS=Homo sapiens GN=TSPAN9 PE=1 SV=1                                                           | TSN9_HUMAN       | 27 kDa           | 3                         | 15%                 |
| 1261 | Translin-associated protein X OS=Homo sapiens GN=TSNAX PE=1 SV=1                                            | TSNAX_HUMAN      | 33 kDa           | 3                         | 20%                 |
| 1262 | Thrombospondin-1 OS=Homo sapiens GN=THBS1 PE=1 SV=2                                                         | TSP1_HUMAN       | 129 kDa          | 36                        | 35%                 |
| 1263 | Thrombospondin-3 OS=Homo sapiens GN=THBS3 PE=1 SV=1                                                         | TSP3_HUMAN       | 104 kDa          | 3                         | 3.20%               |
| 1264 | Thrombospondin-4 OS=Homo sapiens GN=THBS4 PE=1 SV=2                                                         | TSP4_HUMAN       | 106 kDa          | 3                         | 4.30%               |
| 1265 | Thiosulfate sulfurtransferase/rhodanese-like domain-containing protein 1 OS=Homo sapiens GN=TSTD1 PE=1 SV=3 | TSTD1_HUMAN      | 13 kDa           | 2                         | 19%                 |
| 1266 | Transthyretin OS=Homo sapiens GN=TTR PE=1 SV=1                                                              | TTHY_HUMAN       | 16 kDa           | 11                        | 73%                 |
| 1267 | Protein tweety homolog 3 OS=Homo sapiens GN=TTYH3 PE=1 SV=3                                                 | TTYH3_HUMAN      | 58 kDa           | 2                         | 4.20%               |



| #    | Proteins                                                                                   | Uniprot ID       | Molecular Weight | Number of unique peptides | Percent of coverage |
|------|--------------------------------------------------------------------------------------------|------------------|------------------|---------------------------|---------------------|
| 1268 | Terminal uridylyltransferase 4 OS=Homo sapiens GN=ZCCHC11 PE=1 SV=3                        | TUT4_HUMAN       | 185 kDa          | 3                         | 2.70%               |
| 1269 | Twinfilin-1 OS=Homo sapiens GN=TWFI PE=1 SV=3                                              | TWFI_HUMAN       | 40 kDa           | 6                         | 23%                 |
| 1270 | Twinfilin-2 OS=Homo sapiens GN=TW2 PE=1 SV=2                                               | TW2_HUMAN        | 40 kDa           | 10                        | 38%                 |
| 1271 | Thioredoxin domain-containing protein 12 OS=Homo sapiens GN=TXNDC12 PE=1 SV=1              | TXD12_HUMAN      | 19 kDa           | 2                         | 14%                 |
| 1272 | Thioredoxin domain-containing protein 16 OS=Homo sapiens GN=TXNDC16 PE=2 SV=4              | TXD16_HUMAN      | 94 kDa           | 4                         | 5.70%               |
| 1273 | Thioredoxin domain-containing protein 17 OS=Homo sapiens GN=TXNDC17 PE=1 SV=1              | TXD17_HUMAN      | 14 kDa           | 5                         | 45%                 |
| 1274 | Thioredoxin domain-containing protein 5 OS=Homo sapiens GN=TXNDC5 PE=1 SV=2                | TXND5_HUMAN      | 48 kDa           | 6                         | 22%                 |
| 1275 | Thioredoxin-like protein 1 OS=Homo sapiens GN=TXNL1 PE=1 SV=3                              | TXNL1_HUMAN      | 32 kDa           | 4                         | 24%                 |
| 1276 | Thymosin beta-10 OS=Homo sapiens GN=TMSB10 PE=1 SV=2                                       | TYB10_HUMAN      | 5 kDa            | 2                         | 50%                 |
| 1277 | Thymidine phosphorylase OS=Homo sapiens GN=TYMP PE=1 SV=2                                  | TYPH_HUMAN       | 50 kDa           | 3                         | 9.30%               |
| 1278 | UDP-N-acetylhexosamine pyrophosphorylase OS=Homo sapiens GN=UAP1 PE=1 SV=3                 | UAP1_HUMAN       | 59 kDa           | 4                         | 9.40%               |
| 1279 | Ubiquitin-conjugating enzyme E2 D2 OS=Homo sapiens GN=UBE2D2 PE=1 SV=1                     | UB2D2_HUMAN (+1) | 17 kDa           | 2                         | 20%                 |
| 1280 | Ubiquitin-conjugating enzyme E2 L3 OS=Homo sapiens GN=UBE2L3 PE=1 SV=1                     | UB2L3_HUMAN      | 18 kDa           | 6                         | 42%                 |
| 1281 | Ubiquitin-conjugating enzyme E2 variant 1 OS=Homo sapiens GN=UBE2V1 PE=1 SV=2              | UB2V1_HUMAN      | 16 kDa           | 5                         | 34%                 |
| 1282 | Ubiquitin-like modifier-activating enzyme 1 OS=Homo sapiens GN=UBA1 PE=1 SV=3              | UBA1_HUMAN       | 118 kDa          | 26                        | 33%                 |
| 1283 | NEDD8-activating enzyme E1 catalytic subunit OS=Homo sapiens GN=UBA3 PE=1 SV=2             | UBA3_HUMAN       | 52 kDa           | 2                         | 8.00%               |
| 1284 | Ubiquitin-like modifier-activating enzyme 5 OS=Homo sapiens GN=UBA5 PE=1 SV=1              | UBA5_HUMAN       | 45 kDa           | 5                         | 22%                 |
| 1285 | Ubiquitin-conjugating enzyme E2 K OS=Homo sapiens GN=UBE2K PE=1 SV=3                       | UBE2K_HUMAN      | 22 kDa           | 2                         | 13%                 |
| 1286 | Ubiquitin-conjugating enzyme E2 N OS=Homo sapiens GN=UBE2N PE=1 SV=1                       | UBE2N_HUMAN      | 17 kDa           | 8                         | 53%                 |
| 1287 | Ubiquitin carboxyl-terminal hydrolase 14 OS=Homo sapiens GN=USP14 PE=1 SV=3                | UBP14_HUMAN      | 56 kDa           | 5                         | 14%                 |
| 1288 | Ubiquitin carboxyl-terminal hydrolase 15 OS=Homo sapiens GN=USP15 PE=1 SV=3                | UBP15_HUMAN      | 112 kDa          | 3                         | 3.00%               |
| 1289 | Ubiquitin carboxyl-terminal hydrolase 47 OS=Homo sapiens GN=USP47 PE=1 SV=3                | UBP47_HUMAN      | 157 kDa          | 4                         | 2.60%               |
| 1290 | Ubiquitin carboxyl-terminal hydrolase 5 OS=Homo sapiens GN=USP5 PE=1 SV=2                  | UBP5_HUMAN       | 96 kDa           | 7                         | 11%                 |
| 1291 | Ubiquitin-1 OS=Homo sapiens GN=UBQLN1 PE=1 SV=2                                            | UBQL1_HUMAN      | 63 kDa           | 3                         | 10%                 |
| 1292 | E3 ubiquitin-protein ligase UBR4 OS=Homo sapiens GN=UBR4 PE=1 SV=1                         | UBR4_HUMAN       | 574 kDa          | 5                         | 1.10%               |
| 1293 | Ubiquitin carboxyl-terminal hydrolase isozyme L3 OS=Homo sapiens GN=UCHL3 PE=1 SV=1        | UCHL3_HUMAN      | 26 kDa           | 5                         | 27%                 |
| 1294 | Ubiquitin-fold modifier-conjugating enzyme 1 OS=Homo sapiens GN=UFC1 PE=1 SV=3             | UFC1_HUMAN       | 19 kDa           | 2                         | 10%                 |
| 1295 | Ubiquitin-fold modifier 1 OS=Homo sapiens GN=UFM1 PE=1 SV=1                                | UFM1_HUMAN       | 9 kDa            | 4                         | 68%                 |
| 1296 | UDP-glucose:glycoprotein glucosyltransferase 1 OS=Homo sapiens GN=UGGT1 PE=1 SV=3          | UGGG1_HUMAN      | 177 kDa          | 5                         | 4.10%               |
| 1297 | UTP--glucose-1-phosphate uridylyltransferase OS=Homo sapiens GN=UGP2 PE=1 SV=5             | UGPA_HUMAN       | 57 kDa           | 40                        | 72%                 |
| 1298 | Urokinase plasminogen activator surface receptor OS=Homo sapiens GN=PLAUR PE=1 SV=1        | UPAR_HUMAN       | 37 kDa           | 3                         | 17%                 |
| 1299 | General vesicular transport factor p115 OS=Homo sapiens GN=USO1 PE=1 SV=2                  | USO1_HUMAN       | 108 kDa          | 8                         | 9.90%               |
| 1300 | Vesicle-associated membrane protein-associated protein A OS=Homo sapiens GN=VAPA PE=1 SV=3 | VAPA_HUMAN       | 28 kDa           | 5                         | 23%                 |
| 1301 | V-type proton ATPase subunit S1 OS=Homo sapiens GN=ATP6AP1 PE=1 SV=2                       | VAS1_HUMAN       | 52 kDa           | 7                         | 21%                 |
| 1302 | Vasorin OS=Homo sapiens GN=VASN PE=1 SV=1                                                  | VASN_HUMAN       | 72 kDa           | 2                         | 4.50%               |
| 1303 | Vasodilator-stimulated phosphoprotein OS=Homo sapiens GN=VASP PE=1 SV=3                    | VASP_HUMAN       | 40 kDa           | 2                         | 6.80%               |
| 1304 | Synaptic vesicle membrane protein VAT-1 homolog OS=Homo sapiens GN=VAT1 PE=1 SV=2          | VAT1_HUMAN       | 42 kDa           | 7                         | 26%                 |

| #    | Proteins                                                                                         | Uniprot ID  | Molecular Weight | Number of unique peptides | Percent of coverage |
|------|--------------------------------------------------------------------------------------------------|-------------|------------------|---------------------------|---------------------|
| 1305 | V-type proton ATPase catalytic subunit A OS=Homo sapiens GN=ATP6V1A PE=1 SV=2                    | VATA_HUMAN  | 68 kDa           | 3                         | 5.50%               |
| 1306 | V-type proton ATPase subunit B, brain isoform OS=Homo sapiens GN=ATP6V1B2 PE=1 SV=3              | VATB2_HUMAN | 57 kDa           | 4                         | 14%                 |
| 1307 | Vascular cell adhesion protein 1 OS=Homo sapiens GN=VCAM1 PE=1 SV=1                              | VCAM1_HUMAN | 81 kDa           | 4                         | 6.60%               |
| 1308 | Vimentin OS=Homo sapiens GN=VIM PE=1 SV=4                                                        | VIME_HUMAN  | 54 kDa           | 2                         | 4.90%               |
| 1309 | Vinculin OS=Homo sapiens GN=VCL PE=1 SV=4                                                        | VINC_HUMAN  | 124 kDa          | 11                        | 12%                 |
| 1310 | Vacuolar protein sorting-associated protein 29 OS=Homo sapiens GN=VPS29 PE=1 SV=1                | VPS29_HUMAN | 21 kDa           | 3                         | 18%                 |
| 1311 | Vacuolar protein sorting-associated protein 35 OS=Homo sapiens GN=VPS35 PE=1 SV=2                | VPS35_HUMAN | 92 kDa           | 7                         | 10%                 |
| 1312 | Vacuolar protein sorting-associated protein 4B OS=Homo sapiens GN=VPS4B PE=1 SV=2                | VPS4B_HUMAN | 49 kDa           | 3                         | 7.90%               |
| 1313 | Putative V-set and immunoglobulin domain-containing protein 6 OS=Homo sapiens GN=VSIG6 PE=5 SV=2 | VSIG6_HUMAN | 14 kDa           | 3                         | 18%                 |
| 1314 | V-set domain-containing T-cell activation inhibitor 1 OS=Homo sapiens GN=VTCN1 PE=1 SV=1         | VTCN1_HUMAN | 31 kDa           | 4                         | 14%                 |
| 1315 | Vitamin D-binding protein OS=Homo sapiens GN=GC PE=1 SV=1                                        | VTDB_HUMAN  | 53 kDa           | 30                        | 69%                 |
| 1316 | Vitronectin OS=Homo sapiens GN=VTN PE=1 SV=1                                                     | VTNC_HUMAN  | 54 kDa           | 10                        | 32%                 |
| 1317 | von Willebrand factor A domain-containing protein 1 OS=Homo sapiens GN=VWA1 PE=2 SV=1            | VWA1_HUMAN  | 47 kDa           | 14                        | 56%                 |
| 1318 | WW domain-binding protein 2 OS=Homo sapiens GN=WBP2 PE=1 SV=1                                    | WBP2_HUMAN  | 28 kDa           | 4                         | 17%                 |
| 1319 | WD repeat-containing protein 1 OS=Homo sapiens GN=WDR1 PE=1 SV=4                                 | WDR1_HUMAN  | 66 kDa           | 20                        | 40%                 |
| 1320 | WD repeat-containing protein 65 OS=Homo sapiens GN=WDR65 PE=2 SV=3                               | WDR65_HUMAN | 145 kDa          | 2                         | 1.40%               |
| 1321 | WAP four-disulfide core domain protein 2 OS=Homo sapiens GN=WFDC2 PE=1 SV=2                      | WFDC2_HUMAN | 13 kDa           | 4                         | 45%                 |
| 1322 | Xanthine dehydrogenase/oxidase OS=Homo sapiens GN=XDH PE=1 SV=4                                  | XDH_HUMAN   | 146 kDa          | 85                        | 75%                 |
| 1323 | Exportin-1 OS=Homo sapiens GN=XPO1 PE=1 SV=1                                                     | XPO1_HUMAN  | 123 kDa          | 2                         | 1.70%               |
| 1324 | Exportin-T OS=Homo sapiens GN=XPOT PE=1 SV=2                                                     | XPOT_HUMAN  | 110 kDa          | 2                         | 2.20%               |
| 1325 | Xaa-Pro aminopeptidase 1 OS=Homo sapiens GN=XPNPEP1 PE=1 SV=3                                    | XPP1_HUMAN  | 70 kDa           | 10                        | 19%                 |
| 1326 | Protein XRP2 OS=Homo sapiens GN=RP2 PE=1 SV=4                                                    | XRP2_HUMAN  | 40 kDa           | 3                         | 5.70%               |
| 1327 | Xylosyltransferase 1 OS=Homo sapiens GN=XYLT1 PE=1 SV=1                                          | XYLT1_HUMAN | 108 kDa          | 3                         | 3.00%               |
| 1328 | Nuclease-sensitive element-binding protein 1 OS=Homo sapiens GN=YBX1 PE=1 SV=3                   | YBOX1_HUMAN | 36 kDa           | 4                         | 20%                 |
| 1329 | Synaptobrevin homolog YKT6 OS=Homo sapiens GN=YKT6 PE=1 SV=1                                     | YKT6_HUMAN  | 22 kDa           | 9                         | 52%                 |
| 1330 | Zinc finger protein 804B OS=Homo sapiens GN=ZNF804B PE=1 SV=2                                    | Z804B_HUMAN | 153 kDa          | 2                         | 1.10%               |
| 1331 | Zinc-alpha-2-glycoprotein OS=Homo sapiens GN=AZGP1 PE=1 SV=2                                     | ZA2G_HUMAN  | 34 kDa           | 23                        | 61%                 |
| 1332 | Zymogen granule protein 16 homolog B OS=Homo sapiens GN=ZG16B PE=1 SV=3                          | ZG16B_HUMAN | 23 kDa           | 7                         | 49%                 |
| 1333 | Protein Z-dependent protease inhibitor OS=Homo sapiens GN=SERPINA10 PE=1 SV=1                    | ZPI_HUMAN   | 51 kDa           | 2                         | 5.90%               |
