# Supplementary material for: Quantitative Analysis of the Human Milk Whey Proteome Reveals Developing Milk and Mammary-Gland Functions across the First Year of Lactation
Source: MDPI journal article supplement (doi:10.3390/proteomes1020128), 2013-09-03
Supplement: s1 [file s1]

**Supplementary Dataset 2.** List of 615 quantified human milk whey proteins during the first 12 months of lactation.

| No. | Uniprot ID  | Gene symbol | <i>p</i> -value<br>(Subject)<br><sup>a)</sup> | <i>p</i> -value<br>(Time)<br><sup>b)</sup> | <i>p</i> -value<br>(1 mo vs.<br>0 mo)<br><sup>c)</sup> | Ratio<br>(1 mo<br>vs. 0<br>mo)<br><sup>d)</sup> | <i>p</i> -value<br>(3 mo<br>vs. 0<br>mo)<br><sup>c)</sup> | Ratio<br>(3 mo<br>vs. 0<br>mo)<br><sup>d)</sup> | <i>p</i> -value<br>(6 mo vs.<br>0 mo)<br><sup>c)</sup> | Ratio<br>(6 mo<br>vs. 0<br>mo)<br><sup>d)</sup> | <i>p</i> -value<br>(9 mo vs.<br>0 mo)<br><sup>c)</sup> | Ratio<br>(9 mo<br>vs. 0<br>mo)<br><sup>d)</sup> | <i>p</i> -value<br>(12 mo vs.<br>0 mo)<br><sup>c)</sup> | Ratio<br>(12 mo<br>vs. 0<br>mo)<br><sup>d)</sup> |
|-----|-------------|-------------|-----------------------------------------------|--------------------------------------------|--------------------------------------------------------|-------------------------------------------------|-----------------------------------------------------------|-------------------------------------------------|--------------------------------------------------------|-------------------------------------------------|--------------------------------------------------------|-------------------------------------------------|---------------------------------------------------------|--------------------------------------------------|
| 1   | 1433B_HUMAN | YWHAB       | 6.6E-10                                       | 2.0E-08                                    | 7.0E-03                                                | 1.4                                             | 1.2E-05                                                   | 1.8                                             | 4.8E-08                                                | 2.2                                             | 4.4E-08                                                | 2.2                                             | 3.5E-07                                                 | 2.0                                              |
| 2   | 1433E_HUMAN | YWHAE       | 4.1E-10                                       | 2.9E-08                                    | 2.6E-02                                                | 1.3                                             | 9.2E-05                                                   | 1.7                                             | 2.3E-07                                                | 2.1                                             | 4.2E-08                                                | 2.2                                             | 7.3E-07                                                 | 2.0                                              |
| 3   | 1433F_HUMAN | YWHAH       | 1.8E-10                                       | 1.4E-09                                    | 3.6E-03                                                | 1.5                                             | 2.4E-06                                                   | 2.0                                             | 8.6E-09                                                | 2.3                                             | 1.8E-09                                                | 2.4                                             | 2.0E-07                                                 | 2.1                                              |
| 4   | 1433G_HUMAN | YWHAG       | 1.2E-10                                       | 4.1E-08                                    | 3.8E-03                                                | 1.5                                             | 1.8E-05                                                   | 1.8                                             | 5.6E-08                                                | 2.2                                             | 4.6E-08                                                | 2.2                                             | 6.5E-07                                                 | 2.0                                              |
| 5   | 1433S_HUMAN | SFN         | 1.9E-06                                       | 5.2E-09                                    | 7.1E-04                                                | 1.6                                             | 1.1E-05                                                   | 1.9                                             | 2.0E-08                                                | 2.3                                             | 3.3E-09                                                | 2.5                                             | 1.1E-07                                                 | 2.2                                              |
| 6   | 1433T_HUMAN | YWHAQ       | 1.0E-10                                       | 1.2E-08                                    | 6.2E-03                                                | 1.4                                             | 6.0E-06                                                   | 1.9                                             | 9.0E-09                                                | 2.3                                             | 1.4E-07                                                | 2.1                                             | 3.7E-07                                                 | 2.0                                              |
| 7   | 1433Z_HUMAN | YWHAZ       | 1.9E-11                                       | 5.6E-08                                    | 2.0E-03                                                | 1.5                                             | 1.7E-05                                                   | 1.8                                             | 5.3E-08                                                | 2.1                                             | 4.6E-08                                                | 2.2                                             | 7.8E-07                                                 | 2.0                                              |
| 8   | 2AAA_HUMAN  | PPP2R1A     | 7.1E-02                                       | 1.4E-01                                    | 6.1E-02                                                | 1.2                                             | 1.4E-02                                                   | 1.3                                             | 3.9E-02                                                | 1.2                                             | 2.2E-02                                                | 1.3                                             | 6.6E-02                                                 | 1.2                                              |
| 9   | 6PGD_HUMAN  | PGD         | 1.0E-09                                       | 3.2E-13                                    | 5.5E-06                                                | 1.9                                             | 1.2E-08                                                   | 2.4                                             | 2.8E-11                                                | 2.8                                             | 6.4E-13                                                | 3.1                                             | 1.0E-11                                                 | 2.9                                              |
| 10  | 6PGL_HUMAN  | PGLS        | 3.0E-03                                       | 6.2E-02                                    | 1.4E-01                                                | 1.2                                             | 2.2E-01                                                   | 1.1                                             | 4.4E-03                                                | 1.4                                             | 3.7E-02                                                | 1.3                                             | 1.7E-02                                                 | 1.3                                              |
| 11  | A1AG1_HUMAN | ORM1        | 6.0E-10                                       | 1.6E-24                                    | 7.0E-03                                                | 0.8                                             | 7.3E-15                                                   | 0.6                                             | 1.1E-14                                                | 0.6                                             | 1.2E-18                                                | 0.5                                             | 5.8E-21                                                 | 0.5                                              |
| 12  | A1AG2_HUMAN | ORM2        | 4.2E-08                                       | 4.8E-06                                    | 5.5E-02                                                | 0.9                                             | 1.6E-05                                                   | 0.7                                             | 4.5E-05                                                | 0.7                                             | 6.5E-06                                                | 0.7                                             | 2.4E-05                                                 | 0.7                                              |
| 13  | A1AT_HUMAN  | SERPINA1    | 1.7E-15                                       | 2.5E-19                                    | 1.7E-07                                                | 0.7                                             | 6.3E-15                                                   | 0.6                                             | 2.4E-17                                                | 0.6                                             | 1.3E-14                                                | 0.6                                             | 4.7E-17                                                 | 0.6                                              |
| 14  | A1BG_HUMAN  | A1BG        | 1.1E-12                                       | 1.0E-15                                    | 4.8E-03                                                | 0.8                                             | 9.4E-10                                                   | 0.6                                             | 4.0E-13                                                | 0.5                                             | 1.1E-12                                                | 0.5                                             | 3.7E-12                                                 | 0.5                                              |
| 15  | A2AP_HUMAN  | SERPINF2    | 1.7E-10                                       | 7.4E-04                                    | 7.6E-04                                                | 1.2                                             | 6.3E-04                                                   | 1.2                                             | 1.1E-03                                                | 1.2                                             | 3.0E-05                                                | 1.3                                             | 1.1E-02                                                 | 1.2                                              |
| 16  | A2GL_HUMAN  | LRG1        | 1.5E-17                                       | 2.7E-33                                    | 1.3E-18                                                | 0.5                                             | 2.3E-27                                                   | 0.4                                             | 4.4E-31                                                | 0.3                                             | 4.7E-28                                                | 0.4                                             | 5.9E-27                                                 | 0.4                                              |
| 17  | A2MG_HUMAN  | A2M         | 9.7E-20                                       | 1.2E-18                                    | 5.0E-01                                                | 1.0                                             | 3.5E-05                                                   | 0.8                                             | 7.8E-08                                                | 0.7                                             | 8.6E-12                                                | 0.7                                             | 2.2E-16                                                 | 0.6                                              |
| 18  | A4_HUMAN    | APP         | 5.5E-12                                       | 2.8E-21                                    | 1.1E-03                                                | 0.7                                             | 3.1E-07                                                   | 0.6                                             | 1.2E-15                                                | 0.4                                             | 7.1E-18                                                | 0.3                                             | 1.5E-17                                                 | 0.3                                              |
| 19  | AACT_HUMAN  | SERPINA3    | 3.9E-14                                       | 3.6E-06                                    | 1.0E-04                                                | 0.5                                             | 6.7E-05                                                   | 0.4                                             | 4.1E-07                                                | 0.3                                             | 1.4E-03                                                | 0.5                                             | 1.1E-01                                                 | 0.7                                              |
| 20  | AATC_HUMAN  | GOT1        | 1.5E-06                                       | 5.8E-07                                    | 3.3E-02                                                | 1.3                                             | 9.4E-04                                                   | 1.5                                             | 3.6E-07                                                | 2.0                                             | 3.2E-05                                                | 1.7                                             | 5.8E-07                                                 | 1.9                                              |
| 21  | ABCG2_HUMAN | ABCG2       | 1.8E-09                                       | 1.9E-06                                    | 3.2E-01                                                | 1.2                                             | 7.3E-03                                                   | 1.5                                             | 3.5E-07                                                | 2.2                                             | 1.2E-04                                                | 1.8                                             | 1.9E-04                                                 | 1.8                                              |
| 22  | ABHEB_HUMAN | ABHD14B     | 3.2E-06                                       | 1.8E-09                                    | 2.6E-02                                                | 1.4                                             | 2.0E-05                                                   | 1.9                                             | 9.9E-08                                                | 2.2                                             | 6.6E-10                                                | 2.6                                             | 2.1E-06                                                 | 2.0                                              |
| 23  | ACBP_HUMAN  | DBI         | 6.4E-07                                       | 3.6E-06                                    | 1.2E-03                                                | 1.4                                             | 6.9E-01                                                   | 1.0                                             | 7.5E-01                                                | 1.0                                             | 2.0E-02                                                | 0.8                                             | 6.7E-02                                                 | 0.8                                              |
| 24  | ACE_HUMAN   | ACE         | 3.2E-15                                       | 1.6E-11                                    | 3.8E-03                                                | 0.8                                             | 1.1E-07                                                   | 0.7                                             | 3.4E-07                                                | 0.7                                             | 1.6E-10                                                | 0.6                                             | 4.2E-11                                                 | 0.6                                              |
| 25  | ACLY_HUMAN  | ACLY        | 5.7E-11                                       | 2.8E-04                                    | 6.1E-03                                                | 1.7                                             | 2.2E-03                                                   | 1.8                                             | 1.2E-04                                                | 2.1                                             | 4.4E-05                                                | 2.3                                             | 7.3E-05                                                 | 2.2                                              |
| 26  | ACOC_HUMAN  | ACO1        | 3.9E-10                                       | 5.1E-07                                    | 3.4E-07                                                | 2.2                                             | 3.9E-07                                                   | 2.1                                             | 3.0E-05                                                | 1.8                                             | 2.7E-03                                                | 1.5                                             | 2.4E-02                                                 | 1.4                                              |
| 27  | ACSA_HUMAN  | ACSS2       | 7.2E-04                                       | 2.0E-01                                    | 1.3E-01                                                | 1.3                                             | 2.8E-02                                                   | 1.5                                             | 4.5E-02                                                | 1.4                                             | 2.9E-02                                                | 1.4                                             | 1.1E-01                                                 | 1.3                                              |
| 28  | ACTB_HUMAN  | ACTB        | 2.2E-06                                       | 1.9E-04                                    | 9.2E-03                                                | 1.3                                             | 2.4E-03                                                   | 1.4                                             | 1.5E-04                                                | 1.5                                             | 3.4E-05                                                | 1.6                                             | 9.6E-05                                                 | 1.6                                              |
| 29  | ACTG_HUMAN  | ACTG1       | 2.0E-05                                       | 8.2E-04                                    | 2.4E-04                                                | 1.7                                             | 5.9E-04                                                   | 1.6                                             | 2.1E-04                                                | 1.7                                             | 6.8E-02                                                | 1.3                                             | 2.0E-02                                                 | 1.4                                              |
| 30  | ACTN1_HUMAN | ACTN1       | 1.0E-10                                       | 9.5E-03                                    | 2.5E-01                                                | 1.2                                             | 2.0E-01                                                   | 1.2                                             | 3.7E-03                                                | 1.5                                             | 7.8E-04                                                | 1.6                                             | 8.3E-02                                                 | 1.2                                              |
| 31  | ACTN4_HUMAN | ACTN4       | 5.5E-11                                       | 4.4E-03                                    | 2.0E-01                                                | 1.2                                             | 8.4E-02                                                   | 1.3                                             | 2.0E-03                                                | 1.5                                             | 2.6E-04                                                | 1.6                                             | 5.1E-02                                                 | 1.3                                              |
| 32  | ADA10_HUMAN | ADAM10      | 1.6E-15                                       | 3.0E-09                                    | 2.9E-02                                                | 1.2                                             | 1.1E-04                                                   | 1.4                                             | 1.3E-05                                                | 1.4                                             | 1.3E-06                                                | 1.5                                             | 1.4E-10                                                 | 1.7                                              |
| 33  | ADA15_HUMAN | ADAM15      | 1.0E-01                                       | 2.2E-01                                    | 1.6E-01                                                | 0.9                                             | 8.8E-01                                                   | 1.0                                             | 3.5E-01                                                | 1.0                                             | 8.5E-01                                                | 1.0                                             | 2.6E-01                                                 | 1.0                                              |
| 34  | ADEC1_HUMAN | ADAMDEC1    | 3.8E-01                                       | 5.1E-03                                    | 6.2E-03                                                | 1.1                                             | 5.6E-04                                                   | 1.1                                             | 6.8E-03                                                | 1.1                                             | 2.2E-03                                                | 1.1                                             | 2.2E-03                                                 | 1.1                                              |
| 35  | AFAM_HUMAN  | AFM         | 2.6E-07                                       | 4.2E-13                                    | 2.0E-03                                                | 0.8                                             | 3.9E-06                                                   | 0.7                                             | 1.8E-09                                                | 0.6                                             | 4.3E-09                                                | 0.6                                             | 7.0E-14                                                 | 0.5                                              |
| 36  | AGM1_HUMAN  | PGM3        | 1.1E-02                                       | 3.3E-01                                    | 8.5E-02                                                | 1.2                                             | 4.5E-02                                                   | 1.3                                             | 8.4E-02                                                | 1.2                                             | 1.3E-01                                                | 1.2                                             | 3.6E-01                                                 | 1.1                                              |

| No. | Uniprot ID  | Gene symbol             | <i>p</i> -value<br>(Subject)<br><i>a)</i> | <i>p</i> -value<br>(Time)<br><i>b)</i> | <i>p</i> -value<br>(1 mo vs.<br>0 mo)<br><i>c)</i> | Ratio<br>(1 mo<br>vs. 0<br>mo)<br><i>d)</i> | <i>p</i> -value<br>(3 mo<br>vs. 0<br>mo)<br><i>c)</i> | Ratio<br>(3 mo<br>vs. 0<br>mo)<br><i>d)</i> | <i>p</i> -value<br>(6 mo vs.<br>0 mo)<br><i>c)</i> | Ratio<br>(6 mo<br>vs. 0<br>mo)<br><i>d)</i> | <i>p</i> -value<br>(9 mo vs.<br>0 mo)<br><i>c)</i> | Ratio<br>(9 mo<br>vs. 0<br>mo)<br><i>d)</i> | <i>p</i> -value<br>(12 mo vs.<br>0 mo)<br><i>c)</i> | Ratio<br>(12 mo<br>vs. 0<br>mo)<br><i>d)</i> |
|-----|-------------|-------------------------|-------------------------------------------|----------------------------------------|----------------------------------------------------|---------------------------------------------|-------------------------------------------------------|---------------------------------------------|----------------------------------------------------|---------------------------------------------|----------------------------------------------------|---------------------------------------------|-----------------------------------------------------|----------------------------------------------|
| 37  | AK1A1_HUMAN | AKR1A1                  | 7.3E-12                                   | 5.5E-12                                | 2.2E-06                                            | 2.0                                         | 1.2E-09                                               | 2.5                                         | 6.5E-12                                            | 3.0                                         | 1.1E-10                                            | 2.7                                         | 7.7E-10                                             | 2.6                                          |
| 38  | AK1C3_HUMAN | AKR1C3                  | 2.3E-06                                   | 1.2E-05                                | 1.6E-03                                            | 1.8                                         | 2.1E-04                                               | 2.0                                         | 1.7E-05                                            | 2.3                                         | 1.4E-05                                            | 2.3                                         | 4.4E-06                                             | 2.5                                          |
| 39  | AL1A1_HUMAN | ALDH1A1                 | 1.5E-07                                   | 1.3E-21                                | 1.9E-08                                            | 2.6                                         | 8.5E-16                                               | 4.4                                         | 3.2E-19                                            | 5.7                                         | 1.6E-19                                            | 5.8                                         | 2.3E-16                                             | 4.6                                          |
| 40  | AL1A3_HUMAN | ALDH1A3                 | 1.5E-10                                   | 5.7E-12                                | 2.5E-06                                            | 2.1                                         | 2.3E-10                                               | 2.9                                         | 1.2E-11                                            | 3.1                                         | 1.6E-10                                            | 2.9                                         | 2.4E-09                                             | 2.7                                          |
| 41  | AL1L1_HUMAN |                         | 2.1E-10                                   | 1.1E-17                                | 1.3E-06                                            | 2.1                                         | 2.5E-12                                               | 3.3                                         | 1.2E-15                                            | 4.1                                         | 6.4E-16                                            | 4.1                                         | 2.8E-14                                             | 3.7                                          |
| 42  | AL7A1_HUMAN | ALDH7A1                 | 5.5E-10                                   | 1.6E-05                                | 1.0E-02                                            | 1.3                                         | 1.1E-04                                               | 1.5                                         | 1.9E-06                                            | 1.7                                         | 1.3E-05                                            | 1.6                                         | 1.5E-04                                             | 1.5                                          |
| 43  | AL9A1_HUMAN | ALDH9A1                 | 3.7E-11                                   | 4.1E-09                                | 4.9E-05                                            | 1.8                                         | 1.8E-07                                               | 2.2                                         | 8.0E-10                                            | 2.7                                         | 6.1E-08                                            | 2.3                                         | 9.0E-08                                             | 2.3                                          |
| 44  | ALAT1_HUMAN | GPT                     | 2.3E-07                                   | 3.6E-07                                | 1.8E-03                                            | 1.7                                         | 7.3E-07                                               | 2.5                                         | 5.9E-08                                            | 2.8                                         | 9.7E-06                                            | 2.2                                         | 2.6E-03                                             | 1.7                                          |
| 45  | ALBU_HUMAN  | ALB                     | 9.4E-15                                   | 1.1E-27                                | 5.9E-20                                            | 1.6                                         | 1.3E-26                                               | 1.7                                         | 4.6E-25                                            | 1.7                                         | 2.1E-20                                            | 1.6                                         | 8.6E-18                                             | 1.5                                          |
| 46  | ALDOA_HUMAN | ALDOA                   | 5.7E-09                                   | 2.3E-12                                | 1.1E-04                                            | 1.7                                         | 4.0E-08                                               | 2.2                                         | 3.3E-11                                            | 2.7                                         | 5.6E-12                                            | 2.9                                         | 6.8E-10                                             | 2.5                                          |
| 47  | ALDOC_HUMAN | ALDOC                   | 1.7E-04                                   | 1.8E-10                                | 8.9E-04                                            | 1.7                                         | 2.3E-07                                               | 2.2                                         | 3.9E-09                                            | 2.5                                         | 2.4E-10                                            | 2.8                                         | 1.3E-08                                             | 2.5                                          |
| 48  | AMBP_HUMAN  | AMBP                    | 4.0E-02                                   | 3.5E-01                                | 1.8E-01                                            | 1.1                                         | 8.6E-01                                               | 1.0                                         | 5.3E-01                                            | 1.0                                         | 9.7E-01                                            | 1.0                                         | 2.6E-01                                             | 0.9                                          |
| 49  | AMPB_HUMAN  | RNPEP                   | 2.7E-04                                   | 1.5E-10                                | 3.0E-04                                            | 1.6                                         | 2.2E-07                                               | 2.1                                         | 4.0E-09                                            | 2.3                                         | 2.6E-09                                            | 2.4                                         | 2.8E-10                                             | 2.5                                          |
| 50  | AMPL_HUMAN  | LAP3                    | 7.2E-10                                   | 2.3E-24                                | 3.1E-05                                            | 1.9                                         | 1.4E-14                                               | 3.7                                         | 5.7E-19                                            | 4.9                                         | 1.2E-20                                            | 5.5                                         | 6.6E-20                                             | 5.2                                          |
| 51  | AMRP_HUMAN  | LRPAP1                  | 1.2E-04                                   | 1.4E-04                                | 2.1E-01                                            | 1.1                                         | 2.3E-04                                               | 1.5                                         | 4.1E-04                                            | 1.5                                         | 2.4E-04                                            | 1.5                                         | 1.2E-04                                             | 1.6                                          |
| 52  | AMY1_HUMAN  | AMY1B<br>AMY1C<br>AMY1A | 1.7E-06                                   | 4.3E-22                                | 4.7E-01                                            | 1.0                                         | 5.9E-06                                               | 0.8                                         | 4.9E-10                                            | 0.7                                         | 6.7E-15                                            | 0.7                                         | 4.5E-15                                             | 0.7                                          |
| 53  | ANAG_HUMAN  | NAGLU                   | 1.4E-03                                   | 1.9E-05                                | 5.5E-04                                            | 1.3                                         | 8.1E-07                                               | 1.5                                         | 7.4E-05                                            | 1.4                                         | 1.3E-03                                            | 1.3                                         | 4.7E-02                                             | 1.2                                          |
| 54  | ANG1_HUMAN  | ANG                     | 7.0E-01                                   | 2.3E-04                                | 1.2E-04                                            | 1.3                                         | 4.8E-05                                               | 1.3                                         | 1.1E-03                                            | 1.2                                         | 6.7E-04                                            | 1.2                                         | 5.1E-02                                             | 1.1                                          |
| 55  | ANGL4_HUMAN | ANGPTL4                 | 1.9E-07                                   | 7.2E-11                                | 1.6E-03                                            | 0.6                                         | 5.8E-06                                               | 0.5                                         | 1.1E-08                                            | 0.4                                         | 1.5E-11                                            | 0.3                                         | 7.7E-09                                             | 0.3                                          |
| 56  | ANGT_HUMAN  | AGT                     | 3.7E-10                                   | 2.8E-28                                | 6.2E-14                                            | 0.6                                         | 4.1E-19                                               | 0.5                                         | 5.1E-21                                            | 0.5                                         | 7.7E-24                                            | 0.5                                         | 4.3E-28                                             | 0.4                                          |
| 57  | ANT3_HUMAN  | SERPINC1                | 3.4E-11                                   | 1.6E-01                                | 1.6E-02                                            | 1.1                                         | 4.8E-02                                               | 1.1                                         | 3.7E-02                                            | 1.1                                         | 2.6E-02                                            | 1.1                                         | 8.3E-02                                             | 1.1                                          |
| 58  | APIB1_HUMAN | APIB1                   | 2.0E-02                                   | 3.1E-02                                | 6.6E-01                                            | 1.0                                         | 1.2E-01                                               | 1.1                                         | 2.5E-02                                            | 1.2                                         | 5.7E-02                                            | 1.2                                         | 3.3E-02                                             | 1.2                                          |
| 59  | APOA1_HUMAN | APOA1                   | 1.2E-11                                   | 1.3E-08                                | 1.6E-01                                            | 1.1                                         | 5.9E-01                                               | 1.0                                         | 8.8E-02                                            | 0.9                                         | 1.4E-03                                            | 0.8                                         | 1.5E-06                                             | 0.7                                          |
| 60  | APOA2_HUMAN | APOA2                   | 4.9E-10                                   | 8.5E-06                                | 5.4E-06                                            | 1.5                                         | 3.0E-04                                               | 1.4                                         | 2.7E-04                                            | 1.4                                         | 1.7E-03                                            | 1.3                                         | 4.7E-01                                             | 1.1                                          |
| 61  | APOA4_HUMAN | APOA4                   | 1.6E-16                                   | 8.8E-24                                | 2.2E-04                                            | 1.2                                         | 6.3E-01                                               | 1.0                                         | 4.0E-03                                            | 0.9                                         | 9.4E-11                                            | 0.7                                         | 2.2E-12                                             | 0.7                                          |
| 62  | APOB_HUMAN  | APOB                    | 1.4E-11                                   | 1.3E-13                                | 5.9E-04                                            | 0.7                                         | 8.9E-08                                               | 0.6                                         | 6.3E-08                                            | 0.5                                         | 7.4E-12                                            | 0.5                                         | 7.6E-14                                             | 0.4                                          |
| 63  | APOD_HUMAN  | APOD                    | 1.4E-11                                   | 1.1E-03                                | 1.6E-01                                            | 0.9                                         | 3.7E-04                                               | 0.8                                         | 1.9E-03                                            | 0.8                                         | 2.7E-01                                            | 0.9                                         | 6.7E-01                                             | 1.0                                          |
| 64  | APOE_HUMAN  | APOE                    | 1.8E-12                                   | 1.9E-10                                | 9.7E-01                                            | 1.0                                         | 2.9E-04                                               | 0.8                                         | 1.0E-04                                            | 0.8                                         | 1.1E-06                                            | 0.7                                         | 6.4E-09                                             | 0.7                                          |
| 65  | APOH_HUMAN  | APOH                    | 5.9E-08                                   | 3.5E-11                                | 8.3E-01                                            | 1.0                                         | 1.1E-03                                               | 0.7                                         | 1.9E-06                                            | 0.6                                         | 1.3E-09                                            | 0.5                                         | 3.1E-07                                             | 0.6                                          |
| 66  | APT_HUMAN   | APRT                    | 3.1E-06                                   | 2.9E-03                                | 1.6E-02                                            | 1.5                                         | 3.2E-03                                               | 1.6                                         | 3.3E-04                                            | 1.8                                         | 2.8E-03                                            | 1.6                                         | 2.0E-03                                             | 1.7                                          |
| 67  | ARC1B_HUMAN | ARPC1B                  | 3.5E-03                                   | 5.3E-04                                | 2.6E-01                                            | 1.2                                         | 4.6E-03                                               | 1.7                                         | 6.8E-03                                            | 1.6                                         | 2.8E-05                                            | 2.2                                         | 1.4E-03                                             | 1.8                                          |
| 68  | ARF1_HUMAN  | ARF1                    | 1.1E-08                                   | 5.8E-12                                | 8.6E-07                                            | 1.6                                         | 5.0E-09                                               | 1.8                                         | 6.6E-14                                            | 2.3                                         | 2.1E-08                                            | 1.8                                         | 6.9E-06                                             | 1.6                                          |
| 69  | ARF4_HUMAN  | ARF4                    | 1.2E-11                                   | 1.0E-08                                | 3.4E-04                                            | 1.6                                         | 6.5E-07                                               | 2.0                                         | 1.1E-10                                            | 2.6                                         | 1.3E-05                                            | 1.8                                         | 6.8E-05                                             | 1.7                                          |
| 70  | ARK72_HUMAN | AKR7A2                  | 6.2E-10                                   | 4.2E-10                                | 5.1E-07                                            | 2.2                                         | 7.9E-09                                               | 2.6                                         | 5.6E-10                                            | 2.8                                         | 1.6E-08                                            | 2.5                                         | 7.5E-09                                             | 2.6                                          |
| 71  | ARLY_HUMAN  | ASL                     | 5.3E-03                                   | 2.5E-06                                | 1.9E-02                                            | 1.4                                         | 5.3E-05                                               | 1.9                                         | 1.6E-06                                            | 2.3                                         | 2.1E-06                                            | 2.2                                         | 2.7E-05                                             | 2.0                                          |

| No. | Uniprot ID  | Gene symbol             | <i>p</i> -value<br>(Subject)<br><sup>a)</sup> | <i>p</i> -value<br>(Time)<br><sup>b)</sup> | <i>p</i> -value<br>(1 mo vs.<br>0 mo)<br><sup>c)</sup> | Ratio<br>(1 mo<br>vs. 0<br>mo)<br><sup>d)</sup> | <i>p</i> -value<br>(3 mo<br>vs. 0<br>mo)<br><sup>c)</sup> | Ratio<br>(3 mo<br>vs. 0<br>mo)<br><sup>d)</sup> | <i>p</i> -value<br>(6 mo vs.<br>0 mo)<br><sup>c)</sup> | Ratio<br>(6 mo<br>vs. 0<br>mo)<br><sup>d)</sup> | <i>p</i> -value<br>(9 mo vs.<br>0 mo)<br><sup>c)</sup> | Ratio<br>(9 mo<br>vs. 0<br>mo)<br><sup>d)</sup> | <i>p</i> -value<br>(12 mo vs.<br>0 mo)<br><sup>c)</sup> | Ratio<br>(12 mo<br>vs. 0<br>mo)<br><sup>d)</sup> |
|-----|-------------|-------------------------|-----------------------------------------------|--------------------------------------------|--------------------------------------------------------|-------------------------------------------------|-----------------------------------------------------------|-------------------------------------------------|--------------------------------------------------------|-------------------------------------------------|--------------------------------------------------------|-------------------------------------------------|---------------------------------------------------------|--------------------------------------------------|
| 72  | ARP2_HUMAN  | ACTR2                   | 9.5E-05                                       | 6.8E-04                                    | 7.5E-03                                                | 1.6                                             | 2.0E-04                                                   | 1.9                                             | 1.6E-04                                                | 1.9                                             | 4.8E-04                                                | 1.8                                             | 1.9E-03                                                 | 1.7                                              |
| 73  | ARP3_HUMAN  | ACTR3                   | 1.1E-02                                       | 1.7E-01                                    | 1.1E-01                                                | 1.2                                             | 3.9E-02                                                   | 1.3                                             | 2.9E-02                                                | 1.3                                             | 1.6E-02                                                | 1.3                                             | 8.6E-02                                                 | 1.2                                              |
| 74  | ARPC2_HUMAN | ARPC2                   | 3.7E-02                                       | 9.0E-02                                    | 6.3E-01                                                | 1.0                                             | 9.0E-02                                                   | 1.2                                             | 3.7E-02                                                | 1.2                                             | 9.5E-03                                                | 1.3                                             | 1.3E-01                                                 | 1.2                                              |
| 75  | ARPC3_HUMAN | ARPC3                   | 8.7E-01                                       | 4.0E-03                                    | 4.2E-04                                                | 1.3                                             | 1.1E-02                                                   | 1.2                                             | 1.3E-02                                                | 1.2                                             | 7.0E-04                                                | 1.3                                             | 6.2E-03                                                 | 1.3                                              |
| 76  | ARPC4_HUMAN | ARPC4<br>TTLL3          | 8.6E-06                                       | 9.5E-04                                    | 1.2E-01                                                | 1.3                                             | 1.3E-03                                                   | 1.7                                             | 1.2E-03                                                | 1.7                                             | 7.9E-05                                                | 2.0                                             | 2.3E-02                                                 | 1.5                                              |
| 77  | ARSA_HUMAN  | ARSA                    | 8.1E-01                                       | 7.7E-06                                    | 9.1E-03                                                | 1.2                                             | 4.7E-05                                                   | 1.3                                             | 1.1E-06                                                | 1.4                                             | 1.3E-05                                                | 1.3                                             | 2.8E-04                                                 | 1.3                                              |
| 78  | ASM3B_HUMAN | SMPDL3B                 | 3.8E-16                                       | 1.6E-16                                    | 1.2E-02                                                | 0.8                                             | 1.4E-11                                                   | 0.6                                             | 1.2E-08                                                | 0.7                                             | 6.1E-14                                                | 0.6                                             | 9.1E-14                                                 | 0.6                                              |
| 79  | ATRN_HUMAN  | ATRN                    | 2.0E-01                                       | 9.3E-03                                    | 9.1E-01                                                | 1.0                                             | 5.6E-02                                                   | 0.9                                             | 1.5E-02                                                | 0.9                                             | 9.5E-03                                                | 0.9                                             | 5.3E-03                                                 | 0.9                                              |
| 80  | B2MG_HUMAN  | B2M                     | 6.4E-09                                       | 3.8E-02                                    | 4.8E-01                                                | 1.0                                             | 5.8E-01                                                   | 1.0                                             | 8.0E-03                                                | 0.9                                             | 2.7E-02                                                | 0.9                                             | 7.6E-01                                                 | 1.0                                              |
| 81  | B3GN7_HUMAN | B3GNT7                  | 4.2E-04                                       | 8.2E-26                                    | 3.4E-03                                                | 0.7                                             | 6.0E-14                                                   | 0.4                                             | 3.9E-18                                                | 0.3                                             | 1.4E-22                                                | 0.2                                             | 1.1E-18                                                 | 0.3                                              |
| 82  | B4GT1_HUMAN | B4GALT1                 | 4.3E-13                                       | 5.9E-23                                    | 2.2E-04                                                | 0.8                                             | 1.0E-14                                                   | 0.6                                             | 8.2E-17                                                | 0.6                                             | 2.3E-18                                                | 0.6                                             | 1.7E-19                                                 | 0.5                                              |
| 83  | B7H6_HUMAN  |                         | 5.3E-09                                       | 8.3E-11                                    | 1.4E-07                                                | 1.7                                             | 6.2E-09                                                   | 1.9                                             | 3.0E-11                                                | 2.1                                             | 1.3E-08                                                | 1.8                                             | 1.5E-04                                                 | 1.5                                              |
| 84  | BGAL_HUMAN  | GLB1                    | 6.0E-04                                       | 3.0E-02                                    | 8.0E-02                                                | 1.2                                             | 3.8E-02                                                   | 1.2                                             | 6.9E-04                                                | 1.4                                             | 1.1E-01                                                | 1.2                                             | 1.1E-01                                                 | 1.2                                              |
| 85  | BLVRB_HUMAN | BLVRB                   | 5.4E-03                                       | 7.4E-09                                    | 1.7E-03                                                | 1.6                                             | 9.7E-06                                                   | 1.9                                             | 8.8E-09                                                | 2.5                                             | 7.0E-09                                                | 2.5                                             | 2.7E-07                                                 | 2.2                                              |
| 86  | BPNT1_HUMAN | BPNT1                   | 1.3E-03                                       | 7.4E-03                                    | 2.0E-01                                                | 1.2                                             | 2.8E-02                                                   | 1.3                                             | 3.0E-02                                                | 1.3                                             | 1.4E-03                                                | 1.5                                             | 7.9E-04                                                 | 1.6                                              |
| 87  | BT1A1_HUMAN | BTN1A1                  | 6.9E-17                                       | 7.5E-22                                    | 2.6E-03                                                | 1.3                                             | 1.6E-07                                                   | 1.5                                             | 2.9E-17                                                | 2.1                                             | 4.1E-17                                                | 2.1                                             | 4.1E-17                                                 | 2.1                                              |
| 88  | BTD_HUMAN   | BTD                     | 8.0E-06                                       | 1.1E-04                                    | 1.5E-02                                                | 0.8                                             | 4.7E-04                                                   | 0.8                                             | 1.2E-05                                                | 0.7                                             | 4.9E-05                                                | 0.7                                             | 4.6E-03                                                 | 0.8                                              |
| 89  | C1RL_HUMAN  | C1RL                    | 2.8E-05                                       | 6.3E-16                                    | 2.4E-04                                                | 0.8                                             | 5.5E-08                                                   | 0.7                                             | 1.5E-14                                                | 0.6                                             | 3.4E-13                                                | 0.6                                             | 5.7E-13                                                 | 0.6                                              |
| 90  | C1TC_HUMAN  | MTHFD1                  | 8.3E-01                                       | 2.8E-01                                    | 9.2E-01                                                | 1.0                                             | 2.1E-01                                                   | 1.1                                             | 1.8E-01                                                | 1.1                                             | 4.6E-02                                                | 1.2                                             | 3.9E-01                                                 | 1.1                                              |
| 91  | C4BPA_HUMAN | C4BPA                   | 1.6E-13                                       | 3.1E-18                                    | 8.5E-07                                                | 0.5                                             | 4.2E-13                                                   | 0.3                                             | 3.1E-17                                                | 0.2                                             | 3.9E-15                                                | 0.2                                             | 1.6E-15                                                 | 0.2                                              |
| 92  | CAB39_HUMAN | CAB39                   | 8.2E-09                                       | 4.1E-06                                    | 2.6E-02                                                | 1.2                                             | 1.8E-05                                                   | 1.5                                             | 5.6E-07                                                | 1.7                                             | 4.2E-04                                                | 1.4                                             | 3.2E-05                                                 | 1.5                                              |
| 93  | CAB45_HUMAN | SDF4                    | 1.7E-11                                       | 5.3E-03                                    | 1.4E-01                                                | 0.9                                             | 2.2E-02                                                   | 0.8                                             | 9.5E-03                                                | 0.8                                             | 6.3E-03                                                | 0.8                                             | 1.6E-04                                                 | 0.7                                              |
| 94  | CADH1_HUMAN | CDH1                    | 9.6E-04                                       | 5.5E-06                                    | 1.4E-01                                                | 0.8                                             | 4.9E-05                                                   | 0.5                                             | 7.5E-05                                                | 0.6                                             | 2.5E-06                                                | 0.5                                             | 1.4E-04                                                 | 0.6                                              |
| 95  | CAH2_HUMAN  | CA2                     | 2.0E-15                                       | 8.3E-09                                    | 8.1E-08                                                | 2.1                                             | 1.8E-08                                                   | 2.2                                             | 6.3E-06                                                | 1.9                                             | 1.1E-02                                                | 1.4                                             | 6.5E-02                                                 | 1.3                                              |
| 96  | CAH6_HUMAN  | CA6                     | 6.3E-13                                       | 1.8E-34                                    | 1.8E-02                                                | 0.8                                             | 1.1E-07                                                   | 0.7                                             | 2.4E-17                                                | 0.5                                             | 3.1E-26                                                | 0.4                                             | 2.7E-29                                                 | 0.3                                              |
| 97  | CALB2_HUMAN | CALB2                   | 3.7E-11                                       | 5.1E-28                                    | 5.2E-14                                                | 3.4                                             | 8.4E-21                                                   | 5.3                                             | 2.4E-24                                                | 6.7                                             | 3.3E-25                                                | 7.1                                             | 6.3E-24                                                 | 6.5                                              |
| 98  | CALL5_HUMAN | CALML5                  | 3.2E-04                                       | 9.8E-20                                    | 2.2E-09                                                | 2.5                                             | 6.0E-15                                                   | 3.8                                             | 9.4E-17                                                | 4.3                                             | 1.5E-17                                                | 4.5                                             | 1.1E-16                                                 | 4.3                                              |
| 99  | CALM_HUMAN  | CALM1<br>CALM2<br>CALM3 | 3.2E-08                                       | 1.3E-08                                    | 8.7E-03                                                | 1.4                                             | 3.1E-05                                                   | 1.6                                             | 8.0E-07                                                | 1.8                                             | 6.3E-08                                                | 1.9                                             | 1.1E-08                                                 | 2.0                                              |
| 100 | CALR_HUMAN  | CALR                    | 4.6E-10                                       | 2.3E-01                                    | 6.2E-01                                                | 1.0                                             | 5.3E-01                                                   | 1.1                                             | 1.5E-01                                                | 1.1                                             | 9.7E-01                                                | 1.0                                             | 3.7E-01                                                 | 0.9                                              |
| 101 | CALU_HUMAN  | CALU                    | 5.6E-04                                       | 3.9E-10                                    | 2.0E-02                                                | 0.9                                             | 6.4E-02                                                   | 0.9                                             | 2.7E-01                                                | 1.1                                             | 1.1E-03                                                | 1.2                                             | 1.1E-07                                                 | 1.5                                              |
| 102 | CAND1_HUMAN | CAND1                   | 1.8E-05                                       | 4.4E-06                                    | 3.4E-03                                                | 1.5                                             | 1.4E-04                                                   | 1.8                                             | 2.6E-06                                                | 2.1                                             | 5.0E-06                                                | 2.0                                             | 6.3E-06                                                 | 2.0                                              |
| 103 | CANT1_HUMAN | CANT1                   | 6.7E-08                                       | 3.4E-04                                    | 9.3E-04                                                | 0.7                                             | 5.3E-04                                                   | 0.7                                             | 7.6E-03                                                | 0.8                                             | 4.8E-03                                                | 0.8                                             | 8.4E-06                                                 | 0.6                                              |
| 104 | CAP1_HUMAN  | CAP1                    | 3.8E-11                                       | 1.2E-05                                    | 1.2E-03                                                | 1.6                                             | 1.5E-04                                                   | 1.7                                             | 4.7E-06                                                | 1.9                                             | 7.6E-06                                                | 1.9                                             | 6.3E-06                                                 | 1.9                                              |
| 105 | CAPG_HUMAN  | CAPG                    | 2.0E-06                                       | 6.4E-34                                    | 2.4E-04                                                | 1.5                                             | 7.2E-17                                                   | 3.1                                             | 4.5E-23                                                | 4.1                                             | 5.5E-28                                                | 5.7                                             | 4.6E-29                                                 | 6.1                                              |

| No. | Uniprot ID  | Gene symbol      | <i>p</i> -value<br>(Subject)<br><sup>a)</sup> | <i>p</i> -value<br>(Time)<br><sup>b)</sup> | <i>p</i> -value<br>(1 mo vs.<br>0 mo)<br><sup>c)</sup> | Ratio<br>(1 mo<br>vs. 0<br>mo)<br><sup>d)</sup> | <i>p</i> -value<br>(3 mo<br>vs. 0<br>mo)<br><sup>c)</sup> | Ratio<br>(3 mo<br>vs. 0<br>mo)<br><sup>d)</sup> | <i>p</i> -value<br>(6 mo vs.<br>0 mo)<br><sup>c)</sup> | Ratio<br>(6 mo<br>vs. 0<br>mo)<br><sup>d)</sup> | <i>p</i> -value<br>(9 mo vs.<br>0 mo)<br><sup>c)</sup> | Ratio<br>(9 mo<br>vs. 0<br>mo)<br><sup>d)</sup> | <i>p</i> -value<br>(12 mo vs.<br>0 mo)<br><sup>c)</sup> | Ratio<br>(12 mo<br>vs. 0<br>mo)<br><sup>d)</sup> |
|-----|-------------|------------------|-----------------------------------------------|--------------------------------------------|--------------------------------------------------------|-------------------------------------------------|-----------------------------------------------------------|-------------------------------------------------|--------------------------------------------------------|-------------------------------------------------|--------------------------------------------------------|-------------------------------------------------|---------------------------------------------------------|--------------------------------------------------|
| 106 | CAPZB_HUMAN | CAPZB            | 8.0E-05                                       | 1.3E-04                                    | 1.6E-01                                                | 1.2                                             | 2.2E-03                                                   | 1.6                                             | 1.7E-05                                                | 2.0                                             | 3.5E-03                                                | 1.5                                             | 1.7E-04                                                 | 1.8                                              |
| 107 | CASA1_HUMAN | CSN1S1           | 3.6E-06                                       | 7.4E-27                                    | 3.1E-18                                                | 0.5                                             | 3.8E-22                                                   | 0.4                                             | 7.7E-26                                                | 0.4                                             | 4.7E-23                                                | 0.4                                             | 2.8E-15                                                 | 0.5                                              |
| 108 | CASB_HUMAN  | CSN2             | 6.9E-12                                       | 5.6E-01                                    | 8.0E-01                                                | 1.0                                             | 3.9E-01                                                   | 1.1                                             | 1.4E-01                                                | 1.1                                             | 7.0E-01                                                | 1.0                                             | 7.8E-01                                                 | 1.0                                              |
| 109 | CASK_HUMAN  | CSN3             | 1.8E-05                                       | 7.9E-21                                    | 3.6E-12                                                | 0.5                                             | 2.7E-16                                                   | 0.4                                             | 1.3E-20                                                | 0.3                                             | 9.6E-17                                                | 0.4                                             | 6.4E-08                                                 | 0.6                                              |
| 110 | CATA_HUMAN  | CAT              | 5.6E-01                                       | 2.9E-04                                    | 9.2E-02                                                | 1.2                                             | 4.4E-02                                                   | 1.2                                             | 2.8E-04                                                | 1.4                                             | 2.5E-05                                                | 1.5                                             | 1.7E-03                                                 | 1.4                                              |
| 111 | CATB_HUMAN  | CTSB             | 4.3E-14                                       | 3.8E-02                                    | 2.4E-01                                                | 0.9                                             | 7.5E-01                                                   | 1.0                                             | 4.6E-01                                                | 1.1                                             | 3.8E-02                                                | 1.2                                             | 1.2E-01                                                 | 1.2                                              |
| 112 | CATC_HUMAN  | CTSC             | 1.3E-12                                       | 1.3E-22                                    | 3.3E-05                                                | 0.7                                             | 3.9E-12                                                   | 0.5                                             | 5.4E-17                                                | 0.4                                             | 7.5E-20                                                | 0.4                                             | 7.1E-20                                                 | 0.4                                              |
| 113 | CATD_HUMAN  | CTSD             | 2.5E-18                                       | 1.2E-09                                    | 7.5E-01                                                | 1.0                                             | 1.1E-02                                                   | 1.3                                             | 9.3E-06                                                | 1.5                                             | 7.8E-08                                                | 1.7                                             | 8.9E-07                                                 | 1.6                                              |
| 114 | CATS_HUMAN  | CTSS             | 1.6E-10                                       | 9.6E-27                                    | 9.5E-05                                                | 1.2                                             | 5.3E-15                                                   | 1.6                                             | 3.5E-20                                                | 1.9                                             | 1.6E-20                                                | 1.9                                             | 2.6E-23                                                 | 2.0                                              |
| 115 | CATZ_HUMAN  | CTSZ             | 4.3E-06                                       | 1.8E-01                                    | 8.1E-01                                                | 1.0                                             | 6.1E-01                                                   | 1.0                                             | 3.2E-01                                                | 1.1                                             | 1.4E-01                                                | 0.9                                             | 4.2E-01                                                 | 0.9                                              |
| 116 | CAZA1_HUMAN | CAPZA1           | 1.0E-06                                       | 1.1E-07                                    | 6.0E-02                                                | 1.3                                             | 2.8E-05                                                   | 1.7                                             | 3.8E-05                                                | 1.7                                             | 4.0E-08                                                | 2.1                                             | 7.4E-07                                                 | 1.9                                              |
| 117 | CAZA2_HUMAN | CAPZA2           | 2.6E-04                                       | 1.6E-06                                    | 7.7E-02                                                | 1.3                                             | 1.7E-04                                                   | 1.7                                             | 2.5E-05                                                | 1.8                                             | 1.1E-06                                                | 2.0                                             | 3.7E-06                                                 | 1.9                                              |
| 118 | CBG_HUMAN   | SERPINA6         | 1.7E-08                                       | 3.4E-05                                    | 4.1E-05                                                | 0.8                                             | 4.2E-04                                                   | 0.8                                             | 1.1E-04                                                | 0.8                                             | 4.5E-03                                                | 0.8                                             | 2.1E-06                                                 | 0.7                                              |
| 119 | CBR1_HUMAN  | CBR1             | 9.9E-05                                       | 4.3E-03                                    | 2.4E-02                                                | 1.5                                             | 6.1E-04                                                   | 2.0                                             | 4.2E-03                                                | 1.7                                             | 2.0E-03                                                | 1.9                                             | 2.7E-01                                                 | 1.2                                              |
| 120 | CD14_HUMAN  | CD14             | 5.7E-11                                       | 1.0E-02                                    | 1.8E-01                                                | 0.9                                             | 1.9E-01                                                   | 0.9                                             | 8.8E-01                                                | 1.0                                             | 8.9E-01                                                | 1.0                                             | 3.7E-02                                                 | 1.1                                              |
| 121 | CD36_HUMAN  | CD36             | 1.6E-21                                       | 8.3E-10                                    | 9.2E-05                                                | 0.7                                             | 1.2E-10                                                   | 0.6                                             | 2.9E-08                                                | 0.6                                             | 2.2E-08                                                | 0.6                                             | 1.1E-04                                                 | 0.7                                              |
| 122 | CD59_HUMAN  | CD59             | 1.2E-07                                       | 5.7E-01                                    | 3.9E-01                                                | 0.9                                             | 7.4E-02                                                   | 0.9                                             | 3.5E-01                                                | 0.9                                             | 6.3E-01                                                | 1.0                                             | 7.1E-01                                                 | 1.0                                              |
| 123 | CD81_HUMAN  | CD81             | 3.6E-06                                       | 7.5E-05                                    | 1.8E-01                                                | 1.1                                             | 9.9E-03                                                   | 0.8                                             | 8.3E-03                                                | 0.8                                             | 2.1E-03                                                | 0.8                                             | 2.4E-01                                                 | 0.9                                              |
| 124 | CD9_HUMAN   | CD9              | 4.1E-10                                       | 1.9E-08                                    | 2.3E-03                                                | 0.8                                             | 2.0E-07                                                   | 0.7                                             | 2.2E-04                                                | 0.8                                             | 4.4E-02                                                | 0.9                                             | 5.2E-01                                                 | 1.0                                              |
| 125 | CDC42_HUMAN | CDC42P2<br>CDC42 | 6.1E-09                                       | 2.4E-02                                    | 1.1E-01                                                | 1.1                                             | 2.5E-02                                                   | 1.2                                             | 9.7E-04                                                | 1.3                                             | 3.1E-02                                                | 1.2                                             | 7.7E-03                                                 | 1.2                                              |
| 126 | CEL_HUMAN   | CEL              | 6.8E-08                                       | 6.8E-14                                    | 4.5E-02                                                | 1.1                                             | 6.2E-01                                                   | 1.0                                             | 6.7E-02                                                | 0.9                                             | 6.8E-06                                                | 0.8                                             | 3.5E-09                                                 | 0.7                                              |
| 127 | CERU_HUMAN  | CP               | 9.6E-10                                       | 2.2E-31                                    | 1.2E-04                                                | 0.8                                             | 5.5E-21                                                   | 0.6                                             | 1.1E-20                                                | 0.6                                             | 2.7E-25                                                | 0.5                                             | 3.3E-26                                                 | 0.5                                              |
| 128 | CF015_HUMAN | C6ORF15          | 3.7E-09                                       | 4.2E-06                                    | 3.8E-01                                                | 1.1                                             | 2.9E-05                                                   | 1.9                                             | 5.6E-06                                                | 2.0                                             | 4.3E-03                                                | 1.5                                             | 8.0E-05                                                 | 1.8                                              |
| 129 | CFAB_HUMAN  | CFB              | 2.9E-07                                       | 1.6E-09                                    | 7.2E-03                                                | 0.8                                             | 1.8E-04                                                   | 0.7                                             | 5.1E-10                                                | 0.6                                             | 3.3E-08                                                | 0.6                                             | 6.2E-07                                                 | 0.7                                              |
| 130 | CFAH_HUMAN  | CFH              | 5.3E-06                                       | 5.0E-14                                    | 1.8E-01                                                | 1.1                                             | 1.4E-01                                                   | 0.9                                             | 2.4E-04                                                | 0.8                                             | 1.1E-08                                                | 0.7                                             | 6.6E-09                                                 | 0.7                                              |
| 131 | CFAI_HUMAN  | CFI              | 1.5E-11                                       | 5.6E-14                                    | 5.6E-02                                                | 0.9                                             | 9.8E-05                                                   | 0.7                                             | 2.2E-09                                                | 0.6                                             | 1.6E-12                                                | 0.5                                             | 1.8E-10                                                 | 0.6                                              |
| 132 | CH3L1_HUMAN | CHI3L1           | 9.2E-17                                       | 3.0E-18                                    | 3.1E-08                                                | 0.4                                             | 3.5E-14                                                   | 0.2                                             | 5.5E-18                                                | 0.2                                             | 4.8E-15                                                | 0.2                                             | 3.6E-13                                                 | 0.3                                              |
| 133 | CH3L2_HUMAN | CHI3L2           | 7.7E-02                                       | 5.2E-03                                    | 5.8E-02                                                | 0.8                                             | 6.1E-03                                                   | 0.8                                             | 9.3E-04                                                | 0.7                                             | 3.4E-03                                                | 0.7                                             | 1.0E-03                                                 | 0.7                                              |
| 134 | CIB1_HUMAN  | CIB1             | 8.6E-01                                       | 3.4E-02                                    | 6.0E-03                                                | 0.9                                             | 5.4E-03                                                   | 0.9                                             | 1.2E-02                                                | 0.9                                             | 1.6E-02                                                | 0.9                                             | 8.6E-02                                                 | 0.9                                              |
| 135 | CLIC1_HUMAN | CLIC1            | 5.1E-13                                       | 1.2E-03                                    | 2.1E-02                                                | 1.3                                             | 2.5E-03                                                   | 1.5                                             | 5.4E-04                                                | 1.5                                             | 2.7E-04                                                | 1.6                                             | 1.5E-04                                                 | 1.6                                              |
| 136 | CLUS_HUMAN  | CLU              | 1.4E-13                                       | 3.8E-06                                    | 4.9E-02                                                | 0.8                                             | 7.2E-04                                                   | 0.7                                             | 1.8E-07                                                | 0.5                                             | 2.5E-05                                                | 0.6                                             | 1.0E-02                                                 | 0.7                                              |
| 137 | CMBL_HUMAN  | CMBL             | 3.8E-02                                       | 1.0E-03                                    | 2.8E-02                                                | 1.3                                             | 5.5E-04                                                   | 1.6                                             | 8.1E-05                                                | 1.7                                             | 2.6E-03                                                | 1.5                                             | 1.3E-03                                                 | 1.5                                              |
| 138 | CNDP2_HUMAN | CNDP2            | 1.1E-12                                       | 1.2E-08                                    | 3.6E-08                                                | 2.1                                             | 1.3E-08                                                   | 2.2                                             | 8.8E-08                                                | 2.0                                             | 1.1E-04                                                | 1.7                                             | 1.6E-03                                                 | 1.5                                              |
| 139 | CO2_HUMAN   | C2               | 2.2E-01                                       | 2.7E-10                                    | 4.0E-01                                                | 0.9                                             | 7.5E-03                                                   | 0.8                                             | 1.9E-05                                                | 0.8                                             | 5.3E-09                                                | 0.6                                             | 4.1E-09                                                 | 0.6                                              |
| 140 | CO3_HUMAN   | C3               | 4.0E-10                                       | 8.3E-11                                    | 2.9E-10                                                | 0.5                                             | 5.2E-09                                                   | 0.6                                             | 6.0E-11                                                | 0.5                                             | 1.8E-07                                                | 0.6                                             | 9.3E-06                                                 | 0.7                                              |
| 141 | CO4A_HUMAN  | C4A              | 6.2E-04                                       | 6.3E-01                                    | 7.7E-01                                                | 1.0                                             | 3.9E-01                                                   | 0.9                                             | 1.0E-01                                                | 0.8                                             | 4.0E-01                                                | 0.9                                             | 8.1E-01                                                 | 1.0                                              |

| No. | Uniprot ID  | Gene symbol                                 | <i>p</i> -value<br>(Subject)<br><sup>a)</sup> | <i>p</i> -value<br>(Time)<br>(Time)<br><sup>b)</sup> | <i>p</i> -value<br>(1 mo vs.<br>0 mo)<br><sup>c)</sup> | Ratio<br>(1 mo<br>vs. 0<br>mo)<br><sup>d)</sup> | <i>p</i> -value<br>(3 mo<br>vs. 0<br>mo)<br><sup>c)</sup> | Ratio<br>(3 mo<br>vs. 0<br>mo)<br><sup>d)</sup> | <i>p</i> -value<br>(6 mo vs.<br>0 mo)<br><sup>c)</sup> | Ratio<br>(6 mo<br>vs. 0<br>mo)<br><sup>d)</sup> | <i>p</i> -value<br>(9 mo vs.<br>0 mo)<br><sup>c)</sup> | Ratio<br>(9 mo<br>vs. 0<br>mo)<br><sup>d)</sup> | <i>p</i> -value<br>(12 mo vs.<br>0 mo)<br><sup>c)</sup> | Ratio<br>(12 mo<br>vs. 0<br>mo)<br><sup>d)</sup> |
|-----|-------------|---------------------------------------------|-----------------------------------------------|------------------------------------------------------|--------------------------------------------------------|-------------------------------------------------|-----------------------------------------------------------|-------------------------------------------------|--------------------------------------------------------|-------------------------------------------------|--------------------------------------------------------|-------------------------------------------------|---------------------------------------------------------|--------------------------------------------------|
| 142 | CO4B_HUMAN  | C4B                                         | 3.6E-12                                       | 2.1E-03                                              | 8.1E-02                                                | 0.7                                             | 3.2E-02                                                   | 0.6                                             | 4.1E-05                                                | 0.4                                             | 2.7E-02                                                | 0.6                                             | 3.0E-01                                                 | 0.8                                              |
| 143 | CO5_HUMAN   | C5                                          | 7.9E-04                                       | 1.9E-08                                              | 4.9E-02                                                | 0.9                                             | 9.8E-03                                                   | 0.8                                             | 9.5E-06                                                | 0.7                                             | 1.0E-08                                                | 0.7                                             | 2.6E-07                                                 | 0.7                                              |
| 144 | CO6_HUMAN   | C6                                          | 2.5E-01                                       | 7.0E-02                                              | 1.0E+00                                                | 1.0                                             | 6.1E-01                                                   | 1.0                                             | 9.2E-01                                                | 1.0                                             | 1.6E-01                                                | 0.9                                             | 2.4E-02                                                 | 0.9                                              |
| 145 | CO7_HUMAN   | C7                                          | 6.8E-15                                       | 6.7E-03                                              | 9.0E-01                                                | 1.0                                             | 5.7E-01                                                   | 1.0                                             | 5.0E-02                                                | 1.2                                             | 9.5E-03                                                | 1.2                                             | 7.7E-03                                                 | 1.2                                              |
| 146 | CO9_HUMAN   | C9                                          | 4.2E-05                                       | 1.3E-32                                              | 2.5E-10                                                | 0.7                                             | 2.6E-20                                                   | 0.5                                             | 1.6E-24                                                | 0.4                                             | 4.4E-30                                                | 0.4                                             | 9.9E-28                                                 | 0.4                                              |
| 147 | COF1_HUMAN  | CFL1                                        | 4.1E-11                                       | 1.1E-04                                              | 1.8E-02                                                | 1.3                                             | 1.3E-03                                                   | 1.5                                             | 3.3E-05                                                | 1.7                                             | 2.6E-05                                                | 1.7                                             | 1.0E-04                                                 | 1.6                                              |
| 148 | COMT_HUMAN  | COMT                                        | 8.0E-03                                       | 7.4E-02                                              | 4.3E-02                                                | 1.2                                             | 1.7E-01                                                   | 1.1                                             | 4.7E-03                                                | 1.3                                             | 5.5E-01                                                | 1.1                                             | 3.5E-01                                                 | 1.1                                              |
| 149 | COPD_HUMAN  | ARCNI                                       | 5.2E-01                                       | 2.0E-04                                              | 2.3E-02                                                | 1.2                                             | 2.8E-05                                                   | 1.5                                             | 4.0E-04                                                | 1.4                                             | 1.6E-04                                                | 1.4                                             | 6.3E-04                                                 | 1.4                                              |
| 150 | CRDL2_HUMAN | CHRD2                                       | 4.2E-13                                       | 7.0E-45                                              | 1.7E-08                                                | 0.7                                             | 3.5E-20                                                   | 0.5                                             | 5.2E-32                                                | 0.4                                             | 6.4E-35                                                | 0.3                                             | 1.0E-41                                                 | 0.3                                              |
| 151 | CSF1_HUMAN  | CSF1                                        | 9.3E-02                                       | 8.9E-08                                              | 2.1E-01                                                | 1.1                                             | 4.0E-01                                                   | 1.1                                             | 8.0E-03                                                | 0.8                                             | 5.3E-05                                                | 0.7                                             | 4.6E-05                                                 | 0.6                                              |
| 152 | CXCL2_HUMAN | CXCL2                                       | 1.2E-07                                       | 7.2E-05                                              | 9.7E-01                                                | 1.0                                             | 2.9E-01                                                   | 0.9                                             | 1.1E-01                                                | 0.8                                             | 4.8E-02                                                | 0.8                                             | 8.6E-06                                                 | 0.6                                              |
| 153 | CYTB_HUMAN  | CSTB                                        | 1.6E-11                                       | 1.1E-04                                              | 4.6E-04                                                | 3.2                                             | 9.5E-05                                                   | 3.7                                             | 5.0E-06                                                | 4.9                                             | 9.7E-04                                                | 3.0                                             | 4.8E-04                                                 | 3.2                                              |
| 154 | CYTC_HUMAN  | CST3                                        | 3.1E-10                                       | 1.7E-07                                              | 1.7E-01                                                | 1.1                                             | 7.9E-01                                                   | 1.0                                             | 3.1E-01                                                | 0.9                                             | 4.2E-04                                                | 0.8                                             | 6.1E-05                                                 | 0.8                                              |
| 155 | DAG1_HUMAN  | DAG1                                        | 3.2E-05                                       | 7.1E-03                                              | 2.3E-01                                                | 1.1                                             | 2.3E-01                                                   | 1.1                                             | 4.4E-02                                                | 1.1                                             | 3.0E-03                                                | 1.2                                             | 6.5E-04                                                 | 1.2                                              |
| 156 | DCXR_HUMAN  | DCXR                                        | 4.3E-11                                       | 3.5E-13                                              | 2.4E-05                                                | 2.0                                             | 1.1E-10                                                   | 3.0                                             | 6.5E-13                                                | 3.5                                             | 3.8E-11                                                | 3.1                                             | 1.2E-09                                                 | 2.8                                              |
| 157 | DDAH1_HUMAN | DDAH1                                       | 9.1E-10                                       | 1.6E-15                                              | 9.7E-08                                                | 1.8                                             | 4.4E-13                                                   | 2.4                                             | 3.8E-14                                                | 2.5                                             | 1.4E-13                                                | 2.5                                             | 1.3E-12                                                 | 2.3                                              |
| 158 | DDR1_HUMAN  | DDR1                                        | 8.9E-08                                       | 2.3E-03                                              | 5.0E-02                                                | 1.1                                             | 4.4E-01                                                   | 1.0                                             | 8.5E-01                                                | 1.0                                             | 5.5E-01                                                | 1.0                                             | 2.6E-02                                                 | 0.9                                              |
| 159 | DEST_HUMAN  | DSTN                                        | 8.3E-04                                       | 3.4E-05                                              | 1.3E-01                                                | 1.2                                             | 5.6E-04                                                   | 1.6                                             | 5.8E-05                                                | 1.7                                             | 9.1E-05                                                | 1.7                                             | 5.9E-05                                                 | 1.7                                              |
| 160 | DHAK_HUMAN  | DAK                                         | 9.1E-02                                       | 2.0E-06                                              | 1.9E-02                                                | 1.5                                             | 3.5E-05                                                   | 2.0                                             | 5.0E-06                                                | 2.2                                             | 9.8E-06                                                | 2.1                                             | 9.9E-07                                                 | 2.4                                              |
| 161 | DHPR_HUMAN  | QDPR                                        | 2.7E-02                                       | 5.1E-02                                              | 3.7E-02                                                | 1.2                                             | 3.6E-03                                                   | 1.2                                             | 1.0E-02                                                | 1.2                                             | 7.8E-02                                                | 1.1                                             | 2.9E-02                                                 | 1.2                                              |
| 162 | DIAC_HUMAN  | CTBS                                        | 7.1E-09                                       | 7.1E-01                                              | 2.2E-01                                                | 1.3                                             | 1.4E-01                                                   | 1.3                                             | 2.2E-01                                                | 1.3                                             | 3.1E-01                                                | 1.2                                             | 1.8E-01                                                 | 1.3                                              |
| 163 | DPP2_HUMAN  | DPP7                                        | 2.8E-06                                       | 7.5E-03                                              | 3.4E-02                                                | 1.6                                             | 1.6E-03                                                   | 2.0                                             | 1.9E-03                                                | 2.0                                             | 1.9E-03                                                | 2.0                                             | 1.6E-03                                                 | 2.0                                              |
| 164 | DPP3_HUMAN  | DPP3                                        | 4.0E-05                                       | 2.5E-04                                              | 1.6E-02                                                | 1.4                                             | 7.9E-04                                                   | 1.6                                             | 3.3E-05                                                | 1.9                                             | 2.1E-03                                                | 1.6                                             | 9.5E-05                                                 | 1.8                                              |
| 165 | DPYL2_HUMAN | DPYSL2                                      | 1.8E-09                                       | 1.1E-06                                              | 1.1E-04                                                | 1.7                                             | 4.0E-06                                                   | 1.9                                             | 6.2E-08                                                | 2.1                                             | 4.8E-06                                                | 1.9                                             | 2.3E-05                                                 | 1.8                                              |
| 166 | DPYL3_HUMAN | DPYSL3                                      | 2.3E-10                                       | 4.3E-01                                              | 7.6E-01                                                | 1.0                                             | 9.5E-01                                                   | 1.0                                             | 6.2E-01                                                | 1.1                                             | 4.9E-01                                                | 0.9                                             | 1.7E-01                                                 | 0.8                                              |
| 167 | DSC2_HUMAN  | DSC2                                        | 3.1E-04                                       | 5.8E-13                                              | 2.7E-04                                                | 0.8                                             | 7.6E-07                                                   | 0.7                                             | 1.6E-09                                                | 0.6                                             | 2.1E-13                                                | 0.5                                             | 1.4E-10                                                 | 0.6                                              |
| 168 | DYHC1_HUMAN | DYNC1H1                                     | 2.4E-01                                       | 2.9E-01                                              | 8.4E-02                                                | 1.2                                             | 9.7E-02                                                   | 1.2                                             | 3.5E-01                                                | 1.1                                             | 3.0E-02                                                | 1.2                                             | 1.1E-01                                                 | 1.2                                              |
| 169 | EF1A1_HUMAN | EEF1A1<br>EEF1A1P24<br>EEF1A1P5<br>EEF1A1P9 | 1.1E-11                                       | 6.5E-05                                              | 2.4E-02                                                | 1.4                                             | 9.4E-04                                                   | 1.7                                             | 2.7E-05                                                | 2.0                                             | 5.4E-05                                                | 2.0                                             | 2.6E-05                                                 | 2.0                                              |
| 170 | EF1B_HUMAN  | EEF1B2                                      | 1.7E-04                                       | 5.8E-06                                              | 2.5E-02                                                | 1.5                                             | 2.2E-04                                                   | 2.1                                             | 1.3E-05                                                | 2.4                                             | 8.7E-06                                                | 2.4                                             | 2.9E-06                                                 | 2.6                                              |
| 171 | EF1D_HUMAN  | EEF1D                                       | 6.8E-10                                       | 2.7E-08                                              | 3.6E-02                                                | 1.4                                             | 1.2E-04                                                   | 1.8                                             | 1.3E-05                                                | 2.0                                             | 4.3E-08                                                | 2.5                                             | 4.9E-08                                                 | 2.5                                              |
| 172 | EF1G_HUMAN  | EEF1G                                       | 3.4E-05                                       | 3.0E-04                                              | 1.4E-01                                                | 1.3                                             | 7.9E-02                                                   | 1.3                                             | 7.7E-04                                                | 1.7                                             | 1.5E-03                                                | 1.7                                             | 2.4E-05                                                 | 2.0                                              |
| 173 | EF2_HUMAN   | EEF2                                        | 8.8E-11                                       | 2.0E-04                                              | 1.6E-02                                                | 1.5                                             | 3.5E-04                                                   | 1.8                                             | 3.3E-05                                                | 2.0                                             | 7.7E-05                                                | 1.9                                             | 2.7E-04                                                 | 1.8                                              |
| 174 | EFHD1_HUMAN | EFHD1                                       | 3.9E-07                                       | 3.0E-04                                              | 6.3E-03                                                | 1.5                                             | 3.8E-03                                                   | 1.6                                             | 2.7E-04                                                | 1.8                                             | 6.6E-06                                                | 2.0                                             | 2.4E-03                                                 | 1.6                                              |
| 175 | EGF_HUMAN   | EGF                                         | 4.2E-05                                       | 5.9E-06                                              | 4.4E-01                                                | 1.0                                             | 5.4E-03                                                   | 0.9                                             | 3.4E-03                                                | 0.9                                             | 1.7E-06                                                | 0.8                                             | 1.2E-04                                                 | 0.8                                              |

| No. | Uniprot ID  | Gene symbol      | <i>p</i> -value<br>(Subject)<br><sup>a)</sup> | <i>p</i> -value<br>(Time)<br><sup>b)</sup> | <i>p</i> -value<br>(1 mo vs.<br>0 mo)<br><sup>c)</sup> | Ratio<br>(1 mo<br>vs. 0<br>mo)<br><sup>d)</sup> | <i>p</i> -value<br>(3 mo<br>vs. 0<br>mo)<br><sup>c)</sup> | Ratio<br>(3 mo<br>vs. 0<br>mo)<br><sup>d)</sup> | <i>p</i> -value<br>(6 mo vs.<br>0 mo)<br><sup>c)</sup> | Ratio<br>(6 mo<br>vs. 0<br>mo)<br><sup>d)</sup> | <i>p</i> -value<br>(9 mo vs.<br>0 mo)<br><sup>c)</sup> | Ratio<br>(9 mo<br>vs. 0<br>mo)<br><sup>d)</sup> | <i>p</i> -value<br>(12 mo vs.<br>0 mo)<br><sup>c)</sup> | Ratio<br>(12 mo<br>vs. 0<br>mo)<br><sup>d)</sup> |
|-----|-------------|------------------|-----------------------------------------------|--------------------------------------------|--------------------------------------------------------|-------------------------------------------------|-----------------------------------------------------------|-------------------------------------------------|--------------------------------------------------------|-------------------------------------------------|--------------------------------------------------------|-------------------------------------------------|---------------------------------------------------------|--------------------------------------------------|
| 176 | EHD4_HUMAN  | EHD4             | 6.5E-02                                       | 7.2E-03                                    | 8.7E-02                                                | 1.3                                             | 3.3E-03                                                   | 1.5                                             | 3.5E-03                                                | 1.5                                             | 2.4E-03                                                | 1.6                                             | 1.9E-03                                                 | 1.6                                              |
| 177 | EMAL2_HUMAN | EML2             | 3.0E-01                                       | 1.3E-02                                    | 2.3E-02                                                | 1.3                                             | 1.9E-02                                                   | 1.3                                             | 2.0E-03                                                | 1.4                                             | 9.3E-04                                                | 1.5                                             | 2.5E-02                                                 | 1.3                                              |
| 178 | ENOA_HUMAN  | ENO1             | 3.0E-10                                       | 2.1E-03                                    | 6.1E-04                                                | 1.5                                             | 5.5E-04                                                   | 1.5                                             | 1.4E-03                                                | 1.4                                             | 3.1E-02                                                | 1.3                                             | 1.6E-01                                                 | 1.2                                              |
| 179 | ENPL_HUMAN  | HSP90B1          | 1.6E-12                                       | 5.0E-02                                    | 3.2E-01                                                | 1.1                                             | 3.5E-02                                                   | 1.2                                             | 1.2E-02                                                | 1.2                                             | 5.3E-01                                                | 1.1                                             | 9.8E-01                                                 | 1.0                                              |
| 180 | EPHA7_HUMAN | EPHA7            | 2.8E-04                                       | 1.8E-11                                    | 2.9E-01                                                | 0.9                                             | 4.2E-04                                                   | 0.7                                             | 2.9E-06                                                | 0.7                                             | 7.0E-10                                                | 0.6                                             | 3.0E-10                                                 | 0.6                                              |
| 181 | ERAP1_HUMAN | ERAP1            | 1.3E-14                                       | 2.9E-04                                    | 1.9E-01                                                | 0.9                                             | 8.5E-02                                                   | 0.9                                             | 4.2E-04                                                | 0.8                                             | 3.3E-05                                                | 0.7                                             | 3.1E-03                                                 | 0.8                                              |
| 182 | ERP29_HUMAN | ERP29            | 2.5E-10                                       | 1.4E-08                                    | 7.4E-04                                                | 1.7                                             | 1.8E-07                                                   | 2.5                                             | 1.5E-07                                                | 2.5                                             | 1.3E-08                                                | 2.7                                             | 6.0E-07                                                 | 2.3                                              |
| 183 | ESTD_HUMAN  | ESD              | 2.2E-01                                       | 4.0E-02                                    | 5.8E-01                                                | 1.1                                             | 3.7E-02                                                   | 1.2                                             | 3.3E-02                                                | 1.2                                             | 3.5E-03                                                | 1.3                                             | 1.2E-01                                                 | 1.2                                              |
| 184 | EZRI_HUMAN  | EZR              | 3.5E-12                                       | 4.6E-03                                    | 1.3E-03                                                | 1.4                                             | 9.0E-04                                                   | 1.5                                             | 4.2E-04                                                | 1.5                                             | 6.1E-03                                                | 1.4                                             | 7.0E-03                                                 | 1.4                                              |
| 185 | F10A1_HUMAN | ST13             | 2.7E-11                                       | 2.3E-05                                    | 3.0E-02                                                | 1.4                                             | 8.0E-04                                                   | 1.7                                             | 6.2E-05                                                | 1.9                                             | 1.6E-06                                                | 2.2                                             | 1.2E-04                                                 | 1.9                                              |
| 186 | F16P1_HUMAN | FBP1             | 1.2E-08                                       | 9.0E-06                                    | 4.9E-04                                                | 1.8                                             | 8.6E-06                                                   | 2.1                                             | 9.4E-07                                                | 2.3                                             | 1.6E-05                                                | 2.1                                             | 1.6E-04                                                 | 1.9                                              |
| 187 | F16P2_HUMAN | FBP2             | 7.6E-06                                       | 6.1E-05                                    | 6.4E-03                                                | 1.5                                             | 1.6E-03                                                   | 1.6                                             | 4.2E-06                                                | 2.1                                             | 5.1E-05                                                | 1.9                                             | 4.8E-02                                                 | 1.3                                              |
| 188 | FA12_HUMAN  | F12              | 7.1E-03                                       | 9.2E-07                                    | 4.0E-01                                                | 0.9                                             | 6.3E-01                                                   | 1.0                                             | 4.2E-02                                                | 0.9                                             | 3.6E-05                                                | 0.7                                             | 6.6E-07                                                 | 0.7                                              |
| 189 | FAAA_HUMAN  | FAH              | 1.4E-02                                       | 5.9E-08                                    | 4.3E-02                                                | 1.4                                             | 1.1E-03                                                   | 1.6                                             | 1.4E-05                                                | 2.1                                             | 3.3E-08                                                | 2.7                                             | 2.4E-07                                                 | 2.6                                              |
| 190 | FABP7_HUMAN | FABP7            | 1.9E-05                                       | 1.2E-08                                    | 1.4E-04                                                | 1.9                                             | 1.4E-09                                                   | 3.0                                             | 1.0E-07                                                | 2.5                                             | 3.7E-07                                                | 2.4                                             | 1.4E-05                                                 | 2.1                                              |
| 191 | FABPH_HUMAN | FABP3            | 1.2E-13                                       | 5.4E-17                                    | 2.0E-08                                                | 2.1                                             | 3.3E-14                                                   | 2.8                                             | 1.1E-15                                                | 3.1                                             | 5.7E-15                                                | 2.9                                             | 4.7E-13                                                 | 2.7                                              |
| 192 | FAM3B_HUMAN | FAM3B            | 9.9E-04                                       | 1.8E-02                                    | 3.4E-01                                                | 1.1                                             | 8.7E-03                                                   | 1.2                                             | 1.7E-03                                                | 1.2                                             | 3.1E-02                                                | 1.1                                             | 2.2E-01                                                 | 1.1                                              |
| 193 | FAM3C_HUMAN | FAM3C            | 1.8E-11                                       | 1.7E-02                                    | 2.5E-02                                                | 1.2                                             | 1.1E-02                                                   | 1.2                                             | 3.5E-02                                                | 1.2                                             | 5.7E-02                                                | 1.2                                             | 8.6E-01                                                 | 1.0                                              |
| 194 | FAS_HUMAN   | FASN             | 3.1E-10                                       | 3.7E-11                                    | 1.7E-05                                                | 2.2                                             | 6.0E-08                                                   | 2.7                                             | 9.7E-11                                                | 3.4                                             | 1.8E-10                                                | 3.3                                             | 8.5E-10                                                 | 3.2                                              |
| 195 | FAT2_HUMAN  | FAT2             | 1.1E-08                                       | 1.5E-06                                    | 5.7E-01                                                | 1.0                                             | 4.6E-01                                                   | 1.1                                             | 3.8E-02                                                | 1.2                                             | 4.4E-05                                                | 1.3                                             | 3.0E-06                                                 | 1.4                                              |
| 196 | FCGBP_HUMAN | FCGBP            | 1.5E-01                                       | 1.4E-02                                    | 5.9E-02                                                | 0.9                                             | 3.8E-03                                                   | 0.8                                             | 5.2E-03                                                | 0.8                                             | 6.4E-03                                                | 0.8                                             | 2.3E-03                                                 | 0.8                                              |
| 197 | FCL_HUMAN   | TSTA3            | 7.5E-10                                       | 1.3E-07                                    | 2.8E-05                                                | 1.9                                             | 5.7E-07                                                   | 2.1                                             | 3.7E-08                                                | 2.3                                             | 1.6E-06                                                | 2.1                                             | 5.3E-07                                                 | 2.2                                              |
| 198 | FETUA_HUMAN | AHSG             | 2.3E-11                                       | 4.4E-01                                    | 8.3E-01                                                | 1.0                                             | 8.7E-01                                                   | 1.0                                             | 5.1E-01                                                | 1.0                                             | 6.6E-01                                                | 1.0                                             | 1.9E-01                                                 | 0.9                                              |
| 199 | FIBA_HUMAN  | FGA              | 4.9E-19                                       | 6.5E-03                                    | 2.6E-03                                                | 0.7                                             | 2.8E-01                                                   | 0.9                                             | 3.8E-01                                                | 0.9                                             | 2.9E-03                                                | 0.7                                             | 8.5E-03                                                 | 0.7                                              |
| 200 | FIBB_HUMAN  | FGB              | 9.9E-12                                       | 8.4E-05                                    | 1.5E-04                                                | 0.5                                             | 4.3E-02                                                   | 0.7                                             | 1.4E-02                                                | 0.7                                             | 2.7E-06                                                | 0.4                                             | 3.0E-03                                                 | 0.6                                              |
| 201 | FIBG_HUMAN  | FGG              | 3.1E-14                                       | 1.5E-04                                    | 4.5E-05                                                | 0.5                                             | 1.3E-01                                                   | 0.8                                             | 8.3E-02                                                | 0.7                                             | 6.7E-05                                                | 0.5                                             | 3.5E-03                                                 | 0.6                                              |
| 202 | FINC_HUMAN  | FN1              | 5.0E-20                                       | 2.6E-10                                    | 2.6E-01                                                | 0.9                                             | 3.1E-03                                                   | 0.8                                             | 1.9E-05                                                | 0.7                                             | 3.6E-07                                                | 0.7                                             | 4.1E-10                                                 | 0.6                                              |
| 203 | FKBP4_HUMAN | FKBP4            | 2.1E-11                                       | 1.0E-03                                    | 2.7E-03                                                | 1.6                                             | 4.0E-04                                                   | 1.8                                             | 9.2E-05                                                | 1.9                                             | 5.0E-04                                                | 1.8                                             | 1.6E-03                                                 | 1.7                                              |
| 204 | FLNB_HUMAN  | FLNB             | 6.8E-14                                       | 2.7E-01                                    | 8.6E-01                                                | 1.0                                             | 1.5E-01                                                   | 1.2                                             | 3.9E-02                                                | 1.3                                             | 1.9E-01                                                | 1.2                                             | 5.3E-01                                                 | 1.1                                              |
| 205 | FOLR1_HUMAN | FOLR1            | 1.1E-17                                       | 7.9E-13                                    | 8.3E-06                                                | 1.3                                             | 6.6E-12                                                   | 1.5                                             | 5.7E-13                                                | 1.6                                             | 8.2E-10                                                | 1.5                                             | 4.5E-07                                                 | 1.3                                              |
| 206 | FPPS_HUMAN  | FDPS             | 4.2E-09                                       | 5.7E-06                                    | 1.1E-04                                                | 1.9                                             | 5.3E-07                                                   | 2.4                                             | 1.6E-06                                                | 2.3                                             | 4.3E-04                                                | 1.8                                             | 6.7E-04                                                 | 1.8                                              |
| 207 | FSTL1_HUMAN | FSTL1            | 1.8E-19                                       | 1.3E-14                                    | 3.7E-05                                                | 1.5                                             | 3.7E-08                                                   | 1.8                                             | 8.0E-06                                                | 1.6                                             | 5.1E-02                                                | 1.2                                             | 8.5E-03                                                 | 0.8                                              |
| 208 | FUCO_HUMAN  | FUCA1            | 6.7E-03                                       | 5.3E-38                                    | 2.8E-04                                                | 1.4                                             | 9.0E-16                                                   | 2.4                                             | 8.7E-27                                                | 3.8                                             | 4.0E-31                                                | 4.7                                             | 8.8E-32                                                 | 4.8                                              |
| 209 | FUT6_HUMAN  | FUT6             | 3.4E-01                                       | 6.2E-04                                    | 2.6E-02                                                | 0.9                                             | 1.3E-04                                                   | 0.8                                             | 3.9E-04                                                | 0.8                                             | 6.5E-04                                                | 0.8                                             | 8.3E-04                                                 | 0.8                                              |
| 210 | G3P_HUMAN   | GAPDH<br>GAPDHL6 | 5.9E-10                                       | 8.4E-06                                    | 6.5E-03                                                | 1.4                                             | 1.0E-03                                                   | 1.5                                             | 8.2E-06                                                | 1.8                                             | 7.9E-06                                                | 1.8                                             | 2.2E-06                                                 | 1.8                                              |
| 211 | G6PI_HUMAN  | GPI              | 6.0E-09                                       | 3.0E-02                                    | 2.4E-01                                                | 1.2                                             | 2.8E-02                                                   | 1.3                                             | 1.2E-01                                                | 1.2                                             | 2.2E-02                                                | 1.3                                             | 1.3E-03                                                 | 1.5                                              |

| No. | Uniprot ID  | Gene symbol                             | <i>p</i> -value<br>(Subject)<br><sup>a)</sup> | <i>p</i> -value<br>(Time)<br><sup>b)</sup> | <i>p</i> -value<br>(1 mo vs.<br>0 mo)<br><sup>c)</sup> | Ratio<br>(1 mo<br>vs. 0<br>mo)<br><sup>d)</sup> | <i>p</i> -value<br>(3 mo<br>vs. 0<br>mo)<br><sup>c)</sup> | Ratio<br>(3 mo<br>vs. 0<br>mo)<br><sup>d)</sup> | <i>p</i> -value<br>(6 mo vs.<br>0 mo)<br><sup>c)</sup> | Ratio<br>(6 mo<br>vs. 0<br>mo)<br><sup>d)</sup> | <i>p</i> -value<br>(9 mo vs.<br>0 mo)<br><sup>c)</sup> | Ratio<br>(9 mo<br>vs. 0<br>mo)<br><sup>d)</sup> | <i>p</i> -value<br>(12 mo vs.<br>0 mo)<br><sup>c)</sup> | Ratio<br>(12 mo<br>vs. 0<br>mo)<br><sup>d)</sup> |
|-----|-------------|-----------------------------------------|-----------------------------------------------|--------------------------------------------|--------------------------------------------------------|-------------------------------------------------|-----------------------------------------------------------|-------------------------------------------------|--------------------------------------------------------|-------------------------------------------------|--------------------------------------------------------|-------------------------------------------------|---------------------------------------------------------|--------------------------------------------------|
| 212 | GALE_HUMAN  | GALE                                    | 6.4E-05                                       | 5.0E-14                                    | 9.8E-03                                                | 1.6                                             | 4.0E-08                                                   | 2.9                                             | 7.8E-11                                                | 3.7                                             | 2.3E-12                                                | 4.3                                             | 2.1E-11                                                 | 4.0                                              |
| 213 | GALT2_HUMAN | GALNT2                                  | 2.6E-08                                       | 2.5E-14                                    | 5.2E-06                                                | 0.8                                             | 4.5E-09                                                   | 0.7                                             | 3.8E-11                                                | 0.7                                             | 1.1E-13                                                | 0.6                                             | 2.5E-13                                                 | 0.6                                              |
| 214 | GANAB_HUMAN | GANAB                                   | 5.8E-13                                       | 1.3E-10                                    | 2.5E-05                                                | 0.8                                             | 3.4E-09                                                   | 0.7                                             | 3.1E-12                                                | 0.6                                             | 1.5E-05                                                | 0.8                                             | 4.0E-06                                                 | 0.7                                              |
| 215 | GAPR1_HUMAN | GLIPR2                                  | 1.3E-05                                       | 8.3E-04                                    | 1.7E-05                                                | 1.5                                             | 3.7E-03                                                   | 1.3                                             | 8.3E-02                                                | 1.2                                             | 7.8E-02                                                | 1.2                                             | 1.3E-01                                                 | 1.1                                              |
| 216 | GBB1_HUMAN  | GNB1                                    | 3.0E-06                                       | 3.5E-02                                    | 6.4E-01                                                | 1.0                                             | 1.4E-01                                                   | 0.9                                             | 1.5E-01                                                | 0.9                                             | 2.7E-03                                                | 0.8                                             | 2.3E-02                                                 | 0.8                                              |
| 217 | GBB2_HUMAN  | GNB2                                    | 2.8E-07                                       | 2.5E-07                                    | 8.5E-01                                                | 1.0                                             | 1.5E-01                                                   | 0.9                                             | 2.7E-01                                                | 0.9                                             | 1.3E-05                                                | 0.7                                             | 2.1E-06                                                 | 0.7                                              |
| 218 | GBB4_HUMAN  | GNB4                                    | 5.3E-06                                       | 1.0E-01                                    | 9.6E-01                                                | 1.0                                             | 8.1E-01                                                   | 1.0                                             | 7.4E-01                                                | 1.0                                             | 1.5E-01                                                | 0.9                                             | 2.0E-02                                                 | 0.8                                              |
| 219 | GBG12_HUMAN | GNG12                                   | 7.4E-02                                       | 4.1E-01                                    | 2.9E-01                                                | 1.1                                             | 7.1E-01                                                   | 1.0                                             | 5.7E-01                                                | 1.0                                             | 4.0E-02                                                | 1.2                                             | 7.0E-01                                                 | 1.0                                              |
| 220 | GDIA_HUMAN  | GDI1                                    | 3.8E-06                                       | 1.3E-05                                    | 4.1E-02                                                | 1.2                                             | 1.1E-05                                                   | 1.5                                             | 7.5E-06                                                | 1.6                                             | 5.5E-03                                                | 1.3                                             | 2.3E-01                                                 | 1.1                                              |
| 221 | GDIB_HUMAN  | GDI2                                    | 1.3E-09                                       | 1.6E-04                                    | 7.5E-02                                                | 1.2                                             | 1.2E-04                                                   | 1.4                                             | 1.6E-05                                                | 1.5                                             | 4.2E-02                                                | 1.2                                             | 8.2E-02                                                 | 1.2                                              |
| 222 | GDIR1_HUMAN | ARHGDI A                                | 7.8E-13                                       | 5.2E-11                                    | 4.3E-04                                                | 1.5                                             | 7.9E-09                                                   | 2.0                                             | 7.0E-09                                                | 2.0                                             | 5.7E-10                                                | 2.1                                             | 6.3E-10                                                 | 2.1                                              |
| 223 | GELS_HUMAN  | GSN                                     | 2.2E-15                                       | 4.8E-44                                    | 3.6E-09                                                | 1.3                                             | 6.9E-24                                                   | 1.8                                             | 2.0E-32                                                | 2.2                                             | 3.1E-36                                                | 2.4                                             | 6.9E-40                                                 | 2.6                                              |
| 224 | GFPT1_HUMAN | GFPT1                                   | 1.1E-09                                       | 1.1E-09                                    | 1.8E-04                                                | 1.9                                             | 5.0E-08                                                   | 2.7                                             | 5.5E-09                                                | 2.9                                             | 3.0E-09                                                | 3.0                                             | 4.3E-08                                                 | 2.7                                              |
| 225 | GGT1_HUMAN  | GGT4P<br>GGTLC3<br>GGTLCSP<br>GGT1 GGT2 | 1.1E-20                                       | 0.0E+00                                    | 1.1E-12                                                | 0.6                                             | 7.2E-34                                                   | 0.3                                             | 4.6E-40                                                | 0.2                                             | 2.7E-40                                                | 0.2                                             | 3.4E-40                                                 | 0.2                                              |
| 226 | GLCM_HUMAN  | GBA                                     | 6.6E-03                                       | 9.4E-12                                    | 4.3E-02                                                | 0.9                                             | 5.8E-04                                                   | 0.8                                             | 1.5E-04                                                | 0.8                                             | 3.8E-09                                                | 0.6                                             | 2.5E-12                                                 | 0.6                                              |
| 227 | GLOD4_HUMAN | GLOD4                                   | 2.5E-03                                       | 4.0E-06                                    | 2.0E-01                                                | 1.2                                             | 4.5E-04                                                   | 1.6                                             | 6.3E-05                                                | 1.8                                             | 4.3E-06                                                | 1.9                                             | 1.4E-05                                                 | 1.9                                              |
| 228 | GLRX1_HUMAN | GLRX                                    | 5.0E-07                                       | 7.5E-12                                    | 2.3E-04                                                | 1.6                                             | 9.7E-09                                                   | 2.3                                             | 4.3E-10                                                | 2.5                                             | 6.7E-12                                                | 2.8                                             | 5.0E-09                                                 | 2.3                                              |
| 229 | GLRX3_HUMAN | GLRX3                                   | 1.8E-01                                       | 4.2E-02                                    | 7.7E-02                                                | 1.2                                             | 1.6E-02                                                   | 1.3                                             | 8.3E-03                                                | 1.4                                             | 2.1E-02                                                | 1.3                                             | 4.5E-03                                                 | 1.4                                              |
| 230 | GLU2B_HUMAN | PRKCSH                                  | 4.3E-07                                       | 3.9E-05                                    | 5.0E-01                                                | 1.0                                             | 1.1E-01                                                   | 1.1                                             | 5.5E-02                                                | 1.1                                             | 2.4E-04                                                | 1.3                                             | 5.3E-04                                                 | 1.2                                              |
| 231 | GLYC_HUMAN  | SHMT1                                   | 9.2E-06                                       | 7.0E-12                                    | 3.4E-05                                                | 2.0                                             | 5.7E-09                                                   | 2.9                                             | 4.2E-12                                                | 3.7                                             | 3.7E-10                                                | 3.2                                             | 3.1E-09                                                 | 3.0                                              |
| 232 | GMDS_HUMAN  | GMDS                                    | 3.2E-08                                       | 3.0E-09                                    | 3.8E-05                                                | 2.0                                             | 4.8E-08                                                   | 2.6                                             | 8.0E-10                                                | 3.0                                             | 1.2E-08                                                | 2.8                                             | 3.6E-06                                                 | 2.2                                              |
| 233 | GMPPA_HUMAN | GMPPA                                   | 2.3E-06                                       | 8.9E-04                                    | 3.2E-02                                                | 1.6                                             | 1.0E-04                                                   | 2.4                                             | 2.1E-04                                                | 2.3                                             | 8.0E-03                                                | 1.8                                             | 3.5E-03                                                 | 1.9                                              |
| 234 | GMPPB_HUMAN | GMPPB                                   | 5.4E-04                                       | 1.7E-04                                    | 3.2E-02                                                | 1.5                                             | 3.4E-04                                                   | 2.1                                             | 1.1E-05                                                | 2.5                                             | 1.5E-03                                                | 1.9                                             | 5.0E-04                                                 | 2.1                                              |
| 235 | GNAQ_HUMAN  | GNAQ                                    | 8.7E-07                                       | 2.3E-01                                    | 6.9E-01                                                | 1.1                                             | 2.9E-01                                                   | 1.1                                             | 2.0E-01                                                | 1.2                                             | 1.8E-02                                                | 1.4                                             | 6.0E-01                                                 | 1.1                                              |
| 236 | GNAS1_HUMAN | GNAS                                    | 4.7E-04                                       | 4.6E-01                                    | 6.0E-01                                                | 1.1                                             | 6.7E-01                                                   | 1.1                                             | 8.6E-01                                                | 1.0                                             | 8.8E-01                                                | 1.0                                             | 1.3E-01                                                 | 0.8                                              |
| 237 | GNPTG_HUMAN | GNPTG                                   | 9.3E-04                                       | 2.2E-01                                    | 5.9E-01                                                | 1.0                                             | 2.5E-01                                                   | 0.9                                             | 3.2E-02                                                | 0.9                                             | 5.2E-02                                                | 0.9                                             | 9.7E-02                                                 | 0.9                                              |
| 238 | GNS_HUMAN   | GNS                                     | 3.2E-01                                       | 1.8E-05                                    | 6.5E-02                                                | 1.3                                             | 1.1E-04                                                   | 1.7                                             | 2.2E-05                                                | 1.8                                             | 3.1E-05                                                | 1.7                                             | 5.5E-05                                                 | 1.7                                              |
| 239 | GOLM1_HUMAN | GOLM1                                   | 6.6E-07                                       | 3.0E-25                                    | 1.1E-01                                                | 0.9                                             | 1.0E-07                                                   | 0.7                                             | 2.5E-15                                                | 0.6                                             | 6.4E-18                                                | 0.5                                             | 7.5E-21                                                 | 0.5                                              |
| 240 | GP126_HUMAN | GPR126                                  | 5.4E-08                                       | 1.1E-11                                    | 2.1E-04                                                | 0.8                                             | 2.0E-11                                                   | 0.7                                             | 1.4E-11                                                | 0.7                                             | 7.8E-08                                                | 0.7                                             | 4.0E-06                                                 | 0.8                                              |
| 241 | GPC5B_HUMAN | GPRC5B                                  | 2.3E-02                                       | 2.0E-01                                    | 6.7E-02                                                | 0.9                                             | 1.2E-01                                                   | 0.9                                             | 4.6E-02                                                | 0.9                                             | 7.1E-01                                                | 1.0                                             | 7.6E-01                                                 | 1.0                                              |
| 242 | GPDA_HUMAN  | GPD1                                    | 3.2E-02                                       | 1.6E-03                                    | 2.5E-02                                                | 1.4                                             | 1.9E-03                                                   | 1.6                                             | 1.7E-04                                                | 1.7                                             | 4.2E-04                                                | 1.7                                             | 3.4E-03                                                 | 1.5                                              |
| 243 | GPR56_HUMAN | GPR56                                   | 7.9E-02                                       | 8.3E-02                                    | 1.8E-01                                                | 0.9                                             | 1.4E-02                                                   | 0.9                                             | 1.8E-02                                                | 0.9                                             | 1.8E-02                                                | 0.9                                             | 2.3E-01                                                 | 0.9                                              |
| 244 | GPX3_HUMAN  | GPX3                                    | 3.6E-08                                       | 9.8E-17                                    | 1.2E-07                                                | 1.5                                             | 1.2E-09                                                   | 1.6                                             | 1.4E-04                                                | 1.3                                             | 5.3E-01                                                | 1.0                                             | 1.7E-02                                                 | 0.8                                              |
| 245 | GPX4_HUMAN  | GPX4                                    | 2.1E-08                                       | 1.1E-04                                    | 6.4E-03                                                | 1.4                                             | 4.0E-06                                                   | 1.8                                             | 1.8E-04                                                | 1.6                                             | 8.6E-03                                                | 1.4                                             | 7.1E-02                                                 | 1.2                                              |

| No. | Uniprot ID  | Gene symbol          | <i>p</i> -value<br>(Subject)<br><sup>a)</sup> | <i>p</i> -value<br>(Time)<br><sup>b)</sup> | <i>p</i> -value<br>(1 mo vs.<br>0 mo)<br><sup>c)</sup> | Ratio<br>(1 mo<br>vs. 0<br>mo)<br><sup>d)</sup> | <i>p</i> -value<br>(3 mo<br>vs. 0<br>mo)<br><sup>c)</sup> | Ratio<br>(3 mo<br>vs. 0<br>mo)<br><sup>d)</sup> | <i>p</i> -value<br>(6 mo vs.<br>0 mo)<br><sup>c)</sup> | Ratio<br>(6 mo<br>vs. 0<br>mo)<br><sup>d)</sup> | <i>p</i> -value<br>(9 mo vs.<br>0 mo)<br><sup>c)</sup> | Ratio<br>(9 mo<br>vs. 0<br>mo)<br><sup>d)</sup> | <i>p</i> -value<br>(12 mo vs.<br>0 mo)<br><sup>c)</sup> | Ratio<br>(12 mo<br>vs. 0<br>mo)<br><sup>d)</sup> |
|-----|-------------|----------------------|-----------------------------------------------|--------------------------------------------|--------------------------------------------------------|-------------------------------------------------|-----------------------------------------------------------|-------------------------------------------------|--------------------------------------------------------|-------------------------------------------------|--------------------------------------------------------|-------------------------------------------------|---------------------------------------------------------|--------------------------------------------------|
| 246 | GRN_HUMAN   | GRN                  | 2.0E-14                                       | 9.8E-28                                    | 6.5E-10                                                | 1.9                                             | 5.8E-19                                                   | 2.7                                             | 2.2E-24                                                | 3.5                                             | 9.7E-24                                                | 3.4                                             | 5.4E-23                                                 | 3.3                                              |
| 247 | GRP78_HUMAN | HSPA5                | 2.9E-13                                       | 2.9E-02                                    | 5.5E-01                                                | 1.0                                             | 9.6E-02                                                   | 1.1                                             | 2.2E-02                                                | 1.1                                             | 1.0E-01                                                | 1.1                                             | 1.1E-01                                                 | 1.1                                              |
| 248 | GSHB_HUMAN  | GSS                  | 1.8E-08                                       | 4.9E-07                                    | 2.7E-03                                                | 1.6                                             | 6.8E-06                                                   | 2.0                                             | 2.0E-07                                                | 2.3                                             | 7.9E-07                                                | 2.2                                             | 3.2E-06                                                 | 2.1                                              |
| 249 | H2B1B_HUMAN | HIST1H2BB            | 1.6E-03                                       | 5.8E-02                                    | 2.2E-01                                                | 0.8                                             | 1.6E-02                                                   | 0.7                                             | 3.0E-02                                                | 0.7                                             | 3.1E-02                                                | 0.7                                             | 6.1E-03                                                 | 0.7                                              |
| 250 | H90B4_HUMAN | HSP90AB4P            | 6.7E-11                                       | 8.4E-05                                    | 6.8E-03                                                | 1.6                                             | 1.5E-04                                                   | 2.0                                             | 1.2E-05                                                | 2.3                                             | 2.4E-05                                                | 2.2                                             | 7.6E-04                                                 | 1.9                                              |
| 251 | HDHD2_HUMAN | HDHD2                | 4.8E-01                                       | 9.6E-02                                    | 2.5E-01                                                | 1.1                                             | 1.8E-02                                                   | 1.2                                             | 2.9E-02                                                | 1.2                                             | 1.2E-02                                                | 1.3                                             | 1.1E-01                                                 | 1.2                                              |
| 252 | HEBP1_HUMAN | HEBP1                | 1.6E-05                                       | 4.1E-11                                    | 1.1E-06                                                | 1.9                                             | 1.4E-09                                                   | 2.3                                             | 1.3E-11                                                | 2.6                                             | 5.0E-09                                                | 2.2                                             | 1.7E-07                                                 | 2.0                                              |
| 253 | HEBP2_HUMAN | HEBP2                | 2.8E-04                                       | 1.7E-04                                    | 9.5E-02                                                | 1.3                                             | 2.3E-04                                                   | 1.7                                             | 3.0E-04                                                | 1.7                                             | 5.4E-04                                                | 1.7                                             | 5.2E-05                                                 | 1.8                                              |
| 254 | HEM2_HUMAN  | ALAD                 | 4.1E-03                                       | 7.7E-03                                    | 1.7E-02                                                | 1.4                                             | 1.9E-03                                                   | 1.5                                             | 3.0E-03                                                | 1.5                                             | 1.6E-03                                                | 1.5                                             | 1.8E-03                                                 | 1.5                                              |
| 255 | HEMO_HUMAN  | HPX                  | 9.8E-18                                       | 2.2E-04                                    | 4.7E-02                                                | 1.1                                             | 1.6E-01                                                   | 0.9                                             | 3.1E-02                                                | 0.9                                             | 1.5E-01                                                | 1.1                                             | 4.8E-01                                                 | 1.0                                              |
| 256 | HEP2_HUMAN  | SERPIND1             | 8.7E-05                                       | 1.1E-08                                    | 2.1E-02                                                | 1.1                                             | 5.6E-01                                                   | 1.0                                             | 1.1E-01                                                | 0.9                                             | 1.6E-02                                                | 0.9                                             | 9.0E-06                                                 | 0.8                                              |
| 257 | HEXA_HUMAN  | HEXA                 | 8.7E-06                                       | 5.1E-01                                    | 2.6E-01                                                | 1.1                                             | 2.7E-01                                                   | 1.1                                             | 6.3E-02                                                | 1.1                                             | 1.3E-01                                                | 1.1                                             | 1.6E-01                                                 | 1.1                                              |
| 258 | HEXB_HUMAN  | HEXB                 | 2.2E-21                                       | 4.3E-13                                    | 1.5E-02                                                | 1.2                                             | 1.3E-09                                                   | 1.5                                             | 4.4E-11                                                | 1.6                                             | 3.1E-10                                                | 1.6                                             | 1.1E-09                                                 | 1.5                                              |
| 259 | HNRPK_HUMAN | HNRNPK               | 5.0E-02                                       | 7.2E-02                                    | 6.1E-01                                                | 1.0                                             | 1.4E-01                                                   | 1.1                                             | 1.1E-01                                                | 1.2                                             | 4.0E-02                                                | 1.2                                             | 5.4E-03                                                 | 1.3                                              |
| 260 | HNRPQ_HUMAN | SYNCRIP              | 3.4E-08                                       | 6.5E-05                                    | 5.4E-01                                                | 1.1                                             | 4.7E-03                                                   | 1.6                                             | 1.4E-02                                                | 1.5                                             | 1.3E-05                                                | 2.2                                             | 2.8E-04                                                 | 1.9                                              |
| 261 | HPLN3_HUMAN | HAPLN3               | 1.5E-09                                       | 2.8E-22                                    | 1.4E-08                                                | 0.5                                             | 5.1E-14                                                   | 0.4                                             | 3.4E-19                                                | 0.3                                             | 7.1E-22                                                | 0.2                                             | 1.3E-16                                                 | 0.3                                              |
| 262 | HPT_HUMAN   | HP HPR               | 8.3E-17                                       | 6.9E-37                                    | 8.4E-09                                                | 0.7                                             | 5.8E-20                                                   | 0.5                                             | 5.6E-27                                                | 0.4                                             | 1.3E-31                                                | 0.3                                             | 8.2E-33                                                 | 0.3                                              |
| 263 | HS71L_HUMAN | HSPA1L               | 1.9E-04                                       | 8.7E-05                                    | 1.7E-01                                                | 1.2                                             | 4.2E-02                                                   | 1.2                                             | 1.1E-04                                                | 1.6                                             | 5.1E-04                                                | 1.5                                             | 2.6E-05                                                 | 1.6                                              |
| 264 | HS90A_HUMAN | HSP90AA1<br>HSP90AA2 | 2.1E-11                                       | 5.7E-06                                    | 2.0E-03                                                | 1.7                                             | 7.4E-05                                                   | 1.9                                             | 4.1E-06                                                | 2.2                                             | 7.4E-07                                                | 2.3                                             | 2.2E-05                                                 | 2.0                                              |
| 265 | HS90B_HUMAN | HSP90AB1             | 1.3E-12                                       | 1.1E-05                                    | 2.1E-03                                                | 1.7                                             | 1.3E-04                                                   | 2.0                                             | 6.8E-06                                                | 2.3                                             | 1.6E-06                                                | 2.4                                             | 2.0E-05                                                 | 2.2                                              |
| 266 | HSP13_HUMAN | HSPA13               | 2.7E-02                                       | 7.4E-02                                    | 9.8E-01                                                | 1.0                                             | 2.3E-01                                                   | 1.1                                             | 5.2E-02                                                | 1.2                                             | 1.6E-02                                                | 1.2                                             | 5.6E-02                                                 | 1.2                                              |
| 267 | HSP71_HUMAN | HSPA1A<br>HSPA1B     | 9.4E-12                                       | 1.3E-06                                    | 1.9E-01                                                | 1.2                                             | 6.7E-03                                                   | 1.3                                             | 1.9E-05                                                | 1.6                                             | 1.5E-05                                                | 1.6                                             | 1.5E-06                                                 | 1.7                                              |
| 268 | HSP74_HUMAN | HSPA4                | 4.1E-03                                       | 2.1E-01                                    | 6.9E-02                                                | 1.4                                             | 1.6E-02                                                   | 1.6                                             | 1.2E-01                                                | 1.3                                             | 1.6E-01                                                | 1.3                                             | 4.0E-01                                                 | 1.2                                              |
| 269 | HSP7C_HUMAN | HSPA8                | 3.4E-11                                       | 1.3E-05                                    | 9.3E-03                                                | 1.3                                             | 1.7E-04                                                   | 1.5                                             | 6.5E-06                                                | 1.7                                             | 6.2E-06                                                | 1.7                                             | 1.6E-05                                                 | 1.6                                              |
| 270 | HSPB1_HUMAN | HSPBL2<br>HSPB1      | 7.2E-05                                       | 3.6E-23                                    | 3.5E-06                                                | 2.5                                             | 1.1E-14                                                   | 5.5                                             | 2.5E-18                                                | 7.5                                             | 1.9E-20                                                | 9.0                                             | 5.6E-19                                                 | 7.9                                              |
| 271 | HV101_HUMAN |                      | 2.2E-02                                       | 3.4E-04                                    | 1.7E-03                                                | 0.7                                             | 5.7E-04                                                   | 0.7                                             | 2.1E-04                                                | 0.7                                             | 1.4E-02                                                | 0.8                                             | 5.1E-01                                                 | 0.9                                              |
| 272 | HV206_HUMAN |                      | 3.3E-06                                       | 3.7E-03                                    | 1.9E-02                                                | 0.8                                             | 1.2E-01                                                   | 0.9                                             | 9.0E-03                                                | 0.8                                             | 8.4E-01                                                | 1.0                                             | 3.8E-01                                                 | 1.1                                              |
| 273 | HV208_HUMAN |                      | 8.6E-02                                       | 2.8E-02                                    | 2.7E-02                                                | 0.8                                             | 1.5E-01                                                   | 0.9                                             | 6.5E-02                                                | 0.8                                             | 5.8E-01                                                | 1.1                                             | 9.4E-01                                                 | 1.0                                              |
| 274 | HV209_HUMAN |                      | 5.5E-06                                       | 3.0E-04                                    | 4.8E-03                                                | 0.8                                             | 1.5E-02                                                   | 0.8                                             | 1.0E-03                                                | 0.8                                             | 9.0E-02                                                | 0.9                                             | 5.2E-01                                                 | 1.0                                              |
| 275 | HV301_HUMAN |                      | 2.5E-09                                       | 3.7E-06                                    | 1.3E-03                                                | 0.8                                             | 8.8E-03                                                   | 0.8                                             | 2.7E-03                                                | 0.8                                             | 1.9E-01                                                | 0.9                                             | 1.1E-01                                                 | 1.1                                              |
| 276 | HV302_HUMAN |                      | 1.0E-01                                       | 1.5E-01                                    | 1.6E-01                                                | 0.9                                             | 2.1E-01                                                   | 0.9                                             | 1.0E-01                                                | 0.9                                             | 2.2E-01                                                | 0.9                                             | 4.5E-01                                                 | 1.0                                              |
| 277 | HV304_HUMAN |                      | 1.2E-06                                       | 3.1E-04                                    | 2.0E-02                                                | 0.8                                             | 1.5E-03                                                   | 0.7                                             | 3.2E-04                                                | 0.7                                             | 7.8E-02                                                | 0.8                                             | 9.2E-01                                                 | 1.0                                              |
| 278 | HV305_HUMAN |                      | 1.0E-08                                       | 4.7E-03                                    | 1.4E-02                                                | 0.8                                             | 1.7E-01                                                   | 0.9                                             | 1.1E-01                                                | 0.9                                             | 4.1E-01                                                | 0.9                                             | 1.6E-01                                                 | 1.1                                              |
| 279 | HV306_HUMAN |                      | 1.9E-04                                       | 1.1E-04                                    | 1.0E-02                                                | 0.8                                             | 1.1E-02                                                   | 0.8                                             | 5.3E-04                                                | 0.7                                             | 1.3E-01                                                | 0.9                                             | 3.7E-01                                                 | 1.1                                              |



| No. | Uniprot ID  | Gene symbol                                                       | <i>p</i> -value<br>(Subject)<br><sup>a)</sup> | <i>p</i> -value<br>(Time)<br><sup>b)</sup> | <i>p</i> -value<br>(1 mo vs.<br>0 mo)<br><sup>c)</sup> | Ratio<br>(1 mo<br>vs. 0<br>mo)<br><sup>d)</sup> | <i>p</i> -value<br>(3 mo<br>vs. 0<br>mo)<br><sup>c)</sup> | Ratio<br>(3 mo<br>vs. 0<br>mo)<br><sup>d)</sup> | <i>p</i> -value<br>(6 mo vs.<br>0 mo)<br><sup>c)</sup> | Ratio<br>(6 mo<br>vs. 0<br>mo)<br><sup>d)</sup> | <i>p</i> -value<br>(9 mo vs.<br>0 mo)<br><sup>c)</sup> | Ratio<br>(9 mo<br>vs. 0<br>mo)<br><sup>d)</sup> | <i>p</i> -value<br>(12 mo vs.<br>0 mo)<br><sup>c)</sup> | Ratio<br>(12 mo<br>vs. 0<br>mo)<br><sup>d)</sup> |
|-----|-------------|-------------------------------------------------------------------|-----------------------------------------------|--------------------------------------------|--------------------------------------------------------|-------------------------------------------------|-----------------------------------------------------------|-------------------------------------------------|--------------------------------------------------------|-------------------------------------------------|--------------------------------------------------------|-------------------------------------------------|---------------------------------------------------------|--------------------------------------------------|
| 280 | HV307_HUMAN |                                                                   | 1.1E-08                                       | 2.2E-05                                    | 4.8E-05                                                | 0.7                                             | 1.4E-04                                                   | 0.7                                             | 5.2E-06                                                | 0.7                                             | 1.3E-03                                                | 0.8                                             | 9.5E-02                                                 | 0.9                                              |
| 281 | HV319_HUMAN |                                                                   | 7.3E-02                                       | 1.5E-02                                    | 2.0E-01                                                | 0.9                                             | 6.2E-01                                                   | 1.0                                             | 7.2E-01                                                | 1.0                                             | 4.8E-01                                                | 1.1                                             | 2.2E-02                                                 | 1.2                                              |
| 282 | HV320_HUMAN |                                                                   | 1.1E-08                                       | 6.1E-07                                    | 1.9E-04                                                | 0.8                                             | 5.1E-04                                                   | 0.8                                             | 7.4E-05                                                | 0.8                                             | 2.4E-01                                                | 0.9                                             | 5.7E-01                                                 | 1.0                                              |
| 283 | HYOU1_HUMAN | HYOU1                                                             | 1.2E-03                                       | 2.0E-01                                    | 5.8E-01                                                | 1.0                                             | 8.1E-01                                                   | 1.0                                             | 6.7E-01                                                | 1.0                                             | 1.5E-01                                                | 0.9                                             | 3.8E-02                                                 | 0.9                                              |
| 284 | I18BP_HUMAN | IL18BP                                                            | 1.5E-05                                       | 5.6E-06                                    | 7.9E-01                                                | 1.0                                             | 5.3E-01                                                   | 0.9                                             | 8.9E-03                                                | 0.7                                             | 1.3E-04                                                | 0.6                                             | 2.3E-06                                                 | 0.5                                              |
| 285 | IBP2_HUMAN  | IGFBP2                                                            | 2.2E-21                                       | 1.1E-11                                    | 1.5E-07                                                | 1.5                                             | 2.2E-03                                                   | 1.2                                             | 1.3E-01                                                | 1.1                                             | 3.9E-01                                                | 0.9                                             | 3.9E-02                                                 | 0.9                                              |
| 286 | IC1_HUMAN   | SERPING1                                                          | 1.4E-10                                       | 4.3E-29                                    | 1.1E-01                                                | 0.9                                             | 9.5E-09                                                   | 0.8                                             | 2.9E-18                                                | 0.7                                             | 8.2E-22                                                | 0.6                                             | 1.2E-22                                                 | 0.6                                              |
| 287 | ICAM1_HUMAN | ICAM1                                                             | 1.9E-03                                       | 7.7E-05                                    | 2.6E-01                                                | 1.2                                             | 1.0E-01                                                   | 1.2                                             | 3.5E-01                                                | 1.1                                             | 8.4E-04                                                | 1.6                                             | 6.4E-06                                                 | 1.8                                              |
| 288 | IDHC_HUMAN  | IDH1                                                              | 2.1E-12                                       | 8.9E-11                                    | 8.3E-08                                                | 2.1                                             | 2.9E-10                                                   | 2.5                                             | 7.4E-11                                                | 2.6                                             | 1.2E-08                                                | 2.2                                             | 2.2E-08                                                 | 2.2                                              |
| 289 | IF4A1_HUMAN | EIF4A1<br>EIF4A1P4<br>SNORA67                                     | 5.6E-04                                       | 6.3E-01                                    | 5.3E-01                                                | 1.1                                             | 1.2E-01                                                   | 1.3                                             | 3.9E-01                                                | 1.2                                             | 3.3E-01                                                | 1.2                                             | 9.6E-01                                                 | 1.0                                              |
| 290 | IF5A1_HUMAN | EIF5A1<br>EIF5A                                                   | 8.2E-11                                       | 8.4E-06                                    | 1.2E-03                                                | 1.6                                             | 8.8E-05                                                   | 1.8                                             | 1.1E-06                                                | 2.1                                             | 3.6E-06                                                | 2.0                                             | 7.2E-05                                                 | 1.8                                              |
| 291 | IGHA1_HUMAN | IGHA1                                                             | 5.0E-07                                       | 1.5E-06                                    | 2.8E-03                                                | 0.8                                             | 8.3E-03                                                   | 0.8                                             | 3.1E-03                                                | 0.8                                             | 4.7E-01                                                | 0.9                                             | 5.7E-02                                                 | 1.2                                              |
| 292 | IGHA2_HUMAN | IGHA2                                                             | 3.5E-07                                       | 1.2E-06                                    | 1.9E-03                                                | 0.8                                             | 2.8E-03                                                   | 0.8                                             | 8.8E-04                                                | 0.8                                             | 3.4E-01                                                | 0.9                                             | 1.3E-01                                                 | 1.1                                              |
| 293 | IGHG1_HUMAN | IGH@<br>IGHG3<br>IGHM<br>IGHV3-11<br>IGHV3-7<br>IGHG1<br>IGHV4-31 | 7.4E-15                                       | 7.2E-39                                    | 6.5E-09                                                | 1.3                                             | 5.5E-23                                                   | 1.7                                             | 3.6E-30                                                | 2.0                                             | 1.5E-32                                                | 2.1                                             | 6.2E-34                                                 | 2.2                                              |
| 294 | IGHG2_HUMAN | IGHG2                                                             | 7.5E-13                                       | 4.7E-38                                    | 1.4E-11                                                | 1.4                                             | 7.7E-26                                                   | 1.8                                             | 9.8E-31                                                | 2.0                                             | 9.6E-32                                                | 2.0                                             | 6.7E-34                                                 | 2.1                                              |
| 295 | IGHG3_HUMAN | IGH@<br>IGHG3<br>IGHM<br>IGHV3-11<br>IGHV3-7<br>IGHG1<br>IGHV4-31 | 1.8E-10                                       | 1.1E-36                                    | 2.8E-09                                                | 1.3                                             | 8.4E-23                                                   | 1.7                                             | 6.0E-29                                                | 2.0                                             | 1.8E-30                                                | 2.1                                             | 7.1E-33                                                 | 2.2                                              |
| 296 | IGHG4_HUMAN | IGHG4                                                             | 6.4E-05                                       | 1.8E-18                                    | 1.7E-05                                                | 1.3                                             | 3.3E-13                                                   | 1.8                                             | 1.5E-15                                                | 2.0                                             | 9.2E-16                                                | 2.0                                             | 2.5E-17                                                 | 2.1                                              |
| 297 | IGHM_HUMAN  | IGH@<br>IGHG3<br>IGHM<br>IGHV3-11<br>IGHV3-7<br>IGHG1<br>IGHV4-31 | 3.8E-10                                       | 1.7E-27                                    | 4.0E-15                                                | 0.4                                             | 1.0E-20                                                   | 0.3                                             | 3.5E-25                                                | 0.3                                             | 1.5E-25                                                | 0.3                                             | 1.5E-20                                                 | 0.3                                              |
| 298 | IGJ_HUMAN   | IGJ                                                               | 1.7E-04                                       | 1.6E-06                                    | 3.2E-02                                                | 0.9                                             | 5.2E-01                                                   | 1.0                                             | 4.9E-01                                                | 1.0                                             | 3.5E-02                                                | 1.2                                             | 1.4E-03                                                 | 1.3                                              |
| 299 | IGKC_HUMAN  | IGKC                                                              | 2.4E-06                                       | 1.6E-06                                    | 1.9E-03                                                | 0.8                                             | 3.0E-02                                                   | 0.8                                             | 4.4E-03                                                | 0.8                                             | 4.9E-01                                                | 0.9                                             | 3.9E-02                                                 | 1.2                                              |
| 300 | IGLL5_HUMAN |                                                                   | 3.7E-07                                       | 1.1E-07                                    | 1.2E-03                                                | 0.8                                             | 2.0E-02                                                   | 0.8                                             | 1.5E-02                                                | 0.8                                             | 1.0E+00                                                | 1.0                                             | 1.0E-02                                                 | 1.2                                              |

| No. | Uniprot ID  | Gene symbol | <i>p</i> -value<br>(Subject)<br><sup>a)</sup> | <i>p</i> -value<br>(Time)<br><sup>b)</sup> | <i>p</i> -value<br>(1 mo vs.<br>0 mo)<br><sup>c)</sup> | Ratio<br>(1 mo<br>vs. 0<br>mo)<br><sup>d)</sup> | <i>p</i> -value<br>(3 mo<br>vs. 0<br>mo)<br><sup>c)</sup> | Ratio<br>(3 mo<br>vs. 0<br>mo)<br><sup>d)</sup> | <i>p</i> -value<br>(6 mo vs.<br>0 mo)<br><sup>c)</sup> | Ratio<br>(6 mo<br>vs. 0<br>mo)<br><sup>d)</sup> | <i>p</i> -value<br>(9 mo vs.<br>0 mo)<br><sup>c)</sup> | Ratio<br>(9 mo<br>vs. 0<br>mo)<br><sup>d)</sup> | <i>p</i> -value<br>(12 mo vs.<br>0 mo)<br><sup>c)</sup> | Ratio<br>(12 mo<br>vs. 0<br>mo)<br><sup>d)</sup> |
|-----|-------------|-------------|-----------------------------------------------|--------------------------------------------|--------------------------------------------------------|-------------------------------------------------|-----------------------------------------------------------|-------------------------------------------------|--------------------------------------------------------|-------------------------------------------------|--------------------------------------------------------|-------------------------------------------------|---------------------------------------------------------|--------------------------------------------------|
| 301 | IL19_HUMAN  | IL19        | 5.5E-05                                       | 4.7E-19                                    | 2.3E-02                                                | 1.2                                             | 1.2E-06                                                   | 1.6                                             | 2.5E-12                                                | 2.0                                             | 1.8E-15                                                | 2.3                                             | 3.4E-16                                                 | 2.4                                              |
| 302 | ILEU_HUMAN  | SERPINB1    | 8.1E-03                                       | 1.8E-02                                    | 2.4E-01                                                | 1.1                                             | 3.8E-03                                                   | 1.4                                             | 2.3E-02                                                | 1.3                                             | 5.7E-03                                                | 1.4                                             | 6.1E-03                                                 | 1.4                                              |
| 303 | IMB1_HUMAN  | KPNB1       | 2.7E-03                                       | 1.9E-01                                    | 3.2E-01                                                | 1.2                                             | 5.8E-02                                                   | 1.4                                             | 6.0E-02                                                | 1.4                                             | 6.2E-02                                                | 1.4                                             | 2.3E-02                                                 | 1.5                                              |
| 304 | INADL_HUMAN | INADL       | 4.6E-03                                       | 6.3E-01                                    | 6.0E-01                                                | 1.1                                             | 4.7E-01                                                   | 1.1                                             | 8.2E-01                                                | 1.0                                             | 3.9E-01                                                | 1.2                                             | 8.9E-02                                                 | 1.4                                              |
| 305 | IPYR_HUMAN  | PPA1        | 1.6E-05                                       | 5.5E-13                                    | 1.5E-03                                                | 1.6                                             | 2.6E-08                                                   | 2.3                                             | 8.7E-10                                                | 2.6                                             | 7.5E-12                                                | 3.0                                             | 2.1E-11                                                 | 2.9                                              |
| 306 | IQGA1_HUMAN | IQGAP1      | 4.6E-12                                       | 4.9E-03                                    | 3.6E-01                                                | 1.1                                             | 3.5E-02                                                   | 1.3                                             | 2.5E-03                                                | 1.5                                             | 8.6E-03                                                | 1.4                                             | 8.1E-04                                                 | 1.6                                              |
| 307 | ITIH1_HUMAN | ITIH1       | 1.1E-08                                       | 2.3E-03                                    | 2.1E-01                                                | 1.1                                             | 4.9E-01                                                   | 1.0                                             | 1.3E-01                                                | 0.9                                             | 1.1E-01                                                | 0.9                                             | 1.7E-02                                                 | 0.9                                              |
| 308 | ITIH2_HUMAN | ITIH2       | 5.6E-09                                       | 5.1E-15                                    | 3.1E-02                                                | 1.1                                             | 2.8E-01                                                   | 1.0                                             | 5.0E-02                                                | 0.9                                             | 4.5E-04                                                | 0.9                                             | 7.2E-10                                                 | 0.8                                              |
| 309 | ITIH4_HUMAN | ITIH4       | 6.2E-13                                       | 1.9E-23                                    | 1.2E-06                                                | 0.8                                             | 1.2E-11                                                   | 0.7                                             | 3.3E-15                                                | 0.6                                             | 1.2E-18                                                | 0.6                                             | 2.5E-23                                                 | 0.5                                              |
| 310 | K1C9_HUMAN  | KRT9        | 7.0E-05                                       | 1.8E-01                                    | 3.3E-02                                                | 2.4                                             | 8.0E-01                                                   | 0.9                                             | 1.9E-01                                                | 1.7                                             | 2.4E-01                                                | 1.6                                             | 6.8E-01                                                 | 1.2                                              |
| 311 | K2C1_HUMAN  | KRT1        | 1.0E-04                                       | 3.0E-03                                    | 4.8E-02                                                | 2.0                                             | 6.3E-02                                                   | 0.5                                             | 4.0E-02                                                | 0.5                                             | 9.8E-01                                                | 1.0                                             | 6.2E-01                                                 | 0.9                                              |
| 312 | K6PL_HUMAN  | PFKL        | 2.8E-01                                       | 3.7E-01                                    | 2.6E-01                                                | 1.1                                             | 1.1E-01                                                   | 1.1                                             | 4.2E-02                                                | 1.2                                             | 9.0E-02                                                | 1.2                                             | 2.6E-01                                                 | 1.1                                              |
| 313 | KAD1_HUMAN  | AK1         | 3.8E-11                                       | 2.5E-08                                    | 1.5E-03                                                | 1.7                                             | 2.3E-07                                                   | 2.5                                             | 2.8E-08                                                | 2.8                                             | 2.0E-06                                                | 2.3                                             | 7.9E-08                                                 | 2.6                                              |
| 314 | KAIN_HUMAN  | SERPINA4    | 8.6E-01                                       | 1.2E-02                                    | 2.0E-01                                                | 1.0                                             | 4.9E-03                                                   | 1.1                                             | 4.0E-01                                                | 1.0                                             | 5.2E-01                                                | 1.0                                             | 3.1E-01                                                 | 1.0                                              |
| 315 | KCD14_HUMAN | KCTD14      | 4.0E-01                                       | 9.9E-02                                    | 8.4E-01                                                | 1.0                                             | 7.8E-01                                                   | 1.0                                             | 6.5E-01                                                | 1.0                                             | 3.0E-02                                                | 1.3                                             | 6.0E-02                                                 | 1.2                                              |
| 316 | KCY_HUMAN   | CMPK1       | 8.1E-13                                       | 2.7E-14                                    | 1.9E-05                                                | 2.1                                             | 5.3E-10                                                   | 3.2                                             | 2.4E-11                                                | 3.5                                             | 5.2E-13                                                | 4.0                                             | 4.8E-13                                                 | 4.1                                              |
| 317 | KLK6_HUMAN  | KLK6        | 5.3E-16                                       | 4.7E-29                                    | 6.6E-05                                                | 1.3                                             | 1.2E-13                                                   | 1.8                                             | 7.6E-20                                                | 2.2                                             | 8.1E-23                                                | 2.4                                             | 3.3E-26                                                 | 2.7                                              |
| 318 | KNG1_HUMAN  | KNG1        | 1.5E-07                                       | 6.5E-27                                    | 3.6E-09                                                | 0.8                                             | 1.3E-13                                                   | 0.7                                             | 8.8E-20                                                | 0.6                                             | 1.3E-22                                                | 0.6                                             | 8.4E-26                                                 | 0.6                                              |
| 319 | KPYM_HUMAN  | PKM2        | 6.1E-12                                       | 2.0E-05                                    | 9.4E-02                                                | 1.3                                             | 7.0E-03                                                   | 1.5                                             | 1.1E-03                                                | 1.6                                             | 6.4E-05                                                | 1.8                                             | 1.4E-06                                                 | 2.1                                              |
| 320 | KV105_HUMAN |             | 1.1E-04                                       | 3.7E-05                                    | 1.0E-02                                                | 0.8                                             | 5.8E-02                                                   | 0.8                                             | 3.7E-01                                                | 0.9                                             | 6.4E-01                                                | 1.0                                             | 9.0E-03                                                 | 1.3                                              |
| 321 | KV106_HUMAN |             | 1.4E-04                                       | 6.5E-05                                    | 3.9E-03                                                | 0.8                                             | 5.0E-03                                                   | 0.8                                             | 1.6E-03                                                | 0.8                                             | 8.8E-02                                                | 0.9                                             | 3.7E-01                                                 | 1.1                                              |
| 322 | KV116_HUMAN |             | 1.1E-02                                       | 4.7E-02                                    | 6.3E-02                                                | 0.8                                             | 1.7E-01                                                   | 0.9                                             | 3.8E-02                                                | 0.8                                             | 3.8E-01                                                | 0.9                                             | 4.2E-01                                                 | 1.1                                              |
| 323 | KV117_HUMAN |             | 5.0E-05                                       | 3.4E-05                                    | 4.6E-03                                                | 0.8                                             | 2.1E-01                                                   | 0.9                                             | 1.3E-01                                                | 0.9                                             | 3.9E-01                                                | 1.1                                             | 3.0E-02                                                 | 1.2                                              |
| 324 | KV119_HUMAN |             | 2.3E-03                                       | 8.8E-02                                    | 5.0E-01                                                | 0.9                                             | 2.8E-01                                                   | 0.9                                             | 7.5E-02                                                | 0.8                                             | 4.1E-01                                                | 1.1                                             | 3.4E-01                                                 | 1.1                                              |
| 325 | KV121_HUMAN |             | 7.4E-02                                       | 6.5E-05                                    | 8.6E-03                                                | 0.8                                             | 5.7E-02                                                   | 0.9                                             | 4.5E-02                                                | 0.8                                             | 5.8E-01                                                | 1.0                                             | 1.7E-02                                                 | 1.2                                              |
| 326 | KV122_HUMAN |             | 4.3E-04                                       | 2.1E-05                                    | 3.3E-01                                                | 0.9                                             | 5.8E-01                                                   | 1.0                                             | 1.7E-01                                                | 1.1                                             | 9.4E-02                                                | 1.2                                             | 1.3E-05                                                 | 1.5                                              |
| 327 | KV203_HUMAN |             | 4.0E-07                                       | 4.6E-07                                    | 1.5E-03                                                | 0.8                                             | 4.2E-03                                                   | 0.8                                             | 2.8E-05                                                | 0.7                                             | 3.6E-01                                                | 0.9                                             | 2.9E-01                                                 | 1.1                                              |
| 328 | KV204_HUMAN |             | 6.6E-07                                       | 9.0E-07                                    | 3.6E-03                                                | 0.8                                             | 6.9E-03                                                   | 0.8                                             | 4.7E-06                                                | 0.7                                             | 1.7E-01                                                | 0.9                                             | 4.3E-01                                                 | 1.1                                              |
| 329 | KV206_HUMAN |             | 3.8E-01                                       | 4.3E-02                                    | 1.3E-01                                                | 0.9                                             | 2.1E-01                                                   | 0.9                                             | 1.7E-01                                                | 0.9                                             | 9.4E-01                                                | 1.0                                             | 1.9E-01                                                 | 1.1                                              |
| 330 | KV301_HUMAN |             | 5.5E-08                                       | 3.5E-02                                    | 7.0E-02                                                | 0.8                                             | 5.0E-02                                                   | 0.8                                             | 4.3E-03                                                | 0.7                                             | 2.0E-01                                                | 0.9                                             | 8.9E-01                                                 | 1.0                                              |
| 331 | KV302_HUMAN |             | 5.1E-01                                       | 3.0E-02                                    | 1.8E-02                                                | 0.9                                             | 4.4E-02                                                   | 0.9                                             | 8.2E-03                                                | 0.9                                             | 7.7E-02                                                | 0.9                                             | 8.6E-01                                                 | 1.0                                              |
| 332 | KV303_HUMAN |             | 1.2E-02                                       | 2.6E-01                                    | 1.8E-01                                                | 0.9                                             | 4.6E-01                                                   | 1.0                                             | 9.3E-02                                                | 0.9                                             | 5.8E-01                                                | 1.0                                             | 5.8E-01                                                 | 1.0                                              |
| 333 | KV305_HUMAN |             | 7.7E-03                                       | 2.7E-02                                    | 2.5E-02                                                | 0.9                                             | 1.6E-02                                                   | 0.8                                             | 4.3E-03                                                | 0.8                                             | 9.4E-02                                                | 0.9                                             | 6.1E-01                                                 | 1.0                                              |
| 334 | KV308_HUMAN |             | 2.7E-04                                       | 5.1E-01                                    | 2.2E-01                                                | 0.9                                             | 2.9E-01                                                   | 0.9                                             | 1.8E-01                                                | 0.9                                             | 8.1E-02                                                | 0.8                                             | 1.0E-01                                                 | 0.8                                              |
| 335 | KV309_HUMAN | IGKV3D-11   | 1.6E-06                                       | 1.4E-01                                    | 1.9E-01                                                | 0.8                                             | 7.3E-01                                                   | 0.9                                             | 2.2E-01                                                | 0.8                                             | 5.9E-01                                                | 0.9                                             | 1.0E-02                                                 | 0.7                                              |
| 336 | KV402_HUMAN |             | 3.0E-05                                       | 6.4E-04                                    | 6.8E-02                                                | 0.8                                             | 4.9E-03                                                   | 0.8                                             | 6.3E-04                                                | 0.7                                             | 2.6E-01                                                | 0.9                                             | 5.7E-01                                                 | 1.1                                              |

| No. | Uniprot ID  | Gene symbol | <i>p</i> -value<br>(Subject)<br><i>a)</i> | <i>p</i> -value<br>(Time)<br><i>b)</i> | <i>p</i> -value<br>(1 mo vs.<br>0 mo)<br><i>c)</i> | Ratio<br>(1 mo<br>vs. 0<br>mo)<br><i>d)</i> | <i>p</i> -value<br>(3 mo<br>vs. 0<br>mo)<br><i>c)</i> | Ratio<br>(3 mo<br>vs. 0<br>mo)<br><i>d)</i> | <i>p</i> -value<br>(6 mo vs.<br>0 mo)<br><i>c)</i> | Ratio<br>(6 mo<br>vs. 0<br>mo)<br><i>d)</i> | <i>p</i> -value<br>(9 mo vs.<br>0 mo)<br><i>c)</i> | Ratio<br>(9 mo<br>vs. 0<br>mo)<br><i>d)</i> | <i>p</i> -value<br>(12 mo vs.<br>0 mo)<br><i>c)</i> | Ratio<br>(12 mo<br>vs. 0<br>mo)<br><i>d)</i> |
|-----|-------------|-------------|-------------------------------------------|----------------------------------------|----------------------------------------------------|---------------------------------------------|-------------------------------------------------------|---------------------------------------------|----------------------------------------------------|---------------------------------------------|----------------------------------------------------|---------------------------------------------|-----------------------------------------------------|----------------------------------------------|
| 337 | LAC2_HUMAN  |             | 2.3E-06                                   | 1.2E-07                                | 2.3E-03                                            | 0.8                                         | 3.1E-02                                               | 0.8                                         | 2.8E-02                                            | 0.8                                         | 8.6E-01                                            | 1.0                                         | 5.2E-03                                             | 1.3                                          |
| 338 | LAC7_HUMAN  |             | 1.2E-06                                   | 5.2E-05                                | 2.2E-03                                            | 0.8                                         | 1.7E-02                                               | 0.8                                         | 2.9E-02                                            | 0.8                                         | 5.4E-01                                            | 1.0                                         | 9.2E-02                                             | 1.1                                          |
| 339 | LALBA_HUMAN | LALBA       | 1.5E-11                                   | 4.6E-09                                | 5.4E-06                                            | 1.3                                         | 6.0E-05                                               | 1.3                                         | 3.6E-03                                            | 1.2                                         | 1.7E-02                                            | 1.1                                         | 1.5E-01                                             | 0.9                                          |
| 340 | LASP1_HUMAN | LASP1       | 2.9E-15                                   | 2.6E-12                                | 7.0E-05                                            | 1.9                                         | 4.1E-07                                               | 2.3                                         | 8.6E-09                                            | 2.7                                         | 1.9E-11                                            | 3.2                                         | 3.5E-12                                             | 3.5                                          |
| 341 | LDHA_HUMAN  | LDHA        | 8.3E-12                                   | 1.4E-08                                | 2.2E-02                                            | 1.4                                         | 6.3E-05                                               | 1.7                                         | 2.1E-06                                            | 1.9                                         | 2.6E-07                                            | 2.1                                         | 5.6E-09                                             | 2.3                                          |
| 342 | LDHB_HUMAN  | LDHB        | 2.1E-12                                   | 7.7E-14                                | 5.9E-04                                            | 1.5                                         | 8.1E-09                                               | 2.2                                         | 7.9E-12                                            | 2.6                                         | 1.5E-12                                            | 2.7                                         | 3.7E-11                                             | 2.5                                          |
| 343 | LEG1_HUMAN  | LGALS1      | 7.2E-01                                   | 9.4E-03                                | 4.3E-03                                            | 1.2                                         | 1.3E-02                                               | 1.2                                         | 3.5E-03                                            | 1.2                                         | 3.1E-03                                            | 1.2                                         | 1.7E-03                                             | 1.3                                          |
| 344 | LEG3_HUMAN  | LGALS3      | 3.0E-04                                   | 1.2E-05                                | 2.3E-01                                            | 1.2                                         | 5.4E-01                                               | 1.1                                         | 1.8E-01                                            | 1.2                                         | 1.2E-05                                            | 1.8                                         | 5.4E-05                                             | 1.7                                          |
| 345 | LG3BP_HUMAN | LGALS3BP    | 6.2E-05                                   | 4.1E-20                                | 1.1E-01                                            | 0.9                                         | 1.1E-06                                               | 0.7                                         | 6.0E-16                                            | 0.5                                         | 3.4E-15                                            | 0.6                                         | 7.5E-13                                             | 0.6                                          |
| 346 | LGMN_HUMAN  | LGMN        | 9.3E-02                                   | 3.8E-02                                | 4.5E-02                                            | 0.8                                         | 7.3E-02                                               | 0.8                                         | 9.1E-01                                            | 1.0                                         | 9.5E-01                                            | 1.0                                         | 3.2E-01                                             | 1.1                                          |
| 347 | LGUL_HUMAN  | GLO1        | 3.8E-05                                   | 4.0E-03                                | 1.2E-01                                            | 1.4                                         | 1.8E-02                                               | 1.6                                         | 1.7E-02                                            | 1.6                                         | 2.8E-04                                            | 2.1                                         | 8.5E-04                                             | 2.0                                          |
| 348 | LIPL_HUMAN  | LPL         | 2.2E-13                                   | 3.2E-17                                | 3.9E-07                                            | 0.5                                         | 2.3E-11                                               | 0.4                                         | 9.5E-16                                            | 0.3                                         | 9.3E-17                                            | 0.3                                         | 6.8E-12                                             | 0.4                                          |
| 349 | LKHA4_HUMAN | LTA4H       | 1.8E-03                                   | 1.9E-03                                | 6.9E-02                                            | 1.3                                         | 3.5E-03                                               | 1.5                                         | 1.7E-04                                            | 1.8                                         | 4.1E-04                                            | 1.7                                         | 1.4E-02                                             | 1.4                                          |
| 350 | LSR_HUMAN   | LSR         | 2.6E-04                                   | 4.0E-01                                | 2.2E-01                                            | 1.1                                         | 8.4E-01                                               | 1.0                                         | 6.8E-01                                            | 1.0                                         | 3.4E-01                                            | 0.9                                         | 6.5E-01                                             | 1.0                                          |
| 351 | LUM_HUMAN   | LUM         | 3.1E-09                                   | 2.8E-05                                | 2.9E-04                                            | 1.3                                         | 7.6E-03                                               | 1.2                                         | 5.6E-01                                            | 1.0                                         | 4.7E-01                                            | 0.9                                         | 3.3E-01                                             | 0.9                                          |
| 352 | LV001_HUMAN | IGLV7-43    | 8.3E-11                                   | 4.5E-05                                | 7.1E-04                                            | 0.8                                         | 7.1E-04                                               | 0.8                                         | 1.2E-05                                            | 0.7                                         | 2.1E-02                                            | 0.8                                         | 4.5E-01                                             | 0.9                                          |
| 353 | LV102_HUMAN |             | 1.1E-06                                   | 1.1E-07                                | 1.8E-03                                            | 0.7                                         | 3.2E-03                                               | 0.7                                         | 4.2E-03                                            | 0.7                                         | 6.8E-01                                            | 1.0                                         | 7.6E-03                                             | 1.3                                          |
| 354 | LV105_HUMAN |             | 8.6E-01                                   | 6.2E-05                                | 1.7E-04                                            | 0.7                                         | 5.1E-02                                               | 0.8                                         | 1.6E-03                                            | 0.7                                         | 5.0E-01                                            | 0.9                                         | 2.9E-01                                             | 1.1                                          |
| 355 | LV301_HUMAN |             | 8.7E-04                                   | 4.3E-02                                | 1.1E-02                                            | 0.8                                         | 3.7E-02                                               | 0.8                                         | 3.9E-03                                            | 0.7                                         | 3.6E-02                                            | 0.8                                         | 2.3E-01                                             | 0.9                                          |
| 356 | LV302_HUMAN |             | 4.9E-06                                   | 7.6E-06                                | 5.1E-04                                            | 0.8                                         | 5.3E-04                                               | 0.8                                         | 9.4E-04                                            | 0.8                                         | 2.6E-01                                            | 0.9                                         | 5.9E-01                                             | 1.0                                          |
| 357 | LV401_HUMAN |             | 2.4E-02                                   | 2.9E-01                                | 4.5E-01                                            | 0.9                                         | 7.1E-01                                               | 1.1                                         | 2.1E-01                                            | 0.8                                         | 5.0E-01                                            | 1.1                                         | 4.0E-01                                             | 1.1                                          |
| 358 | LV403_HUMAN |             | 6.7E-03                                   | 4.8E-01                                | 8.5E-01                                            | 1.0                                         | 5.1E-01                                               | 1.0                                         | 6.9E-01                                            | 1.0                                         | 1.9E-01                                            | 1.0                                         | 6.0E-01                                             | 1.0                                          |
| 359 | LYPA1_HUMAN | LYPLA1      | 1.3E-09                                   | 9.7E-11                                | 1.2E-04                                            | 2.0                                         | 1.2E-07                                               | 2.8                                         | 3.2E-09                                            | 3.3                                         | 5.8E-10                                            | 3.6                                         | 5.5E-10                                             | 3.7                                          |
| 360 | LYPD3_HUMAN | LYPD3       | 3.2E-01                                   | 2.1E-01                                | 8.3E-01                                            | 1.0                                         | 3.1E-01                                               | 0.9                                         | 2.7E-02                                            | 0.8                                         | 3.5E-01                                            | 0.9                                         | 3.6E-01                                             | 0.9                                          |
| 361 | LYSC_HUMAN  | LYZ         | 6.2E-10                                   | 2.3E-14                                | 3.1E-02                                            | 0.7                                         | 6.5E-01                                               | 1.1                                         | 1.3E-02                                            | 1.4                                         | 2.3E-04                                            | 1.7                                         | 3.2E-10                                             | 2.7                                          |
| 362 | MA1A1_HUMAN | MAN1A1      | 2.2E-02                                   | 1.3E-03                                | 2.8E-02                                            | 0.9                                         | 7.8E-03                                               | 0.8                                         | 9.6E-04                                            | 0.8                                         | 1.5E-04                                            | 0.8                                         | 5.8E-04                                             | 0.8                                          |
| 363 | MA2B1_HUMAN | MAN2B1      | 2.5E-01                                   | 4.0E-05                                | 1.9E-02                                            | 1.2                                         | 1.4E-04                                               | 1.4                                         | 7.6E-05                                            | 1.4                                         | 1.4E-05                                            | 1.4                                         | 5.4E-05                                             | 1.4                                          |
| 364 | MANBA_HUMAN | MANBA       | 8.1E-06                                   | 1.5E-04                                | 5.5E-01                                            | 1.0                                         | 9.8E-01                                               | 1.0                                         | 4.5E-01                                            | 0.9                                         | 2.1E-03                                            | 0.8                                         | 3.7E-04                                             | 0.8                                          |
| 365 | MARCS_HUMAN | MARCKS      | 4.6E-09                                   | 1.0E-02                                | 5.1E-01                                            | 1.1                                         | 6.4E-02                                               | 1.2                                         | 6.0E-01                                            | 1.0                                         | 8.7E-02                                            | 0.9                                         | 2.1E-01                                             | 0.9                                          |
| 366 | MATN2_HUMAN | MATN2       | 6.0E-01                                   | 1.5E-03                                | 7.6E-01                                            | 1.0                                         | 3.0E-01                                               | 0.9                                         | 1.6E-02                                            | 0.9                                         | 5.1E-04                                            | 0.8                                         | 2.8E-03                                             | 0.8                                          |
| 367 | MATN3_HUMAN | MATN3       | 3.4E-07                                   | 1.8E-42                                | 2.6E-13                                            | 0.5                                         | 2.0E-24                                               | 0.3                                         | 1.2E-32                                            | 0.1                                         | 1.4E-37                                            | 0.1                                         | 2.4E-39                                             | 0.1                                          |
| 368 | MDHC_HUMAN  | MDH1        | 2.8E-12                                   | 2.1E-10                                | 2.6E-04                                            | 1.5                                         | 1.4E-07                                               | 1.9                                         | 7.9E-10                                            | 2.1                                         | 9.5E-10                                            | 2.1                                         | 5.2E-09                                             | 2.0                                          |
| 369 | MFGM_HUMAN  | MFGE8       | 1.6E-23                                   | 1.1E-18                                | 4.0E-04                                            | 0.8                                         | 3.6E-16                                               | 0.5                                         | 3.1E-15                                            | 0.6                                         | 7.1E-15                                            | 0.6                                         | 1.4E-08                                             | 0.7                                          |
| 370 | MOES_HUMAN  | MSN         | 2.9E-12                                   | 3.5E-04                                | 4.0E-02                                            | 1.2                                         | 9.0E-04                                               | 1.4                                         | 1.8E-04                                            | 1.5                                         | 2.5E-04                                            | 1.4                                         | 7.4E-05                                             | 1.5                                          |
| 371 | MRC1_HUMAN  | MRC1        | 6.3E-19                                   | 5.8E-12                                | 1.1E-03                                            | 1.3                                         | 7.6E-01                                               | 1.0                                         | 7.8E-01                                            | 1.0                                         | 2.3E-03                                            | 0.8                                         | 6.3E-06                                             | 0.7                                          |
| 372 | MRP_HUMAN   | MARCKSL1    | 6.3E-06                                   | 1.1E-01                                | 1.4E-01                                            | 0.8                                         | 5.6E-02                                               | 0.8                                         | 1.0E-02                                            | 0.7                                         | 3.8E-02                                            | 0.8                                         | 6.1E-02                                             | 0.8                                          |

| No. | Uniprot ID  | Gene symbol            | <i>p</i> -value<br>(Subject)<br><sup>a)</sup> | <i>p</i> -value<br>(Time)<br><sup>b)</sup> | <i>p</i> -value<br>(1 mo vs.<br>0 mo)<br><sup>c)</sup> | Ratio<br>(1 mo<br>vs. 0<br>mo)<br><sup>d)</sup> | <i>p</i> -value<br>(3 mo<br>vs. 0<br>mo)<br><sup>c)</sup> | Ratio<br>(3 mo<br>vs. 0<br>mo)<br><sup>d)</sup> | <i>p</i> -value<br>(6 mo vs.<br>0 mo)<br><sup>c)</sup> | Ratio<br>(6 mo<br>vs. 0<br>mo)<br><sup>d)</sup> | <i>p</i> -value<br>(9 mo vs.<br>0 mo)<br><sup>c)</sup> | Ratio<br>(9 mo<br>vs. 0<br>mo)<br><sup>d)</sup> | <i>p</i> -value<br>(12 mo vs.<br>0 mo)<br><sup>c)</sup> | Ratio<br>(12 mo<br>vs. 0<br>mo)<br><sup>d)</sup> |
|-----|-------------|------------------------|-----------------------------------------------|--------------------------------------------|--------------------------------------------------------|-------------------------------------------------|-----------------------------------------------------------|-------------------------------------------------|--------------------------------------------------------|-------------------------------------------------|--------------------------------------------------------|-------------------------------------------------|---------------------------------------------------------|--------------------------------------------------|
| 373 | MUC1_HUMAN  | MUC1                   | 1.3E-16                                       | 2.3E-03                                    | 3.2E-02                                                | 0.8                                             | 3.9E-05                                                   | 0.7                                             | 5.3E-02                                                | 0.8                                             | 4.6E-03                                                | 0.8                                             | 5.9E-03                                                 | 0.8                                              |
| 374 | MUC4_HUMAN  | MUC4                   | 6.4E-22                                       | 2.5E-03                                    | 2.4E-01                                                | 0.9                                             | 3.3E-04                                                   | 0.7                                             | 6.9E-03                                                | 0.8                                             | 2.4E-03                                                | 0.8                                             | 3.0E-03                                                 | 0.8                                              |
| 375 | MUCB_HUMAN  |                        | 5.9E-06                                       | 4.3E-19                                    | 7.1E-12                                                | 0.4                                             | 6.3E-16                                                   | 0.3                                             | 2.2E-18                                                | 0.2                                             | 6.9E-18                                                | 0.3                                             | 3.6E-14                                                 | 0.3                                              |
| 376 | MUCL1_HUMAN | MUCL1                  | 1.7E-08                                       | 3.0E-03                                    | 2.7E-02                                                | 0.7                                             | 4.2E-04                                                   | 0.5                                             | 6.4E-04                                                | 0.5                                             | 7.6E-02                                                | 0.7                                             | 2.3E-01                                                 | 0.8                                              |
| 377 | MVD1_HUMAN  |                        | 1.3E-04                                       | 1.4E-03                                    | 5.3E-02                                                | 1.4                                             | 2.5E-03                                                   | 1.8                                             | 2.7E-04                                                | 2.1                                             | 2.3E-03                                                | 1.8                                             | 1.1E-03                                                 | 1.9                                              |
| 378 | MYH9_HUMAN  | MYH9                   | 4.1E-06                                       | 4.5E-01                                    | 8.3E-01                                                | 1.0                                             | 9.4E-01                                                   | 1.0                                             | 1.0E+00                                                | 1.0                                             | 2.2E-01                                                | 1.2                                             | 1.0E-01                                                 | 1.2                                              |
| 379 | MYL6_HUMAN  | MYL6                   | 1.6E-07                                       | 3.1E-04                                    | 2.4E-01                                                | 1.2                                             | 2.8E-02                                                   | 1.4                                             | 7.5E-03                                                | 1.5                                             | 5.6E-05                                                | 1.8                                             | 1.7E-04                                                 | 1.7                                              |
| 380 | NAGK_HUMAN  | NAGK                   | 1.5E-01                                       | 1.3E-01                                    | 8.8E-02                                                | 1.2                                             | 1.2E-02                                                   | 1.4                                             | 2.0E-02                                                | 1.3                                             | 4.8E-02                                                | 1.3                                             | 1.1E-01                                                 | 1.2                                              |
| 381 | NAMPT_HUMAN | NAMPT                  | 8.1E-12                                       | 5.0E-11                                    | 2.9E-07                                                | 1.9                                             | 7.2E-09                                                   | 2.1                                             | 1.2E-10                                                | 2.3                                             | 1.8E-10                                                | 2.3                                             | 1.8E-09                                                 | 2.2                                              |
| 382 | NDKA_HUMAN  | NME1-NME2<br>NME2 NME1 | 4.1E-06                                       | 2.5E-09                                    | 8.3E-02                                                | 1.3                                             | 4.4E-04                                                   | 1.7                                             | 7.8E-07                                                | 2.2                                             | 2.0E-09                                                | 2.7                                             | 4.5E-07                                                 | 2.3                                              |
| 383 | NDKB_HUMAN  | NME1-NME2<br>NME2 NME1 | 5.1E-06                                       | 2.0E-09                                    | 3.2E-03                                                | 1.5                                             | 2.5E-04                                                   | 1.7                                             | 2.0E-08                                                | 2.4                                             | 3.3E-09                                                | 2.5                                             | 4.1E-08                                                 | 2.3                                              |
| 384 | NDRG2_HUMAN | NDRG2                  | 1.7E-01                                       | 6.0E-03                                    | 1.1E-01                                                | 1.2                                             | 4.0E-02                                                   | 1.2                                             | 2.9E-02                                                | 1.2                                             | 2.9E-03                                                | 1.3                                             | 2.2E-04                                                 | 1.4                                              |
| 385 | NEUR1_HUMAN | NEU1                   | 2.6E-06                                       | 3.3E-12                                    | 5.9E-03                                                | 0.8                                             | 5.1E-01                                                   | 1.1                                             | 2.7E-04                                                | 1.4                                             | 9.0E-07                                                | 1.6                                             | 3.8E-06                                                 | 1.6                                              |
| 386 | NEUS_HUMAN  | SERPINI1               | 8.3E-06                                       | 1.3E-18                                    | 4.8E-04                                                | 0.7                                             | 1.0E-08                                                   | 0.5                                             | 1.2E-08                                                | 0.5                                             | 2.0E-15                                                | 0.4                                             | 6.5E-19                                                 | 0.3                                              |
| 387 | NHRF1_HUMAN | SLC9A3R1               | 2.6E-17                                       | 3.4E-08                                    | 6.3E-03                                                | 1.4                                             | 5.8E-04                                                   | 1.5                                             | 3.2E-06                                                | 1.7                                             | 2.2E-08                                                | 2.0                                             | 4.4E-08                                                 | 1.9                                              |
| 388 | NIBL1_HUMAN | FAM129B                | 8.9E-04                                       | 3.1E-02                                    | 2.2E-01                                                | 1.3                                             | 1.9E-02                                                   | 1.6                                             | 3.9E-03                                                | 1.8                                             | 1.2E-02                                                | 1.6                                             | 1.9E-02                                                 | 1.6                                              |
| 389 | NLTP_HUMAN  | SCP2                   | 6.7E-08                                       | 1.1E-30                                    | 3.6E-07                                                | 2.1                                             | 1.7E-16                                                   | 4.0                                             | 8.7E-26                                                | 7.4                                             | 3.0E-25                                                | 7.1                                             | 4.9E-26                                                 | 7.5                                              |
| 390 | NPC2_HUMAN  | NPC2                   | 1.7E-12                                       | 1.5E-07                                    | 3.6E-02                                                | 1.1                                             | 8.3E-06                                                   | 1.3                                             | 3.0E-06                                                | 1.3                                             | 5.4E-08                                                | 1.4                                             | 2.0E-05                                                 | 1.3                                              |
| 391 | NPNT_HUMAN  | NPNT                   | 8.3E-01                                       | 1.2E-03                                    | 7.3E-02                                                | 0.8                                             | 1.3E-02                                                   | 0.8                                             | 9.8E-04                                                | 0.7                                             | 9.3E-05                                                | 0.6                                             | 1.4E-03                                                 | 0.7                                              |
| 392 | NPT2B_HUMAN | SLC34A2                | 7.8E-03                                       | 8.3E-01                                    | 9.9E-01                                                | 1.0                                             | 4.3E-01                                                   | 0.9                                             | 9.6E-01                                                | 1.0                                             | 5.1E-01                                                | 1.0                                             | 6.0E-01                                                 | 1.0                                              |
| 393 | NSF1C_HUMAN | NSFL1C                 | 2.0E-02                                       | 9.3E-03                                    | 1.0E-01                                                | 1.8                                             | 2.9E-01                                                   | 1.5                                             | 7.4E-03                                                | 2.8                                             | 8.8E-04                                                | 3.6                                             | 6.9E-03                                                 | 2.8                                              |
| 394 | NUCB1_HUMAN | NUCB1                  | 4.3E-15                                       | 1.4E-12                                    | 1.5E-03                                                | 1.2                                             | 5.5E-08                                                   | 1.4                                             | 1.0E-10                                                | 1.5                                             | 1.5E-12                                                | 1.6                                             | 2.7E-08                                                 | 1.4                                              |
| 395 | NUCB2_HUMAN | NUCB2                  | 3.4E-08                                       | 2.0E-29                                    | 7.7E-10                                                | 1.6                                             | 2.5E-21                                                   | 2.3                                             | 6.4E-26                                                | 2.6                                             | 1.1E-25                                                | 2.6                                             | 3.4E-22                                                 | 2.3                                              |
| 396 | OLA1_HUMAN  | OLA1                   | 3.2E-02                                       | 6.2E-01                                    | 2.8E-01                                                | 1.1                                             | 1.1E-01                                                   | 1.2                                             | 1.3E-01                                                | 1.2                                             | 3.0E-01                                                | 1.1                                             | 4.3E-01                                                 | 1.1                                              |
| 397 | OS9_HUMAN   | OS9                    | 8.3E-08                                       | 9.6E-23                                    | 6.5E-03                                                | 0.8                                             | 3.6E-09                                                   | 0.7                                             | 2.0E-16                                                | 0.5                                             | 4.7E-16                                                | 0.5                                             | 1.5E-20                                                 | 0.5                                              |
| 398 | OSMR_HUMAN  | OSMR                   | 3.6E-04                                       | 2.6E-01                                    | 3.2E-02                                                | 1.1                                             | 5.1E-02                                                   | 1.1                                             | 1.2E-01                                                | 1.1                                             | 4.0E-01                                                | 1.0                                             | 3.3E-01                                                 | 1.1                                              |
| 399 | OSTP_HUMAN  | SPP1                   | 4.1E-16                                       | 3.4E-06                                    | 4.8E-01                                                | 0.9                                             | 6.8E-01                                                   | 1.0                                             | 8.9E-02                                                | 1.2                                             | 6.9E-03                                                | 1.4                                             | 1.4E-05                                                 | 1.7                                              |
| 400 | P3IP1_HUMAN | PIK3IP1                | 6.5E-12                                       | 4.3E-01                                    | 9.0E-01                                                | 1.0                                             | 1.7E-01                                                   | 0.9                                             | 2.7E-01                                                | 0.9                                             | 7.4E-01                                                | 1.0                                             | 8.8E-01                                                 | 1.0                                              |
| 401 | PA2G4_HUMAN | PA2G4<br>PA2G4P4       | 1.1E-10                                       | 7.3E-02                                    | 4.9E-02                                                | 1.3                                             | 7.7E-03                                                   | 1.4                                             | 5.5E-02                                                | 1.3                                             | 9.8E-02                                                | 1.2                                             | 7.6E-03                                                 | 1.4                                              |
| 402 | PABP1_HUMAN | PABPC1<br>PABPC1P4     | 6.0E-09                                       | 1.5E-05                                    | 9.0E-02                                                | 1.3                                             | 3.3E-04                                                   | 1.8                                             | 3.1E-06                                                | 2.2                                             | 3.7E-05                                                | 2.0                                             | 2.4E-04                                                 | 1.9                                              |
| 403 | PARK7_HUMAN | PARK7                  | 1.5E-11                                       | 2.6E-10                                    | 2.4E-05                                                | 1.6                                             | 1.2E-07                                                   | 1.9                                             | 3.8E-10                                                | 2.1                                             | 5.2E-10                                                | 2.1                                             | 1.8E-08                                                 | 2.0                                              |
| 404 | PCBP1_HUMAN | PCBP1                  | 1.4E-09                                       | 1.9E-08                                    | 1.1E-03                                                | 1.7                                             | 6.5E-06                                                   | 2.0                                             | 5.2E-08                                                | 2.4                                             | 2.1E-08                                                | 2.5                                             | 9.6E-08                                                 | 2.4                                              |
| 405 | PCBP2_HUMAN | PCBP2                  | 5.6E-03                                       | 1.6E-04                                    | 2.5E-02                                                | 1.5                                             | 3.6E-03                                                   | 1.7                                             | 2.8E-05                                                | 2.2                                             | 3.7E-04                                                | 1.9                                             | 4.5E-05                                                 | 2.2                                              |
| 406 | PDC61_HUMAN | PDCD6IP                | 1.8E-13                                       | 8.9E-08                                    | 4.0E-02                                                | 1.3                                             | 8.5E-05                                                   | 1.6                                             | 8.6E-06                                                | 1.7                                             | 5.0E-07                                                | 1.8                                             | 5.2E-08                                                 | 1.9                                              |

| No. | Uniprot ID  | Gene symbol | <i>p</i> -value<br>(Subject)<br><sup>a)</sup> | <i>p</i> -value<br>(Time)<br><sup>b)</sup> | <i>p</i> -value<br>(1 mo vs.<br>0 mo)<br><sup>c)</sup> | Ratio<br>(1 mo<br>vs. 0<br>mo)<br><sup>d)</sup> | <i>p</i> -value<br>(3 mo<br>vs. 0<br>mo)<br><sup>c)</sup> | Ratio<br>(3 mo<br>vs. 0<br>mo)<br><sup>d)</sup> | <i>p</i> -value<br>(6 mo vs.<br>0 mo)<br><sup>c)</sup> | Ratio<br>(6 mo<br>vs. 0<br>mo)<br><sup>d)</sup> | <i>p</i> -value<br>(9 mo vs.<br>0 mo)<br><sup>c)</sup> | Ratio<br>(9 mo<br>vs. 0<br>mo)<br><sup>d)</sup> | <i>p</i> -value<br>(12 mo vs.<br>0 mo)<br><sup>c)</sup> | Ratio<br>(12 mo<br>vs. 0<br>mo)<br><sup>d)</sup> |
|-----|-------------|-------------|-----------------------------------------------|--------------------------------------------|--------------------------------------------------------|-------------------------------------------------|-----------------------------------------------------------|-------------------------------------------------|--------------------------------------------------------|-------------------------------------------------|--------------------------------------------------------|-------------------------------------------------|---------------------------------------------------------|--------------------------------------------------|
| 407 | PDCD5_HUMAN | PDCD5       | 4.0E-02                                       | 1.8E-02                                    | 1.5E-02                                                | 1.3                                             | 2.0E-02                                                   | 1.3                                             | 1.6E-02                                                | 1.3                                             | 2.0E-03                                                | 1.4                                             | 2.7E-03                                                 | 1.4                                              |
| 408 | PDIA1_HUMAN | P4HB        | 4.1E-08                                       | 1.9E-15                                    | 4.8E-02                                                | 1.2                                             | 1.0E-05                                                   | 1.4                                             | 7.4E-12                                                | 1.7                                             | 1.1E-12                                                | 1.8                                             | 2.6E-11                                                 | 1.7                                              |
| 409 | PDIA3_HUMAN | PDIA3       | 4.3E-12                                       | 8.6E-02                                    | 1.6E-01                                                | 0.9                                             | 2.7E-01                                                   | 1.1                                             | 1.9E-01                                                | 1.1                                             | 7.0E-01                                                | 1.0                                             | 4.6E-01                                                 | 1.1                                              |
| 410 | PDIA4_HUMAN | PDIA4       | 1.0E-06                                       | 7.5E-02                                    | 2.4E-01                                                | 1.1                                             | 4.2E-03                                                   | 1.3                                             | 5.0E-02                                                | 1.2                                             | 2.0E-01                                                | 1.1                                             | 5.2E-01                                                 | 1.1                                              |
| 411 | PDXK_HUMAN  | PDXK        | 6.3E-05                                       | 2.0E-04                                    | 3.0E-02                                                | 1.7                                             | 1.2E-04                                                   | 2.5                                             | 6.0E-05                                                | 2.7                                             | 1.1E-04                                                | 2.5                                             | 7.2E-03                                                 | 1.9                                              |
| 412 | PEBP1_HUMAN | PEBP1       | 2.4E-15                                       | 9.1E-19                                    | 2.6E-08                                                | 1.9                                             | 7.2E-15                                                   | 2.6                                             | 5.1E-17                                                | 2.9                                             | 1.2E-16                                                | 2.9                                             | 1.6E-14                                                 | 2.6                                              |
| 413 | PEDF_HUMAN  | SERPINF1    | 7.9E-06                                       | 3.8E-12                                    | 4.0E-02                                                | 0.9                                             | 2.2E-04                                                   | 0.8                                             | 6.1E-08                                                | 0.7                                             | 2.1E-10                                                | 0.7                                             | 9.5E-11                                                 | 0.7                                              |
| 414 | PERL_HUMAN  | LPO         | 6.6E-11                                       | 1.0E-11                                    | 2.1E-04                                                | 1.5                                             | 7.4E-12                                                   | 2.3                                             | 4.7E-11                                                | 2.2                                             | 2.1E-06                                                | 1.7                                             | 4.3E-04                                                 | 1.5                                              |
| 415 | PGAM1_HUMAN | PGAM1       | 3.8E-07                                       | 1.5E-07                                    | 1.1E-02                                                | 1.4                                             | 4.2E-05                                                   | 1.8                                             | 5.6E-06                                                | 2.0                                             | 3.4E-08                                                | 2.3                                             | 9.3E-07                                                 | 2.1                                              |
| 416 | PGCP_HUMAN  | PGCP        | 9.2E-15                                       | 4.3E-19                                    | 7.5E-08                                                | 1.5                                             | 8.7E-17                                                   | 1.9                                             | 6.0E-17                                                | 1.9                                             | 8.7E-17                                                | 1.9                                             | 7.9E-11                                                 | 1.6                                              |
| 417 | PGK1_HUMAN  | PGK1        | 5.4E-10                                       | 1.4E-08                                    | 6.2E-05                                                | 1.6                                             | 1.2E-06                                                   | 1.8                                             | 1.7E-08                                                | 2.0                                             | 6.3E-08                                                | 1.9                                             | 1.8E-08                                                 | 2.0                                              |
| 418 | PGM1_HUMAN  | PGM1        | 5.4E-13                                       | 1.1E-04                                    | 8.7E-04                                                | 1.5                                             | 3.0E-05                                                   | 1.6                                             | 6.6E-06                                                | 1.7                                             | 5.5E-04                                                | 1.5                                             | 1.2E-03                                                 | 1.4                                              |
| 419 | PGRP2_HUMAN | PGLYRP2     | 7.7E-02                                       | 1.0E-03                                    | 4.2E-05                                                | 1.3                                             | 2.8E-01                                                   | 1.1                                             | 7.2E-01                                                | 1.0                                             | 4.9E-01                                                | 1.0                                             | 6.3E-02                                                 | 1.1                                              |
| 420 | PIGR_HUMAN  | PIGR        | 6.5E-02                                       | 3.2E-14                                    | 3.3E-09                                                | 0.7                                             | 7.8E-13                                                   | 0.7                                             | 2.3E-14                                                | 0.6                                             | 1.5E-08                                                | 0.7                                             | 4.0E-05                                                 | 0.8                                              |
| 421 | PIPNA_HUMAN | PITPNA      | 3.4E-05                                       | 9.8E-05                                    | 3.8E-01                                                | 1.1                                             | 1.1E-03                                                   | 1.5                                             | 3.2E-04                                                | 1.6                                             | 2.9E-05                                                | 1.7                                             | 2.2E-03                                                 | 1.5                                              |
| 422 | PIP_HUMAN   | PIP         | 1.5E-08                                       | 3.6E-33                                    | 1.3E-24                                                | 0.2                                             | 3.6E-32                                                   | 0.1                                             | 1.1E-29                                                | 0.1                                             | 2.0E-22                                                | 0.2                                             | 8.4E-19                                                 | 0.3                                              |
| 423 | PLIN2_HUMAN | PLIN2       | 2.4E-14                                       | 1.6E-16                                    | 6.8E-03                                                | 1.3                                             | 3.6E-07                                                   | 1.8                                             | 1.0E-13                                                | 2.4                                             | 6.5E-12                                                | 2.2                                             | 4.3E-14                                                 | 2.5                                              |
| 424 | PLIN3_HUMAN | PLIN3       | 3.1E-15                                       | 2.7E-06                                    | 1.7E-05                                                | 1.5                                             | 1.3E-06                                                   | 1.6                                             | 1.3E-06                                                | 1.6                                             | 4.4E-06                                                | 1.6                                             | 2.5E-04                                                 | 1.4                                              |
| 425 | PLMN_HUMAN  | PLG         | 2.6E-05                                       | 2.4E-04                                    | 1.5E-04                                                | 0.8                                             | 7.2E-02                                                   | 0.9                                             | 5.5E-03                                                | 0.9                                             | 6.8E-05                                                | 0.8                                             | 1.5E-04                                                 | 0.8                                              |
| 426 | PLOD1_HUMAN | PLOD1       | 2.4E-03                                       | 2.8E-03                                    | 3.0E-04                                                | 0.7                                             | 8.2E-03                                                   | 0.7                                             | 8.0E-03                                                | 0.7                                             | 3.4E-02                                                | 0.8                                             | 5.3E-01                                                 | 0.9                                              |
| 427 | PLSL_HUMAN  | LCPI        | 4.7E-12                                       | 5.2E-01                                    | 7.5E-01                                                | 1.0                                             | 2.1E-01                                                   | 0.8                                             | 4.8E-01                                                | 0.9                                             | 5.1E-01                                                | 0.9                                             | 5.1E-01                                                 | 1.1                                              |
| 428 | PLTP_HUMAN  | PLTP        | 1.0E-02                                       | 4.4E-03                                    | 1.2E-02                                                | 0.8                                             | 1.4E-03                                                   | 0.8                                             | 1.5E-03                                                | 0.8                                             | 7.3E-02                                                | 0.9                                             | 1.0E-03                                                 | 0.8                                              |
| 429 | PNPH_HUMAN  | PNP         | 3.4E-09                                       | 4.6E-11                                    | 2.9E-07                                                | 2.1                                             | 2.0E-09                                                   | 2.5                                             | 2.6E-10                                                | 2.6                                             | 7.2E-11                                                | 2.7                                             | 5.4E-09                                                 | 2.4                                              |
| 430 | PODXL_HUMAN | PODXL       | 2.6E-16                                       | 2.3E-16                                    | 1.3E-01                                                | 0.9                                             | 6.1E-02                                                   | 0.8                                             | 7.2E-01                                                | 1.0                                             | 9.7E-05                                                | 1.4                                             | 3.6E-10                                                 | 1.9                                              |
| 431 | PON1_HUMAN  | PON1        | 2.3E-06                                       | 1.2E-05                                    | 1.4E-04                                                | 1.4                                             | 1.6E-03                                                   | 1.3                                             | 3.6E-02                                                | 1.2                                             | 3.4E-01                                                | 1.1                                             | 3.0E-01                                                 | 0.9                                              |
| 432 | PPIR7_HUMAN | PPP1R7      | 6.4E-09                                       | 1.3E-07                                    | 1.8E-03                                                | 1.6                                             | 8.9E-07                                                   | 2.1                                             | 4.7E-07                                                | 2.2                                             | 2.4E-08                                                | 2.4                                             | 2.4E-04                                                 | 1.7                                              |
| 433 | PPIA_HUMAN  | PPIAL3 PPIA | 2.2E-14                                       | 2.9E-07                                    | 1.9E-05                                                | 1.7                                             | 1.1E-06                                                   | 1.8                                             | 2.4E-07                                                | 1.9                                             | 1.8E-07                                                | 1.9                                             | 2.5E-06                                                 | 1.7                                              |
| 434 | PPIB_HUMAN  | PPIB        | 3.6E-12                                       | 1.5E-06                                    | 7.9E-04                                                | 0.8                                             | 9.8E-02                                                   | 0.9                                             | 4.5E-01                                                | 1.0                                             | 3.5E-02                                                | 1.1                                             | 2.0E-01                                                 | 1.1                                              |
| 435 | PPIC_HUMAN  | PPIC        | 3.3E-03                                       | 1.8E-12                                    | 2.6E-02                                                | 0.8                                             | 9.1E-08                                                   | 0.6                                             | 3.1E-11                                                | 0.5                                             | 5.4E-10                                                | 0.6                                             | 1.6E-09                                                 | 0.6                                              |
| 436 | PRDX1_HUMAN | PRDX1       | 5.0E-12                                       | 5.5E-09                                    | 3.8E-02                                                | 1.3                                             | 3.8E-05                                                   | 1.8                                             | 5.3E-07                                                | 2.1                                             | 7.6E-09                                                | 2.3                                             | 1.9E-07                                                 | 2.1                                              |
| 437 | PRDX2_HUMAN | PRDX2       | 2.0E-10                                       | 3.7E-08                                    | 6.4E-03                                                | 1.5                                             | 1.8E-05                                                   | 1.9                                             | 1.6E-07                                                | 2.2                                             | 1.9E-08                                                | 2.4                                             | 9.8E-07                                                 | 2.1                                              |
| 438 | PRDX4_HUMAN | PRDX4       | 2.5E-12                                       | 7.5E-03                                    | 2.4E-01                                                | 1.2                                             | 2.4E-03                                                   | 1.6                                             | 3.9E-02                                                | 1.4                                             | 1.6E-02                                                | 1.4                                             | 6.9E-04                                                 | 1.7                                              |
| 439 | PRDX5_HUMAN | PRDX5       | 5.0E-11                                       | 7.9E-11                                    | 3.1E-06                                                | 2.0                                             | 2.8E-08                                                   | 2.3                                             | 1.5E-10                                                | 2.6                                             | 2.4E-10                                                | 2.6                                             | 4.2E-09                                                 | 2.4                                              |
| 440 | PRDX6_HUMAN | PRDX6       | 1.0E-10                                       | 5.3E-19                                    | 3.3E-04                                                | 1.6                                             | 5.4E-11                                                   | 2.4                                             | 1.2E-14                                                | 3.0                                             | 3.0E-16                                                | 3.2                                             | 7.5E-16                                                 | 3.2                                              |
| 441 | PROF1_HUMAN | PFN1        | 8.5E-10                                       | 1.7E-04                                    | 3.2E-03                                                | 1.5                                             | 6.1E-04                                                   | 1.6                                             | 1.9E-05                                                | 1.8                                             | 3.3E-05                                                | 1.8                                             | 2.7E-04                                                 | 1.6                                              |
| 442 | PROM1_HUMAN | PROM1       | 2.2E-05                                       | 3.1E-08                                    | 1.0E-03                                                | 0.5                                             | 3.4E-07                                                   | 0.4                                             | 2.7E-06                                                | 0.4                                             | 3.5E-02                                                | 0.7                                             | 4.6E-01                                                 | 1.1                                              |

| No. | Uniprot ID  | Gene symbol | <i>p</i> -value<br>(Subject)<br><sup>a)</sup> | <i>p</i> -value<br>(Time)<br><sup>b)</sup> | <i>p</i> -value<br>(1 mo vs.<br>0 mo)<br><sup>c)</sup> | Ratio<br>(1 mo<br>vs. 0<br>mo)<br><sup>d)</sup> | <i>p</i> -value<br>(3 mo<br>vs. 0<br>mo)<br><sup>c)</sup> | Ratio<br>(3 mo<br>vs. 0<br>mo)<br><sup>d)</sup> | <i>p</i> -value<br>(6 mo vs.<br>0 mo)<br><sup>c)</sup> | Ratio<br>(6 mo<br>vs. 0<br>mo)<br><sup>d)</sup> | <i>p</i> -value<br>(9 mo vs.<br>0 mo)<br><sup>c)</sup> | Ratio<br>(9 mo<br>vs. 0<br>mo)<br><sup>d)</sup> | <i>p</i> -value<br>(12 mo vs.<br>0 mo)<br><sup>c)</sup> | Ratio<br>(12 mo<br>vs. 0<br>mo)<br><sup>d)</sup> |
|-----|-------------|-------------|-----------------------------------------------|--------------------------------------------|--------------------------------------------------------|-------------------------------------------------|-----------------------------------------------------------|-------------------------------------------------|--------------------------------------------------------|-------------------------------------------------|--------------------------------------------------------|-------------------------------------------------|---------------------------------------------------------|--------------------------------------------------|
| 443 | PROM2_HUMAN | PROM2       | 1.0E-04                                       | 3.0E-06                                    | 2.8E-04                                                | 0.6                                             | 2.5E-06                                                   | 0.5                                             | 2.9E-06                                                | 0.5                                             | 4.8E-04                                                | 0.6                                             | 7.8E-05                                                 | 0.6                                              |
| 444 | PRPS2_HUMAN | PRPS2       | 3.8E-07                                       | 6.2E-08                                    | 2.4E-07                                                | 2.4                                             | 5.6E-07                                                   | 2.3                                             | 3.2E-08                                                | 2.6                                             | 8.4E-07                                                | 2.3                                             | 2.5E-04                                                 | 1.8                                              |
| 445 | PRSS8_HUMAN | PRSS8       | 1.9E-01                                       | 1.1E-07                                    | 2.9E-05                                                | 0.8                                             | 1.1E-07                                                   | 0.7                                             | 3.3E-08                                                | 0.7                                             | 3.3E-04                                                | 0.8                                             | 8.6E-03                                                 | 0.9                                              |
| 446 | PSA1_HUMAN  | PSMA1       | 6.5E-13                                       | 3.5E-06                                    | 7.0E-02                                                | 1.4                                             | 2.4E-03                                                   | 1.7                                             | 2.2E-05                                                | 2.1                                             | 1.3E-06                                                | 2.4                                             | 1.5E-05                                                 | 2.2                                              |
| 447 | PSA2_HUMAN  | PSMA2       | 9.4E-07                                       | 7.3E-07                                    | 4.1E-01                                                | 1.1                                             | 2.6E-02                                                   | 1.4                                             | 7.2E-06                                                | 2.1                                             | 1.0E-05                                                | 2.0                                             | 5.6E-06                                                 | 2.1                                              |
| 448 | PSA3_HUMAN  | PSMA3       | 2.0E-08                                       | 2.2E-05                                    | 6.5E-02                                                | 1.4                                             | 8.4E-04                                                   | 1.8                                             | 2.5E-05                                                | 2.1                                             | 5.3E-06                                                | 2.3                                             | 2.1E-04                                                 | 1.9                                              |
| 449 | PSA4_HUMAN  | PSMA4       | 3.4E-11                                       | 2.2E-06                                    | 1.0E-03                                                | 1.7                                             | 3.0E-05                                                   | 2.0                                             | 1.7E-06                                                | 2.2                                             | 3.6E-07                                                | 2.3                                             | 1.8E-05                                                 | 2.0                                              |
| 450 | PSA5_HUMAN  | PSMA5       | 4.8E-07                                       | 3.6E-05                                    | 7.5E-02                                                | 1.4                                             | 5.3E-03                                                   | 1.7                                             | 1.8E-04                                                | 2.0                                             | 6.2E-06                                                | 2.4                                             | 6.7E-05                                                 | 2.1                                              |
| 451 | PSA6_HUMAN  | PSMA6       | 9.7E-11                                       | 1.2E-06                                    | 2.4E-02                                                | 1.5                                             | 1.5E-03                                                   | 1.7                                             | 6.0E-06                                                | 2.2                                             | 3.4E-07                                                | 2.5                                             | 4.5E-06                                                 | 2.2                                              |
| 452 | PSA7_HUMAN  | PSMA7       | 1.4E-09                                       | 1.8E-07                                    | 9.8E-02                                                | 1.3                                             | 2.4E-03                                                   | 1.6                                             | 1.6E-05                                                | 2.0                                             | 2.0E-07                                                | 2.4                                             | 1.2E-06                                                 | 2.3                                              |
| 453 | PSA_HUMAN   | NPEPPS      | 6.1E-10                                       | 6.1E-04                                    | 3.6E-03                                                | 1.7                                             | 8.9E-05                                                   | 2.0                                             | 5.7E-05                                                | 2.1                                             | 1.0E-03                                                | 1.8                                             | 7.8E-03                                                 | 1.6                                              |
| 454 | PSB1_HUMAN  | PSMB1       | 3.0E-09                                       | 2.3E-06                                    | 3.1E-01                                                | 1.2                                             | 3.1E-03                                                   | 1.6                                             | 1.8E-04                                                | 1.8                                             | 1.8E-05                                                | 2.0                                             | 1.8E-06                                                 | 2.3                                              |
| 455 | PSB2_HUMAN  | PSMB2       | 1.5E-07                                       | 1.8E-03                                    | 3.7E-01                                                | 1.2                                             | 7.7E-03                                                   | 1.8                                             | 2.6E-03                                                | 1.9                                             | 6.6E-04                                                | 2.1                                             | 1.5E-03                                                 | 2.0                                              |
| 456 | PSB4_HUMAN  | PSMB4       | 3.6E-03                                       | 9.6E-03                                    | 5.1E-01                                                | 1.2                                             | 4.0E-01                                                   | 1.2                                             | 3.3E-02                                                | 1.6                                             | 1.7E-03                                                | 2.1                                             | 5.9E-03                                                 | 1.9                                              |
| 457 | PSB6_HUMAN  | PSMB6       | 2.4E-11                                       | 5.9E-07                                    | 1.4E-01                                                | 1.3                                             | 7.3E-04                                                   | 1.8                                             | 3.6E-05                                                | 2.1                                             | 5.3E-07                                                | 2.5                                             | 3.3E-06                                                 | 2.3                                              |
| 458 | PSB8_HUMAN  | PSMB8       | 7.9E-01                                       | 5.8E-04                                    | 7.5E-01                                                | 1.1                                             | 2.6E-02                                                   | 1.4                                             | 1.3E-02                                                | 1.5                                             | 1.0E-04                                                | 2.0                                             | 2.4E-03                                                 | 1.7                                              |
| 459 | PSCA_HUMAN  | PSCA        | 2.4E-03                                       | 6.8E-20                                    | 1.0E-07                                                | 0.6                                             | 5.2E-16                                                   | 0.4                                             | 1.6E-19                                                | 0.3                                             | 8.5E-17                                                | 0.3                                             | 1.2E-15                                                 | 0.3                                              |
| 460 | PSMD1_HUMAN | PSMD1       | 7.2E-03                                       | 2.8E-03                                    | 2.5E-01                                                | 1.2                                             | 1.9E-02                                                   | 1.6                                             | 4.8E-03                                                | 1.7                                             | 9.0E-04                                                | 1.9                                             | 5.8E-04                                                 | 2.0                                              |
| 461 | PSME1_HUMAN | PSME1       | 9.9E-06                                       | 1.6E-04                                    | 2.4E-02                                                | 1.5                                             | 8.2E-04                                                   | 1.8                                             | 1.2E-04                                                | 2.0                                             | 7.2E-06                                                | 2.2                                             | 1.8E-03                                                 | 1.7                                              |
| 462 | PSME2_HUMAN | PSME2       | 2.4E-01                                       | 9.7E-03                                    | 7.5E-01                                                | 0.9                                             | 9.7E-02                                                   | 1.4                                             | 4.0E-02                                                | 1.5                                             | 7.9E-03                                                | 1.7                                             | 1.7E-02                                                 | 1.6                                              |
| 463 | PTGR1_HUMAN | PTGR1       | 4.1E-05                                       | 4.0E-09                                    | 1.8E-05                                                | 1.7                                             | 4.9E-06                                                   | 1.8                                             | 9.4E-09                                                | 2.1                                             | 9.1E-08                                                | 2.0                                             | 3.2E-09                                                 | 2.2                                              |
| 464 | PTHR_HUMAN  | PTHLH       | 3.8E-03                                       | 2.8E-04                                    | 9.1E-02                                                | 1.4                                             | 8.2E-03                                                   | 1.7                                             | 5.8E-05                                                | 2.3                                             | 6.4E-05                                                | 2.3                                             | 2.3E-03                                                 | 1.8                                              |
| 465 | PTPRF_HUMAN | PTPRF       | 1.1E-02                                       | 3.9E-04                                    | 8.6E-04                                                | 0.7                                             | 1.0E-04                                                   | 0.6                                             | 3.5E-04                                                | 0.7                                             | 2.6E-02                                                | 0.8                                             | 2.1E-01                                                 | 0.9                                              |
| 466 | PUR6_HUMAN  | PAICS       | 5.4E-06                                       | 1.3E-03                                    | 2.8E-01                                                | 1.2                                             | 2.5E-02                                                   | 1.5                                             | 1.1E-01                                                | 1.4                                             | 1.9E-03                                                | 1.8                                             | 7.5E-05                                                 | 2.4                                              |
| 467 | PYGB_HUMAN  | PYGB        | 8.2E-10                                       | 9.3E-13                                    | 2.1E-01                                                | 1.2                                             | 5.4E-04                                                   | 1.6                                             | 3.1E-07                                                | 2.0                                             | 1.6E-10                                                | 2.5                                             | 6.8E-11                                                 | 2.6                                              |
| 468 | PYGL_HUMAN  | PYGL        | 2.2E-08                                       | 7.7E-12                                    | 5.2E-03                                                | 1.5                                             | 1.4E-07                                                   | 2.2                                             | 2.1E-09                                                | 2.4                                             | 3.5E-10                                                | 2.6                                             | 5.9E-11                                                 | 2.7                                              |
| 469 | PZP_HUMAN   | PZP         | 1.5E-05                                       | 4.4E-09                                    | 7.6E-05                                                | 0.6                                             | 5.0E-07                                                   | 0.5                                             | 2.8E-06                                                | 0.5                                             | 5.0E-09                                                | 0.5                                             | 4.4E-09                                                 | 0.5                                              |
| 470 | QSOX1_HUMAN | QSOX1       | 3.0E-16                                       | 2.0E-14                                    | 1.0E-06                                                | 0.8                                             | 4.9E-13                                                   | 0.7                                             | 4.2E-13                                                | 0.7                                             | 1.5E-06                                                | 0.8                                             | 1.2E-02                                                 | 0.9                                              |
| 471 | RAB10_HUMAN | RAB10       | 1.1E-08                                       | 2.3E-04                                    | 1.3E-03                                                | 1.4                                             | 5.2E-04                                                   | 1.4                                             | 1.1E-05                                                | 1.6                                             | 1.0E-02                                                | 1.3                                             | 7.6E-02                                                 | 1.2                                              |
| 472 | RAB14_HUMAN | RAB14       | 7.9E-06                                       | 4.5E-07                                    | 4.4E-03                                                | 1.3                                             | 7.7E-06                                                   | 1.6                                             | 2.1E-07                                                | 1.7                                             | 1.3E-06                                                | 1.7                                             | 6.9E-06                                                 | 1.6                                              |
| 473 | RAB18_HUMAN | RAB18       | 6.7E-14                                       | 2.5E-02                                    | 3.4E-03                                                | 0.8                                             | 1.0E-01                                                   | 0.9                                             | 9.6E-01                                                | 1.0                                             | 2.1E-01                                                | 0.9                                             | 4.9E-02                                                 | 0.9                                              |
| 474 | RAB1A_HUMAN | RAB1A       | 5.8E-14                                       | 8.8E-08                                    | 2.0E-05                                                | 1.4                                             | 4.0E-07                                                   | 1.5                                             | 2.3E-09                                                | 1.7                                             | 1.4E-05                                                | 1.4                                             | 4.8E-05                                                 | 1.4                                              |
| 475 | RAB1B_HUMAN | RAB1B       | 1.1E-02                                       | 2.0E-03                                    | 9.2E-03                                                | 1.2                                             | 8.0E-04                                                   | 1.3                                             | 7.6E-05                                                | 1.3                                             | 2.6E-02                                                | 1.2                                             | 3.5E-02                                                 | 1.2                                              |
| 476 | RAB2A_HUMAN | RAB2A       | 1.1E-09                                       | 1.1E-05                                    | 2.9E-02                                                | 1.2                                             | 2.2E-04                                                   | 1.3                                             | 3.3E-07                                                | 1.5                                             | 8.3E-03                                                | 1.2                                             | 1.2E-04                                                 | 1.4                                              |
| 477 | RAB2B_HUMAN | RAB2B       | 1.7E-03                                       | 1.9E-01                                    | 1.7E-01                                                | 1.2                                             | 1.4E-01                                                   | 1.2                                             | 2.3E-02                                                | 1.3                                             | 2.9E-02                                                | 1.3                                             | 2.8E-01                                                 | 1.1                                              |
| 478 | RAB35_HUMAN | RAB35       | 9.4E-03                                       | 6.5E-01                                    | 2.3E-01                                                | 1.1                                             | 2.1E-01                                                   | 1.1                                             | 1.6E-01                                                | 1.1                                             | 3.1E-01                                                | 1.1                                             | 7.6E-01                                                 | 1.0                                              |

| No. | Uniprot ID  | Gene symbol                                   | <i>p</i> -value<br>(Subject)<br><sup>a)</sup> | <i>p</i> -value<br>(Time)<br><sup>b)</sup> | <i>p</i> -value<br>(1 mo vs.<br>0 mo)<br><sup>c)</sup> | Ratio<br>(1 mo<br>vs. 0<br>mo)<br><sup>d)</sup> | <i>p</i> -value<br>(3 mo<br>vs. 0<br>mo)<br><sup>c)</sup> | Ratio<br>(3 mo<br>vs. 0<br>mo)<br><sup>d)</sup> | <i>p</i> -value<br>(6 mo vs.<br>0 mo)<br><sup>c)</sup> | Ratio<br>(6 mo<br>vs. 0<br>mo)<br><sup>d)</sup> | <i>p</i> -value<br>(9 mo vs.<br>0 mo)<br><sup>c)</sup> | Ratio<br>(9 mo<br>vs. 0<br>mo)<br><sup>d)</sup> | <i>p</i> -value<br>(12 mo vs.<br>0 mo)<br><sup>c)</sup> | Ratio<br>(12 mo<br>vs. 0<br>mo)<br><sup>d)</sup> |
|-----|-------------|-----------------------------------------------|-----------------------------------------------|--------------------------------------------|--------------------------------------------------------|-------------------------------------------------|-----------------------------------------------------------|-------------------------------------------------|--------------------------------------------------------|-------------------------------------------------|--------------------------------------------------------|-------------------------------------------------|---------------------------------------------------------|--------------------------------------------------|
| 479 | RAB5A_HUMAN | RAB5A                                         | 5.8E-08                                       | 2.3E-03                                    | 1.9E-01                                                | 1.1                                             | 2.0E-03                                                   | 1.3                                             | 1.2E-03                                                | 1.3                                             | 5.5E-01                                                | 1.0                                             | 7.0E-01                                                 | 1.0                                              |
| 480 | RAB5B_HUMAN | RAB5B                                         | 8.4E-07                                       | 1.1E-04                                    | 1.5E-01                                                | 1.1                                             | 2.7E-04                                                   | 1.3                                             | 7.3E-06                                                | 1.4                                             | 3.1E-02                                                | 1.2                                             | 8.7E-02                                                 | 1.1                                              |
| 481 | RAB5C_HUMAN | RAB5C                                         | 8.5E-09                                       | 4.4E-03                                    | 8.5E-02                                                | 1.1                                             | 6.1E-03                                                   | 1.2                                             | 2.2E-03                                                | 1.3                                             | 9.9E-01                                                | 1.0                                             | 5.0E-01                                                 | 1.1                                              |
| 482 | RAB6A_HUMAN | RAB6A<br>RAB6C                                | 3.5E-02                                       | 1.6E-03                                    | 8.2E-02                                                | 1.1                                             | 2.3E-03                                                   | 1.2                                             | 2.2E-04                                                | 1.3                                             | 7.7E-04                                                | 1.3                                             | 2.4E-03                                                 | 1.2                                              |
| 483 | RAB7A_HUMAN | RAB7A                                         | 1.7E-09                                       | 1.7E-03                                    | 3.7E-01                                                | 0.9                                             | 3.6E-01                                                   | 0.9                                             | 3.4E-01                                                | 0.9                                             | 2.2E-02                                                | 0.8                                             | 9.7E-05                                                 | 0.7                                              |
| 484 | RAB8A_HUMAN | RAB8A                                         | 8.5E-01                                       | 1.9E-02                                    | 6.8E-02                                                | 1.1                                             | 5.0E-03                                                   | 1.2                                             | 9.7E-04                                                | 1.3                                             | 4.7E-02                                                | 1.1                                             | 1.4E-01                                                 | 1.1                                              |
| 485 | RABP1_HUMAN | CRABP1                                        | 3.9E-07                                       | 1.4E-05                                    | 4.4E-05                                                | 3.4                                             | 3.0E-03                                                   | 2.3                                             | 6.4E-02                                                | 1.7                                             | 6.7E-01                                                | 0.9                                             | 7.9E-01                                                 | 0.9                                              |
| 486 | RABP2_HUMAN | CRABP2                                        | 1.1E-18                                       | 1.7E-18                                    | 2.5E-07                                                | 1.9                                             | 1.8E-12                                                   | 2.5                                             | 8.5E-16                                                | 3.0                                             | 4.2E-16                                                | 3.1                                             | 1.6E-16                                                 | 3.1                                              |
| 487 | RAC1_HUMAN  | RAC1                                          | 1.4E-10                                       | 1.5E-02                                    | 1.3E-01                                                | 1.1                                             | 2.7E-02                                                   | 1.2                                             | 6.8E-04                                                | 1.3                                             | 2.2E-02                                                | 1.2                                             | 4.8E-03                                                 | 1.3                                              |
| 488 | RADI_HUMAN  | RDX                                           | 1.4E-10                                       | 5.4E-02                                    | 6.4E-02                                                | 1.2                                             | 1.7E-02                                                   | 1.3                                             | 5.7E-03                                                | 1.3                                             | 9.6E-03                                                | 1.3                                             | 1.1E-02                                                 | 1.3                                              |
| 489 | RALA_HUMAN  | RALA                                          | 5.6E-03                                       | 4.4E-01                                    | 6.6E-01                                                | 1.0                                             | 2.8E-01                                                   | 0.9                                             | 3.3E-01                                                | 0.9                                             | 6.2E-02                                                | 0.9                                             | 1.1E-01                                                 | 0.9                                              |
| 490 | RAN_HUMAN   | RAN                                           | 4.5E-03                                       | 1.6E-02                                    | 2.1E-01                                                | 1.2                                             | 2.8E-02                                                   | 1.4                                             | 2.6E-03                                                | 1.7                                             | 4.3E-03                                                | 1.6                                             | 6.8E-03                                                 | 1.6                                              |
| 491 | RAP1A_HUMAN | RAP1A                                         | 5.6E-05                                       | 2.0E-02                                    | 1.9E-02                                                | 1.2                                             | 5.7E-02                                                   | 1.2                                             | 3.7E-02                                                | 1.2                                             | 8.4E-01                                                | 1.0                                             | 6.3E-01                                                 | 1.0                                              |
| 492 | RAP1B_HUMAN | RAP1B                                         | 5.1E-02                                       | 1.2E-01                                    | 7.7E-02                                                | 1.1                                             | 3.3E-02                                                   | 1.1                                             | 1.3E-02                                                | 1.1                                             | 1.4E-01                                                | 1.1                                             | 4.8E-01                                                 | 1.0                                              |
| 493 | RB11A_HUMAN | RAB11A                                        | 2.9E-02                                       | 5.2E-10                                    | 1.1E-04                                                | 1.4                                             | 2.0E-08                                                   | 1.8                                             | 1.2E-11                                                | 2.1                                             | 7.2E-06                                                | 1.5                                             | 2.3E-05                                                 | 1.5                                              |
| 494 | RB11B_HUMAN | RAB11B                                        | 7.9E-02                                       | 7.0E-04                                    | 5.3E-02                                                | 1.1                                             | 5.0E-03                                                   | 1.2                                             | 1.0E-03                                                | 1.2                                             | 7.3E-05                                                | 1.3                                             | 3.4E-04                                                 | 1.2                                              |
| 495 | RD23A_HUMAN | RAD23A                                        | 6.2E-07                                       | 1.5E-10                                    | 9.3E-03                                                | 1.5                                             | 1.1E-04                                                   | 1.8                                             | 9.6E-10                                                | 2.8                                             | 2.2E-10                                                | 3.0                                             | 2.2E-07                                                 | 2.3                                              |
| 496 | RD23B_HUMAN | RAD23B                                        | 1.2E-09                                       | 2.5E-12                                    | 2.1E-03                                                | 1.5                                             | 1.8E-06                                                   | 1.9                                             | 1.1E-09                                                | 2.4                                             | 8.3E-12                                                | 2.7                                             | 1.8E-10                                                 | 2.5                                              |
| 497 | RET1_HUMAN  | RBP1                                          | 1.0E-07                                       | 1.5E-03                                    | 7.9E-02                                                | 1.3                                             | 2.2E-02                                                   | 1.4                                             | 1.8E-05                                                | 2.0                                             | 2.7E-02                                                | 1.4                                             | 9.6E-02                                                 | 1.3                                              |
| 498 | RET4_HUMAN  | RBP4                                          | 3.2E-02                                       | 3.8E-01                                    | 6.0E-01                                                | 1.0                                             | 2.0E-01                                                   | 1.1                                             | 9.1E-01                                                | 1.0                                             | 3.4E-01                                                | 0.9                                             | 8.5E-01                                                 | 1.0                                              |
| 499 | RHG18_HUMAN | ARHGAP18                                      | 6.8E-09                                       | 2.9E-17                                    | 4.7E-06                                                | 2.2                                             | 5.0E-13                                                   | 4.2                                             | 3.6E-15                                                | 5.1                                             | 2.3E-15                                                | 5.2                                             | 4.3E-14                                                 | 4.6                                              |
| 500 | RHOA_HUMAN  | RHOA                                          | 6.2E-08                                       | 5.2E-06                                    | 7.8E-05                                                | 1.4                                             | 1.1E-06                                                   | 1.5                                             | 2.4E-06                                                | 1.5                                             | 1.1E-04                                                | 1.4                                             | 6.9E-03                                                 | 1.2                                              |
| 501 | RHOC_HUMAN  | RHOC                                          | 1.5E-02                                       | 1.0E-03                                    | 1.3E-03                                                | 1.4                                             | 2.0E-04                                                   | 1.5                                             | 1.2E-03                                                | 1.4                                             | 4.7E-04                                                | 1.4                                             | 6.4E-03                                                 | 1.3                                              |
| 502 | RINI_HUMAN  | RNH1                                          | 3.3E-02                                       | 1.5E-03                                    | 9.4E-02                                                | 1.5                                             | 2.7E-03                                                   | 2.0                                             | 1.5E-04                                                | 2.5                                             | 1.3E-03                                                | 2.1                                             | 1.7E-03                                                 | 2.1                                              |
| 503 | RISC_HUMAN  | SCPEP1                                        | 9.5E-20                                       | 1.4E-05                                    | 5.5E-01                                                | 0.9                                             | 2.6E-01                                                   | 1.1                                             | 6.6E-02                                                | 1.2                                             | 1.1E-03                                                | 1.4                                             | 7.2E-05                                                 | 1.5                                              |
| 504 | RNAS4_HUMAN | RNASE4                                        | 6.2E-09                                       | 4.4E-07                                    | 4.1E-05                                                | 1.5                                             | 1.3E-06                                                   | 1.7                                             | 4.6E-08                                                | 1.9                                             | 9.6E-06                                                | 1.6                                             | 2.0E-03                                                 | 1.4                                              |
| 505 | RNT2_HUMAN  | RNAS2T2                                       | 1.8E-10                                       | 3.5E-06                                    | 1.5E-07                                                | 0.6                                             | 8.3E-05                                                   | 0.7                                             | 5.5E-03                                                | 0.7                                             | 1.3E-01                                                | 0.9                                             | 6.2E-02                                                 | 0.8                                              |
| 506 | RRAS_HUMAN  | RRAS                                          | 2.3E-01                                       | 2.7E-03                                    | 6.3E-02                                                | 1.2                                             | 2.6E-03                                                   | 1.3                                             | 7.7E-04                                                | 1.4                                             | 7.1E-03                                                | 1.3                                             | 3.4E-04                                                 | 1.4                                              |
| 507 | RRBP1_HUMAN | RRBP1                                         | 3.3E-11                                       | 4.1E-20                                    | 3.1E-03                                                | 1.3                                             | 8.3E-10                                                   | 2.0                                             | 1.7E-13                                                | 2.3                                             | 7.8E-15                                                | 2.5                                             | 4.7E-19                                                 | 3.0                                              |
| 508 | RS12_HUMAN  | RPS12P11<br>RPS12P4<br>RPS12P9<br>RPS12       | 9.0E-04                                       | 6.9E-01                                    | 4.9E-01                                                | 1.1                                             | 2.1E-01                                                   | 1.1                                             | 6.7E-01                                                | 1.0                                             | 2.0E-01                                                | 1.1                                             | 1.8E-01                                                 | 1.1                                              |
| 509 | RS27A_HUMAN | RPS27A<br>RPS27AP11<br>RPS27AP12<br>RPS27AP16 | 3.4E-09                                       | 6.3E-08                                    | 2.3E-01                                                | 1.1                                             | 2.6E-02                                                   | 1.2                                             | 7.3E-06                                                | 1.4                                             | 4.4E-06                                                | 1.5                                             | 1.3E-07                                                 | 1.6                                              |

| No. | Uniprot ID  | Gene symbol          | <i>p</i> -value<br>(Subject)<br><i>a)</i> | <i>p</i> -value<br>(Time)<br><i>b)</i> | <i>p</i> -value<br>(1 mo vs.<br>0 mo)<br><i>c)</i> | Ratio<br>(1 mo<br>vs. 0<br>mo)<br><i>d)</i> | <i>p</i> -value<br>(3 mo<br>vs. 0<br>mo)<br><i>c)</i> | Ratio<br>(3 mo<br>vs. 0<br>mo)<br><i>d)</i> | <i>p</i> -value<br>(6 mo vs.<br>0 mo)<br><i>c)</i> | Ratio<br>(6 mo<br>vs. 0<br>mo)<br><i>d)</i> | <i>p</i> -value<br>(9 mo vs.<br>0 mo)<br><i>c)</i> | Ratio<br>(9 mo<br>vs. 0<br>mo)<br><i>d)</i> | <i>p</i> -value<br>(12 mo vs.<br>0 mo)<br><i>c)</i> | Ratio<br>(12 mo<br>vs. 0<br>mo)<br><i>d)</i> |
|-----|-------------|----------------------|-------------------------------------------|----------------------------------------|----------------------------------------------------|---------------------------------------------|-------------------------------------------------------|---------------------------------------------|----------------------------------------------------|---------------------------------------------|----------------------------------------------------|---------------------------------------------|-----------------------------------------------------|----------------------------------------------|
|     |             | UBB UBC<br>UBA52     |                                           |                                        |                                                    |                                             |                                                       |                                             |                                                    |                                             |                                                    |                                             |                                                     |                                              |
| 510 | S10A1_HUMAN | S100A1               | 1.2E-10                                   | 2.5E-13                                | 4.9E-04                                            | 1.7                                         | 1.3E-07                                               | 2.2                                         | 1.5E-11                                            | 3.0                                         | 3.1E-12                                            | 3.1                                         | 2.9E-11                                             | 2.9                                          |
| 511 | S10AB_HUMAN | S100A11<br>S100A11P1 | 4.2E-10                                   | 7.2E-15                                | 1.1E-02                                            | 1.4                                         | 3.2E-06                                               | 2.0                                         | 3.2E-10                                            | 2.6                                         | 6.7E-12                                            | 2.9                                         | 8.0E-14                                             | 3.3                                          |
| 512 | S10AD_HUMAN | S100A13              | 9.4E-07                                   | 1.2E-07                                | 4.2E-04                                            | 1.4                                         | 1.4E-06                                               | 1.7                                         | 6.9E-07                                            | 1.7                                         | 2.2E-06                                            | 1.6                                         | 7.7E-08                                             | 1.8                                          |
| 513 | S10AG_HUMAN | S100A16              | 3.0E-01                                   | 4.3E-03                                | 6.0E-02                                            | 1.3                                         | 3.1E-03                                               | 1.4                                         | 3.0E-03                                            | 1.4                                         | 1.8E-02                                            | 1.4                                         | 6.6E-04                                             | 1.6                                          |
| 514 | S38AA_HUMAN | SLC38A10             | 1.9E-08                                   | 4.4E-01                                | 1.7E-01                                            | 1.1                                         | 8.2E-02                                               | 1.1                                         | 7.7E-02                                            | 1.1                                         | 4.9E-01                                            | 1.0                                         | 3.9E-01                                             | 1.1                                          |
| 515 | SAHH_HUMAN  | AHCY                 | 3.2E-09                                   | 2.9E-01                                | 5.0E-01                                            | 1.1                                         | 4.5E-02                                               | 1.4                                         | 8.5E-02                                            | 1.3                                         | 6.8E-02                                            | 1.3                                         | 1.5E-01                                             | 1.3                                          |
| 516 | SAP3_HUMAN  | GM2A                 | 1.6E-11                                   | 1.4E-09                                | 1.1E-01                                            | 1.1                                         | 3.6E-03                                               | 0.8                                         | 1.4E-05                                            | 0.8                                         | 9.3E-06                                            | 0.8                                         | 8.0E-05                                             | 0.8                                          |
| 517 | SAP_HUMAN   | PSAP                 | 2.5E-19                                   | 1.1E-13                                | 4.6E-01                                            | 1.1                                         | 6.7E-05                                               | 1.4                                         | 9.2E-09                                            | 1.6                                         | 2.8E-11                                            | 1.8                                         | 6.2E-09                                             | 1.6                                          |
| 518 | SAR1A_HUMAN | SAR1A                | 7.6E-11                                   | 6.9E-13                                | 1.0E-04                                            | 1.5                                         | 3.4E-12                                               | 2.3                                         | 7.4E-13                                            | 2.4                                         | 1.8E-08                                            | 1.9                                         | 9.5E-07                                             | 1.7                                          |
| 519 | SAR1B_HUMAN | SAR1B                | 2.7E-01                                   | 8.1E-06                                | 2.6E-03                                            | 1.3                                         | 4.9E-06                                               | 1.5                                         | 2.5E-06                                            | 1.5                                         | 2.1E-05                                            | 1.5                                         | 1.2E-04                                             | 1.4                                          |
| 520 | SAST_HUMAN  | OLAH                 | 1.9E-10                                   | 1.9E-08                                | 3.2E-05                                            | 1.9                                         | 5.3E-07                                               | 2.2                                         | 1.6E-09                                            | 2.7                                         | 1.6E-07                                            | 2.3                                         | 1.8E-06                                             | 2.1                                          |
| 521 | SBP1_HUMAN  | SELENBP1             | 1.5E-10                                   | 8.3E-01                                | 9.9E-01                                            | 1.0                                         | 2.8E-01                                               | 0.9                                         | 5.3E-01                                            | 0.9                                         | 9.4E-01                                            | 1.0                                         | 8.5E-01                                             | 1.0                                          |
| 522 | SDC2_HUMAN  | SDC2                 | 4.9E-01                                   | 1.1E-01                                | 7.2E-02                                            | 1.1                                         | 5.9E-03                                               | 1.1                                         | 4.6E-02                                            | 1.1                                         | 9.3E-02                                            | 1.1                                         | 2.8E-01                                             | 1.1                                          |
| 523 | SDC4_HUMAN  | SDC4                 | 2.7E-09                                   | 3.7E-02                                | 7.0E-01                                            | 1.0                                         | 4.7E-01                                               | 0.9                                         | 2.4E-03                                            | 0.7                                         | 7.7E-02                                            | 0.8                                         | 2.5E-01                                             | 0.9                                          |
| 524 | SDCB1_HUMAN | SDCBP                | 1.4E-02                                   | 1.4E-06                                | 2.0E-04                                            | 0.6                                         | 1.2E-04                                               | 0.6                                         | 2.4E-07                                            | 0.5                                         | 1.0E-04                                            | 0.6                                         | 3.0E-01                                             | 0.9                                          |
| 525 | SEPP1_HUMAN | SEPP1                | 8.9E-08                                   | 4.7E-08                                | 3.5E-05                                            | 0.6                                         | 3.4E-07                                               | 0.6                                         | 1.1E-05                                            | 0.6                                         | 2.5E-03                                            | 0.7                                         | 8.8E-01                                             | 1.0                                          |
| 526 | SERA_HUMAN  | PHGDH                | 8.4E-04                                   | 1.3E-10                                | 1.9E-01                                            | 1.3                                         | 2.9E-04                                               | 2.0                                         | 5.8E-06                                            | 2.5                                         | 6.4E-10                                            | 3.8                                         | 3.8E-09                                             | 3.5                                          |
| 527 | SFRP1_HUMAN | SFRP1                | 3.9E-01                                   | 8.1E-05                                | 2.3E-02                                            | 0.7                                         | 1.1E-03                                               | 0.6                                         | 1.8E-04                                            | 0.6                                         | 3.7E-05                                            | 0.6                                         | 2.7E-05                                             | 0.6                                          |
| 528 | SH3L3_HUMAN | SH3BGR13             | 1.0E-06                                   | 1.9E-03                                | 1.5E-03                                            | 1.6                                         | 1.4E-03                                               | 1.6                                         | 1.6E-04                                            | 1.7                                         | 2.9E-03                                            | 1.5                                         | 3.9E-03                                             | 1.5                                          |
| 529 | SHOT1_HUMAN | KIAA1598             | 3.1E-01                                   | 4.9E-03                                | 1.7E-01                                            | 1.2                                         | 2.7E-02                                               | 1.3                                         | 1.5E-03                                            | 1.4                                         | 1.6E-02                                            | 1.3                                         | 4.0E-04                                             | 1.5                                          |
| 530 | SHPS1_HUMAN | SIRPA                | 1.9E-04                                   | 1.5E-20                                | 2.1E-01                                            | 1.1                                         | 7.9E-05                                               | 1.3                                         | 1.6E-08                                            | 1.4                                         | 1.3E-14                                            | 1.7                                         | 1.1E-18                                             | 1.9                                          |
| 531 | SIAE_HUMAN  | SIAE                 | 9.4E-08                                   | 1.1E-07                                | 1.0E-06                                            | 0.7                                         | 2.1E-08                                               | 0.6                                         | 6.6E-07                                            | 0.7                                         | 3.5E-06                                            | 0.7                                         | 2.3E-05                                             | 0.7                                          |
| 532 | SIAS_HUMAN  | NANS                 | 2.5E-04                                   | 4.3E-03                                | 4.1E-02                                            | 2.0                                         | 3.3E-03                                               | 2.9                                         | 3.2E-03                                            | 2.9                                         | 3.7E-04                                            | 3.7                                         | 3.1E-03                                             | 3.0                                          |
| 533 | SIL1_HUMAN  | SIL1                 | 1.7E-13                                   | 4.8E-25                                | 1.1E-08                                            | 0.7                                         | 3.0E-15                                               | 0.6                                         | 6.1E-20                                            | 0.6                                         | 2.3E-22                                            | 0.6                                         | 4.9E-22                                             | 0.6                                          |
| 534 | SND1_HUMAN  | SND1                 | 1.7E-02                                   | 2.2E-01                                | 1.3E-01                                            | 1.2                                         | 3.4E-02                                               | 1.2                                         | 5.8E-02                                            | 1.2                                         | 1.1E-01                                            | 1.2                                         | 2.6E-02                                             | 1.2                                          |
| 535 | SNP23_HUMAN | SNAP23               | 4.1E-05                                   | 5.2E-08                                | 9.6E-02                                            | 1.3                                         | 2.1E-05                                               | 2.3                                         | 3.8E-07                                            | 2.8                                         | 7.7E-05                                            | 2.1                                         | 4.8E-08                                             | 3.1                                          |
| 536 | SODC_HUMAN  | SOD1                 | 9.2E-12                                   | 8.9E-08                                | 8.6E-06                                            | 1.8                                         | 7.2E-07                                               | 2.0                                         | 5.6E-07                                            | 2.0                                         | 2.6E-08                                            | 2.2                                         | 2.2E-06                                             | 1.9                                          |
| 537 | SOSD1_HUMAN | SOSTDC1              | 1.2E-06                                   | 2.8E-03                                | 1.4E-01                                            | 0.8                                         | 2.0E-03                                               | 0.6                                         | 6.6E-02                                            | 0.7                                         | 1.0E-04                                            | 0.5                                         | 4.7E-02                                             | 0.7                                          |
| 538 | SP2_HUMAN   | SP2                  | 7.6E-01                                   | 1.9E-02                                | 1.0E-02                                            | 0.9                                         | 3.0E-02                                               | 0.9                                         | 7.7E-03                                            | 0.9                                         | 9.3E-02                                            | 0.9                                         | 9.1E-01                                             | 1.0                                          |
| 539 | SPIT1_HUMAN | SPINT1               | 2.1E-03                                   | 2.6E-03                                | 5.6E-03                                            | 1.2                                         | 3.5E-04                                               | 1.2                                         | 2.9E-04                                            | 1.2                                         | 2.1E-02                                            | 1.1                                         | 1.8E-03                                             | 1.2                                          |
| 540 | SPIT2_HUMAN | SPINT2               | 1.9E-01                                   | 1.0E-02                                | 3.9E-02                                            | 1.1                                         | 9.0E-04                                               | 1.2                                         | 4.1E-03                                            | 1.1                                         | 5.3E-03                                            | 1.1                                         | 6.4E-03                                             | 1.1                                          |
| 541 | SRC8_HUMAN  | CTTN                 | 5.1E-05                                   | 8.7E-08                                | 9.2E-02                                            | 1.4                                         | 1.3E-03                                               | 1.9                                         | 2.4E-05                                            | 2.3                                         | 5.8E-08                                            | 3.2                                         | 2.9E-07                                             | 2.9                                          |
| 542 | ST14_HUMAN  | ST14                 | 1.8E-03                                   | 3.8E-01                                | 5.7E-01                                            | 1.0                                         | 5.7E-01                                               | 1.0                                         | 7.3E-01                                            | 1.0                                         | 2.3E-01                                            | 0.9                                         | 2.9E-01                                             | 0.9                                          |
| 543 | STIP1_HUMAN | STIP1                | 2.3E-09                                   | 1.3E-03                                | 2.6E-02                                            | 1.5                                         | 2.2E-02                                               | 1.5                                         | 1.8E-03                                            | 1.7                                         | 4.6E-05                                            | 2.0                                         | 1.7E-03                                             | 1.7                                          |



| No. | Uniprot ID  | Gene symbol              | <i>p</i> -value<br>(Subject)<br><i>a)</i> | <i>p</i> -value<br>(Time)<br><i>b)</i> | <i>p</i> -value<br>(1 mo vs.<br>0 mo)<br><i>c)</i> | Ratio<br>(1 mo<br>vs. 0<br>mo)<br><i>d)</i> | <i>p</i> -value<br>(3 mo<br>vs. 0<br>mo)<br><i>c)</i> | Ratio<br>(3 mo<br>vs. 0<br>mo)<br><i>d)</i> | <i>p</i> -value<br>(6 mo vs.<br>0 mo)<br><i>c)</i> | Ratio<br>(6 mo<br>vs. 0<br>mo)<br><i>d)</i> | <i>p</i> -value<br>(9 mo vs.<br>0 mo)<br><i>c)</i> | Ratio<br>(9 mo<br>vs. 0<br>mo)<br><i>d)</i> | <i>p</i> -value<br>(12 mo vs.<br>0 mo)<br><i>c)</i> | Ratio<br>(12 mo<br>vs. 0<br>mo)<br><i>d)</i> |
|-----|-------------|--------------------------|-------------------------------------------|----------------------------------------|----------------------------------------------------|---------------------------------------------|-------------------------------------------------------|---------------------------------------------|----------------------------------------------------|---------------------------------------------|----------------------------------------------------|---------------------------------------------|-----------------------------------------------------|----------------------------------------------|
| 544 | STX3_HUMAN  | STX3                     | 1.5E-08                                   | 8.6E-05                                | 1.2E-01                                            | 1.4                                         | 4.2E-03                                               | 1.9                                         | 3.0E-05                                            | 2.6                                         | 9.3E-05                                            | 2.4                                         | 1.8E-04                                             | 2.3                                          |
| 545 | STXB2_HUMAN | STXBP2                   | 2.6E-13                                   | 8.0E-06                                | 2.1E-02                                            | 1.2                                         | 9.7E-05                                               | 1.5                                         | 1.7E-07                                            | 1.7                                         | 2.4E-04                                            | 1.4                                         | 5.4E-04                                             | 1.4                                          |
| 546 | SUMO2_HUMAN | SUMO2P<br>SUMO3<br>SUMO2 | 2.7E-01                                   | 2.3E-04                                | 2.5E-03                                            | 1.4                                         | 1.3E-04                                               | 1.6                                         | 2.3E-04                                            | 1.5                                         | 2.3E-04                                            | 1.5                                         | 8.1E-05                                             | 1.6                                          |
| 547 | SYDC_HUMAN  | DARS                     | 1.1E-01                                   | 3.5E-01                                | 7.8E-01                                            | 1.0                                         | 4.2E-01                                               | 1.1                                         | 9.4E-02                                            | 1.1                                         | 1.7E-01                                            | 1.1                                         | 3.0E-01                                             | 1.1                                          |
| 548 | SYEP_HUMAN  | EPRS                     | 5.1E-04                                   | 3.4E-03                                | 5.2E-01                                            | 1.1                                         | 1.4E-02                                               | 1.7                                         | 5.5E-02                                            | 1.5                                         | 2.3E-04                                            | 2.3                                         | 1.3E-02                                             | 1.7                                          |
| 549 | SYSC_HUMAN  | SARS                     | 5.9E-04                                   | 2.7E-02                                | 3.9E-02                                            | 1.6                                         | 3.0E-03                                               | 2.0                                         | 6.6E-03                                            | 1.8                                         | 1.2E-02                                            | 1.8                                         | 1.3E-01                                             | 1.4                                          |
| 550 | SYTC_HUMAN  | TARS                     | 5.2E-06                                   | 5.2E-05                                | 1.6E-02                                            | 1.5                                         | 2.9E-05                                               | 2.1                                         | 2.3E-05                                            | 2.1                                         | 8.3E-05                                            | 2.0                                         | 3.2E-04                                             | 1.8                                          |
| 551 | SYWC_HUMAN  | WARS                     | 6.6E-07                                   | 1.8E-03                                | 1.8E-04                                            | 1.9                                         | 3.3E-03                                               | 1.6                                         | 2.6E-04                                            | 1.9                                         | 1.1E-02                                            | 1.5                                         | 3.2E-02                                             | 1.4                                          |
| 552 | SZT2_HUMAN  |                          | 1.4E-16                                   | 6.7E-06                                | 7.9E-07                                            | 0.6                                         | 3.9E-06                                               | 0.7                                         | 4.7E-05                                            | 0.7                                         | 5.3E-03                                            | 0.8                                         | 1.9E-03                                             | 0.8                                          |
| 553 | TAGL2_HUMAN | TAGLN2                   | 2.1E-07                                   | 3.5E-15                                | 1.9E-04                                            | 1.9                                         | 1.9E-08                                               | 2.9                                         | 4.1E-12                                            | 4.0                                         | 4.2E-14                                            | 4.7                                         | 4.2E-13                                             | 4.3                                          |
| 554 | TALDO_HUMAN | TALDO1                   | 5.6E-01                                   | 1.6E-03                                | 7.8E-01                                            | 1.0                                         | 1.3E-01                                               | 1.1                                         | 4.5E-04                                            | 1.3                                         | 1.7E-03                                            | 1.3                                         | 3.9E-02                                             | 1.2                                          |
| 555 | TBA1B_HUMAN | TUBA1B                   | 1.4E-05                                   | 3.3E-01                                | 7.1E-01                                            | 1.1                                         | 2.1E-01                                               | 1.3                                         | 3.5E-02                                            | 1.5                                         | 8.7E-01                                            | 1.0                                         | 4.2E-01                                             | 1.2                                          |
| 556 | TBB5_HUMAN  | TUBBP1<br>TUBBP2<br>TUBB | 3.4E-04                                   | 3.4E-02                                | 9.2E-02                                            | 0.7                                         | 5.2E-01                                               | 1.2                                         | 6.5E-01                                            | 1.1                                         | 8.8E-02                                            | 1.6                                         | 5.9E-01                                             | 0.9                                          |
| 557 | TBCA_HUMAN  | TBCA                     | 4.2E-05                                   | 5.0E-08                                | 2.0E-03                                            | 1.6                                         | 4.7E-06                                               | 2.1                                         | 6.3E-07                                            | 2.2                                         | 6.1E-08                                            | 2.4                                         | 3.6E-07                                             | 2.3                                          |
| 558 | TCO1_HUMAN  | TCN1                     | 4.1E-14                                   | 1.2E-40                                | 8.3E-03                                            | 0.8                                         | 2.0E-01                                               | 1.1                                         | 5.0E-10                                            | 2.0                                         | 1.8E-24                                            | 4.0                                         | 1.8E-29                                             | 5.1                                          |
| 559 | TCPA_HUMAN  | TCP1<br>TCP1P3           | 6.9E-10                                   | 8.4E-02                                | 8.1E-02                                            | 1.4                                         | 8.0E-03                                               | 1.6                                         | 2.0E-02                                            | 1.5                                         | 1.2E-02                                            | 1.6                                         | 4.7E-02                                             | 1.4                                          |
| 560 | TCPB_HUMAN  | CCT2                     | 7.4E-07                                   | 1.2E-01                                | 4.3E-02                                            | 1.5                                         | 1.1E-02                                               | 1.7                                         | 2.7E-02                                            | 1.5                                         | 4.6E-02                                            | 1.5                                         | 1.7E-01                                             | 1.3                                          |
| 561 | TCPD_HUMAN  | CCT4                     | 9.6E-05                                   | 1.6E-01                                | 5.0E-01                                            | 1.2                                         | 6.7E-02                                               | 1.5                                         | 5.7E-02                                            | 1.5                                         | 2.5E-02                                            | 1.6                                         | 5.5E-02                                             | 1.5                                          |
| 562 | TCPE_HUMAN  | CCT5                     | 5.6E-03                                   | 5.8E-01                                | 1.9E-01                                            | 1.2                                         | 2.9E-01                                               | 1.1                                         | 4.2E-01                                            | 1.1                                         | 2.7E-01                                            | 1.1                                         | 6.8E-02                                             | 1.2                                          |
| 563 | TCPG_HUMAN  | CCT3                     | 6.2E-07                                   | 1.7E-01                                | 2.5E-01                                            | 1.3                                         | 2.2E-02                                               | 1.6                                         | 3.4E-02                                            | 1.5                                         | 4.2E-02                                            | 1.5                                         | 5.4E-02                                             | 1.5                                          |
| 564 | TCPH_HUMAN  | CCT7                     | 9.3E-05                                   | 1.1E-01                                | 2.9E-01                                            | 1.2                                         | 1.3E-02                                               | 1.7                                         | 5.2E-02                                            | 1.5                                         | 1.9E-02                                            | 1.7                                         | 1.2E-01                                             | 1.4                                          |
| 565 | TCPQ_HUMAN  | CCT8<br>CCT8P1           | 7.3E-11                                   | 3.7E-02                                | 2.9E-02                                            | 1.5                                         | 1.7E-02                                               | 1.5                                         | 5.2E-03                                            | 1.6                                         | 2.6E-03                                            | 1.7                                         | 1.5E-02                                             | 1.5                                          |
| 566 | TCPZ_HUMAN  | CCT6A                    | 2.2E-09                                   | 1.5E-01                                | 3.1E-01                                            | 1.2                                         | 1.3E-02                                               | 1.6                                         | 2.9E-02                                            | 1.5                                         | 8.1E-02                                            | 1.4                                         | 1.5E-01                                             | 1.3                                          |
| 567 | TCTP_HUMAN  | TPT1                     | 7.5E-09                                   | 3.6E-07                                | 9.0E-04                                            | 1.8                                         | 1.3E-06                                               | 2.4                                         | 9.1E-08                                            | 2.6                                         | 1.0E-06                                            | 2.4                                         | 2.6E-05                                             | 2.1                                          |
| 568 | TENA_HUMAN  | TNC                      | 2.4E-06                                   | 0.0E+00                                | 2.8E-15                                            | 0.3                                         | 1.2E-36                                               | 0.1                                         | 0.0E+00                                            | 0.0                                         | 0.0E+00                                            | 0.0                                         | 0.0E+00                                             | 0.0                                          |
| 569 | TERA_HUMAN  | VCP                      | 4.1E-10                                   | 6.6E-07                                | 4.2E-02                                            | 1.4                                         | 9.8E-04                                               | 1.8                                         | 2.1E-06                                            | 2.4                                         | 1.5E-07                                            | 2.7                                         | 4.3E-05                                             | 2.1                                          |
| 570 | TETN_HUMAN  | CLEC3B                   | 2.2E-03                                   | 2.0E-13                                | 1.5E-09                                            | 1.5                                         | 2.9E-13                                               | 1.7                                         | 8.0E-11                                            | 1.6                                         | 1.1E-09                                            | 1.5                                         | 4.0E-10                                             | 1.6                                          |
| 571 | TGBR3_HUMAN | TGFB3                    | 4.5E-03                                   | 2.5E-01                                | 3.8E-01                                            | 0.9                                         | 5.7E-01                                               | 1.0                                         | 8.7E-01                                            | 1.0                                         | 4.8E-01                                            | 1.1                                         | 1.6E-01                                             | 1.1                                          |
| 572 | TGON2_HUMAN | TGOLN2                   | 5.9E-03                                   | 1.5E-21                                | 9.3E-06                                            | 1.4                                         | 9.0E-10                                               | 1.7                                         | 2.2E-15                                            | 2.1                                         | 2.8E-19                                            | 2.3                                         | 3.0E-19                                             | 2.3                                          |
| 573 | THBG_HUMAN  | SERPINA7                 | 1.8E-02                                   | 3.1E-17                                | 4.3E-06                                            | 0.7                                         | 9.0E-11                                               | 0.5                                         | 8.2E-12                                            | 0.5                                         | 2.2E-14                                            | 0.4                                         | 5.8E-18                                             | 0.3                                          |
| 574 | THIC_HUMAN  | ACAT2                    | 2.1E-01                                   | 2.3E-09                                | 1.4E-06                                            | 2.2                                         | 3.4E-09                                               | 2.8                                         | 1.7E-08                                            | 2.6                                         | 1.7E-08                                            | 2.5                                         | 6.0E-07                                             | 2.2                                          |
| 575 | THIO_HUMAN  | TXN                      | 2.9E-06                                   | 6.5E-05                                | 1.3E-03                                            | 1.6                                         | 3.2E-04                                               | 1.6                                         | 1.4E-05                                            | 1.8                                         | 9.6E-05                                            | 1.7                                         | 2.6E-05                                             | 1.8                                          |

| No. | Uniprot ID  | Gene symbol     | <i>p</i> -value<br>(Subject)<br><sup>a)</sup> | <i>p</i> -value<br>(Time)<br><sup>b)</sup> | <i>p</i> -value<br>(1 mo vs.<br>0 mo)<br><sup>c)</sup> | Ratio<br>(1 mo<br>vs. 0<br>mo)<br><sup>d)</sup> | <i>p</i> -value<br>(3 mo<br>vs. 0<br>mo)<br><sup>c)</sup> | Ratio<br>(3 mo<br>vs. 0<br>mo)<br><sup>d)</sup> | <i>p</i> -value<br>(6 mo vs.<br>0 mo)<br><sup>c)</sup> | Ratio<br>(6 mo<br>vs. 0<br>mo)<br><sup>d)</sup> | <i>p</i> -value<br>(9 mo vs.<br>0 mo)<br><sup>c)</sup> | Ratio<br>(9 mo<br>vs. 0<br>mo)<br><sup>d)</sup> | <i>p</i> -value<br>(12 mo vs.<br>0 mo)<br><sup>c)</sup> | Ratio<br>(12 mo<br>vs. 0<br>mo)<br><sup>d)</sup> |
|-----|-------------|-----------------|-----------------------------------------------|--------------------------------------------|--------------------------------------------------------|-------------------------------------------------|-----------------------------------------------------------|-------------------------------------------------|--------------------------------------------------------|-------------------------------------------------|--------------------------------------------------------|-------------------------------------------------|---------------------------------------------------------|--------------------------------------------------|
| 576 | THRB_HUMAN  | F2              | 5.1E-10                                       | 4.7E-10                                    | 2.6E-03                                                | 0.8                                             | 7.1E-07                                                   | 0.7                                             | 4.7E-06                                                | 0.7                                             | 5.7E-09                                                | 0.7                                             | 1.3E-10                                                 | 0.6                                              |
| 577 | TIMP1_HUMAN | TIMP1           | 2.1E-16                                       | 1.4E-02                                    | 2.0E-02                                                | 1.1                                             | 6.1E-03                                                   | 1.2                                             | 1.5E-02                                                | 1.1                                             | 5.4E-01                                                | 1.0                                             | 6.6E-01                                                 | 1.0                                              |
| 578 | TKT_HUMAN   | TKT             | 6.3E-10                                       | 4.6E-06                                    | 1.4E-03                                                | 1.5                                             | 1.9E-04                                                   | 1.6                                             | 4.0E-06                                                | 1.8                                             | 7.6E-07                                                | 1.9                                             | 6.6E-06                                                 | 1.8                                              |
| 579 | TLN1_HUMAN  | TLN1            | 1.8E-01                                       | 1.6E-02                                    | 3.0E-01                                                | 1.1                                             | 3.4E-02                                                   | 1.2                                             | 1.6E-02                                                | 1.3                                             | 2.6E-03                                                | 1.4                                             | 3.2E-03                                                 | 1.4                                              |
| 580 | TLR2_HUMAN  | TLR2            | 1.3E-11                                       | 5.6E-10                                    | 2.0E-02                                                | 0.8                                             | 1.6E-02                                                   | 0.8                                             | 3.5E-01                                                | 1.1                                             | 8.3E-02                                                | 1.1                                             | 3.5E-06                                                 | 1.5                                              |
| 581 | TM87B_HUMAN | TMEM87B         | 8.9E-01                                       | 8.3E-04                                    | 5.1E-01                                                | 1.0                                             | 8.2E-02                                                   | 0.9                                             | 1.4E-03                                                | 0.8                                             | 4.5E-03                                                | 0.8                                             | 4.5E-02                                                 | 0.9                                              |
| 582 | TNF10_HUMAN | TNFSF10         | 7.6E-03                                       | 3.4E-05                                    | 5.8E-04                                                | 0.4                                             | 1.7E-04                                                   | 0.4                                             | 1.3E-05                                                | 0.3                                             | 6.0E-04                                                | 0.5                                             | 2.7E-01                                                 | 0.8                                              |
| 583 | TPIS_HUMAN  | TP11 TP11P1     | 4.1E-11                                       | 3.6E-10                                    | 7.2E-04                                                | 1.5                                             | 1.9E-06                                                   | 1.7                                             | 6.5E-08                                                | 1.9                                             | 7.0E-10                                                | 2.1                                             | 5.9E-10                                                 | 2.1                                              |
| 584 | TPM1_HUMAN  | TPM1            | 1.9E-09                                       | 2.7E-04                                    | 2.0E-01                                                | 1.2                                             | 1.1E-03                                                   | 1.8                                             | 3.2E-05                                                | 2.1                                             | 5.4E-04                                                | 1.9                                             | 1.0E-02                                                 | 1.6                                              |
| 585 | TPM3_HUMAN  | TPM3            | 1.9E-07                                       | 1.6E-03                                    | 1.1E-01                                                | 1.4                                             | 1.3E-02                                                   | 1.6                                             | 4.5E-04                                                | 2.0                                             | 5.2E-03                                                | 1.7                                             | 1.9E-04                                                 | 2.1                                              |
| 586 | TPM4_HUMAN  | TPM4            | 1.3E-10                                       | 2.7E-02                                    | 1.2E-01                                                | 1.3                                             | 6.3E-02                                                   | 1.4                                             | 2.6E-02                                                | 1.5                                             | 5.5E-04                                                | 1.8                                             | 9.2E-02                                                 | 1.3                                              |
| 587 | TR11B_HUMAN | TNFRSF11B       | 1.2E-19                                       | 3.2E-09                                    | 7.0E-05                                                | 0.7                                             | 2.9E-06                                                   | 0.6                                             | 1.2E-07                                                | 0.6                                             | 7.5E-09                                                | 0.5                                             | 9.1E-10                                                 | 0.5                                              |
| 588 | TRFE_HUMAN  | TF              | 1.6E-15                                       | 2.4E-18                                    | 4.8E-07                                                | 0.8                                             | 6.0E-14                                                   | 0.6                                             | 6.4E-12                                                | 0.7                                             | 4.0E-18                                                | 0.6                                             | 3.1E-15                                                 | 0.6                                              |
| 589 | TRFL_HUMAN  | LTF             | 9.1E-04                                       | 2.4E-20                                    | 8.5E-06                                                | 0.8                                             | 3.0E-14                                                   | 0.6                                             | 7.9E-19                                                | 0.5                                             | 1.0E-17                                                | 0.6                                             | 6.4E-12                                                 | 0.7                                              |
| 590 | TRY1_HUMAN  | PRSS1 TRY6      | 2.6E-17                                       | 2.9E-01                                    | 1.1E-01                                                | 0.9                                             | 8.1E-01                                                   | 1.0                                             | 8.5E-01                                                | 1.0                                             | 8.7E-01                                                | 1.0                                             | 4.5E-01                                                 | 1.1                                              |
| 591 | TSN_HUMAN   | TSN             | 1.1E-07                                       | 2.6E-09                                    | 2.6E-04                                                | 1.8                                             | 2.1E-06                                                   | 2.3                                             | 1.6E-08                                                | 2.7                                             | 2.6E-09                                                | 2.9                                             | 1.4E-08                                                 | 2.7                                              |
| 592 | TSP1_HUMAN  | THBS1           | 1.0E-09                                       | 7.3E-27                                    | 1.5E-06                                                | 0.4                                             | 4.1E-15                                                   | 0.2                                             | 6.8E-22                                                | 0.1                                             | 1.6E-23                                                | 0.1                                             | 2.4E-21                                                 | 0.1                                              |
| 593 | TSTD1_HUMAN | TSTD1           | 6.2E-02                                       | 2.7E-09                                    | 5.2E-04                                                | 1.9                                             | 8.7E-06                                                   | 2.4                                             | 5.4E-07                                                | 2.8                                             | 5.4E-08                                                | 3.1                                             | 1.6E-10                                                 | 4.2                                              |
| 594 | TTHY_HUMAN  | TTR             | 3.1E-09                                       | 6.3E-03                                    | 1.8E-01                                                | 0.9                                             | 1.1E-01                                                   | 0.9                                             | 6.1E-01                                                | 1.0                                             | 2.5E-01                                                | 1.1                                             | 1.2E-02                                                 | 0.8                                              |
| 595 | TWF2_HUMAN  | TWF2            | 3.7E-01                                       | 1.8E-04                                    | 5.6E-03                                                | 1.5                                             | 1.7E-04                                                   | 1.7                                             | 8.3E-05                                                | 1.7                                             | 3.4E-05                                                | 1.8                                             | 1.8E-03                                                 | 1.5                                              |
| 596 | TXD17_HUMAN | TXNDC17         | 3.7E-09                                       | 1.4E-11                                    | 3.8E-06                                                | 1.9                                             | 1.8E-08                                                   | 2.3                                             | 1.4E-10                                                | 2.6                                             | 2.3E-11                                                | 2.7                                             | 6.6E-10                                                 | 2.4                                              |
| 597 | TXND5_HUMAN | MUTED<br>TXNDC5 | 8.8E-03                                       | 2.9E-04                                    | 1.1E-01                                                | 1.1                                             | 2.0E-03                                                   | 1.3                                             | 3.9E-01                                                | 1.1                                             | 8.5E-04                                                | 1.3                                             | 4.4E-05                                                 | 1.5                                              |
| 598 | TYB10_HUMAN | TMSB10          | 3.7E-01                                       | 1.5E-02                                    | 5.5E-03                                                | 1.4                                             | 1.6E-03                                                   | 1.4                                             | 4.9E-03                                                | 1.4                                             | 2.9E-02                                                | 1.3                                             | 6.6E-03                                                 | 1.4                                              |
| 599 | UB2L3_HUMAN | UBE2L3          | 1.3E-04                                       | 1.8E-08                                    | 3.3E-04                                                | 1.6                                             | 3.6E-06                                                   | 1.9                                             | 1.1E-06                                                | 2.1                                             | 6.8E-08                                                | 2.2                                             | 1.4E-08                                                 | 2.4                                              |
| 600 | UBA1_HUMAN  | UBA1            | 4.0E-10                                       | 3.6E-06                                    | 2.3E-03                                                | 1.6                                             | 6.1E-06                                                   | 2.0                                             | 2.1E-06                                                | 2.1                                             | 2.1E-06                                                | 2.1                                             | 2.1E-05                                                 | 1.9                                              |
| 601 | UBE2N_HUMAN | UBE2N           | 7.7E-03                                       | 1.6E-03                                    | 2.5E-01                                                | 1.1                                             | 1.6E-02                                                   | 1.3                                             | 5.2E-03                                                | 1.4                                             | 7.8E-04                                                | 1.5                                             | 2.0E-04                                                 | 1.5                                              |
| 602 | UFM1_HUMAN  | UFM1            | 6.4E-02                                       | 3.4E-02                                    | 4.9E-02                                                | 1.3                                             | 4.9E-02                                                   | 1.3                                             | 1.1E-01                                                | 1.3                                             | 5.1E-03                                                | 1.5                                             | 2.5E-03                                                 | 1.6                                              |
| 603 | UGPA_HUMAN  | UGP2            | 6.1E-12                                       | 2.0E-05                                    | 9.1E-06                                                | 2.0                                             | 9.2E-06                                                   | 2.0                                             | 1.8E-05                                                | 2.0                                             | 2.0E-03                                                | 1.6                                             | 1.4E-02                                                 | 1.5                                              |
| 604 | VAS1_HUMAN  | ATP6AP1         | 5.3E-11                                       | 2.3E-19                                    | 9.3E-01                                                | 1.0                                             | 1.2E-06                                                   | 1.4                                             | 8.7E-10                                                | 1.5                                             | 5.3E-14                                                | 1.7                                             | 2.0E-15                                                 | 1.7                                              |
| 605 | VINC_HUMAN  | VCL             | 1.3E-01                                       | 1.4E-01                                    | 3.3E-01                                                | 1.1                                             | 7.1E-01                                                   | 1.0                                             | 4.4E-01                                                | 1.1                                             | 1.0E-02                                                | 1.3                                             | 9.6E-02                                                 | 1.2                                              |
| 606 | VTDB_HUMAN  | GC              | 2.4E-10                                       | 3.1E-03                                    | 1.3E-01                                                | 0.9                                             | 4.9E-01                                                   | 1.0                                             | 1.5E-02                                                | 1.1                                             | 1.4E-01                                                | 1.1                                             | 1.7E-01                                                 | 1.1                                              |
| 607 | VTNC_HUMAN  | VTN             | 3.6E-01                                       | 2.0E-09                                    | 9.8E-01                                                | 1.0                                             | 2.0E-03                                                   | 0.9                                             | 4.2E-04                                                | 0.9                                             | 1.3E-05                                                | 0.8                                             | 1.1E-08                                                 | 0.8                                              |
| 608 | VWA1_HUMAN  | VWA1            | 1.4E-09                                       | 2.3E-06                                    | 1.9E-05                                                | 0.8                                             | 2.5E-05                                                   | 0.8                                             | 8.5E-08                                                | 0.7                                             | 2.1E-05                                                | 0.8                                             | 7.3E-05                                                 | 0.8                                              |
| 609 | WDR1_HUMAN  | WDR1            | 1.9E-12                                       | 1.1E-05                                    | 3.1E-03                                                | 1.5                                             | 1.6E-04                                                   | 1.7                                             | 1.4E-05                                                | 1.9                                             | 3.7E-06                                                | 2.0                                             | 4.2E-06                                                 | 2.0                                              |
| 610 | XDH_HUMAN   | XDH             | 2.7E-12                                       | 3.0E-10                                    | 2.7E-04                                                | 1.4                                             | 6.7E-10                                                   | 1.7                                             | 5.6E-11                                                | 1.8                                             | 3.9E-06                                                | 1.5                                             | 1.9E-05                                                 | 1.4                                              |
| 611 | XPP1_HUMAN  | XPNPEP1         | 4.3E-03                                       | 1.9E-03                                    | 7.9E-02                                                | 1.4                                             | 5.3E-04                                                   | 2.0                                             | 1.4E-04                                                | 2.2                                             | 1.8E-02                                                | 1.6                                             | 2.4E-02                                                 | 1.5                                              |

| No. | Uniprot ID  | Gene symbol      | <i>p</i> -value<br>(Subject)<br><sup>a)</sup> | <i>p</i> -value<br>(Time)<br><sup>b)</sup> | <i>p</i> -value<br>(1 mo vs.<br>0 mo)<br><sup>c)</sup> | Ratio<br>(1 mo<br>vs. 0<br>mo)<br><sup>d)</sup> | <i>p</i> -value<br>(3 mo<br>vs. 0<br>mo)<br><sup>c)</sup> | Ratio<br>(3 mo<br>vs. 0<br>mo)<br><sup>d)</sup> | <i>p</i> -value<br>(6 mo vs.<br>0 mo)<br><sup>c)</sup> | Ratio<br>(6 mo<br>vs. 0<br>mo)<br><sup>d)</sup> | <i>p</i> -value<br>(9 mo vs.<br>0 mo)<br><sup>c)</sup> | Ratio<br>(9 mo<br>vs. 0<br>mo)<br><sup>d)</sup> | <i>p</i> -value<br>(12 mo vs.<br>0 mo)<br><sup>c)</sup> | Ratio<br>(12 mo<br>vs. 0<br>mo)<br><sup>d)</sup> |
|-----|-------------|------------------|-----------------------------------------------|--------------------------------------------|--------------------------------------------------------|-------------------------------------------------|-----------------------------------------------------------|-------------------------------------------------|--------------------------------------------------------|-------------------------------------------------|--------------------------------------------------------|-------------------------------------------------|---------------------------------------------------------|--------------------------------------------------|
| 612 | YIPF3_HUMAN | YIPF3            | 2.0E-03                                       | 8.0E-01                                    | 3.3E-01                                                | 1.0                                             | 7.2E-01                                                   | 1.0                                             | 4.2E-01                                                | 1.0                                             | 9.3E-01                                                | 1.0                                             | 3.1E-01                                                 | 1.0                                              |
| 613 | YKT6_HUMAN  | YKT6             | 2.3E-09                                       | 1.2E-01                                    | 4.0E-01                                                | 1.1                                             | 1.6E-02                                                   | 1.3                                             | 1.6E-02                                                | 1.3                                             | 2.8E-01                                                | 1.1                                             | 2.1E-01                                                 | 1.1                                              |
| 614 | ZA2G_HUMAN  | AZGP1<br>AZGP1P1 | 8.1E-12                                       | 1.0E-23                                    | 7.5E-01                                                | 1.0                                             | 1.8E-07                                                   | 1.4                                             | 1.1E-10                                                | 1.5                                             | 5.9E-18                                                | 1.8                                             | 2.2E-17                                                 | 1.7                                              |
| 615 | ZG16B_HUMAN | ZG16B            | 4.4E-07                                       | 2.1E-14                                    | 7.5E-12                                                | 0.3                                             | 8.9E-13                                                   | 0.3                                             | 4.0E-11                                                | 0.3                                             | 9.6E-13                                                | 0.3                                             | 5.7E-09                                                 | 0.4                                              |

(a) Significance *p*-value for the changes of relative protein abundance with respect to biological subjects ( $n = 10$ ); (b) Significance *p*-value for the changes of relative protein abundance with respect to lactation time ( $x$  mo / 0 mo,  $x = 1, 3, 6, 9$  and 12); (c) Significance *p*-value for the changes of protein ratios at  $x$  mo ( $x = 1, 3, 6, 9$  and 12) with respect to 0 mo; (d) Relative protein abundance ratios ( $x$  mo / 0 mo,  $x = 1, 3, 6, 9$  and 12).
